# Supplementary material for: Integrated Epigenetics of Human Breast Cancer: Synoptic Investigation of Targeted Genes, MicroRNAs and Proteins upon Demethylation Treatment
Source: PLoS One. 2011 Nov 4;6(11):e27355. doi: 10.1371/journal.pone.0027355 (PMC3208622; doi:10.1371/journal.pone.0027355)
Supplement: Dataset S5 — List of significantly up/down-regulated genes/miRNAs as early or late effects of the treatment in three cell lines. (XLS) [file pone.0027355.s005.xls]

## Sheet: HB2 Genes
HB2 Different Passages (7)			HB2 Different Passages (7)
Uonion Genes			Intersection Genes			HB2 Treated vs. HB2 Un-treated				HB2 P1 vs. HB2 Un-treated				HB2 P3 vs. HB2 Un-treated				HB2 P5 vs. HB2 Un-treated				HB2 P7 vs. HB2 Un-treated				HB2 P10 vs. HB2 Un-treated
Gene Symbole	Gene Description		Gene Symbole	Gene Description		Gene Symbole	P-Value	Fold-Change		Gene Symbole	P-Value	Fold-Change		Gene Symbole	P-Value	Fold-Change		Gene Symbole	P-Value	Fold-Change		Gene Symbole	P-Value	Fold-Change		Gene Symbole	P-Value	Fold-Change
ABAT	4-aminobutyrate aminotransferase		BST2	bone marrow stromal cell antigen 2		AGAP1	7.29702e-10	-2.24969		ACSL5	3.66985e-05	2.07332		ABCA1	0.000142448	2.05672		ABAT	5.70321e-05	-2.1407		ABCA1	1.052e-08	4.09648		ABCA1	1.24299e-07	3.36309
ABCA1	ATP-binding cassette, sub-family A (ABC		C15orf48	chromosome 15 open reading frame 48		AKR1B15	0.000334178	3.1615		AKR1B15	0.00044652	3.06009		AKR1B15	0.000220796	3.31248		ACAD11	5.72215e-06	2.08166		ADRB2	6.15688e-05	3.81487		ACSL5	2.60117e-05	2.11648
ACAD11	acyl-Coenzyme A dehydrogenase family, m		CDKN1A	cyclin-dependent kinase inhibitor 1A (p		APOBEC3G	1.65132e-06	2.87717		APOBEC3G	2.15854e-06	2.82143		APOBEC3G	3.31418e-06	2.7352		ACTR3C	0.000346333	-2.92599		ALDH2	1.43634e-11	4.99705		ADD3	1.50563e-09	-2.38568
ACSL5	acyl-CoA synthetase long-chain family m		COL1A1	collagen, type I, alpha 1		APOL1	2.66857e-08	3.10302		APOL1	4.53533e-07	2.57862		APOL1	5.79541e-07	2.53958		ADM	6.35987e-06	2.16409		ARL14	0.00493704	2.04355		ADM	2.65581e-06	2.27578
ACTR3C	actin-related Arp11		DDX58	DEAD (Asp-Glu-Ala-Asp) box polypeptide		ATP10A	0.000409573	-2.13802		APOLD1	4.78515e-08	2.02197		ASS1	3.03195e-05	2.58694		ADRB2	8.16305e-07	6.36532		ASPHD1	4.35916e-08	2.28106		ADRB2	3.44624e-06	5.33716
ADD3	adducin 3 (gamma)		Ddx60	DEAD (Asp-Glu-Ala-Asp) box polypeptide		ATP6V1C2	1.25164e-06	2.27016		ATP6V1C2	3.17173e-08	2.82453		ATP6V1C2	5.76593e-08	2.72106		AFAP1	2.01961e-06	2.34363		ATP10A	4.6535e-05	-2.52335		ALPP	1.99607e-05	-2.71893
ADM	adrenomedullin		GPNMB	glycoprotein (transmembrane) nmb		Acot4	5.07165e-09	2.69756		Acot4	1.39263e-09	2.91204		Acot4	7.80634e-11	3.50433		AHNAK2	1.30721e-06	-2.00148		ATP6V0A4	2.40899e-05	2.61246		ANKDD1A	0.000259545	-2.13544
ADRB2	adrenergic, beta-2-, receptor, surface		ICAM1	intercellular adhesion molecule 1		Acpl2	2.37039e-10	2.00279		Acpl2	5.26769e-11	2.12532		Acpl2	1.18981e-12	2.51235		ALG13	6.48347e-05	2.16239		Acpl2	1.27417e-10	2.05158		ANXA6	2.98926e-05	2.16689
AFAP1	actin filament associated protein 1		IFI16	interferon, gamma-inducible protein 16		BST2	7.9152e-09	7.96478		BST2	1.14285e-09	10.1735		Ang	1.91222e-05	2.91544		ALPP	1.56087e-06	-3.34196		Adam8	0.00112841	2.06887		ANXA9	3.66446e-05	-2.38608
AGAP1	ArfGAP with GTPase domain, ankyrin repe		IFI44	interferon-induced protein 44		BTBD11	2.01504e-08	-2.73774		Batf	0.000582533	2.5315		BEX1	0.00158173	-2.3243		AMMECR1	1.87055e-10	-2.02082		Aldh6a1	2.91776e-06	-2.08109		APOM	1.55509e-05	-2.1009
AHNAK2	AHNAK nucleoprotein 2		IL32	interleukin 32		Batf	0.000147551	2.88854		C15orf48	2.28544e-06	3.64799		BST2	9.2783e-10	10.4568		AMMECR1L	3.34032e-11	2.06876		B3galnt1	2.36581e-07	2.2156		AQP3	4.9005e-06	-2.568
AKR1B15	aldo-keto reductase family 1, member B1		IL6	interleukin 6 (interferon, beta 2)		C15orf48	1.87083e-06	3.71526		C1orf38	2.09838e-07	2.80142		BTN3A1	1.60973e-06	2.16595		AP1S1	4.33847e-08	-2.17435		BDKRB1	0.000616602	2.45421		ARRB1	4.65661e-06	-2.11267
ALDH2	aldehyde dehydrogenase 2 family (mitoch		ITGBL1	integrin, beta-like 1 (with EGF-like re		C17orf103	3.14144e-06	2.04173		C4orf26	0.00119131	2.77018		BTN3A2	4.02066e-08	2.50775		ARMC7	1.13747e-09	-2.15524		BDKRB2	0.000419371	2.78817		ASPHD1	1.2627e-08	2.43177
ALG13	asparagine-linked glycosylation 13 homo		Maff	v-maf musculoaponeurotic fibrosarcoma o		C19orf46	0.000453409	2.21586		CASP1	0.000708462	2.21139		Batf	0.000192768	2.81516		ARMC9	3.08959e-11	-2.44329		BIRC3	0.00180691	2.14781		ATP10A	1.29042e-07	-4.09386
ALPP	alkaline phosphatase, placental (Regan		RSAD2	radical S-adenosyl methionine domain co		C1orf213	3.51805e-05	-2.66751		CATSPER1	1.78511e-06	2.16141		Btn3a3	2.06551e-08	2.43503		ASAP3	1.14527e-06	-2.17295		BPGM	1.82961e-08	-2.99125		Adam8	0.00108814	2.07497
AMMECR1	Alport syndrome, mental retardation, mi		id1	inhibitor of DNA binding 1, dominant ne		C1orf38	2.82615e-07	2.74704		CCL22	0.000254303	2.47259		C10orf114	1.50053e-07	-2.01944		ASPHD2	2.06247e-10	2.24759		BST2	7.02823e-05	3.03574		Agphd1	0.000732357	-2.11671
AMMECR1L	AMME chromosomal region gene 1-like		pstpip2	proline-serine-threonine phosphatase in		C1orf63	0.000117359	-2.66864		CD74	5.22607e-05	2.08886		C15orf48	6.76632e-08	5.11098		ASPM	1.50185e-05	-2.06189		Batf	0.0045617	2.07278		Agr2	3.62568e-05	-2.74942
ANKDD1A	ankyrin repeat and death domain contain					C2orf54	0.000448154	2.23774		CDKN1A	8.26447e-08	2.81471		C17orf103	1.2339e-06	2.14253		ASS1	1.85352e-05	2.68707		Bnc1	0.000215232	2.02116		Aldh3b1	6.58099e-08	-2.5092
ANXA6	annexin A6					C4orf26	0.00214075	2.58988		CFB	5.02781e-05	4.23464		C17orf91	0.000141954	-2.15366		ATP6V1E2	5.80532e-09	2.16718		C10orf116	7.079e-06	-2.07661		Aldh6a1	4.5356e-07	-2.2988
ANXA9	annexin A9					CCL22	2.67671e-06	3.70394		CKB	8.49728e-08	2.19655		C1orf38	2.19851e-08	3.2707		Acaa1	1.37852e-10	-2.41283		C11orf70	1.48624e-10	-2.8706		BEX1	0.00229134	2.24103
AP1S1	adaptor-related protein complex 1, sigm					CCPG1	8.25805e-07	2.03412		CMPK2	1.12306e-08	6.03398		C1r	0.000314015	2.34886		Acpl2	2.09665e-11	2.20815		C12orf59	8.83369e-11	11.7408		BIRC3	0.00129405	2.21356
APOBEC3G	apolipoprotein B mRNA editing enzyme, c					CDKN1A	9.60787e-08	2.78754		COL1A1	6.75614e-05	2.19454		C4orf26	0.00515909	2.33765		Agr2	2.69398e-06	-3.42769		C15orf48	3.63119e-07	4.33165		BLVRB	2.22198e-06	-2.12698
APOL1	apolipoprotein L, 1					CFB	0.000396506	3.30829		CTH	1.04671e-09	2.37179		C6orf105	1.80365e-08	2.37955		Akna	2.6111e-09	2.88856		C17orf60	3.13573e-07	2.82617		BPGM	4.85587e-10	-3.86031
APOLD1	apolipoprotein L domain containing 1					CHKB	0.000371032	-2.37126		Ccl2	1.46265e-07	7.92092		CASP1	8.78545e-05	2.63464		Atp6v0e2	7.02782e-12	-2.23698		C1s	2.89393e-06	3.01157		BST2	0.000729518	2.4341
APOM	apolipoprotein M					CKB	2.20134e-07	2.0977		Ceacam6	1.93068e-10	6.52533		CATSPER1	6.69261e-06	2.01586		BCAT1	1.16791e-08	2.5884		C21orf91	4.89345e-07	-2.00082		C10orf114	1.49549e-07	-2.01974
AQP3	aquaporin 3 (Gill blood group)					CMPK2	4.9089e-09	6.59867		Cyp11a1	5.48956e-07	2.60934		CCL22	0.000159952	2.57357		BCL6	1.01509e-06	-2.62465		C8orf4	2.85633e-07	16.3419		C10orf116	5.73052e-07	-2.39062
ARL14	ADP-ribosylation factor-like 14					COL1A1	6.10295e-06	2.5872		DDX58	5.281e-07	3.23761		CCL28	1.10334e-05	2.25596		BIRC3	1.61049e-06	4.09453		CAPS	0.000479615	-2.0741		C10orf54	1.31077e-06	-2.01386
ARMC7	armadillo repeat containing 7					CSAD	0.00619682	-2.07275		DDX60L	5.04355e-08	2.60542		CCPG1	1.08476e-06	2.00783		BPGM	2.8505e-09	-3.39391		CCL20	0.00210245	4.9311		C10orf82	1.14823e-05	-2.16704
ARMC9	armadillo repeat containing 9					CTH	2.30008e-10	2.55945		Ddx60	3.22921e-10	4.66498		CD302	3.61054e-05	2.60627		BRCC3	9.20568e-08	-2.04181		CCL5	0.00023436	2.86354		C11orf52	6.31166e-06	-2.31804
ARRB1	arrestin, beta 1					Card6	7.1916e-05	2.078		Dhrs2	7.65823e-09	4.34419		CD40	3.64326e-08	2.42892		BST2	1.19198e-05	3.60216		CD302	0.000136	2.35118		C11orf70	5.57392e-12	-3.51685
ASAP3	ArfGAP with SH3 domain, ankyrin repeat					Ccdc80	5.09465e-06	-2.09188		EFHD1	9.23087e-06	2.66148		CD74	1.92356e-07	3.01697		C10orf110	0.00235277	-2.00203		CEACAM1	2.00079e-10	4.41924		C15orf48	8.05936e-08	5.0216
ASPHD1	aspartate beta-hydroxylase domain conta					Ccl2	0.000121432	3.52952		EPSTI1	6.28143e-06	2.60589		CDKN1A	1.45112e-07	2.71516		C15orf48	4.11117e-11	12.0997		CFB	0.000132291	3.77035		C1orf116	1.69939e-06	-2.2462
ASPHD2	aspartate beta-hydroxylase domain conta					Ccnl2	0.00114447	-2.0246		ETV7	5.27585e-05	3.17342		CFB	1.49722e-06	6.566		C17orf103	3.20875e-06	2.03953		CLDN1	0.000265369	2.04718		C1orf133	2.45929e-06	2.0314
ASPM	asp (abnormal spindle) homolog, microce					Ceacam6	1.01503e-07	3.67547		Ecm1	7.86623e-07	2.63369		CHAC1	2.30141e-05	2.19043		C1orf116	4.00198e-07	-2.44039		COL13A1	1.07017e-08	3.30222		C21orf91	3.18639e-07	-2.04082
ASS1	argininosuccinate synthetase 1					Crat	3.65971e-06	2.63118		FOLR1	3.45348e-09	6.03247		CHML	4.11494e-08	-2.13642		C1r	0.0001228	2.53953		COL1A1	9.90656e-09	4.23978		C4orf19	1.58896e-08	-3.19864
ATP10A	ATPase, class V, type 10A					Cyp11a1	1.53447e-07	2.83445		Fbp1	0.000154367	2.47956		CKB	2.43696e-08	2.33862		C20orf199	3.54505e-14	2.0466		CREB5	1.49312e-08	6.38005		C4orf26	0.0120418	2.11196
ATP6V0A4	ATPase, H+ transporting, lysosomal V0 s					DDX58	5.95249e-08	3.86028		GALNT12	1.54e-06	2.58742		CMPK2	4.96969e-08	5.17154		C3	0.000782501	2.26716		CRISPLD1	9.29593e-08	-2.83597		C9orf116	3.86109e-06	-2.01663
ATP6V1C2	ATPase, H+ transporting, lysosomal 42kD					DDX60L	3.12269e-07	2.34753		GBP1	1.28728e-05	2.73759		COL1A1	0.000106971	2.12802		C6orf129	1.05342e-05	-2.07569		CRISPLD2	4.712e-08	3.01013		C9orf167	1.14584e-07	2.11473
ATP6V1E2	ATPase, H+ transporting, lysosomal 31kD					DNAJC22	2.54315e-06	2.32423		GBP3	2.26176e-05	2.08011		CRABP1	0.00101223	2.24545		C7orf40	4.69987e-13	2.97085		CSGALNACT1	2.03047e-06	2.28915		CALB2	6.64179e-05	2.00081
Acaa1	acetyl-Coenzyme A acyltransferase 1					Ddx60	1.67854e-10	4.9364		GDA	0.000204485	2.63161		CTH	9.57589e-11	2.68045		C9orf91	5.93135e-16	3.35184		CTHRC1	1.4367e-09	6.48332		CAMK2D	6.29548e-08	-2.00034
Acot4	acyl-CoA thioesterase 4					Dhrs2	2.55053e-08	3.92469		GIPC2	5.76624e-06	2.83835		CXCL1	0.00469543	3.3		CAPN1	3.30884e-09	-2.01032		CXCL1	3.69187e-06	10.4242		CAPS	4.21716e-07	-3.57445
Acpl2	acid phosphatase-like 2					EFHC1	4.11777e-06	-2.02541		GPNMB	2.29353e-06	2.86508		Ccl2	1.32759e-08	10.998		CAPS	1.12543e-05	-2.74751		CXCL2	0.000152002	4.15101		CCNA1	1.98102e-07	-2.88942
Adam8	ADAM metallopeptidase domain 8					EFHD1	9.48534e-06	2.65615		Gdf15	0.000224683	2.81266		Ceacam6	2.26648e-08	4.16749		CCNB1IP1	6.0725e-12	2.17148		CYGB	2.94799e-05	2.00623		CD302	9.68278e-05	2.41369
Agphd1	aminoglycoside phosphotransferase domai					ELOVL4	1.03121e-07	2.50563		Gja5	1.1446e-05	2.009		Chac2	0.00019976	-2.12663		CCPG1	3.71904e-08	2.37689		CYP27B1	2.97638e-08	3.02275		CD40	1.07781e-06	2.04195
Agr2	anterior gradient homolog 2 (Xenopus la					EPB41L4A	4.05801e-05	-2.15726		Gldc	0.00361392	2.04565		Crat	1.32483e-06	2.82644		CD302	6.09154e-07	3.63903		Ccl2	3.08212e-10	19.569		CD44	3.08234e-06	2.09147
Akna	AT-hook transcription factor					EPSTI1	2.67232e-05	2.35585		H19	2.9468e-07	10.4912		Cxcl6	0.00195246	4.12261		CD74	2.02744e-06	2.56894		Cd52	0.000421149	2.86559		CD83	3.95533e-07	2.30205
Aldh3b1	aldehyde dehydrogenase 3 family, member					ERP27	0.00141213	2.04049		HERC5	4.17127e-13	6.25099		Cyp11a1	1.24201e-07	2.87456		CD82	2.47653e-05	2.15779		Cnrip1	0.000272568	2.9756		CDH2	1.12603e-06	2.28214
Aldh6a1	aldehyde dehydrogenase 6 family, member					ETV7	8.73123e-05	3.02265		HLA-B	1.73148e-07	2.22193		DDX58	1.36886e-06	3.00916		CD83	1.1503e-09	3.2768		Col4a1	3.72209e-06	2.43858		CDKN1A	2.96293e-07	2.59638
Ang	angiogenin, ribonuclease, RNase A famil					Ecm1	6.14668e-05	2.0115		HLA-DRA	0.000495995	2.53108		DDX60L	2.28299e-06	2.10865		CDKN1A	1.58953e-08	3.14034		Col6a3	4.6689e-11	21.2819		CLDN1	3.93917e-05	2.33522
Atp6v0e2	ATPase, H+ transporting V0 subunit e2					Egfl8	0.000150903	-2.24905		HLA-F	9.31124e-06	2.18953		DKK1	1.89162e-08	-2.96253		CEBPG	8.03095e-14	3.18176		Cxcl6	3.59065e-05	8.07996		CLDN3	3.14303e-06	-2.3564
B3galnt1	beta-1,3-N-acetylgalactosaminyltransfer					FAT3	0.00107872	-2.11817		HRASLS2	7.03089e-07	3.46558		DLEU1	6.12404e-06	-2.11021		CETN2	1.92502e-07	-2.04213		Cyp24a1	7.9305e-09	11.2108		COL1A1	3.62703e-09	4.62671
BCAT1	branched chain aminotransferase 1, cyto					FOLR1	4.09929e-11	9.97074		HSD17B11	2.5368e-08	2.53596		DNAJC22	3.28474e-05	2.00409		CFB	2.25529e-08	11.7434		DCAF4L1	4.60984e-08	3.76502		CREB5	1.31254e-08	6.4718
BCL6	B-cell CLL/lymphoma 6					FOXQ1	4.72942e-07	-2.05633		HSH2D	2.12737e-05	2.43296		DRAM1	2.45782e-09	2.16432		CHSY1	3.01933e-09	2.07448		DDX60L	1.96498e-06	2.12535		CRIP2	2.50088e-07	-2.57907
BDKRB1	bradykinin receptor B1					Fam113a	7.43522e-05	-2.01286		Hsd17b1	3.93903e-08	3.85987		Ddx60	4.23161e-10	4.5592		CLDN1	2.15185e-06	2.87676		DMBT1	6.99558e-09	5.48174		CRISPLD1	3.26757e-10	-4.2676
BDKRB2	bradykinin receptor B2					Fer1l4	0.00369693	-2.04039		ICAM1	1.42274e-07	3.82858		Dhrs2	6.16759e-06	2.58908		CMPK2	2.57317e-08	5.53137		Ddx60	9.53429e-07	2.58643		CRISPLD2	2.06374e-08	3.18563
BEX1	brain expressed, X-linked 1					Fjx1	2.78741e-05	-2.64757		IFI16	1.08823e-06	2.71735		EFHD1	1.1108e-07	3.75908		COL1A1	4.86165e-07	3.10704		Dner	3.24532e-06	3.40055		CSGALNACT1	2.31829e-06	2.27166
BIRC3	baculoviral IAP repeat-containing 3					GABRP	1.76054e-05	3.38027		IFI27	1.50737e-18	92.753		EPB41L4A	1.41375e-06	-2.68776		COL4A5	0.000128649	-2.10428		EGFLAM	1.37119e-08	3.11014		CTSH	3.69101e-07	-2.39941
BLVRB	biliverdin reductase B (flavin reductas					GBP1	6.79795e-05	2.41162		IFI35	1.90083e-05	2.46838		EPSTI1	0.000191079	2.0616		COMMD9	1.08848e-07	-2.05661		EMR1	1.55663e-09	10.0025		CXCL1	4.00103e-07	15.3326
BPGM	2,3-bisphosphoglycerate mutase					GCHFR	9.59387e-05	2.02324		IFI44	1.06716e-08	4.78043		ERP27	0.000111088	2.50931		COMT	9.27021e-10	-2.34725		EMR2	0.000505915	2.01715		CXCL2	2.60272e-06	7.14449
BRCC3	BRCA1/BRCA2-containing complex, subunit					GIP	8.03617e-07	2.07049		IFI6	7.33797e-09	9.81248		ETV7	3.6892e-05	3.28567		CRELD2	7.44428e-08	-2.40345		EPB41L4A	7.06904e-09	-3.97895		CXXC5	6.90265e-07	-2.69086
BST2	bone marrow stromal cell antigen 2					GIPC2	1.1543e-05	2.69231		IFIH1	3.72692e-05	2.84139		Ecm1	9.21856e-07	2.60666		CROT	7.17309e-10	-2.32304		Ecm1	2.90424e-06	2.42243		CYP27B1	1.493e-09	3.73686
BTBD11	BTB (POZ) domain containing 11					GPNMB	3.90997e-06	2.75482		IFIT1	2.98646e-06	3.77229		Egfl8	0.000549766	-2.04501		CSGALNACT1	3.546e-06	2.21687		Egr1	6.39789e-05	-2.94169		Ccl2	7.30384e-11	24.9772
BTN3A1	butyrophilin, subfamily 3, member A1					Gabre	0.000215645	-3.00236		IGDCC4	3.30393e-06	2.19457		Enpp5	4.23826e-05	2.14284		CSRP2	1.38119e-05	2.01943		Ephx2	4.20061e-06	-3.10895		Cnrip1	1.12775e-06	5.39825
BTN3A2	butyrophilin, subfamily 3, member A2					Gdf15	6.98961e-05	3.15298		IGFL1	1.92062e-10	4.06766		FAM113B	2.20695e-07	2.19012		CTSL2	1.28128e-08	-2.274		F2R	0.000891398	2.17728		Coch	7.12024e-07	2.21482
Batf	basic leucine zipper transcription fact					H19	5.35344e-07	9.58533		IL1F5	0.000394082	2.0421		FAT3	0.000279349	-2.36938		CXCL1	4.92442e-07	14.7743		FAM89A	3.26245e-09	2.62119		Col4a1	3.86473e-06	2.43271
Bnc1	basonuclin 1					HERC5	8.3237e-14	7.31748		IL32	7.84454e-08	4.07991		FBLN2	5.19873e-05	2.08201		CXCL2	1.10383e-08	16.3111		FAT3	0.00174188	-2.03512		Cxcl6	3.69439e-05	8.04075
Btn3a3	butyrophilin, subfamily 3, member A3					HLA-DRA	0.000492246	2.53289		IL6	0.00021358	4.69091		FBLN7	7.52369e-06	2.75891		CXXC5	2.53428e-05	-2.14194		FGFR2	0.00303935	-2.16616		DDX58	3.52932e-05	2.3741
C10orf110	chromosome 10 open reading frame 110					HLA-F	2.39865e-05	2.07157		IRAK2	5.71263e-06	2.11593		FOLR1	8.79587e-11	9.08498		CYLD	4.11968e-14	2.32559		FLJ44342	0.00337505	2.10889		DDX60L	3.38172e-06	2.06583
C10orf114	chromosome 10 open reading frame 114					HRASLS2	3.99519e-05	2.51653		IRF7	1.89246e-06	2.72401		Fam46b	1.25536e-07	-2.45526		Camta2	2.48893e-09	2.19159		FOSL1	0.00262174	2.00512		DNAL4	6.9669e-06	-2.13011
C10orf116	chromosome 10 open reading frame 116					HSD17B11	7.95411e-10	3.12082		IRF9	5.18407e-09	3.50232		Fap	0.00267105	-2.07399		Cd55	3.77832e-10	2.23738		FREM2	0.000450221	-2.67838		DUSP9	1.27154e-05	-2.71813
C10orf54	chromosome 10 open reading frame 54					HSH2D	0.000257586	2.04774		ISG15	3.17377e-08	5.26658		Fbp1	8.56669e-07	3.88265		Cdca2	5.10716e-10	-2.62336		FZD7	7.67617e-07	2.25929		Ddx60	1.57776e-07	2.9134
C10orf82	chromosome 10 open reading frame 82					Hsd17b1	2.26809e-08	4.04155		ISG20	1.07531e-06	4.64441		Fjx1	6.15017e-05	-2.48943		Celsr3	9.25481e-05	2.28309		Fam167a	0.000116319	2.19051		Dner	1.45433e-08	5.67786
C11orf52	chromosome 11 open reading frame 52					ICAM1	5.70333e-06	2.84291		ITGBL1	2.40129e-13	4.87904		GAL	3.08223e-05	-2.68675		Cenpq	4.57486e-09	2.17262		Fam46b	7.85139e-07	-2.21919		Dtx4	9.82742e-05	-2.02993
C11orf70	chromosome 11 open reading frame 70					IFI16	1.76603e-05	2.26199		Ifit3	1.6868e-05	3.6545		GALNT12	1.64858e-07	3.01129		Cnpy4	1.17169e-11	-2.58288		Fap	0.0035957	2.0183		Dyx1c1	3.84759e-06	-2.01867
C12orf59	chromosome 12 open reading frame 59					IFI27	9.63225e-18	62.6586		Ifitm1	1.84923e-07	7.14534		GBP1	5.08919e-05	2.46483		Cnrip1	0.000909093	2.62343		Fbn2	0.000879413	2.17455		EEF1A1P24	1.60754e-07	2.06361
C15orf48	chromosome 15 open reading frame 48					IFI35	6.06113e-05	2.27519		Isl1	2.98553e-05	-2.64415		GBP2	0.000233163	2.24719		DDIT3	1.49574e-09	2.80459		Fst	0.000108639	2.4228		EMR2	0.000243072	2.12567
C17orf103	chromosome 17 open reading frame 103					IFI44	1.1173e-07	3.88018		Krt23	2.36854e-06	6.88819		GBP3	1.56076e-05	2.12561		DDX58	1.96613e-06	2.92808		G0s2	5.87864e-05	2.72228		EPB41L1	1.63879e-06	-2.32105
C17orf60	chromosome 17 open reading frame 60					IFI6	2.22932e-08	8.48017		LAMP3	1.15805e-05	4.02551		GDA	3.35759e-08	6.20012		DEPDC7	5.76062e-09	-2.48139		GALNT12	4.22445e-05	2.09839		EPB41L4A	4.42688e-11	-6.26359
C17orf91	chromosome 17 open reading frame 91					IFIH1	9.0125e-06	3.21328		LAP3	1.62551e-06	2.12945		GIPC2	1.32722e-05	2.6641		DFFB	2.63046e-08	-2.10096		GBP1	0.000140293	2.28414		EPS8L1	9.88608e-06	-2.13772
C19orf46	chromosome 19 open reading frame 46					IFIT1	9.74269e-07	4.20025		LAYN	5.15737e-06	2.45121		GNAZ	4.76887e-05	2.26536		DHCR7	1.92408e-08	-2.18975		GCNT2	8.14879e-14	8.30134		ETS1	0.000115939	2.05486
C1orf116	chromosome 1 open reading frame 116					IGFL1	9.71389e-11	4.29033		LIPG	0.00219396	2.18401		GPNMB	1.16307e-07	3.60744		DKK1	2.61057e-07	-2.51566		GDA	1.10816e-10	12.5691		Ecm1	1.141e-07	2.99795
C1orf133	chromosome 1 open reading frame 133					IL12RB1	7.39079e-06	2.0555		LOC440335	3.58713e-07	4.86282		GSTM3	4.91534e-08	2.5449		DLEU1	2.16197e-07	-2.55782		GJA1	0.000101558	2.66804		Egr1	0.000353937	-2.5171
C1orf213	chromosome 1 open reading frame 213					IL22RA1	0.00195248	2.02603		LOC645638	8.2413e-05	2.78679		Gdf15	2.3994e-05	3.50536		DLGAP5	5.16589e-06	-2.34992		GLIPR1	0.000135996	2.36808		Enc1	3.47502e-08	2.22319
C1orf38	chromosome 1 open reading frame 38					IL32	8.68665e-07	3.33121		LRG1	2.96113e-06	3.53803		Gja5	5.01867e-07	2.38773		DPP3	7.55304e-10	-2.03999		GLUL	3.31911e-09	-2.08609		Epdr1	2.0665e-09	2.60044
C1orf63	chromosome 1 open reading frame 63					IL6	0.000455086	4.20429		LY6D	1.09672e-09	3.64232		Gldc	0.00453662	2.00238		DRAM1	2.00742e-09	2.18389		GOLGA8A	0.00795699	2.37686		Ephx2	7.87507e-07	-3.57758
C1r	complement component 1, r subcomponent					IRF7	1.61431e-05	2.35383		MFAP2	3.54098e-05	2.68952		H19	1.23952e-07	11.9955		Dbndd1	6.10896e-07	-2.4908		GPNMB	0.000337151	2.01475		FAT3	4.65192e-05	-2.7515
C1s	complement component 1, s subcomponent					IRF9	1.44058e-08	3.25505		Maff	1.22771e-08	2.4131		HERC5	1.76845e-13	6.78841		Ddx60	5.64868e-10	4.45004		GPR158	1.95132e-17	13.1384		FGFR2	1.57021e-05	-3.61897
C20orf199	chromosome 20 open reading frame 199					ISG15	9.08528e-09	5.99235		NCCRP1	2.01265e-07	7.27171		HLA-B	3.48899e-08	2.41613		Dhrs2	1.56702e-10	6.23699		GRAMD4	1.14858e-09	-2.37287		FHOD3	2.10302e-06	2.00748
C21orf91	chromosome 21 open reading frame 91					ISG20	2.47469e-07	5.4341		NLRC5	4.23382e-07	2.78433		HLA-DMB	0.00126609	2.10622		Dnase1l1	6.57292e-09	-2.10172		GRB10	3.35734e-10	2.79647		FLJ44342	0.0012605	2.31743
C2orf54	chromosome 2 open reading frame 54					ITGBL1	1.18478e-13	5.17187		NME5	5.87485e-05	-2.02476		HLA-DRA	2.54952e-06	4.21816		EDN1	0.000592343	2.08217		GREM1	1.14281e-07	8.58818		FOSL1	4.73159e-05	2.82888
C3	complement component 3					Ifit3	1.34621e-05	3.73892		OAS1	6.37846e-07	5.828		HLA-F	1.94382e-07	2.78375		EFNA1	5.29224e-05	2.00277		GTSF1	1.53765e-16	60.0526		FREM2	4.62509e-07	-5.46818
C4orf19	chromosome 4 open reading frame 19					Ifitm1	6.28772e-08	8.203		OASL	5.4339e-06	3.73294		HRASLS2	4.66292e-07	3.58689		EFNB2	1.02575e-10	-2.04158		Gldc	0.00128121	2.25214		FRMD6	2.72076e-05	2.1922
C4orf26	chromosome 4 open reading frame 26					Ifne	0.000700011	-2.29261		OPTN	5.96644e-09	2.09409		HSD17B11	1.71495e-09	2.97333		EIF4EBP1	2.52855e-07	2.36035		Glis3	8.44712e-06	2.11812		FZD7	9.7694e-07	2.22974
C6orf105	chromosome 6 open reading frame 105					Isl1	0.00104593	-2.00909		Oas3	1.08572e-08	3.20978		Heca	4.3551e-09	2.04242		ELMO3	1.5926e-05	-2.58389		Gprc5b	5.82158e-09	2.81458		Fam167a	2.75357e-07	3.42412
C6orf129	chromosome 6 open reading frame 129					KDELR3	5.48854e-07	2.04438		Ostalpha	2.06208e-05	3.10816		Hsd17b1	5.24318e-09	4.58666		ELOVL4	1.3623e-06	2.17168		H19	0.000103955	4.56822		Fam38b	0.000351116	-2.09372
C7orf40	chromosome 7 open reading frame 40					Krt23	1.91178e-05	5.22093		P2ry6	1.03097e-07	2.2076		ICAM1	2.90698e-08	4.3987		EPHA2	2.58753e-05	2.2235		HBEGF	0.000161168	2.42673		Fam46b	3.73238e-08	-2.63389
C8orf4	chromosome 8 open reading frame 4					LAMP3	5.73977e-06	4.33963		PARP14	2.24712e-07	2.52633		IFI16	1.22735e-05	2.31532		EPSTI1	2.58855e-05	2.36101		HCFC1R1	6.44663e-05	-2.05467		Fap	0.00123729	2.22383
C9orf116	chromosome 9 open reading frame 116					LGR6	0.000490312	2.0077		PARP9	7.56794e-08	2.78605		IFI27	4.53527e-18	73.1808		ETV5	2.37663e-08	2.30442		HCLS1	3.16648e-13	10.4092		Fbn2	0.00047746	2.28897
C9orf167	chromosome 9 open reading frame 167					LOC100128288	0.000230978	-2.17124		PI3	6.61108e-06	5.98913		IFI44	1.084e-07	3.89022		Ehd2	2.74239e-11	-2.8596		HEG1	4.81966e-08	2.02869		Fjx1	0.000728344	2.05957
C9orf91	chromosome 9 open reading frame 91					LOC100129637	1.80249e-05	-2.09157		PLAT	6.88525e-07	3.57031		IFI6	1.895e-07	6.50183		FAM129A	1.05209e-09	4.11216		HERC5	1.12016e-10	3.91118		Fst	6.97111e-05	2.50876
CALB2	calbindin 2					LOC440335	1.66011e-07	5.27113		PP14571	0.00016651	2.01528		IFIH1	0.000315851	2.37161		FAM189B	1.76772e-15	-2.06409		HEY1	8.82339e-05	2.02681		G0s2	8.74028e-08	4.92238
CAMK2D	calcium/calmodulin-dependent protein ki					LOC643008	0.000678067	2.15865		PPM1N	2.29195e-07	2.36938		IFIT1	0.000323329	2.46926		FAM24B	2.35431e-07	2.30065		HIST1H3H	1.03928e-07	-2.48825		G6PD	1.10716e-08	-2.41193
CAPN1	calpain 1, (mu/I) large subunit					LRG1	7.90021e-08	4.98644		PSD3	4.97202e-10	2.04533		IGDCC4	5.13716e-07	2.44309		FAM83D	2.62948e-07	-2.16922		HKDC1	2.60916e-11	2.93718		GADD45A	5.53559e-05	2.21593
CAPS	calcyphosine					LY6D	9.06869e-10	3.69344		PSG9	8.62778e-10	3.24615		IGFL1	1.53713e-09	3.48739		FANK1	3.05176e-07	-2.71358		HSD11B1	1.46624e-10	13.3266		GDA	2.17356e-10	11.4675
CASP1	caspase 1, apoptosis-related cysteine p					LY6G6C	0.000820549	2.18957		Plbd1	1.64302e-06	2.46835		IL1F5	0.000202975	2.14054		FBLN7	3.18002e-06	2.9465		HSD17B8	7.40591e-06	-2.04733		GJA1	2.54703e-06	3.70477
CATSPER1	cation channel, sperm associated 1					MFAP2	2.50877e-08	5.10296		Plxnd1	5.09403e-11	2.75884		IL32	4.37076e-09	5.32339		FGF2	4.69898e-06	2.43998		Htr2b	0.000826478	2.66488		GLIPR1	3.94972e-06	3.14052
CCL20	chemokine (C-C motif) ligand 20					MGC16121	0.00161751	-2.08039		Ptger4	3.59084e-05	-2.13882		IL6	0.00136035	3.58664		FGFBP1	3.47512e-10	-4.92173		ICAM1	5.30536e-09	5.14893		GLUL	2.99435e-11	-2.59791
CCL22	chemokine (C-C motif) ligand 22					MT1M	3.12377e-05	2.73866		RSAD2	4.55684e-07	7.64377		IPO4	2.09086e-09	-2.61902		FGFR2	0.000779648	-2.47326		IFI27	8.23968e-14	13.9696		GNB4	2.47883e-08	2.60858
CCL28	chemokine (C-C motif) ligand 28					MUC20	0.00172619	2.181		Rec8	0.00122561	2.41283		IRF7	8.22002e-05	2.11516		FLJ44342	0.000970716	2.37559		IFI44	0.000234064	2.14855		GNG11	1.20894e-06	2.29644
CCL5	chemokine (C-C motif) ligand 5					Maff	2.37387e-07	2.08282		S100A8	9.53558e-06	6.86234		IRF9	6.02962e-08	2.95068		FOSL1	0.000160654	2.54659		IL11	0.00101649	2.10386		GOLGA8A	0.00615733	2.457
CCNA1	cyclin A1					Mdk	2.06809e-07	2.25116		S100A9	0.000115782	2.89651		ISG15	5.08344e-07	4.0306		FREM2	0.00625559	-2.05565		IL1B	5.34788e-05	5.00746		GPNMB	1.88844e-05	2.46025
CCNB1IP1	cyclin B1 interacting protein 1					Mlph	2.18831e-06	-2.05018		S100a4	5.13791e-09	3.25094		ISG20	7.67838e-07	4.81179		FZD7	1.33206e-07	2.49326		IL32	7.27387e-08	4.10702		GPX4	4.68983e-07	-2.37243
CCPG1	cell cycle progression 1					NCCRP1	5.73442e-08	8.55911		SCEL	1.29987e-05	2.73323		ITGBL1	6.44678e-13	4.51066		Fadd	5.9217e-08	-2.04744		IL6	8.54264e-06	7.544		GRAMD4	3.83197e-11	-2.83508
CD302	lymphocyte antigen 75					NME5	4.13418e-06	-2.38079		SERPINA1	3.50642e-07	3.53362		Ifit3	0.000601235	2.56756		Fam117a	1.85567e-07	-2.36891		IL8	0.000367645	5.59514		GRTP1	0.000271999	-2.30016
CD40	CD40 molecule, TNF receptor superfamily					OAS1	2.77001e-06	4.92023		SH2B3	7.66785e-07	2.12087		Ifitm1	9.0963e-08	7.82009		Fam167a	1.99223e-07	3.5141		IRAK2	6.97591e-08	2.73785		GSTA4	2.51892e-06	-2.30928
CD44	CD44 molecule (Indian blood group)					OASL	7.95924e-07	4.51396		SLC1A3	0.000227441	2.98433		Inhbb	9.05491e-06	2.38376		Fbxo16	8.14549e-08	-2.26466		IRS1	7.13308e-08	2.66287		Gabre	0.000999371	-2.56317
CD74	CD74 molecule, major histocompatibility					ORAOV1	7.59845e-09	-2.09082		SLCO2A1	0.000258608	2.25116		Isl1	2.1356e-05	-2.71485		Fut1	3.21243e-08	3.32438		ISG20	0.00107406	2.3625		Gldc	0.00314265	2.07258
CD82	CD82 molecule					Oas3	7.81055e-08	2.8141		SPRY1	3.97753e-05	2.5561		KLHL24	2.09185e-07	2.41657		G0s2	7.44546e-07	4.00504		ITGA2	0.000625386	2.01938		Glis3	2.41246e-06	2.27523
CD83	CD83 molecule					Ostalpha	2.8171e-06	3.72797		SPRY4	7.42665e-05	2.41125		KRT5	4.741e-05	-2.45899		G6PD	6.16672e-09	-2.48747		ITGB2	1.06325e-08	3.1962		HBEGF	1.09623e-05	3.02877
CDH2	cadherin 2, type 1, N-cadherin (neurona					P2ry6	6.13918e-10	2.91908		SSBP2	8.60504e-07	-2.14229		Krt23	4.28305e-06	6.35889		GADD45A	8.03278e-08	3.54849		ITGBL1	2.20666e-15	7.4527		HCFC1R1	7.8461e-06	-2.34299
CDKN1A	cyclin-dependent kinase inhibitor 1A (p					PARP14	1.27274e-06	2.28418		STAT1	5.04059e-07	2.36991		LAMP3	1.091e-05	4.05112		GJA1	0.000459874	2.34282		Inhbb	4.53624e-05	2.14881		HERC5	3.1148e-10	3.63033
CEACAM1	carcinoembryonic antigen-related cell a					PARP9	2.29501e-07	2.5991		Sat1	7.88733e-09	2.64687		LAYN	8.89383e-07	2.75758		GNAZ	1.92119e-05	2.41122		Isl1	6.11634e-07	-3.63543		HHLA3	6.45816e-05	-2.13383
CEBPG	CCAAT/enhancer binding protein (C/EBP),					PDSS1	0.000230435	-2.0762		Slc15a1	2.90206e-08	3.62584		LOC440335	1.40737e-07	5.3644		GNG11	2.70489e-06	2.19464		JAG1	1.02487e-06	2.70128		HIST1H3H	9.01622e-09	-2.87932
CETN2	centrin, EF-hand protein, 2					PI3	0.00108546	3.12204		Slc29a3	0.000126685	-2.07379		LOC645638	3.3774e-06	3.72957		GOLGA8A	0.00323558	2.66692		KIAA0754	0.000545912	2.78059		HRK	1.6837e-07	-2.74793
CFB	complement factor B					PILRB	0.00278612	-2.06968		Sts	0.000382986	2.1362		LOC729970	3.2982e-07	2.18279		GPCPD1	8.31317e-10	3.05668		KIAA1274	0.000113872	2.14172		HSD17B8	3.557e-07	-2.42269
CHAC1	ChaC, cation transport regulator homolo					PLAT	2.73036e-06	3.18191		TMEM140	2.06144e-05	2.98911		LRG1	4.52519e-08	5.27525		GPNMB	8.66519e-05	2.21199		KIF26A	8.77416e-06	-2.13921		HSPB8	1.2442e-06	2.03723
CHKB	carnitine palmitoyltransferase 1B (musc					PON3	0.000167013	2.03778		TMEM154	9.41441e-06	2.03803		LTB	0.000186982	2.73971		GPS1	5.14604e-11	-2.18419		KLHDC7B	1.11212e-05	2.92169		Htr2b	0.000742449	2.69514
CHML	choroideremia-like (Rab escort protein					PP14571	4.54633e-05	2.19183		TMEM45A	2.68427e-05	2.62638		LXN	8.32573e-06	-2.01299		GTSE1	1.83328e-14	-2.50995		KLK5	1.03127e-05	-2.20654		ICAM1	5.59829e-09	5.12261
CHSY1	chondroitin sulfate synthase 1					PPARG	5.87511e-07	-2.47485		TMPRSS3	5.1413e-06	2.75146		LY6D	1.23921e-06	2.31386		GYPC	0.000423134	2.1438		KLK7	5.37052e-06	-3.56487		ID2	8.91257e-08	-2.9558
CKB	creatine kinase, brain					PPM1N	1.32027e-08	2.79793		TNFAIP3	0.00133048	2.54755		MAP3K8	0.000779498	2.04231		Gabre	9.54251e-06	-4.16501		KRT13	0.00011314	-3.004		IFI16	4.49707e-05	2.13203
CLDN1	claudin 1					PRKAR1B	6.85781e-07	-2.40475		TNFRSF1B	0.00268112	2.15874		MFAP2	9.35924e-07	3.64774		Glis3	1.13992e-06	2.37732		Klf4	9.39677e-06	2.22639		IFI27	1.89064e-13	12.522
CLDN3	claudin 3					PSG9	7.04574e-08	2.48068		TXNIP	6.51691e-06	2.27936		MGAT4A	8.11881e-07	2.00161		H19	2.60991e-06	7.5987		Krt15	0.0002378	-2.28911		IFI44	0.000543541	2.02167
CMPK2	cytidine monophosphate (UMP-CMP) kinase					PTPLAD2	0.00133981	2.0228		ULBP2	1.52031e-07	2.16282		MMP14	9.39793e-07	2.01817		HACE1	1.60651e-07	2.03583		Krt23	6.01e-05	4.50583		IL11	0.000110982	2.52123
COL13A1	collagen, type XIII, alpha 1					Plbd1	8.66519e-07	2.57021		Uba7	0.000119498	2.01511		MUC20	0.00275205	2.08923		HBEGF	6.03517e-06	3.18606		LAPTM5	2.11517e-08	6.48666		IL23A	0.00176588	2.25918
COL1A1	collagen, type I, alpha 1					Plxnd1	4.24403e-09	2.20977		XAF1	1.49224e-10	13.4864		MXI1	3.51071e-07	2.00253		HIST1H2AL	5.07533e-08	-2.64067		LAYN	2.53163e-08	3.56939		IL32	3.41182e-08	4.39306
COL4A5	collagen, type IV, alpha 5					Ptger4	0.000102192	-2.00513		ZC3H12C	9.88705e-07	2.01479		MYL9	9.55861e-06	2.04656		HIST1H2BD	1.36205e-07	-2.68395		LCAT	0.0014945	2.01794		IL6	5.73838e-08	16.9774
COMMD9	COMM domain containing 9					RSAD2	2.52562e-08	11.4758		ZG16B	0.000258948	2.04862		Maff	6.11455e-09	2.50384		HIST1H2BG	1.8864e-05	-2.23166		LEPREL1	9.44755e-10	2.06166		IL8	1.76395e-05	9.42913
COMT	catechol-O-methyltransferase					Rhov	0.0080756	2.078		ZNF469	0.000606397	-2.30621		Mdk	5.84402e-08	2.40757		HIST2H2BE	3.04067e-06	-2.59356		LIF	1.59809e-06	3.07774		IRAK2	5.26935e-08	2.78653
CRABP1	cellular retinoic acid binding protein					S100A1	5.43081e-07	2.06557		abca4	8.75231e-06	2.70308		NCCRP1	6.22143e-07	6.31483		HLA-B	3.93021e-09	2.72967		LIPG	4.06744e-05	3.17936		IRS1	7.41608e-08	2.65658
CREB5	cAMP responsive element binding protein					S100A8	4.30671e-05	5.52873		acta2	0.000237544	2.00862		NFKBIA	5.63548e-05	2.09932		HLA-DRA	2.48164e-07	5.38821		LOC100128098	1.28324e-12	6.58206		ISG20	0.000211707	2.75645
CRELD2	cysteine-rich with EGF-like domains 2					S100A9	0.000805982	2.41216		agt	3.09455e-07	4.12165		NLRC5	1.92981e-06	2.51949		HLA-E	1.11413e-06	2.05516		LOC100128288	0.000297535	-2.13138		ITGA2	4.76308e-05	2.44013
CRIP2	cysteine-rich protein 2					S100a4	1.06503e-07	2.66918		apod	1.17559e-06	5.30619		NME5	1.40048e-05	-2.20768		HLA-F	2.36331e-08	3.21192		LOC100131015	0.00621388	2.01525		ITGA5	4.18662e-06	2.30049
CRISPLD1	cysteine-rich secretory protein LCCL do					SDR16C5	7.47744e-06	2.0314		dusp6	0.00080268	2.31738		OAS1	9.58943e-06	4.28451		HOXA4	2.92659e-05	-2.71742		LOC284620	1.64689e-11	6.34253		ITGBL1	6.75764e-16	8.41815
CRISPLD2	cysteine-rich secretory protein LCCL do					SELM	1.99189e-06	2.1644		hcp5	7.88164e-06	2.85255		OASL	1.64107e-06	4.19748		HOXA5	1.71331e-09	-3.98022		LOC440335	0.00133855	2.2318		Ier3	9.36202e-07	2.19182
CROT	carnitine O-octanoyltransferase					SERPINA1	6.37608e-08	4.08265		herc6	1.45742e-06	2.38546		OLFML2A	6.47692e-08	2.58819		HOXA7	2.93707e-06	-2.23018		LOC645638	0.000880763	2.26086		Isl1	7.26492e-08	-4.39362
CSAD	cysteine sulfinic acid decarboxylase					SLC2A10	9.10902e-06	2.22533		hla-dpa1	7.29223e-07	3.52287		OPTN	9.50945e-09	2.05273		HOXC10	0.000131432	-2.01252		LOC729538	2.17462e-08	2.23974		JAG1	2.33002e-08	3.54267
CSGALNACT1	chondroitin sulfate N-acetylgalactosami					SP110	3.06756e-05	2.05862		id1	3.2954e-06	-2.42119		OSR2	1.73649e-07	-2.15666		HOXC13	1.24287e-08	-2.34952		LRG1	1.58836e-05	3.05077		KAT2B	6.37169e-08	-2.10574
CSRP2	cysteine and glycine-rich protein 2					SPRY1	0.000219565	2.24302		loxl1	3.04943e-05	2.31056		Oas3	2.3366e-07	2.62552		HPDL	5.98438e-09	-3.13552		LRP8	6.06485e-06	2.01983		KIAA0754	9.39361e-05	3.34617
CTH	cystathionase (cystathionine gamma-lyas					STAT1	4.41392e-07	2.38798		map2	9.78139e-06	-2.01928		Osr1	0.00485341	-2.21006		HSPA1B	1.11995e-07	-2.32054		LTB	5.40052e-05	3.07857		KIAA1274	6.9268e-06	2.59866
CTHRC1	collagen triple helix repeat containing					STEAP4	0.00126702	2.07096		mx1	3.7356e-09	7.02495		Ostalpha	3.80648e-07	4.51791		Heca	1.3507e-09	2.14628		LTBP2	0.000437979	2.19155		KIF26A	6.30518e-09	-3.38437
CTSH	cathepsin H					Serpini1	6.98016e-05	2.21554		nupr1	5.62473e-05	2.39413		PARP14	8.62547e-07	2.33538		Hoxc6	1.9769e-05	-2.03744		LXN	1.53688e-06	-2.20334		KLK5	3.10019e-09	-3.81313
CTSL2	cathepsin L2					Slc15a1	3.17886e-09	4.33972		plscr1	3.60704e-09	2.76536		PARP9	8.27571e-07	2.40559		ICAM1	6.966e-11	8.0784		LY96	6.19107e-07	4.28543		KLK6	0.000659067	-2.06391
CXCL1	chemokine (C-X-C motif) ligand 1 (melan					Smyd3	7.37192e-07	-2.11323		pstpip2	1.84057e-07	2.30283		PI3	5.85737e-06	6.0861		IDI1	2.09894e-08	-2.28222		Lamb3	0.000101247	2.34712		KLK7	4.29437e-10	-9.87578
CXCL2	chemokine (C-X-C motif) ligand 2					Sts	0.000299493	2.17607		rarres3	8.22659e-07	3.62979		PIK3CD	3.08227e-10	2.02668		IFI16	5.56382e-05	2.10374		Ldlr	9.0369e-07	2.3091		KRT13	1.82028e-08	-7.68507
CXXC5	CXXC finger 5					TGFB2	4.33273e-06	-2.25992		snai2	0.000134517	-2.09827		PLAT	0.000295903	2.20296		IFI44	1.29866e-05	2.65645		Lrch1	0.00150329	2.68819		KRT5	7.97928e-05	-2.36519
CYGB	cytoglobin					TLR3	0.00597941	2.14206		stc1	0.00302002	2.28382		PPARG	1.64955e-05	-2.04137		IFI6	1.58651e-05	3.94927		MACF1	3.37399e-06	2.17277		Klf4	1.32276e-05	2.18106
CYLD	cylindromatosis (turban tumor syndrome)					TMEM140	7.7745e-08	5.01006		thbs2	4.88287e-05	2.83352		PPM1N	7.65446e-08	2.52092		IFIH1	8.36635e-05	2.65242		MAP1B	2.03717e-06	3.22445		Krt15	5.6513e-06	-3.08891
CYP27B1	cytochrome P450, family 27, subfamily B					TMEM45A	5.40845e-06	2.97906						PQLC3	1.13359e-06	2.44067		IFT122	4.56251e-07	-2.15025		MAP3K8	5.05989e-05	2.51688		LAMC2	4.53376e-05	2.74071
Camta2	calmodulin binding transcription activa					TMPRSS3	4.39943e-07	3.31968						PRKAR1B	2.44084e-06	-2.23485		IGDCC4	3.8999e-09	3.34123		MB	2.74408e-09	-4.458		LARGE	2.26584e-07	-2.2483
Card6	caspase recruitment domain family, memb					TNFRSF1B	0.0002205	2.73691						PSD3	1.8916e-11	2.35143		IL32	3.50428e-11	8.91192		MDP1	1.20974e-09	-2.00441		LAYN	5.99176e-09	3.99908
Ccdc80	coiled-coil domain containing 80					TNFSF10	0.000209523	4.20654						PSG9	4.14022e-08	2.55691		IL6	4.78854e-10	42.3209		MESP1	0.000169136	-2.0684		LIF	6.01142e-06	2.78086
Ccl2	chemokine (C-C motif) ligand 2					TNNI2	2.10127e-07	-3.63461						PTPLAD2	0.000690023	2.13306		IL6ST	2.04463e-06	2.09858		METTL7B	0.00183975	-2.13313		LIPG	1.68262e-05	3.46062
Ccnl2	cyclin L2					TP53INP2	1.56039e-09	2.15747						PXDN	2.40443e-08	3.21938		IL8	3.09319e-06	12.8686		MICAL2	1.45918e-06	2.0433		LOC100128288	7.19181e-06	-2.81324
Cd52	CD52 molecule					TRIM52	0.00271674	-2.02358						Plbd1	4.50571e-08	3.13081		IMP3	2.34378e-09	-2.72939		MPP3	0.00143397	2.17046		LOC100133690	2.72571e-07	2.06648
Cd55	CD55 molecule, decay accelerating facto					TRPV1	0.00112072	-2.09401						Plxnd1	1.50622e-11	2.95432		INPP4B	2.68396e-08	-2.29351		MUC4	3.29822e-14	23.784		LOC126987	0.000447078	-2.02801
Cdca2	cell division cycle associated 2					TTC18	6.5776e-05	-2.05061						Ppt2	2.4843e-10	-2.28164		INSIG1	1.00428e-08	-2.82382		MYH15	3.43897e-06	3.41204		LOC282997	0.00015449	-2.03197
Ceacam6	carcinoembryonic antigen-related cell a					Thbs1	0.00072045	-2.30139						Ptger4	8.95934e-07	-2.71425		IRAK2	1.9599e-09	3.47367		Maff	5.08939e-09	2.5287		LOC729538	2.14804e-09	2.51823
Celsr3	cadherin, EGF LAG seven-pass G-type rec					Tmem173	4.47105e-06	2.28056						RALGPS1	0.000338419	2.03446		IRF9	3.13012e-07	2.6506		Magee1	1.62981e-05	2.07099		LOC729859	1.22632e-06	-2.05188
Cenpq	centromere protein Q					Trmt1	1.5016e-07	-2.04124						RARRES2	8.76249e-05	2.39303		IRS1	9.80043e-10	3.52966		Mmp9	1.18496e-06	3.19085		LTB	2.49245e-06	4.15132
Chac2	ChaC, cation transport regulator homolo					Tsen2	4.48249e-05	-2.01406						RASSF2	4.0115e-08	3.79309		ISG15	1.3384e-06	3.69072		NCCRP1	0.000650939	2.85608		LTBP2	2.71048e-05	2.7335
Cnpy4	canopy 4 homolog (zebrafish)					UCP2	4.33315e-07	2.33993						RBP7	1.46121e-06	2.4435		ITGBL1	1.2276e-11	3.63722		NFE2L3	3.59576e-06	2.3887		LXN	5.66199e-10	-3.60434
Cnrip1	cannabinoid receptor interacting protei					ULBP2	3.57269e-09	2.63159						RHBG	1.67493e-06	2.20827		ITPRIP	1.96419e-07	2.58845		NFKBIA	5.80053e-05	2.09554		Lamb3	6.73069e-06	2.88931
Coch	coagulation factor C homolog, cochlin (					VTCN1	0.0039818	2.25206						RNF213	3.4853e-07	2.1896		Id3	4.9806e-09	-2.79253		NLRC5	2.76131e-06	2.46218		Ldlr	3.25088e-06	2.15031
Col4a1	collagen, type IV, alpha 1					WNK4	6.72221e-05	-2.07998						RSAD2	1.76693e-06	6.39583		Ier3	1.19663e-07	2.45354		NME5	9.61642e-08	-3.05243		Loxl4	0.000901112	-2.01282
Col6a3	collagen, type VI, alpha 3					XAF1	1.60355e-09	9.7664						Rbp1	4.44652e-06	2.98492		Ifit3	0.00496358	2.08315		NOVA1	2.05431e-08	-2.28185		Lpxn	1.13721e-06	2.31559
Crat	carnitine acetyltransferase					ZG16B	0.000148117	2.12856						Rec8	0.00333458	2.18305		Ifitm1	1.50124e-05	4.24909		NT5E	1.09749e-06	2.3603		Lrch1	0.00579532	2.29917
Cxcl6	chemokine (C-X-C motif) ligand 6 (granu					ZNF354A	5.44781e-09	-2.07667						Rhebl1	1.21336e-07	2.12026		Irf1	6.27623e-10	2.79203		NUAK1	2.74204e-07	2.08699		MACF1	4.60967e-06	2.13556
Cyp11a1	cytochrome P450, family 11, subfamily A					ZNF469	0.00117995	-2.1765						Rhov	0.00498767	2.19018		KIAA0355	2.15027e-09	2.22017		Npm2	7.1137e-06	-2.1054		MAMDC2	0.00326872	-2.06692
Cyp24a1	cytochrome P450, family 24, subfamily A					ZNF488	0.000225048	-2.17276						S100A1	1.39345e-08	2.49044		KIAA1274	3.63139e-06	2.72128		Nynrin	5.55766e-06	-2.24229		MAP1B	3.39083e-08	4.60633
DCAF4L1	WD repeat domain 21B					ZNF692	3.93716e-06	-2.63846						S100A8	2.78576e-05	5.88151		KIF14	0.000505746	-2.03613		OASL	0.000704887	2.37567		MAP3K8	0.000273632	2.21174
DDIT3	DNA-damage-inducible transcript 3					ZNF767	6.45311e-05	-2.58313						S100A9	0.000107535	2.91685		KLF10	5.86225e-09	2.13144		Olr1	3.58199e-12	13.1393		MB	3.69865e-12	-8.53865
DDX58	DEAD (Asp-Glu-Ala-Asp) box polypeptide					ZNF789	0.000301902	-2.17753						S100a4	5.54903e-09	3.23384		KLHL29	7.14455e-07	2.47		Osr1	0.00672986	-2.13232		MDP1	3.87246e-10	-2.09847
DDX60L	DEAD (Asp-Glu-Ala-Asp) box polypeptide					Zg16	1.14404e-07	2.57358						SERPINA1	2.03354e-07	3.6974		KLK5	2.22187e-06	-2.4233		Ostalpha	0.000290343	2.46333		MEGF6	0.000276396	-2.21079
DEPDC7	DEP domain containing 7					abca4	1.62721e-05	2.58146						SLC12A7	4.53848e-05	2.05065		KLK6	0.000411122	-2.13917		PADI3	1.32706e-06	3.10564		MESP1	9.03827e-06	-2.52414
DFFB	DNA fragmentation factor, 40kDa, beta p					acss1	7.41148e-06	2.09349						SLC1A3	0.000372099	2.83675		KLK7	6.31926e-09	-7.13349		PDZK1IP1	8.2937e-07	10.2573		METTL7B	0.000285234	-2.51895
DHCR7	7-dehydrocholesterol reductase					agt	8.33822e-10	7.54012						SLC2A10	3.78504e-06	2.34742		KLK8	0.000239755	-2.29019		PI3	0.000419632	3.51911		MICAL2	1.03631e-07	2.33992
DKK1	dickkopf homolog 1 (Xenopus laevis)					aldoc	6.05182e-07	2.67975						SPRY1	5.48564e-06	2.98697		KRT13	4.32625e-09	-9.20265		PIH1D2	3.64862e-05	-2.17556		MOXD1	3.0097e-08	2.59118
DLEU1	deleted in lymphocytic leukemia 1 (non-					apod	2.2609e-08	8.56872						SPRY4	0.000253791	2.19812		KRT19	4.27498e-07	-2.13327		PIK3CD	9.57054e-11	2.12383		MPZ	0.00142983	2.14165
DLGAP5	discs, large (Drosophila) homolog-assoc					arhgef10	2.13882e-13	-2.97535						SULF2	3.91809e-06	2.64696		KRT5	2.69059e-07	-3.70346		PKP1	1.36258e-05	-2.00446		MUC20	0.000146978	-2.72945
DMBT1	deleted in malignant brain tumors 1					bhlhe40	4.2076e-06	2.06343						SYTL2	5.94633e-07	-2.04327		Krt15	3.70987e-06	-3.19904		PLAGL1	1.11076e-07	2.12497		Maff	7.73168e-08	2.19844
DNAJC22	DnaJ (Hsp40) homolog, subfamily C, memb					cdh5	0.000908868	2.04577						Sat1	5.19877e-10	3.118		LAMP3	9.73779e-08	6.90663		PLAT	1.19428e-05	2.82481		Mmp9	1.59625e-10	7.27198
DNAL4	dynein, axonemal, light chain 4					crip1	1.26992e-05	2.10449						Slc15a1	1.67355e-10	5.65046		LCP1	2.96109e-05	-2.23094		PLAU	1.03451e-06	2.82357		NCEH1	2.3419e-05	2.16277
DPP3	dipeptidyl-peptidase 3					hcp5	4.5679e-05	2.4916						St6galnac2	0.0006379	2.12123		LEPREL1	3.7621e-10	2.14202		PLAUR	1.54809e-07	3.18271		NFE2L3	3.48164e-07	2.77712
DRAM1	DNA-damage regulated autophagy modulato					herc6	3.13005e-06	2.27961						Susd3	2.45674e-07	3.01812		LIF	1.04686e-06	3.1814		PRR15L	2.93542e-05	-3.17483		NIPSNAP1	1.06607e-07	-2.26707
DUSP9	dual specificity phosphatase 9					hla-dpa1	3.51272e-07	3.74964						TMEM140	8.52799e-06	3.22809		LOC100128288	2.83897e-07	-3.64517		PSCA	0.00100099	-2.16515		NLRC5	3.8787e-05	2.08961
Dbndd1	dysbindin (dystrobrevin binding protein					hla-drb1	0.000308818	2.15736						TMEM45A	8.92719e-06	2.86265		LOC100133632	1.55836e-05	2.06792		PXDN	1.41387e-11	5.90508		NME5	3.89702e-08	-3.25458
Ddx60	DEAD (Asp-Glu-Ala-Asp) box polypeptide					id1	2.43511e-05	-2.13942						TMPRSS3	5.26784e-09	4.83624		LOC285943	2.19814e-07	-3.5993		Pear1	0.000146821	2.61283		NOVA1	1.91492e-08	-2.28982
Dhrs2	dehydrogenase/reductase (SDR family) me					ifit5	2.58192e-06	2.07996						TNFAIP3	0.000961668	2.63695		LOC644456	1.81856e-07	-2.20994		Pkib	5.23645e-05	2.12208		NRP1	6.75436e-06	2.03862
Dnase1l1	deoxyribonuclease I-like 1					lbh	1.38485e-06	2.8096						TNFRSF1B	0.000587493	2.49462		LOC648603	3.87544e-07	-2.17301		Plekhg4	2.3024e-06	2.39873		NT5E	1.39018e-09	3.65024
Dner	delta/notch-like EGF repeat containing					2010-03-03	0.000184035	-2.06442						TNFSF10	0.000233033	4.14682		LOC652522	6.32441e-08	2.03748		Plxnd1	6.42828e-10	2.41784		NUAK1	1.08706e-09	2.78939
Dtx4	deltex homolog 4 (Drosophila)					mx1	9.27145e-09	6.35141						TXNIP	4.75026e-09	3.71897		LOC729013	1.19234e-06	-2.13331		Prame	0.000326435	2.07996		NUAK2	2.57082e-07	2.40648
Dyx1c1	dyslexia susceptibility 1 candidate 1					ndrg1	0.000335552	2.34701						Thbs1	0.00011493	-2.70587		LONRF1	4.24878e-12	2.57747		Ptx3	1.19627e-07	15.3199		Npm2	2.26735e-06	-2.2448
EDN1	endothelin 1					phlda1	5.70042e-09	-2.28652						UCP2	5.10585e-07	2.3186		LPHN2	1.71854e-09	-2.30699		QPRT	9.57382e-07	3.87591		Nynrin	2.31765e-08	-3.18488
EEF1A1P24	eukaryotic translation elongation facto					plscr1	4.94704e-08	2.38776						ULBP2	6.45076e-08	2.25698		LXN	6.54057e-08	-2.63971		RAB26	0.000131612	-2.16961		PADI2	1.73787e-06	-2.06858
EFHC1	EF-hand domain (C-terminal) containing					prpH	1.13877e-05	2.13806						UPK3B	5.87966e-05	2.06712		LYPD3	2.28592e-07	-2.1069		RAP1GAP2	3.00891e-07	2.32439		PALM3	1.869e-06	-2.62483
EFHD1	EF-hand domain family, member D1					pstpip2	1.71892e-06	2.05222						Uba7	3.07992e-05	2.1949		Lamb3	1.32124e-05	2.74114		RPL23AP32	0.000307171	2.43836		PBX1	1.64354e-05	-2.46744
EFNA1	ephrin-A1					rarres3	1.5767e-06	3.43202						VTCN1	0.00327325	2.30009		Lcn2	0.000853148	2.74819		Rdm1	1.39107e-06	-2.68765		PDCD4	9.90899e-08	-2.08626
EFNB2	ephrin-B2					rtn2	2.84292e-05	2.10018						Vash2	1.54237e-05	2.51071		Loxl4	0.000715431	2.04837		Rec8	0.0050975	2.09096		PEG10	1.32343e-08	-2.04308
EGFLAM	EGF-like, fibronectin type III and lami					serpina3	0.00431281	3.35336						WNT5A	0.000361192	-2.15269		MAMDC2	4.1576e-05	-3.08969		Robo4	2.6104e-05	2.37206		PIH1D2	1.09609e-05	-2.35038
EIF4EBP1	eukaryotic translation initiation facto					sh3rf2	2.51334e-05	-2.08188						XAF1	2.65155e-09	9.15547		MATN3	4.23317e-06	2.18807		S100a3	9.01951e-07	2.02546		PIK3CD	6.76908e-12	2.38213
ELMO3	engulfment and cell motility 3					snai2	8.61883e-06	-2.52945						YBX2	0.000295941	2.48255		MB	5.57388e-06	-2.50637		S1PR1	0.000227989	3.76771		PIK3R3	1.50414e-07	-2.15555
ELOVL4	elongation of very long chain fatty aci					stc1	0.00306924	2.27993						ZC3H12C	3.13164e-07	2.13		MGP	0.000764269	-2.1261		SAA4	1.06172e-06	5.91934		PKP1	8.02544e-07	-2.34447
EMR1	egf-like module containing, mucin-like,					tm7sf2	5.66094e-05	2.52877						ZG16B	2.79828e-05	2.38893		MID1	5.29271e-15	-2.73994		SACS	1.09961e-06	2.52064		PLA2G10	0.000450227	-3.2667
EMR2	egf-like module containing, mucin-like,					upk2	4.89745e-05	2.32716						ZNF528	1.88105e-09	2.36999		MKI67	7.65223e-05	-2.23976		SALL2	3.39581e-06	-2.1783		PLAC2	2.62615e-05	-2.99972
EPB41L1	erythrocyte membrane protein band 4.1-l													abca4	4.68162e-07	3.39131		MLKL	2.42716e-06	-2.17685		SCARF1	8.06455e-07	3.62251		PLAGL1	5.16224e-09	2.47758
EPB41L4A	erythrocyte membrane protein band 4.1 l													acss1	3.35025e-07	2.49936		MMD	2.6095e-17	2.61807		SCEL	0.000267511	2.17541		PLAT	1.07278e-05	2.849
EPHA2	EPH receptor A2													acta2	7.7585e-06	2.52865		MOXD1	3.21993e-07	2.27163		SCG5	1.12213e-06	2.84575		PLAU	2.89847e-08	3.68676
EPS8L1	EPS8-like 1													agt	2.66442e-09	6.62701		MXI1	8.24189e-10	2.71663		SELENBP1	0.000605122	2.02501		PLAUR	4.84363e-08	3.47263
EPSTI1	epithelial stromal interaction 1 (breas													aldoc	5.30071e-05	2.02952		Maff	3.86349e-13	4.71681		SERPINE1	0.000606528	2.31567		PLCE1	5.3283e-05	-2.07493
ERP27	endoplasmic reticulum protein 27													apod	1.23593e-08	9.27303		Mcm5	4.77849e-09	-2.26728		SH2B3	2.86444e-07	2.23072		PLEKHG6	1.03347e-05	-2.4242
ETS1	v-ets erythroblastosis virus E26 oncoge													arrdc4	0.000519183	2.11042		Mdk	7.48875e-07	2.10801		SLC12A7	3.44527e-07	2.78608		PMAIP1	3.14304e-07	2.14806
ETV5	ets variant 5													c10orf140	0.000533971	-2.10701		NAMPT	9.0155e-09	3.1103		SLC15A3	5.82779e-07	4.53352		PRKCD	4.06978e-09	-2.12938
ETV7	ets variant 7													c14orf147	6.59032e-08	2.46155		NCAPD2	1.32217e-09	-2.01019		SLC16A4	1.28272e-05	2.84053		PROM1	6.40417e-05	-2.5181
Ecm1	extracellular matrix protein 1													cgnl1	8.88081e-08	2.66412		NCCRP1	5.60769e-05	3.74145		SLC1A3	0.000356424	2.84935		PRR15L	3.85362e-07	-4.84963
Egfl8	EGF-like-domain, multiple 8													cybrd1	4.66344e-07	2.15385		NCRNA00219	1.30575e-12	3.4075		SLC2A6	0.000261793	2.00406		PSCA	2.6219e-07	-4.49758
Egr1	early growth response 1													fam70a	0.000415422	2.0136		NFE2L3	1.94901e-05	2.15334		SLC35F3	2.46869e-06	2.29867		PTPN6	6.70372e-05	-2.13366
Ehd2	EH-domain containing 2													gjb2	3.08173e-06	2.51088		NFIL3	1.57425e-09	2.84705		SLC40A1	5.91344e-06	-2.29291		PXDN	2.62408e-12	6.96315
Enc1	ectodermal-neural cortex (with BTB-like													gne	4.23948e-09	2.01774		NFKBIA	5.81764e-06	2.42625		SLC7A7	5.01467e-06	2.29264		Pdgfb	1.43623e-05	2.03499
Enpp5	ectonucleotide pyrophosphatase/phosphod													hcp5	1.00508e-06	3.36543		NFKBIZ	5.38717e-05	2.291		SLCO2A1	1.23798e-06	3.45716		Pear1	0.00017683	2.57082
Epdr1	ependymin related protein 1 (zebrafish)													hla-dpa1	9.75633e-09	5.20675		NLRC5	1.33699e-05	2.23012		SLITRK5	0.00223001	-2.16449		Pkib	5.47619e-05	2.11609
Ephx2	epoxide hydrolase 2, cytoplasmic													hla-drb1	2.22203e-05	2.63069		NR1H3	1.21087e-06	-2.53347		SNCG	5.63982e-08	-3.20447		Plcd1	1.15593e-08	-2.81687
F2R	coagulation factor II (thrombin) recept													id1	3.12524e-05	-2.10736		NR2F2	4.66918e-05	-2.02308		SNORA61	0.00236886	2.10007		Plxnd1	1.78467e-08	2.0721
FAM113B	family with sequence similarity 113, me													igfbp3	0.000111259	-2.01482		NT5E	2.4032e-07	2.58497		SPHK1	9.80062e-09	2.45035		RAB15	1.84913e-08	-2.12273
FAM129A	family with sequence similarity 129, me													lbh	4.56105e-05	2.21323		NUAK2	3.35308e-09	3.13736		SPOCD1	5.07691e-08	4.95264		RAB20	6.69425e-06	-2.12199
FAM189B	family with sequence similarity 189, me													mx1	1.45136e-07	4.77231		NUDT16L1	2.03425e-09	-2.00837		SPOCK2	3.37366e-05	-2.46591		RAB26	4.70247e-07	-3.27735
FAM24B	family with sequence similarity 24, mem													ndrg1	3.24294e-05	2.8566		NUP62CL	3.8063e-05	2.02276		SPRY4	9.53459e-07	3.39882		RAI14	9.36437e-07	2.14884
FAM83D	family with sequence similarity 83, mem													nupr1	5.63567e-07	3.4134		Nmu	8.83337e-06	-2.02591		STEAP1	0.000124346	2.54185		RAP1GAP2	6.5069e-08	2.53315
FAM89A	family with sequence similarity 89, mem													pcbd2	5.14465e-08	-2.14767		Nynrin	8.46726e-08	-2.91523		SULF2	5.90874e-09	4.37675		RARRES2	3.45481e-06	-3.07965
FANK1	fibronectin type III and ankyrin repeat													pcsk9	2.02134e-07	2.67213		OAS1	0.00260693	2.35954		Sat1	9.43773e-10	3.00354		REEP6	1.16213e-06	-2.62437
FAT3	FAT tumor suppressor homolog 3 (Drosoph													plscr1	6.6489e-07	2.08973		OASL	3.56405e-06	3.88886		Sema3e	0.000560254	-2.14462		RGNEF	1.68837e-07	2.02246
FBLN2	fibulin 2													pmp22	1.82953e-06	2.42134		OPTN	3.25622e-11	2.68708		Serpinf1	1.59571e-08	4.99574		RSAD2	0.00988375	2.23604
FBLN7	fibulin 7													pstpip2	2.26107e-06	2.02441		OSBPL1A	3.28552e-10	-2.26706		Sfrp1	1.3015e-07	2.91796		RTN4RL1	1.40079e-05	-2.05191
FGF2	fibroblast growth factor 2 (basic)													rarres3	3.327e-07	3.93103		OSR2	3.11789e-08	-2.35186		Sh3bgr	2.05641e-09	-2.30031		Rab11fip4	6.02393e-06	-2.43937
FGFBP1	fibroblast growth factor binding protei													rtn2	3.11778e-05	2.08864		Oas3	1.24732e-06	2.3719		Slc15a1	1.37511e-05	2.34027		Rdm1	6.39863e-07	-2.83519
FGFR2	fibroblast growth factor receptor 2													serpina3	0.00428823	3.35649		PARP14	3.28728e-07	2.47		Slc29a3	2.97558e-06	-2.66925		Rhebl1	2.40249e-07	2.0534
FHOD3	formin homology 2 domain containing 3													stc1	0.00755332	2.07122		PARP8	8.66338e-11	2.27677		Spock1	2.82751e-08	2.78689		S1PR1	8.1648e-07	7.85494
FLJ44342	hypothetical LOC645460													thbs2	0.00102442	2.18126		PCYOX1	1.16457e-06	-2.22133		Syt7	2.16191e-06	-2.49524		SACS	8.11494e-08	2.99033
FOLR1	folate receptor 1 (adult)													tubb2b	2.69229e-05	2.15914		PEBP1	4.48032e-09	-2.13813		TCEA3	0.000436722	-2.11331		SALL2	3.76833e-06	-2.1657
FOSL1	FOS-like antigen 1																	PET112L	1.24783e-10	-2.5022		TFPI	2.00394e-18	14.31		SEMA3C	1.02335e-05	2.06977
FOXQ1	forkhead box Q1																	PEX11A	1.54782e-10	-2.49018		TLE2	0.00121144	-2.03173		SERPINB7	0.00260852	2.80279
FREM2	FRAS1 related extracellular matrix prot																	PGP	3.03472e-10	-2.24224		TLR2	2.68034e-05	2.06814		SERPINE1	2.61848e-06	3.76675
FRMD6	FERM domain containing 6																	PHLDB1	2.36484e-10	-2.13593		TMEM154	2.85388e-07	2.47971		SH2B3	2.99616e-07	2.22551
FZD7	frizzled homolog 7 (Drosophila)																	PI3	6.19375e-08	11.5811		TMEM22	5.75627e-06	2.27081		SH2D5	4.53969e-05	2.01072
Fadd	Fas (TNFRSF6)-associated via death doma																	PIK3C2B	1.13895e-08	-2.65731		TMEM27	2.30347e-10	6.24008		SLC12A7	2.14772e-06	2.47297
Fam113a	family with sequence similarity 113, me																	PIK3R3	5.44155e-08	-2.26706		TMEM92	1.88496e-05	2.00179		SLC1A3	4.31702e-05	3.54613
Fam117a	family with sequence similarity 117, me																	PIR	1.20875e-05	-2.11433		TNC	1.40568e-05	3.15866		SLC35F3	6.14052e-09	3.3827
Fam167a	family with sequence similarity 167, me																	PKP1	2.25023e-08	-2.91246		TNF	4.89408e-07	7.34865		SLC40A1	2.16811e-07	-2.83121
Fam38b	family with sequence similarity 38, mem																	PLAC2	4.55545e-06	-3.50893		TNFAIP3	2.67857e-06	4.98249		SLCO2A1	3.54568e-07	3.8522
Fam46b	family with sequence similarity 46, mem																	PLAC8	5.75281e-08	-2.15914		TNNI2	1.16953e-05	-2.6532		SMTNL2	0.00034821	-2.01498
Fap	fibroblast activation protein, alpha																	PLAU	8.44057e-10	4.96931		TNS4	7.55431e-07	2.60188		SMURF2	4.47752e-06	2.00912
Fbn2	fibrillin 2																	PLAUR	2.71784e-06	2.60035		TRANK1	2.13977e-06	2.7929		SNCG	4.67719e-10	-4.66709
Fbp1	fructose-1,6-bisphosphatase 1																	PLK1	9.42637e-15	-2.91088		TRIM55	3.81565e-12	11.3162		SNORA61	0.00177508	2.15595
Fbxo16	F-box protein 16																	PLLP	4.22711e-07	2.4327		TRIML2	1.27891e-05	2.35769		SP6	1.32968e-05	-2.33062
Fer1l4	fer-1-like 4 (C. elegans)																	PMAIP1	1.90104e-11	3.82854		TXNDC6	0.0044709	2.23756		SPAG4	2.47291e-06	-2.12975
Fjx1	four jointed box 1 (Drosophila)																	PNMAL1	2.42201e-08	-2.67687		Tgm1	0.000141269	-2.36666		SPHK1	1.03155e-08	2.44373
Fst	follistatin																	POLM	1.54397e-08	-2.3646		Tnfsf14	8.9034e-06	2.60383		SPOCD1	1.93831e-06	3.53025
Fut1	fucosyltransferase 1 (galactoside 2-alp																	PPARG	1.44818e-07	-2.69786		Tnip1	1.4848e-06	2.29839		SPOCK2	2.4007e-08	-4.41458
G0s2	G0/G1switch 2																	PPP2R1A	1.09175e-08	-2.15896		VILL	4.50928e-05	-2.02529		SPRY4	2.14748e-08	4.74587
G6PD	glucose-6-phosphate dehydrogenase																	PRKCD	9.27592e-11	-2.54517		VIM	1.13643e-05	3.76028		STEAP1	5.41167e-07	4.09299
GABRP	gamma-aminobutyric acid (GABA) A recept																	PSAT1	2.23321e-11	2.966		VSTM1	0.00146332	2.54481		STEAP4	0.000356555	-2.29782
GADD45A	growth arrest and DNA-damage-inducible,																	PSCA	0.000520996	-2.28831		Vgll1	5.55505e-09	-3.06209		STMN3	9.26424e-07	2.25856
GAL	galanin prepropeptide																	PTOV1	2.54794e-06	-2.03248		Vnn1	5.99705e-10	13.3204		SULF2	2.8926e-09	4.6586
GALNT12	UDP-N-acetyl-alpha-D-galactosamine:poly																	PTRF	2.80115e-12	-4.231		XAF1	0.000157567	2.81638		SULT2B1	1.50803e-05	-2.30081
GBP1	guanylate binding protein 1, interferon																	PXDN	5.86624e-11	5.1831		XDH	8.25136e-07	3.19315		SUSD5	0.000230843	2.25581
GBP2	guanylate binding protein 2, interferon																	Pdp1	1.34908e-06	2.09178		XG	9.87139e-12	13.5123		Sat1	3.25106e-09	2.78686
GBP3	guanylate binding protein 3																	Pepd	2.31686e-07	-2.27906		ZBTB1	4.30526e-06	2.28829		Sema3e	0.000489795	-2.16739
GCHFR	GTP cyclohydrolase I feedback regulator																	Ppp2r3a	9.3999e-09	-2.22626		ZC3H12C	2.50759e-10	3.17124		Sfrp1	7.85385e-09	3.56224
GCNT2	glucosaminyl (N-acetyl) transferase 2,																	Ppt2	1.34714e-13	-3.41117		ZFP82	9.45581e-09	2.26627		Slc29a3	4.96476e-09	-4.37035
GDA	guanine deaminase																	Psrc1	6.7646e-10	-2.72789		ZNF140	2.15508e-08	2.02636		Slc43a3	6.66362e-06	2.06405
GIP	gastric inhibitory polypeptide																	Pycr1	3.17847e-07	2.07096		ZNF44	1.82863e-07	2.22871		Spa17	2.4083e-06	-2.00982
GIPC2	GIPC PDZ domain containing family, memb																	QARS	2.65066e-10	-2.13069		ZNF528	1.31684e-09	2.41227		Spock1	7.83833e-10	3.53527
GJA1	gap junction protein, alpha 1, 43kDa																	RAB33B	1.85876e-09	2.19272		ZNF697	1.46774e-05	2.30574		Syt12	4.73737e-08	-4.1707
GLIPR1	GLI pathogenesis-related 1																	RAI14	5.7455e-08	2.49896		ZNF814	2.1546e-06	2.28007		Syt7	5.56118e-07	-2.72681
GLUL	glutamate-ammonia ligase (glutamine syn																	RAP1GAP2	1.3946e-07	2.42569		Znf608	0.000509271	-2.15386		TCEA3	2.07645e-06	-3.19515
GNAZ	guanine nucleotide binding protein (G p																	RBP4	1.89523e-05	2.06166		c10orf140	1.52828e-05	-2.7721		TLE2	1.29157e-06	-3.55159
GNB4	guanine nucleotide binding protein (G p																	RBP7	6.23313e-07	2.57687		c21orf57	9.92359e-09	-2.18991		TLR2	5.8419e-07	2.60953
GNG11	guanine nucleotide binding protein (G p																	RCAN1	2.46e-07	2.02341		ca12	6.47688e-07	2.11391		TMC4	0.000193663	-2.13257
GOLGA8A	golgi autoantigen, golgin subfamily a,																	RCBTB1	2.09525e-10	2.38924		cadps2	4.78098e-09	-2.22571		TMEM139	0.000351805	-2.08367
GPCPD1	hypothetical protein KIAA1434																	RFK	4.2258e-07	2.1285		cdh5	6.4703e-09	5.63953		TMEM154	1.90435e-08	2.92957
GPNMB	glycoprotein (transmembrane) nmb																	RNF40	2.62956e-11	-2.33885		clic3	0.00254597	-2.02072		TMEM158	4.96352e-06	2.97269
GPR158	G protein-coupled receptor 158																	RNPC3	3.4513e-07	-2.10998		dapp1	3.66266e-06	2.27529		TMEM22	1.46295e-07	2.8652
GPS1	G protein pathway suppressor 1																	RPL10P6	1.00579e-08	-2.05391		dock10	2.33012e-07	3.01469		TNC	2.76268e-06	3.65851
GPX4	glutathione peroxidase 4 (phospholipid																	RSAD2	1.49465e-07	8.89928		dsc3	3.74775e-05	-2.05532		TNFAIP3	9.52533e-08	7.41874
GRAMD4	TSC22 domain family, member 3																	Rasef	9.82419e-06	2.46465		dusp6	0.00033173	2.50895		TNFSF10	0.00408556	-2.81476
GRB10	growth factor receptor-bound protein 10																	Rbp1	2.21856e-05	2.63327		fggy	5.70277e-05	-2.06988		TNNI2	7.85134e-09	-4.84716
GREM1	gremlin 1, cysteine knot superfamily, h																	Rhobtb2	1.1007e-10	-2.46946		fn1	8.62854e-05	2.26011		TNNT1	5.27952e-05	-2.08112
GRTP1	growth hormone regulated TBC protein 1																	S100A8	1.78891e-07	12.6052		fxyd3	5.75089e-05	-2.17372		TNS4	1.67181e-07	2.87298
GSTA4	glutathione S-transferase alpha 4																	S100A9	1.78701e-06	4.35786		gfpt2	1.31419e-10	2.28755		TXNDC6	0.00583387	2.17325
GSTM3	glutathione S-transferase mu 3 (brain)																	S100P	0.00031815	2.23244		gpr18	0.00435554	2.24437		Tgm1	7.46091e-08	-4.45895
GTSE1	G-2 and S-phase expressed 1																	SACS	1.18512e-05	2.17945		id1	3.96339e-05	-2.0774		Thbs1	0.000199759	2.57683
GTSF1	gametocyte specific factor 1																	SALL2	9.64865e-08	-2.68396		igfbp3	2.76009e-09	-4.25695		Thnsl1	2.38689e-07	-2.01153
GYPC	glycophorin C (Gerbich blood group)																	SCML1	2.55405e-06	2.02958		ina	0.000187335	2.71641		Tnip1	3.72826e-07	2.49223
Gabre	gamma-aminobutyric acid (GABA) A recept																	SEPX1	8.73287e-09	-2.47059		kctd12	5.45982e-06	-2.22789		Trim31	0.000172934	-3.69408
Gdf15	growth differentiation factor 15																	SERPINA1	6.53578e-05	2.36081		loxl1	5.99826e-05	2.20758		VEGFC	1.72207e-06	2.88057
Gja5	gap junction protein, alpha 5, 40kDa																	SERPINB5	2.81182e-07	-2.79488		lrtomt	2.17283e-08	-2.19804		VILL	1.34877e-06	-2.50541
Gldc	glycine dehydrogenase (decarboxylating)																	SFXN3	4.19403e-11	-2.25741		mettl7a	0.00022017	-2.8676		VIM	1.01239e-07	6.23883
Glis3	GLIS family zinc finger 3																	SH2B3	7.98812e-07	2.11649		mfsd2a	6.52462e-08	3.22142		VSTM1	8.56442e-06	4.43689
Gprc5b	G protein-coupled receptor, family C, g																	SH3BP5L	2.69994e-10	-2.10368		mx1	0.00178971	2.06177		Vgll1	4.09931e-11	-4.35818
H19	H19, imprinted maternally expressed tra																	SLC12A7	4.38422e-06	2.36433		paaF1	1.01615e-09	-2.21903		WASF3	1.57324e-08	2.40068
HACE1	HECT domain and ankyrin repeat containi																	SLC16A14	4.09366e-05	2.79714		pcsk9	1.17327e-09	3.81131		XAF1	0.00507323	2.02469
HBEGF	heparin-binding EGF-like growth factor																	SLC1A3	0.00162889	2.43549		pmp22	6.69724e-08	2.99879		ZBTB1	1.55019e-05	2.12135
HCFC1R1	host cell factor C1 regulator 1 (XPO1 d																	SLC1A5	1.446e-08	2.28909		postn	1.22001e-07	10.9672		ZC3H12C	1.16443e-10	3.33254
HCLS1	hematopoietic cell-specific Lyn substra																	SLC7A1	2.69413e-09	2.08326		prkar2b	2.46153e-05	-2.08811		ZNF140	1.04145e-08	2.09079
HEG1	HEG homolog 1 (zebrafish)																	SLC7A11	6.06262e-11	4.87724		pstpip2	2.73903e-06	2.00529		ZNF385A	5.44789e-05	-2.10589
HERC5	hect domain and RLD 5																	SLC9A3R1	7.49421e-07	-2.05402		rbm24	3.57853e-11	8.29322		ZNF44	8.17567e-08	2.32378
HEY1	hairy/enhancer-of-split related with YR																	SNCG	1.41277e-07	-3.00284		sall4	2.46348e-05	2.53655		ZNF528	1.04292e-09	2.44065
HHLA3	HERV-H LTR-associating 3																	SNORD52	2.51708e-15	3.173		serpina3	0.000374705	4.95283		ZNF697	4.17031e-07	2.93103
HIST1H2AL	histone cluster 1, H2ag																	SNX24	2.3139e-11	2.08409		socs2	1.22648e-05	3.59053		Zdhhc14	1.193e-07	2.05625
HIST1H2BD	histone cluster 1, H2bd																	SP6	3.71266e-05	-2.18136		srgn	3.13125e-13	24.5108		Znf608	2.878e-06	-3.26172
HIST1H2BG	histone cluster 1, H2be																	SPAG5	2.33957e-06	-2.17587		thbs2	1.68799e-08	6.07593		abcc4	3.73754e-07	2.2598
HIST1H3H	histone cluster 1, H3c																	SPATA24	8.22211e-07	-2.15834		tm4sf18	3.49236e-13	16.7384		adam19	6.62145e-08	2.31957
HIST2H2BE	histone cluster 2, H2be																	ST3GAL1	6.66551e-08	2.35586		tmem45b	1.2475e-07	-2.62935		as3mt	4.77119e-07	-2.26937
HKDC1	hexokinase domain containing 1																	STC2	1.39071e-09	4.8895		tnnc1	0.000809324	-2.3374		atp2b4	7.08485e-08	-2.09104
HLA-B	major histocompatibility complex, class																	STEAP1	0.000705951	2.19978		tubb2b	1.75696e-05	2.21703		c10orf140	4.46402e-07	-3.70876
HLA-DMB	major histocompatibility complex, class																	SUOX	4.71861e-13	-2.9574		upk2	4.48748e-07	-3.29341		c17orf108	0.000167131	-2.03748
HLA-DRA	major histocompatibility complex, class																	Sat1	5.12601e-13	5.18417		zmat5	1.49665e-06	-2.07535		c17orf28	1.61121e-05	-2.02493
HLA-E	major histocompatibility complex, class																	Siah2	4.08575e-10	2.23349						c17orf49	2.85207e-06	-2.00923
HLA-F	major histocompatibility complex, class																	Slc29a3	2.91015e-09	-4.57744						ca12	2.987e-07	2.1983
HOXA4	homeobox A4																	Slc4a7	1.19093e-06	2.09511						cables2	4.82875e-08	-2.09148
HOXA5	homeobox A5																	Sod2	4.59568e-05	3.27921						cadps2	1.05547e-10	-2.6944
HOXA7	homeobox A7																	Steap2	3.91677e-09	2.39333						cdh5	5.81639e-06	3.04683
HOXC10	homeobox C10																	Syt12	1.65162e-06	-3.10705						clic3	2.88543e-06	-3.6621
HOXC13	homeobox C13																	TFPI2	2.67802e-08	2.74149						clu	1.18637e-05	-2.10155
HPDL	4-hydroxyphenylpyruvate dioxygenase-lik																	THSD4	1.96927e-11	2.31312						crabp2	3.24175e-07	-2.51204
HRASLS2	HRAS-like suppressor 2																	THY1	9.02442e-06	-2.01094						crip1	2.73531e-06	-2.3006
HRK	harakiri, BCL2 interacting protein (con																	TLR2	3.96032e-06	2.31683						cyr61	0.000110249	2.53787
HSD11B1	hydroxysteroid (11-beta) dehydrogenase																	TMEM116	1.63632e-08	2.33355						dapp1	6.53079e-07	2.52524
HSD17B11	hydroxysteroid (17-beta) dehydrogenase																	TMEM22	1.629e-06	2.45324						dock10	2.11843e-09	4.33122
HSD17B8	hydroxysteroid (17-beta) dehydrogenase																	TMEM45A	4.34698e-05	2.53047						dsc3	1.55655e-06	-2.49509
HSH2D	hematopoietic SH2 domain containing																	TNFRSF1B	7.88957e-06	3.77409						dse	1.43222e-06	2.14976
HSPA1B	heat shock 70kDa protein 1B																	TRIB3	3.81406e-10	2.67327						dusp6	4.91404e-07	4.6311
HSPB8	heat shock 22kDa protein 8																	TXNIP	1.32481e-11	6.16332						ech1	2.59952e-08	-2.15842
Heca	headcase homolog (Drosophila)																	Tceal1	9.33543e-11	-2.08733						elf3	4.09122e-06	-2.92827
Hoxc6	homeobox C6																	Tnip1	2.70186e-07	2.54092						ext1	8.8449e-08	2.06549
Hsd17b1	hydroxysteroid (17-beta) dehydrogenase																	Trim31	0.0103055	-2.24483						fggy	2.0599e-05	-2.20446
Htr2b	5-hydroxytryptamine (serotonin) recepto																	Ttc39b	1.07286e-07	2.43057						fn1	1.07526e-06	3.12337
ICAM1	intercellular adhesion molecule 1																	ULBP2	1.47611e-07	2.16595						fscn1	2.45345e-08	2.1976
ID2	inhibitor of DNA binding 2, dominant ne																	USP5	4.96997e-10	-2.03624						fxyd3	9.16435e-07	-2.88302
IDI1	isopentenyl-diphosphate delta isomerase																	Upk1b	1.61728e-09	-3.24029						gats	7.40103e-05	-2.55725
IFI16	interferon, gamma-inducible protein 16																	VEGFA	1.31722e-10	3.55046						gfpt2	1.04868e-09	2.09039
IFI27	interferon, alpha-inducible protein 27																	Vgll1	1.17467e-08	-2.91797						gjb2	2.17161e-05	2.21497
IFI35	interferon-induced protein 35																	WASF3	1.62622e-07	2.13493						gpX3	8.14391e-06	-2.22177
IFI44	interferon-induced protein 44																	WRAP53	1.64744e-11	-2.07218						gramd1c	5.42005e-09	-2.55194
IFI6	interferon, alpha-inducible protein 6																	Xbp1	8.70569e-09	2.3611						hmox1	3.93496e-06	-2.15747
IFIH1	interferon induced with helicase C doma																	YPEL5	2.50779e-09	2.26469						id1	8.37901e-09	-3.66081
IFIT1	interferon-induced protein with tetratr																	ZC3H12C	6.94892e-13	4.84968						igfbp3	3.74533e-11	-6.28839
IFT122	intraflagellar transport 122 homolog (C																	ZC3H8	6.72986e-09	2.19633						irx2	0.000768198	-2.28607
IGDCC4	immunoglobulin superfamily, DCC subclas																	ZNF140	4.06377e-10	2.43026						llgl2	2.40463e-05	-2.14966
IGFL1	IGF-like family member 1																	ZNF165	1.66992e-09	-2.01552						loxl1	0.00013458	2.09161
IL11	interleukin 11																	ZNF280C	4.52149e-08	2.2527						lrtomt	1.10637e-09	-2.55146
IL12RB1	interleukin 12 receptor, beta 1																	ZNF295	1.18471e-07	2.01849						lypd6b	0.000221792	-2.02409
IL1B	interleukin 1, beta																	Zbtb8a	1.43815e-08	2.04438						mettl7a	1.17306e-06	-4.91325
IL1F5	interleukin 1 family, member 5 (delta)																	Zfand1	1.33573e-09	2.10767						mfsd2a	2.20609e-06	2.53003
IL22RA1	interleukin 22 receptor, alpha 1																	apod	0.00807711	2.0664						mgmt	0.000641649	-2.10518
IL23A	interleukin 23, alpha subunit p19																	arrdc3	2.70333e-07	2.35205						nog	0.000855746	2.03113
IL32	interleukin 32																	asnS	1.09287e-16	3.37803						pcsk9	7.21864e-09	3.33703
IL6	interleukin 6 (interferon, beta 2)																	atp2b4	8.44182e-12	-3.4218						phyH	1.11915e-06	-2.02684
IL6ST	interleukin 6 signal transducer (gp130,																	atp6v0d1	1.40895e-08	-2.19355						pmp22	1.64309e-10	4.73835
IL8	interleukin 8																	bag3	1.89121e-10	-2.03655						ppm1h	7.37829e-07	-2.00726
IMP3	IMP3, U3 small nucleolar ribonucleoprot																	bccip	5.60985e-10	-2.67916						pstpip2	8.59078e-07	2.12526
INPP4B	inositol polyphosphate-4-phosphatase, t																	c17orf48	6.6725e-09	2.18112						ptprr	3.59409e-05	-2.30519
INSIG1	insulin induced gene 1																	carS	1.52925e-14	2.15267						rabl4	9.08066e-05	-2.04201
IPO4	importin 4																	cdc42ep1	2.11555e-07	2.20508						rgmb	4.45999e-07	2.29717
IRAK2	interleukin-1 receptor-associated kinas																	cdh5	0.00117003	2.00593						rogdi	3.71674e-06	-2.06889
IRF7	interferon regulatory factor 7																	cdk5	3.32915e-09	-2.70313						stc1	0.00174263	2.41906
IRF9	interferon regulatory factor 9																	clic3	5.04345e-06	-3.47938						tc2n	0.00102519	-2.35563
IRS1	insulin receptor substrate 1																	cryz	2.9467e-08	-2.0111						thbs2	1.16369e-09	8.22874
ISG15	ISG15 ubiquitin-like modifier																	cstA	8.0885e-05	3.27424						tm7sf2	0.000221085	-2.27475
ISG20	interferon stimulated exonuclease gene																	cyr61	1.70737e-05	2.96606						tmem45b	2.09299e-10	-4.07551
ITGA2	integrin, alpha 2 (CD49B, alpha 2 subun																	dhrs1	1.00432e-07	-2.20716						tnnc1	4.0661e-07	-4.80338
ITGA5	integrin, alpha 5 (fibronectin receptor																	dnajb9	5.39746e-09	2.59649						trnP1	0.000105397	2.27568
ITGB2	integrin, beta 2 (complement component																	dusp5	5.77752e-06	2.19625						ttc9	2.18331e-10	-2.37084
ITGBL1	integrin, beta-like 1 (with EGF-like re																	dusp6	2.16788e-06	3.99687						tubb2b	1.3206e-06	2.61654
ITPRIP	inositol 1,4,5-triphosphate receptor in																	eif3g	3.29025e-09	-2.29192						upk2	4.84992e-09	-4.83224
Id3	inhibitor of DNA binding 3, dominant ne																	fam107b	7.5319e-11	2.77532						upp1	9.50457e-07	2.15151
Ier3	immediate early response 3																	fhod1	1.70495e-07	-2.08691
Ifit3	interferon-induced protein with tetratr																	gjb2	1.00949e-08	3.78074
Ifitm1	interferon induced transmembrane protei																	glcci1	5.53488e-10	-2.12993
Ifne	interferon, epsilon																	gpX3	5.92782e-06	-2.26449
Inhbb	inhibin, beta B																	gsr	4.17976e-09	-2.24929
Irf1	interferon regulatory factor 1																	hcp5	2.02459e-06	3.17834
Isl1	ISL LIM homeobox 1																	hla-drb1	3.74694e-06	3.02285
JAG1	jagged 1 (Alagille syndrome)																	hoxa1	2.60825e-05	-2.80931
KAT2B	K(lysine) acetyltransferase 2B																	hoxa2	0.0115571	-2.15614
KDELR3	KDEL (Lys-Asp-Glu-Leu) endoplasmic reti																	id1	7.98129e-08	-3.10277
KIAA0355	KIAA0355																	ip6k2	5.49767e-07	-2.16065
KIAA0754	KIAA0754																	irx2	0.00173608	-2.12698
KIAA1274	KIAA1274																	kiaa1370	4.20023e-08	-2.61904
KIF14	kinesin family member 14																	kif20a	5.96699e-11	-4.25569
KIF26A	kinesin family member 26A																	lmna	1.39091e-13	-2.57119
KLF10	Kruppel-like factor 10																	malL	7.94637e-08	-2.37536
KLHDC7B	kelch domain containing 7B																	mettl7a	2.3444e-06	-4.55975
KLHL24	kelch-like 24 (Drosophila)																	mfsd2a	9.47784e-09	3.72264
KLHL29	kelch-like 29 (Drosophila)																	mthfd2	6.74551e-09	2.42154
KLK5	kallikrein-related peptidase 5																	mx1	9.54935e-07	3.98027
KLK6	kallikrein-related peptidase 6																	nsdhl	8.87246e-10	-2.4979
KLK7	kallikrein-related peptidase 7																	nupr1	3.09418e-11	8.86813
KLK8	kallikrein-related peptidase 8																	pck2	2.08614e-08	2.58944
KRT13	keratin 13																	pdcd2	1.56118e-10	-2.15735
KRT19	keratin 19																	phlda1	3.34141e-08	2.10512
KRT5	keratin 5																	pld6	1.92425e-09	2.30505
Klf4	Kruppel-like factor 4 (gut)																	plscr1	3.41625e-09	2.77422
Krt15	keratin 15																	prss23	1.52409e-08	-2.32709
Krt23	keratin 23 (histone deacetylase inducib																	psmd3	9.03034e-14	-2.19471
LAMC2	laminin, gamma 2																	pstpip2	2.10395e-06	2.03166
LAMP3	lysosomal-associated membrane protein 3																	pten	1.20668e-10	-2.3306
LAP3	leucine aminopeptidase 3																	rarres3	8.1157e-06	2.99259
LAPTM5	lysosomal multispanning membrane protei																	ripk4	9.64987e-09	-2.16667
LARGE	like-glycosyltransferase																	rnf26	1.00604e-11	-2.28209
LAYN	layilin																	serpina3	2.32645e-06	11.3228
LCAT	lecithin-cholesterol acyltransferase																	slc1a4	3.49072e-14	5.0675
LCP1	lymphocyte cytosolic protein 1 (L-plast																	slc25a10	7.46899e-08	-2.27136
LEPREL1	leprecan-like 1																	sqlE	1.63467e-07	-2.10784
LGR6	leucine-rich repeat-containing G protei																	tap1	3.45288e-06	2.13084
LIF	leukemia inhibitory factor (cholinergic																	thbs2	8.9305e-07	4.06904
LIPG	lipase, endothelial																	trafd1	2.81345e-09	-2.08019
LOC100128098	hypothetical protein LOC100128098																	trub2	3.6196e-07	-2.1354
LOC100128288	hypothetical protein LOC100128288																	tubb3	1.37527e-10	-3.13208
LOC100129637	hypothetical LOC100129637																	tube1	3.77935e-09	3.98956
LOC100131015	hypothetical LOC100131015																	upp1	6.75786e-09	2.84135
LOC100133632	family with sequence similarity 101, me
LOC100133690	activated leukocyte cell adhesion molec
LOC126987	similar to hCG2040319
LOC282997	hypothetical protein LOC282997
LOC284620	claudin 6
LOC285943	hypothetical protein LOC285943
LOC440335	hypothetical LOC440335
LOC643008	hypothetical protein LOC643008
LOC644456	similar to CG18005
LOC645638	similar to WDNM1-like protein
LOC648603	acetyl-Coenzyme A acyltransferase 2
LOC652522	Werner syndrome, RecQ helicase-like
LOC729013	hypothetical protein LOC729013
LOC729538	chromosome 9 open reading frame 30
LOC729859	WW domain binding protein 1
LOC729970	similar to hCG2028352
LONRF1	LON peptidase N-terminal domain and rin
LPHN2	latrophilin 2
LRG1	leucine-rich alpha-2-glycoprotein 1
LRP8	low density lipoprotein receptor-relate
LTB	lymphotoxin beta (TNF superfamily, memb
LTBP2	latent transforming growth factor beta
LXN	latexin
LY6D	lymphocyte antigen 6 complex, locus D
LY6G6C	lymphocyte antigen 6 complex, locus G6C
LY96	lymphocyte antigen 96
LYPD3	LY6/PLAUR domain containing 3
Lamb3	laminin, beta 3
Lcn2	lipocalin 2
Ldlr	low density lipoprotein receptor
Loxl4	lysyl oxidase-like 4
Lpxn	leupaxin
Lrch1	leucine-rich repeats and calponin homol
MACF1	microtubule-actin crosslinking factor 1
MAMDC2	MAM domain containing 2
MAP1B	microtubule-associated protein 1B
MAP3K8	mitogen-activated protein kinase kinase
MATN3	matrilin 3
MB	myoglobin
MDP1	magnesium-dependent phosphatase 1
MEGF6	multiple EGF-like-domains 6
MESP1	mesoderm posterior 1 homolog (mouse)
METTL7B	methyltransferase like 7B
MFAP2	microfibrillar-associated protein 2
MGAT4A	mannosyl (alpha-1,3-)-glycoprotein beta
MGC16121	hypothetical protein MGC16121
MGP	matrix Gla protein
MICAL2	microtubule associated monoxygenase, ca
MID1	midline 1 (Opitz/BBB syndrome)
MKI67	antigen identified by monoclonal antibo
MLKL	mixed lineage kinase domain-like
MMD	monocyte to macrophage differentiation-
MMP14	matrix metallopeptidase 14 (membrane-in
MOXD1	monooxygenase, DBH-like 1
MPP3	membrane protein, palmitoylated 3 (MAGU
MPZ	myelin protein zero
MT1M	metallothionein 1M
MUC20	mucin 20, cell surface associated
MUC4	mucin 4, cell surface associated
MXI1	MAX interactor 1
MYH15	myosin, heavy chain 15
MYL9	myosin, light chain 9, regulatory
Maff	v-maf musculoaponeurotic fibrosarcoma o
Magee1	melanoma antigen family E, 1
Mcm5	minichromosome maintenance complex comp
Mdk	midkine (neurite growth-promoting facto
Mlph	melanophilin
Mmp9	matrix metallopeptidase 9 (gelatinase B
NAMPT	nicotinamide phosphoribosyltransferase
NCAPD2	non-SMC condensin I complex, subunit D2
NCCRP1	non-specific cytotoxic cell receptor pr
NCEH1	arylacetamide deacetylase-like 1
NCRNA00219	chromosome 5 open reading frame 26
NFE2L3	nuclear factor (erythroid-derived 2)-li
NFIL3	nuclear factor, interleukin 3 regulated
NFKBIA	nuclear factor of kappa light polypepti
NFKBIZ	nuclear factor of kappa light polypepti
NIPSNAP1	nipsnap homolog 1 (C. elegans)
NLRC5	NLR family, CARD domain containing 5
NME5	non-metastatic cells 5, protein express
NOVA1	neuro-oncological ventral antigen 1
NR1H3	nuclear receptor subfamily 1, group H,
NR2F2	nuclear receptor subfamily 2, group F,
NRP1	neuropilin 1
NT5E	5'-nucleotidase, ecto (CD73)
NUAK1	NUAK family, SNF1-like kinase, 1
NUAK2	NUAK family, SNF1-like kinase, 2
NUDT16L1	nudix (nucleoside diphosphate linked mo
NUP62CL	nucleoporin 62kDa C-terminal like
Nmu	neuromedin U
Npm2	nucleophosmin/nucleoplasmin, 2
Nynrin	KIAA1305
OAS1	2',5'-oligoadenylate synthetase 1, 40/4
OASL	2'-5'-oligoadenylate synthetase-like
OLFML2A	olfactomedin-like 2A
OPTN	optineurin
ORAOV1	oral cancer overexpressed 1
OSBPL1A	oxysterol binding protein-like 1A
OSR2	odd-skipped related 2 (Drosophila)
Oas3	2'-5'-oligoadenylate synthetase 3, 100k
Olr1	oxidized low density lipoprotein (lecti
Osr1	odd-skipped related 1 (Drosophila)
Ostalpha	organic solute transporter alpha
P2ry6	pyrimidinergic receptor P2Y, G-protein
PADI2	peptidyl arginine deiminase, type II
PADI3	peptidyl arginine deiminase, type III
PALM3	Paralemmin-3
PARP14	poly (ADP-ribose) polymerase family, me
PARP8	poly (ADP-ribose) polymerase family, me
PARP9	poly (ADP-ribose) polymerase family, me
PBX1	pre-B-cell leukemia homeobox 1
PCYOX1	prenylcysteine oxidase 1
PDCD4	programmed cell death 4 (neoplastic tra
PDSS1	prenyl (decaprenyl) diphosphate synthas
PDZK1IP1	PDZK1 interacting protein 1
PEBP1	phosphatidylethanolamine binding protei
PEG10	paternally expressed 10
PET112L	PET112-like (yeast)
PEX11A	peroxisomal biogenesis factor 11 alpha
PGP	phosphoglycolate phosphatase
PHLDB1	pleckstrin homology-like domain, family
PI3	peptidase inhibitor 3, skin-derived
PIH1D2	PIH1 domain containing 2
PIK3C2B	phosphoinositide-3-kinase, class 2, bet
PIK3CD	phosphoinositide-3-kinase, catalytic, d
PIK3R3	phosphoinositide-3-kinase, regulatory s
PILRB	paired immunoglobin-like type 2 recepto
PIR	pirin (iron-binding nuclear protein)
PKP1	plakophilin 1 (ectodermal dysplasia/ski
PLA2G10	phospholipase A2, group X
PLAC2	placenta-specific 2 (non-protein coding
PLAC8	placenta-specific 8
PLAGL1	pleiomorphic adenoma gene-like 1
PLAT	plasminogen activator, tissue
PLAU	plasminogen activator, urokinase
PLAUR	plasminogen activator, urokinase recept
PLCE1	phospholipase C, epsilon 1
PLEKHG6	pleckstrin homology domain containing,
PLK1	polo-like kinase 1 (Drosophila)
PLLP	plasma membrane proteolipid (plasmolipi
PMAIP1	phorbol-12-myristate-13-acetate-induced
PNMAL1	PNMA-like 1
POLM	polymerase (DNA directed), mu
PON3	paraoxonase 3
PP14571	similar to hCG1777210
PPARG	peroxisome proliferator-activated recep
PPM1N	protein phosphatase 1B-like
PPP2R1A	protein phosphatase 2 (formerly 2A), re
PQLC3	PQ loop repeat containing 3
PRKAR1B	protein kinase, cAMP-dependent, regulat
PRKCD	protein kinase C, delta
PROM1	prominin 1
PRR15L	ATPase family, AAA domain containing 4
PSAT1	phosphoserine aminotransferase 1
PSCA	prostate stem cell antigen
PSD3	pleckstrin and Sec7 domain containing 3
PSG9	pregnancy specific beta-1-glycoprotein
PTOV1	prostate tumor overexpressed 1
PTPLAD2	protein tyrosine phosphatase-like A dom
PTPN6	protein tyrosine phosphatase, non-recep
PTRF	polymerase I and transcript release fac
PXDN	peroxidasin homolog (Drosophila)
Pdgfb	platelet-derived growth factor beta pol
Pdp1	pyruvate dehyrogenase phosphatase catal
Pear1	platelet endothelial aggregation recept
Pepd	peptidase D
Pkib	protein kinase (cAMP-dependent, catalyt
Plbd1	phospholipase B domain containing 1
Plcd1	phospholipase C, delta 1
Plekhg4	pleckstrin homology domain containing,
Plxnd1	plexin D1
Ppp2r3a	protein phosphatase 2 (formerly 2A), re
Ppt2	palmitoyl-protein thioesterase 2
Prame	preferentially expressed antigen in mel
Psrc1	proline/serine-rich coiled-coil 1
Ptger4	prostaglandin E receptor 4 (subtype EP4
Ptx3	pentraxin-related gene, rapidly induced
Pycr1	pyrroline-5-carboxylate reductase 1
QARS	glutaminyl-tRNA synthetase
QPRT	quinolinate phosphoribosyltransferase
RAB15	RAB15, member RAS onocogene family
RAB20	RAB20, member RAS oncogene family
RAB26	RAB26, member RAS oncogene family
RAB33B	RAB33B, member RAS oncogene family
RAI14	retinoic acid induced 14
RALGPS1	Ral GEF with PH domain and SH3 binding
RAP1GAP2	GTPase activating Rap/RanGAP domain-lik
RARRES2	retinoic acid receptor responder (tazar
RASSF2	Ras association (RalGDS/AF-6) domain fa
RBP4	retinol binding protein 4, plasma
RBP7	retinol binding protein 7, cellular
RCAN1	regulator of calcineurin 1
RCBTB1	regulator of chromosome condensation (R
REEP6	receptor accessory protein 6
RFK	riboflavin kinase
RGNEF	Rho-guanine nucleotide exchange factor
RHBG	Rh family, B glycoprotein (gene/pseudog
RNF213	ring finger protein 213
RNF40	ring finger protein 40
RNPC3	RNA-binding region (RNP1, RRM) containi
RPL10P6	ribosomal protein L10
RPL23AP32	ribosomal protein L23a pseudogene 32
RSAD2	radical S-adenosyl methionine domain co
RTN4RL1	reticulon 4 receptor-like 1
Rab11fip4	RAB11 family interacting protein 4 (cla
Rasef	RAS and EF-hand domain containing
Rbp1	retinol binding protein 1, cellular
Rdm1	RAD52 motif 1
Rec8	REC8 homolog (yeast)
Rhebl1	Ras homolog enriched in brain like 1
Rhobtb2	Rho-related BTB domain containing 2
Rhov	ras homolog gene family, member V
Robo4	roundabout homolog 4, magic roundabout
S100A1	S100 calcium binding protein A1
S100A8	S100 calcium binding protein A8
S100A9	S100 calcium binding protein A9
S100P	S100 calcium binding protein P
S100a3	S100 calcium binding protein A3
S100a4	S100 calcium binding protein A4
S1PR1	sphingosine-1-phosphate receptor 1
SAA4	serum amyloid A4, constitutive
SACS	spastic ataxia of Charlevoix-Saguenay (
SALL2	sal-like 2 (Drosophila)
SCARF1	scavenger receptor class F, member 1
SCEL	sciellin
SCG5	secretogranin V (7B2 protein)
SCML1	sex comb on midleg-like 1 (Drosophila)
SDR16C5	short chain dehydrogenase/reductase fam
SELENBP1	selenium binding protein 1
SELM	selenoprotein M
SEMA3C	sema domain, immunoglobulin domain (Ig)
SEPX1	selenoprotein X, 1
SERPINA1	serpin peptidase inhibitor, clade A (al
SERPINB5	serpin peptidase inhibitor, clade B (ov
SERPINB7	serpin peptidase inhibitor, clade B (ov
SERPINE1	serpin peptidase inhibitor, clade E (ne
SFXN3	sideroflexin 3
SH2B3	SH2B adaptor protein 3
SH2D5	SH2 domain containing 5
SH3BP5L	SH3-binding domain protein 5-like
SLC12A7	solute carrier family 12 (potassium/chl
SLC15A3	solute carrier family 15, member 3
SLC16A14	solute carrier family 16, member 14 (mo
SLC16A4	solute carrier family 16, member 4 (mon
SLC1A3	solute carrier family 1 (glial high aff
SLC1A5	solute carrier family 1 (neutral amino
SLC2A10	solute carrier family 2 (facilitated gl
SLC2A6	solute carrier family 2 (facilitated gl
SLC35F3	solute carrier family 35, member F3
SLC40A1	solute carrier family 40 (iron-regulate
SLC7A1	solute carrier family 7 (cationic amino
SLC7A11	solute carrier family 7, (cationic amin
SLC7A7	solute carrier family 7 (cationic amino
SLC9A3R1	solute carrier family 9 (sodium/hydroge
SLCO2A1	solute carrier organic anion transporte
SLITRK5	SLIT and NTRK-like family, member 5
SMTNL2	smoothelin-like 2
SMURF2	SMAD specific E3 ubiquitin protein liga
SNCG	synuclein, gamma (breast cancer-specifi
SNORA61	small nucleolar RNA, H/ACA box 61
SNORD52	chromosome 6 open reading frame 48
SNX24	sorting nexin 24
SP110	SP110 nuclear body protein
SP6	Sp6 transcription factor
SPAG4	sperm associated antigen 4
SPAG5	sperm associated antigen 5
SPATA24	hypothetical protein LOC202051
SPHK1	sphingosine kinase 1
SPOCD1	SPOC domain containing 1
SPOCK2	sparc/osteonectin, cwcv and kazal-like
SPRY1	sprouty homolog 1, antagonist of FGF si
SPRY4	sprouty homolog 4 (Drosophila)
SSBP2	single-stranded DNA binding protein 2
ST3GAL1	ST3 beta-galactoside alpha-2,3-sialyltr
STAT1	signal transducer and activator of tran
STC2	stanniocalcin 2
STEAP1	six transmembrane epithelial antigen of
STEAP4	STEAP family member 4
STMN3	stathmin-like 3
SULF2	sulfatase 2
SULT2B1	sulfotransferase family, cytosolic, 2B,
SUOX	sulfite oxidase
SUSD5	sushi domain containing 5
SYTL2	synaptotagmin-like 2
Sat1	spermidine/spermine N1-acetyltransferas
Sema3e	sema domain, immunoglobulin domain (Ig)
Serpinf1	serpin peptidase inhibitor, clade F (al
Serpini1	serpin peptidase inhibitor, clade I (ne
Sfrp1	secreted frizzled-related protein 1
Sh3bgr	SH3 domain binding glutamic acid-rich p
Siah2	seven in absentia homolog 2 (Drosophila
Slc15a1	solute carrier family 15 (oligopeptide
Slc29a3	solute carrier family 29 (nucleoside tr
Slc43a3	solute carrier family 43, member 3
Slc4a7	solute carrier family 4, sodium bicarbo
Smyd3	SET and MYND domain containing 3
Sod2	superoxide dismutase 2, mitochondrial
Spa17	sperm autoantigenic protein 17
Spock1	sparc/osteonectin, cwcv and kazal-like
St6galnac2	ST6 (alpha-N-acetyl-neuraminyl-2,3-beta
Steap2	six transmembrane epithelial antigen of
Sts	steroid sulfatase (microsomal), isozyme
Susd3	sushi domain containing 3
Syt12	synaptotagmin XII
Syt7	synaptotagmin XVII
TCEA3	transcription elongation factor A (SII)
TFPI	tissue factor pathway inhibitor (lipopr
TFPI2	tissue factor pathway inhibitor 2
TGFB2	transforming growth factor, beta 2
THSD4	thrombospondin, type I, domain containi
THY1	Thy-1 cell surface antigen
TLE2	transducin-like enhancer of split 2 (E(
TLR2	toll-like receptor 2
TLR3	toll-like receptor 3
TMC4	transmembrane channel-like 4
TMEM116	transmembrane protein 116
TMEM139	transmembrane protein 139
TMEM140	transmembrane protein 140
TMEM154	transmembrane protein 154
TMEM158	transmembrane protein 158
TMEM22	transmembrane protein 22
TMEM27	transmembrane protein 27
TMEM45A	transmembrane protein 45A
TMEM92	transmembrane protein 92
TMPRSS3	transmembrane protease, serine 3
TNC	tenascin C
TNF	tumor necrosis factor (TNF superfamily,
TNFAIP3	tumor necrosis factor, alpha-induced pr
TNFRSF1B	tumor necrosis factor receptor superfam
TNFSF10	tumor necrosis factor (ligand) superfam
TNNI2	troponin I type 2 (skeletal, fast)
TNNT1	troponin T type 1 (skeletal, slow)
TNS4	tensin 4
TP53INP2	tumor protein p53 inducible nuclear pro
TRANK1	lupus brain antigen 1
TRIB3	tribbles homolog 3 (Drosophila)
TRIM52	tripartite motif-containing 52
TRIM55	tripartite motif-containing 55
TRIML2	tripartite motif family-like 2
TRPV1	transient receptor potential cation cha
TTC18	tetratricopeptide repeat domain 18
TXNDC6	thioredoxin domain containing 6
TXNIP	thioredoxin interacting protein
Tceal1	transcription elongation factor A (SII)
Tgm1	transglutaminase 1 (K polypeptide epide
Thbs1	thrombospondin 1
Thnsl1	threonine synthase-like 1 (S. cerevisia
Tmem173	transmembrane protein 173
Tnfsf14	tumor necrosis factor (ligand) superfam
Tnip1	TNFAIP3 interacting protein 1
Trim31	tripartite motif-containing 31
Trmt1	TRM1 tRNA methyltransferase 1 homolog (
Tsen2	tRNA splicing endonuclease 2 homolog (S
Ttc39b	tetratricopeptide repeat domain 39B
UCP2	uncoupling protein 2 (mitochondrial, pr
ULBP2	UL16 binding protein 2
UPK3B	uroplakin 3B
USP5	ubiquitin specific peptidase 5 (isopept
Uba7	ubiquitin-like modifier activating enzy
Upk1b	uroplakin 1B
VEGFA	vascular endothelial growth factor A
VEGFC	vascular endothelial growth factor C
VILL	villin-like
VIM	vimentin
VSTM1	V-set and transmembrane domain containi
VTCN1	V-set domain containing T cell activati
Vash2	vasohibin 2
Vgll1	vestigial like 1 (Drosophila)
Vnn1	vanin 1
WASF3	WAS protein family, member 3
WNK4	WNK lysine deficient protein kinase 4
WNT5A	wingless-type MMTV integration site fam
WRAP53	WD repeat containing, antisense to TP53
XAF1	XIAP associated factor 1
XDH	xanthine dehydrogenase
XG	Xg blood group
Xbp1	X-box binding protein 1
YBX2	Y box binding protein 2
YPEL5	yippee-like 5 (Drosophila)
ZBTB1	zinc finger and BTB domain containing 1
ZC3H12C	zinc finger CCCH-type containing 12C
ZC3H8	zinc finger CCCH-type containing 8
ZFP82	zinc finger protein 82 homolog (mouse)
ZG16B	zymogen granule protein 16 homolog B (r
ZNF140	zinc finger protein 140
ZNF165	zinc finger protein 165
ZNF280C	zinc finger protein 280C
ZNF295	zinc finger protein 295
ZNF354A	zinc finger protein 354A
ZNF385A	zinc finger protein 385A
ZNF44	zinc finger protein 44
ZNF469	zinc finger protein 469
ZNF488	zinc finger protein 488
ZNF528	zinc finger protein 528
ZNF692	zinc finger protein 692
ZNF697	zinc finger protein 697
ZNF767	zinc finger family member 767
ZNF789	zinc finger protein 789
ZNF814	zinc finger protein 814
Zbtb8a	zinc finger and BTB domain containing 8
Zdhhc14	zinc finger, DHHC-type containing 14
Zfand1	zinc finger, AN1-type domain 1
Zg16	zymogen granule protein 16 homolog (rat
Znf608	zinc finger protein 608
abca4	ATP-binding cassette, sub-family A (ABC
abcc4	ATP-binding cassette, sub-family C (CFT
acss1	acyl-CoA synthetase short-chain family
acta2	actin, alpha 2, smooth muscle, aorta
adam19	ADAM metallopeptidase domain 19 (meltri
agt	angiotensinogen (serpin peptidase inhib
aldoc	aldolase C, fructose-bisphosphate
apod	apolipoprotein D
arhgef10	Rho guanine nucleotide exchange factor
arrdc3	arrestin domain containing 3
arrdc4	arrestin domain containing 4
as3mt	arsenic (+3 oxidation state) methyltran
asnS	asparagine synthetase
atp2b4	ATPase, Ca++ transporting, plasma membr
atp6v0d1	ATPase, H+ transporting, lysosomal 38kD
bag3	BCL2-associated athanogene 3
bccip	BRCA2 and CDKN1A interacting protein
bhlhe40	basic helix-loop-helix family, member e
c10orf140	chromosome 10 open reading frame 140
c14orf147	chromosome 14 open reading frame 147
c17orf108	hypothetical protein LOC201229
c17orf28	chromosome 17 open reading frame 28
c17orf48	chromosome 17 open reading frame 48
c17orf49	chromosome 17 open reading frame 49
c21orf57	chromosome 21 open reading frame 57
ca12	carbonic anhydrase XII
cables2	Cdk5 and Abl enzyme substrate 2
cadps2	Ca++-dependent secretion activator 2
carS	cysteinyl-tRNA synthetase
cdc42ep1	CDC42 effector protein (Rho GTPase bind
cdh5	cadherin 5, type 2 (vascular endotheliu
cdk5	cyclin-dependent kinase 5
cgnl1	cingulin-like 1
clic3	chloride intracellular channel 3
clu	clusterin
crabp2	cellular retinoic acid binding protein
crip1	cysteine-rich protein 1 (intestinal)
cryz	crystallin, zeta (quinone reductase)
cstA	cystatin A (stefin A)
cybrd1	cytochrome b reductase 1
cyr61	cysteine-rich, angiogenic inducer, 61
dapp1	dual adaptor of phosphotyrosine and 3-p
dhrs1	dehydrogenase/reductase (SDR family) me
dnajb9	DnaJ (Hsp40) homolog, subfamily B, memb
dock10	dedicator of cytokinesis 10
dsc3	desmocollin 3
dse	dermatan sulfate epimerase
dusp5	dual specificity phosphatase 5
dusp6	dual specificity phosphatase 6
ech1	enoyl Coenzyme A hydratase 1, peroxisom
eif3g	eukaryotic translation initiation facto
elf3	E74-like factor 3 (ets domain transcrip
ext1	exostoses (multiple) 1
fam107b	family with sequence similarity 107, me
fam70a	family with sequence similarity 70, mem
fggy	FGGY carbohydrate kinase domain contain
fhod1	formin homology 2 domain containing 1
fn1	fibronectin 1
fscn1	fascin homolog 1, actin-bundling protei
fxyd3	FXYD domain containing ion transport re
gats	GATS, stromal antigen 3 opposite strand
gfpt2	glutamine-fructose-6-phosphate transami
gjb2	gap junction protein, beta 2, 26kDa
glcci1	glucocorticoid induced transcript 1
gne	glucosamine (UDP-N-acetyl)-2-epimerase/
gpX3	glutathione peroxidase 3 (plasma)
gpr18	G protein-coupled receptor 18
gramd1c	GRAM domain containing 1C
gsr	glutathione reductase
hcp5	HLA complex P5
herc6	hect domain and RLD 6
hla-dpa1	major histocompatibility complex, class
hla-drb1	major histocompatibility complex, class
hmox1	heme oxygenase (decycling) 1
hoxa1	homeobox A1
hoxa2	homeobox A2
id1	inhibitor of DNA binding 1, dominant ne
ifit5	interferon-induced protein with tetratr
igfbp3	insulin-like growth factor binding prot
ina	internexin neuronal intermediate filame
ip6k2	inositol hexakisphosphate kinase 2
irx2	iroquois homeobox 2
kctd12	potassium channel tetramerisation domai
kiaa1370	KIAA1370
kif20a	kinesin family member 20A
lbh	limb bud and heart development homolog
llgl2	lethal giant larvae homolog 2 (Drosophi
lmna	lamin A/C
loxl1	lysyl oxidase-like 1
lrtomt	leucine rich transmembrane and 0-methyl
lypd6b	LY6/PLAUR domain containing 6B
malL	mal, T-cell differentiation protein-lik
map2	microtubule-associated protein 2
2010-03-03	membrane-associated ring finger (C3HC4)
mettl7a	methyltransferase like 7A
mfsd2a	major facilitator superfamily domain co
mgmt	O-6-methylguanine-DNA methyltransferase
mthfd2	methylenetetrahydrofolate dehydrogenase
mx1	myxovirus (influenza virus) resistance
ndrg1	N-myc downstream regulated 1
nog	noggin
nsdhl	NAD(P) dependent steroid dehydrogenase-
nupr1	nuclear protein, transcriptional regula
paaF1	proteasomal ATPase-associated factor 1
pcbd2	pterin-4 alpha-carbinolamine dehydratas
pck2	phosphoenolpyruvate carboxykinase 2 (mi
pcsk9	proprotein convertase subtilisin/kexin
pdcd2	programmed cell death 2
phlda1	pleckstrin homology-like domain, family
phyH	phytanoyl-CoA 2-hydroxylase
pld6	phospholipase D family, member 6
plscr1	phospholipid scramblase 1
pmp22	peripheral myelin protein 22
postn	periostin, osteoblast specific factor
ppm1h	protein phosphatase 1H (PP2C domain con
prkar2b	protein kinase, cAMP-dependent, regulat
prpH	peripherin
prss23	protease, serine, 23
psmd3	proteasome (prosome, macropain) 26S sub
pstpip2	proline-serine-threonine phosphatase in
pten	phosphatase and tensin homolog
ptprr	protein tyrosine phosphatase, receptor
rabl4	RAB, member of RAS oncogene family-like
rarres3	retinoic acid receptor responder (tazar
rbm24	RNA binding motif protein 24
rgmb	RGM domain family, member B
ripk4	receptor-interacting serine-threonine k
rnf26	ring finger protein 26
rogdi	rogdi homolog (Drosophila)
rtn2	reticulon 2
sall4	sal-like 4 (Drosophila)
serpina3	serpin peptidase inhibitor, clade A (al
sh3rf2	SH3 domain containing ring finger 2
slc1a4	solute carrier family 1 (glutamate/neut
slc25a10	solute carrier family 25 (mitochondrial
snai2	snail homolog 2 (Drosophila)
socs2	suppressor of cytokine signaling 2
sqlE	squalene epoxidase
srgn	serglycin
stc1	stanniocalcin 1
tap1	transporter 1, ATP-binding cassette, su
tc2n	tandem C2 domains, nuclear
thbs2	thrombospondin 2
tm4sf18	transmembrane 4 L six family member 18
tm7sf2	transmembrane 7 superfamily member 2
tmem45b	transmembrane protein 45B
tnnc1	troponin C type 1 (slow)
trafd1	TRAF-type zinc finger domain containing
trnP1	TMF1-regulated nuclear protein 1
trub2	TruB pseudouridine (psi) synthase homol
ttc9	tetratricopeptide repeat domain 9
tubb2b	tubulin, beta 2B
tubb3	tubulin, beta 3
tube1	tubulin, epsilon 1
upk2	uroplakin 2
upp1	uridine phosphorylase 1
zmat5	zinc finger, matrin type 5

## Sheet: HB2 MIRs
HB2 Different Passages (7)			HB2 Different Passages (7)
Uonion Mirs			Intersection Mirs			HB2 Treated vs. HB2 Un-treated			HB2 P1 vs. HB2 Un-treated			HB2 P3 vs. HB2 Un-treated			HB2 P5 vs. HB2 Un-treated			HB2 P7 vs. HB2 Un-treated			HB2 P10 vs. HB2 Un-treated
Mir ID	Sequence		Mir ID	Sequence		Mir ID	Fold-Change		Mir ID	Fold-Change		Mir ID	Fold-Change		Mir ID	Fold-Change		Mir ID	Fold-Change		Mir ID	Fold-Change
hsa-mir-106b	UAAAGUGCUGACAGUGCAGAU		hsa-mir-1228	GUGGGCGGGGGCAGGUGUGUG		hsa-mir-1207	5.36771		hsa-mir-1180	-2.09587		hsa-mir-106b	-2.96548		hsa-mir-106b	-3.37927		hsa-mir-106b	-2.35153		hsa-mir-106b	-3.97235
hsa-mir-1180	UUUCCGGCUCGCGUGGGUGUGU		hsa-mir-27b	UUCACAGUGGCUAAGUUCUGC		hsa-mir-1228	9.19269		hsa-mir-1228	2.26892		hsa-mir-1207	2.9777		hsa-mir-1228	6.73514		hsa-mir-1207	2.13293		hsa-mir-1228	9.31903
hsa-mir-1207	UGGCAGGGAGGCUGGGAGGGG		hsa-mir-663	AGGCGGGGCGCCGCGGGACCGC		hsa-mir-1231	9.87684		hsa-mir-126	3.96482		hsa-mir-1228	4.62335		hsa-mir-1268	4.53625		hsa-mir-1225	4.09494		hsa-mir-1268	6.3754
hsa-mir-1225	GUGGGUACGGCCCAGUGGGGGG					hsa-mir-1246	3.55142		hsa-mir-1281	4.17308		hsa-mir-1231	4.82212		hsa-mir-1308	5.29289		hsa-mir-1228	4.84745		hsa-mir-1275	2.11056
hsa-mir-1228	GUGGGCGGGGGCAGGUGUGUG					hsa-mir-1268	3.53761		hsa-mir-149	-4.40613		hsa-mir-1268	2.06694		hsa-mir-130a	-2.51685		hsa-mir-1231	2.48233		hsa-mir-1308	5.85709
hsa-mir-1231	GUGUCUGGGCGGACAGCUGC					hsa-mir-1308	-2.32806		hsa-mir-151	-2.30819		hsa-mir-130a	-2.82915		hsa-mir-141	-2.54981		hsa-mir-1268	4.47643		hsa-mir-130a	-3.35384
hsa-mir-1246	AAUGGAUUUUUGGAGCAGG					hsa-mir-132	-2.00543		hsa-mir-152	-3.02609		hsa-mir-141	-2.93756		hsa-mir-149	3.53903		hsa-mir-1308	6.71837		hsa-mir-149	5.17556
hsa-mir-126	UCGUACCGUGAGUAAUAAUGCG					hsa-mir-138-2 // hsa-mir-138-1	-2.25795		hsa-mir-15a	-2.62217		hsa-mir-149	3.90514		hsa-mir-152	-2.28269		hsa-mir-130a	-2.30027		hsa-mir-155	2.48758
hsa-mir-1268	CGGGCGUGGUGGUGGGGG					hsa-mir-141	-2.48769		hsa-mir-181b-1 // hsa-mir-181b-2	-2.04803		hsa-mir-15a	-3.01304		hsa-mir-15a	-3.46895		hsa-mir-141	-2.2037		hsa-mir-181a-1 // hsa-mir-181a-2	-2.04172
hsa-mir-1275	GUGGGGGAGAGGCUGUC					hsa-mir-146b	2.50245		hsa-mir-198	8.30225		hsa-mir-181d	-2.0222		hsa-mir-181a-1 // hsa-mir-181a-2	-2.30902		hsa-mir-149	3.28106		hsa-mir-185	-2.40692
hsa-mir-1281	UCGCCUCCUCCUCUCCC					hsa-mir-149	7.87399		hsa-mir-19b-1 // hsa-mir-19b-2	-2.39295		hsa-mir-18a	-2.36452		hsa-mir-181b-1 // hsa-mir-181b-2	-2.25313		hsa-mir-15a	-3.45739		hsa-mir-18a	-3.38252
hsa-mir-1308	GCAUGGGUGGUUCAGUGG					hsa-mir-155	-2.26367		hsa-mir-27b	-2.79309		hsa-mir-18b	-3.16924		hsa-mir-18a	-2.37341		hsa-mir-181a-1 // hsa-mir-181a-2	-2.13308		hsa-mir-196a-2 // hsa-mir-196a-1	-2.46489
hsa-mir-130a	CAGUGCAAUGUUAAAAGGGCAU					hsa-mir-193a	2.07909		hsa-mir-28	-2.85595		hsa-mir-193a	2.20376		hsa-mir-20b	-2.26399		hsa-mir-181d	-2.38369		hsa-mir-19b-1 // hsa-mir-19b-2	-3.4367
hsa-mir-132	UAACAGUCUACAGCCAUGGUCG					hsa-mir-196a-2 // hsa-mir-196a-1	-2.048		hsa-mir-339	-4.52635		hsa-mir-19b-1 // hsa-mir-19b-2	-2.87207		hsa-mir-221	-2.12636		hsa-mir-18b	-3.03303		hsa-mir-20b	-3.04071
hsa-mir-138-2 // hsa-mir-138-1	AGCUGGUGUUGUGAAUCAGGCCG					hsa-mir-203	2.54754		hsa-mir-342	-2.11957		hsa-mir-205	2.18011		hsa-mir-27a	-2.89277		hsa-mir-19b-1 // hsa-mir-19b-2	-2.37096		hsa-mir-210	-3.64412
hsa-mir-141	UAACACUGUCUGGUAAAGAUGG					hsa-mir-27a	-3.78337		hsa-mir-378	-3.40242		hsa-mir-221	-2.05764		hsa-mir-27b	-2.66984		hsa-mir-20b	-2.06977		hsa-mir-22	-3.54219
hsa-mir-146b	UGAGAACUGAAUUCCAUAGGCU					hsa-mir-27b	-2.85264		hsa-mir-432	6.13527		hsa-mir-224	-2.1393		hsa-mir-30a	-2.22268		hsa-mir-22	-2.11283		hsa-mir-25	-2.22643
hsa-mir-149	AGGGAGGGACGGGGGCUGUGC					hsa-mir-296	-2.15875		hsa-mir-455	2.2843		hsa-mir-27a	-6.42006		hsa-mir-324	-2.506		hsa-mir-296	-2.4069		hsa-mir-26a-2 // hsa-mir-26a-1	-2.22885
hsa-mir-149	UCUGGCUCCGUGUCUUCACUCCC					hsa-mir-30a	-2.09727		hsa-mir-500	3.50301		hsa-mir-27b	-2.52335		hsa-mir-378	-2.50737		hsa-mir-324	-2.30257		hsa-mir-27a	-2.59281
hsa-mir-151	CUAGACUGAAGCUCCUUGAGG					hsa-mir-339	-2.7605		hsa-mir-501	5.674		hsa-mir-30a	-2.89957		hsa-mir-638	4.40525		hsa-mir-422a	-2.01818		hsa-mir-27b	-3.27306
hsa-mir-152	UCAGUGCAUGACAGAACUUGG					hsa-mir-378	-2.63983		hsa-mir-503	-2.32481		hsa-mir-30c-1 // hsa-mir-30c-2	-2.18003		hsa-mir-663	6.49268		hsa-mir-455	2.2943		hsa-mir-30a	-2.29533
hsa-mir-155	UUAAUGCUAAUCGUGAUAGGGGU					hsa-mir-432	-2.6119		hsa-mir-551b	9.1752		hsa-mir-339	-2.03706		hsa-mir-671	-4.57264		hsa-mir-638	5.12009		hsa-mir-31	-2.13305
hsa-mir-15a	UAGCAGCACAUAAUGGUUUGUG					hsa-mir-500	-2.15023		hsa-mir-584	-2.58145		hsa-mir-422a	-2.2006		hsa-mir-768	2.26037		hsa-mir-663	5.42742		hsa-mir-378	-3.18735
hsa-mir-181a-1 // hsa-mir-181a-2	AACAUUCAACGCUGUCGGUGAGU					hsa-mir-503	-2.45558		hsa-mir-663	2.58687		hsa-mir-638	3.28933		hsa-mir-923	2.90652		hsa-mir-768	2.37161		hsa-mir-425	-2.22742
hsa-mir-181b-1 // hsa-mir-181b-2	AACAUUCAUUGCUGUCGGUGGGU					hsa-mir-638	6.3152		hsa-mir-671	-2.52516		hsa-mir-663	5.58206		hsa-mir-934	-2.98723		hsa-mir-923	2.73172		hsa-mir-638	5.37538
hsa-mir-181d	AACAUUCAUUGUUGUCGGUGGGU					hsa-mir-663	8.91624		hsa-mir-934	-2.30397		hsa-mir-768	2.86715					hsa-mir-934	-4.40327		hsa-mir-663	11.3323
hsa-mir-185	UGGAGAGAAAGGCAGUUCCUGA					hsa-mir-671	-2.46085		hsa-mir-99b	-5.60908		hsa-mir-923	2.30362					hsa-mir-939	2.21933		hsa-mir-671	-2.71629
hsa-mir-18a	UAAGGUGCAUCUAGUGCAGAUAG					hsa-mir-923	2.54729					hsa-mir-92b	3.08724								hsa-mir-768	5.4677
hsa-mir-18b	UAAGGUGCAUCUAGUGCAGUUAG					hsa-mir-92b	5.31879														hsa-mir-923	5.77562
hsa-mir-193a	UGGGUCUUUGCGGGCGAGAUGA																				hsa-mir-92b	2.82218
hsa-mir-196a-2 // hsa-mir-196a-1	UAGGUAGUUUCAUGUUGUUGGG
hsa-mir-198	GGUCCAGAGGGGAGAUAGGUUC
hsa-mir-19b-1 // hsa-mir-19b-2	UGUGCAAAUCCAUGCAAAACUGA
hsa-mir-203	GUGAAAUGUUUAGGACCACUAG
hsa-mir-205	UCCUUCAUUCCACCGGAGUCUG
hsa-mir-20b	CAAAGUGCUCAUAGUGCAGGUAG
hsa-mir-210	CUGUGCGUGUGACAGCGGCUGA
hsa-mir-22	AAGCUGCCAGUUGAAGAACUGU
hsa-mir-221	AGCUACAUUGUCUGCUGGGUUUC
hsa-mir-224	CAAGUCACUAGUGGUUCCGUU
hsa-mir-25	CAUUGCACUUGUCUCGGUCUGA
hsa-mir-26a-2 // hsa-mir-26a-1	UUCAAGUAAUCCAGGAUAGGCU
hsa-mir-27a	UUCACAGUGGCUAAGUUCCGC
hsa-mir-27b	UUCACAGUGGCUAAGUUCUGC
hsa-mir-28	AAGGAGCUCACAGUCUAUUGAG
hsa-mir-296	GAGGGUUGGGUGGAGGCUCUCC
hsa-mir-30a	UGUAAACAUCCUCGACUGGAAG
hsa-mir-30a	CUUUCAGUCGGAUGUUUGCAGC
hsa-mir-30c-1 // hsa-mir-30c-2	UGUAAACAUCCUACACUCUCAGC
hsa-mir-31	AGGCAAGAUGCUGGCAUAGCU
hsa-mir-324	ACUGCCCCAGGUGCUGCUGG
hsa-mir-324	CGCAUCCCCUAGGGCAUUGGUGU
hsa-mir-339	UCCCUGUCCUCCAGGAGCUCACG
hsa-mir-342	UCUCACACAGAAAUCGCACCCGU
hsa-mir-378	ACUGGACUUGGAGUCAGAAGG
hsa-mir-422a	ACUGGACUUAGGGUCAGAAGGC
hsa-mir-425	AAUGACACGAUCACUCCCGUUGA
hsa-mir-432	UCUUGGAGUAGGUCAUUGGGUGG
hsa-mir-455	GCAGUCCAUGGGCAUAUACAC
hsa-mir-500	UAAUCCUUGCUACCUGGGUGAGA
hsa-mir-501	AAUCCUUUGUCCCUGGGUGAGA
hsa-mir-503	UAGCAGCGGGAACAGUUCUGCAG
hsa-mir-551b	GAAAUCAAGCGUGGGUGAGACC
hsa-mir-584	UUAUGGUUUGCCUGGGACUGAG
hsa-mir-638	AGGGAUCGCGGGCGGGUGGCGGCCU
hsa-mir-663	AGGCGGGGCGCCGCGGGACCGC
hsa-mir-671	AGGAAGCCCUGGAGGGGCUGGAG
hsa-mir-768	UCACAAUGCUGACACUCAAACUGCUGAC
hsa-mir-768	GUUGGAGGAUGAAAGUACGGAGUGAU
hsa-mir-923	GUCAGCGGAGGAAAAGAAACU
hsa-mir-92b	AGGGACGGGACGCGGUGCAGUG
hsa-mir-934	UGUCUACUACUGGAGACACUGG
hsa-mir-939	UGGGGAGCUGAGGCUCUGGGGGUG
hsa-mir-99b	CACCCGUAGAACCGACCUUGCG

## Sheet: MDA-MB231 Genes
MDA-MB231 Different Passages (7)			MDA-MB231 Different Passages (7)
Uonion Genes			Intersection Genes			MDA Treated vs. MDA Un-treated				MDA P1 vs. MDA Un-treated				MDA P3 vs. MDA Un-treated				MDA P5 vs. MDA Un-treated				MDA P7 vs. MDA Un-treated				MDA P10 vs. MDA Un-treated
Gene Symbole	Gene Description		Gene Symbole	Gene Description		Gene Symbole	P-Value	Fold-Change		Gene Symbole	P-Value	Fold-Change		Gene Symbole	P-Value	Fold-Change		Gene Symbole	P-Value	Fold-Change		Gene Symbole	P-Value	Fold-Change		Gene Symbole	P-Value	Fold-Change
AADAC	arylacetamide deacetylase (esterase)		AADAC	arylacetamide deacetylase (esterase)		AADAC	4.24581e-09	3.37875		AADAC	6.78122e-11	4.63849		AADAC	1.83985e-10	4.27632		AADAC	3.09648e-10	4.10407		AADAC	6.59533e-11	4.64922		AADAC	1.38082e-09	3.6639
ABCA1	ATP-binding cassette, sub-family A (ABC		Ablim3	actin binding LIM protein family, membe		ABCA1	5.49841e-05	-2.18926		ACRC	4.87266e-18	12.9816		ACRC	3.41164e-13	4.34681		ALDH1A3	2.09028e-09	2.77165		ALDH1A3	5.20903e-09	2.63036		ALDH1A3	6.838e-08	2.29018
ACRC	acidic repeat containing		C15orf48	chromosome 15 open reading frame 48		ACRC	2.14942e-18	14.4113		ADAMTSL4	5.73072e-05	2.28659		AG2	1.03367e-06	2.82426		ALPP	0.000158449	-2.31521		ALPP	5.34589e-05	-2.51748		ALPP	0.00021471	-2.26192
ADAMTSL4	ADAMTS-like 4		C3	complement component 3		AQP3	4.31525e-05	2.21853		AG2	7.00522e-09	4.13798		ALDH1A3	1.41805e-08	2.48864		ANKRD30B	2.36212e-05	-3.3589		ANKRD30B	6.20724e-06	-3.8272		ANKRD30B	1.82798e-06	-4.32751
AG2	hypothetical protein LOC387763		C6orf105	chromosome 6 open reading frame 105		ARMC9	5.73704e-11	-2.37279		ALPP	0.000516325	-2.11509		ALPP	0.000150826	-2.32398		ATP10A	6.5833e-06	-2.94096		ATP10A	3.42839e-06	-3.09944		ASPHD2	6.02516e-10	2.14492
ALDH1A3	aldehyde dehydrogenase 1 family, member		CCL20	chemokine (C-C motif) ligand 20		Ablim3	7.2873e-12	5.12252		ANXA10	0.000247455	-2.14841		ANKRD30B	0.000873494	-2.38729		Ablim3	4.5649e-13	6.60186		Ablim3	1.57613e-12	5.8715		ASS1	0.000751104	2.0295
ALPP	alkaline phosphatase, placental (Regan		COL1A1	collagen, type I, alpha 1		Acot4	2.72383e-07	2.17657		ASS1	0.000133905	2.31054		ASS1	5.23735e-05	2.48096		Actg2	9.9891e-14	7.29131		Actg2	1.01016e-13	7.28305		ATP10A	5.47684e-05	-2.49192
ANKRD30B	ankyrin repeat domain 30B		COX7B2	cytochrome c oxidase subunit VIIb2		Adamts3	2.14811e-05	2.28179		ATP10A	0.000603858	-2.07602		ATP10A	5.83336e-06	-2.96953		Adamts3	0.00013946	2.02292		Akr1c1	2.26713e-05	2.87576		Ablim3	9.30386e-12	5.01628
ANXA10	annexin A10		CTHRC1	collagen triple helix repeat containing		C15orf48	8.9686e-05	2.6457		Ablim3	1.59134e-13	7.3315		Ablim3	9.8166e-14	7.70515		Akr1c1	9.46496e-07	3.78843		BICC1	0.000259034	-2.29268		Actg2	2.8893e-13	6.56453
AQP3	aquaporin 3 (Gill blood group)		CXCL1	chemokine (C-X-C motif) ligand 1 (melan		C1orf110	7.75758e-09	-3.09343		Adamts3	6.5374e-06	2.46824		Acpl2	1.69127e-10	2.02903		Apoc1	3.29985e-06	-2.07479		BIK	2.36027e-09	3.69834		Akr1c1	4.29367e-05	2.72659
ARMC9	armadillo repeat containing 9		Col6a3	collagen, type VI, alpha 3		C3	0.00083797	2.25362		Adora2a	5.34264e-07	2.21905		Actg2	7.03662e-13	6.03382		BICC1	0.000201575	-2.33868		BST2	0.00398041	-2.07085		BIK	3.71689e-09	3.57559
ASPHD2	aspartate beta-hydroxylase domain conta		Cyp24a1	cytochrome P450, family 24, subfamily A		C6orf105	8.00864e-08	2.20665		Akr1c1	9.2252e-06	3.10293		Adora2a	2.52541e-06	2.04776		BIK	2.23631e-09	3.71334		C10orf116	3.10212e-10	3.92778		BMP4	0.00051443	-2.13915
ASS1	argininosuccinate synthetase 1		DCAF4L1	WD repeat domain 21B		C6orf99	4.74431e-15	5.42973		BIK	8.67862e-09	3.36228		Akr1c1	1.91608e-08	5.50809		BMP4	0.000548252	-2.1286		C15orf48	1.00582e-08	6.23863		BST2	0.00124366	-2.31447
ATP10A	ATPase, class V, type 10A		DMBT1	deleted in malignant brain tumors 1		CCDC125	9.56181e-07	-2.078		BIRC3	0.000101049	2.78266		BIK	1.64998e-09	3.79965		BST2	0.00314303	-2.1186		C1orf110	3.01436e-09	-3.29729		C10orf116	3.56879e-09	3.29264
Ablim3	actin binding LIM protein family, membe		EFEMP2	EGF-containing fibulin-like extracellul		CCL20	7.37822e-05	9.35099		C10orf10	3.69465e-06	2.5192		BMP4	0.00116558	-2.00732		C10orf116	5.59924e-10	3.75796		C20orf56	6.59821e-06	-2.0262		C15orf48	4.01265e-09	6.90234
Acot4	acyl-CoA thioesterase 4		HSD11B1	hydroxysteroid (11-beta) dehydrogenase		CCL26	4.82264e-06	2.97246		C10orf116	6.31145e-06	2.0896		C10orf116	1.21339e-07	2.62133		C15orf48	4.35813e-08	5.3454		C21orf7	0.00178338	2.08196		C20orf56	2.9052e-07	-2.4015
Acpl2	acid phosphatase-like 2		ICAM1	intercellular adhesion molecule 1		CDH4	9.23739e-07	-3.29146		C15orf48	6.15873e-10	8.57866		C15orf48	5.33789e-10	8.72795		C1orf110	3.84411e-08	-2.79019		C3	5.45739e-11	12.727		C21orf63	2.63579e-05	2.21795
Actg2	actin, gamma 2, smooth muscle, enteric		IL1B	interleukin 1, beta		CFP	2.30132e-06	2.39024		C1orf110	4.39074e-08	-2.7671		C1orf110	1.16991e-08	-3.01087		C20orf56	1.01642e-07	-2.55184		C4BPB	1.76659e-05	-3.29647		C21orf7	0.00128058	2.14247
Adamts3	ADAM metallopeptidase with thrombospond		ITGBL1	integrin, beta-like 1 (with EGF-like re		CH25H	0.000996026	2.67013		C21orf7	0.000362328	2.38793		C20orf56	5.4414e-06	-2.04676		C21orf7	0.00168661	2.09205		CCDC3	5.42972e-08	-2.64955		C3	2.25662e-11	14.4015
Adora2a	adenosine A2a receptor		Il1a	interleukin 1, alpha		CHKB	0.00152687	-2.10115		C3	3.33301e-11	13.6288		C21orf7	0.00200878	2.06057		C3	1.20273e-10	11.4374		CCL20	1.0909e-05	13.575		C4BPB	9.85386e-06	-3.48198
Akr1c1	aldo-keto reductase family 1, member C1		KRT86	keratin 86		CLEC2B	4.97331e-08	-2.65823		C4BPA	3.07893e-07	2.6692		C3	1.32001e-12	22.1398		C4BPB	5.92309e-05	-2.9481		CD14	2.93254e-05	2.42823		C6orf105	1.33875e-07	2.15188
Apoc1	apolipoprotein C-I		LAPTM5	lysosomal multispanning membrane protei		COL1A1	1.34889e-10	6.3138		C4orf19	2.34789e-05	2.03367		C4BPB	0.000858155	-2.31378		C4orf26	0.00205234	2.60251		CFB	0.00220886	2.69452		C7orf58	0.000436723	2.06574
BICC1	bicaudal C homolog 1 (Drosophila)		LOC100133632	family with sequence similarity 101, me		COX7B2	2.57369e-10	28.4737		C4orf26	5.27266e-06	5.18542		C4orf26	1.2535e-05	4.67644		C6orf105	1.37748e-07	2.14891		CLDN2	1.60144e-07	-7.18917		CCDC3	5.8485e-08	-2.63776
BIK	BCL2-interacting killer (apoptosis-indu		LOC201651	similar to arylacetamide deacetylase (A		CST6	2.54934e-16	5.71634		C5orf4	0.000183204	2.31032		C5orf4	9.15696e-06	2.92603		C6orf99	6.72846e-12	3.21098		CNKSR3	2.93316e-08	-2.09626		CCL20	3.21331e-06	17.3561
BIRC3	baculoviral IAP repeat-containing 3		MMP3	matrix metallopeptidase 3 (stromelysin		CTHRC1	1.51049e-07	4.11675		C6orf105	4.06357e-08	2.28263		C6orf105	1.67566e-09	2.70698		C7orf58	0.000186177	2.19813		COL1A1	3.27609e-09	4.66867		CFP	1.97398e-05	2.10196
BMP4	bone morphogenetic protein 4		NXT2	nuclear transport factor 2-like export		CXCL1	0.00592628	3.17658		C6orf99	1.79985e-14	4.86605		C7orf58	0.000432446	2.06723		CCDC3	6.07684e-08	-2.63172		COX7B2	1.58522e-11	49.1392		CLDN2	1.69181e-08	-9.63709
BST2	bone marrow stromal cell antigen 2		PLA2G4C	phospholipase A2, group IVC (cytosolic,		Cabyr	1.85419e-15	6.61616		CCL20	7.14643e-08	39.372		C9orf16	2.71443e-05	2.03443		CCL20	2.05016e-05	11.9876		CSF3	1.12786e-11	27.5986		CNKSR3	3.49899e-08	-2.07978
C10orf10	chromosome 10 open reading frame 10		POLM	polymerase (DNA directed), mu		Celsr3	5.26526e-05	-2.37832		CCL26	2.42941e-05	2.62022		CCDC3	2.3425e-07	-2.4319		CD14	0.000339803	2.04288		CST1	3.95514e-07	5.02242		COL1A1	3.41995e-07	3.19046
C10orf116	chromosome 10 open reading frame 116		Plac1	placenta-specific 1		Chst9	7.93702e-07	-2.59546		CDH4	4.91309e-05	-2.42467		CCL20	3.29683e-07	28.0149		CD82	8.02625e-05	2.00882		CST2	1.8421e-09	4.01265		COX7B2	1.49392e-11	49.748
C15orf48	chromosome 15 open reading frame 48		Plcb4	phospholipase C, beta 4		Col6a3	0.00212669	2.38925		CDKN1A	6.65638e-07	2.47087		CD14	2.3127e-06	2.92595		CLDN2	1.95402e-07	-7.01235		CST4	1.39521e-09	3.25414		CSF3	9.85951e-13	43.3652
C1orf110	chromosome 1 open reading frame 110		RTEL1	tumor necrosis factor receptor superfam		Cyp24a1	1.42483e-07	7.59005		CFB	9.97478e-05	3.89985		CDKN1A	1.24566e-05	2.08352		CNKSR3	2.91671e-08	-2.09679		CTHRC1	8.77808e-07	3.52926		CST1	1.79996e-06	4.29282
C20orf56	chromosome 20 open reading frame 56		Robo4	roundabout homolog 4, magic roundabout		DCAF12L1	1.34949e-14	26.2378		CFP	4.21523e-06	2.3038		CFB	1.23878e-05	5.0245		COL1A1	1.16468e-09	5.12763		CTSS	2.77727e-05	2.92351		CST2	2.89092e-07	2.78235
C21orf63	chromosome 21 open reading frame 63		S100P	S100 calcium binding protein P		DCAF4L1	1.49215e-12	10.5672		CH25H	9.6423e-05	3.4335		CLDN2	3.01929e-07	-6.64427		COX7B2	1.71211e-11	48.3622		CXCL1	1.03623e-06	12.9597		CST4	4.96034e-08	2.60129
C21orf7	chromosome 21 open reading frame 7		SAA4	serum amyloid A4, constitutive		DEPDC7	3.30437e-07	2.03123		CLDN1	4.10318e-05	2.32859		CNKSR3	3.21615e-08	-2.08763		CSF3	1.8463e-11	25.3288		CXCL2	0.000491919	3.5663		CTHRC1	2.07356e-05	2.72396
C3	complement component 3		SERPINB2	serpin peptidase inhibitor, clade B (ov		DKK3	1.56027e-07	2.8003		CLDN2	0.000104853	-3.40387		COL1A1	3.53186e-10	5.74089		CST1	5.63473e-07	4.83865		CXCR4	1.23998e-10	-6.33427		CTSS	1.21415e-05	3.14142
C4BPA	complement component 4 binding protein,		SLC7A7	solute carrier family 7 (cationic amino		DMBT1	1.47688e-06	-3.36588		COL1A1	1.60571e-10	6.20428		COX7B2	8.60719e-12	55.8635		CST2	4.42448e-09	3.74768		CYFIP2	6.46476e-08	-2.12212		CXCL1	2.75668e-07	16.3971
C4BPB	complement component 4 binding protein,		SPHK1	sphingosine kinase 1		Ddx60	5.64253e-06	2.3126		COX7B2	2.81936e-11	43.6725		CSF3	1.41187e-12	40.45		CST4	2.13287e-09	3.16367		Cabyr	1.34507e-12	3.86667		CXCL2	2.95685e-05	5.14158
C4orf19	chromosome 4 open reading frame 19		SSX1	synovial sarcoma, X breakpoint 1		EFEMP2	1.82349e-09	2.92518		CSF3	2.4248e-12	36.4982		CST1	2.70396e-08	6.75651		CTHRC1	1.3593e-06	3.40091		Cd8a	1.25091e-05	-2.02142		CXCR4	1.06717e-09	-5.14526
C4orf26	chromosome 4 open reading frame 26		STC2	stanniocalcin 2		EID3	4.76126e-08	2.61379		CST1	5.45367e-07	4.85524		CST2	5.73388e-11	5.38812		CTSS	9.177e-05	2.63951		Chst9	4.3188e-11	-5.49555		Col6a3	3.27123e-08	8.22013
C5orf4	chromosome 5 open reading frame 4		Sema3e	sema domain, immunoglobulin domain (Ig)		ESRP2	1.17951e-05	2.02737		CST2	1.35927e-10	4.98778		CST4	1.40357e-10	3.82248		CXCL1	1.71673e-06	11.8753		Col6a3	5.97945e-09	10.288		Csf2	0.000303355	3.12346
C6orf105	chromosome 6 open reading frame 105		Slc14a1	solute carrier family 14 (urea transpor		FADS2	1.90965e-05	-2.04435		CST4	6.88923e-10	3.41386		CTHRC1	6.36101e-07	3.62794		CXCL2	0.00261645	2.86991		Csf2	0.00419561	2.33225		Cxcl3	3.46672e-07	13.4666
C6orf99	similar to Putative uncharacterized pro		Sox15	SRY (sex determining region Y)-box 15		FAM155A	4.04806e-05	-2.14793		CST6	1.82858e-13	3.50154		CTSS	3.47231e-07	4.34771		CXCR4	5.42696e-10	-5.48207		Cxcl3	1.97781e-05	7.02727		Cyp24a1	3.79179e-05	3.90484
C7orf58	chromosome 7 open reading frame 58		TCN1	transcobalamin I (vitamin B12 binding p		FZD4	2.61167e-10	2.04956		CTHRC1	7.28398e-07	3.58598		CXCL1	1.44438e-07	18.4568		CYFIP2	1.37566e-07	-2.04963		Cyp24a1	1.40746e-05	4.36625		DCAF4L1	6.03889e-10	5.51585
C9orf16	chromosome 9 open reading frame 16		TFPI2	tissue factor pathway inhibitor 2		Fut1	2.18446e-05	2.15879		CTSS	1.05197e-06	3.91571		CXCL2	2.81044e-05	5.17622		CYP1B1	7.16014e-07	2.08824		DCAF12L1	2.33225e-06	3.05724		DENND2A	2.15265e-09	3.33381
CCDC125	coiled-coil domain containing 125		TSPYL5	TSPY-like 5		GABARAPL1	2.61415e-09	2.17149		CXCL1	1.11771e-07	19.357		CXCR4	1.38775e-08	-4.10377		Cabyr	5.76594e-13	4.10834		DCAF4L1	7.3866e-11	6.80069		DMBT1	3.37907e-05	-2.61416
CCDC3	coiled-coil domain containing 3		VCAN	versican		GBP2	0.00048873	-2.12356		CXCL2	4.41526e-06	6.64115		Chst9	7.41459e-11	-5.23248		Cd8a	2.93659e-06	-2.18847		DENND2A	9.89303e-10	3.52011		Dhrs3	3.78071e-08	6.06418
CCL20	chemokine (C-C motif) ligand 20		Vnn1	vanin 1		GGT5	2.01618e-05	-2.11829		Cabyr	4.89369e-15	6.05022		Col6a3	4.9395e-08	7.80037		Chst9	3.84051e-11	-5.55522		DKK3	2.27293e-05	2.0656		Dner	4.09538e-06	3.33223
CCL26	chemokine (C-C motif) ligand 26		as3mt	arsenic (+3 oxidation state) methyltran		Galntl4	2.44443e-07	-2.01239		Chst9	2.26256e-08	-3.30459		Csf2	0.00156945	2.60454		Col6a3	9.29267e-09	9.69331		DMBT1	0.000751408	-2.05828		EFEMP2	1.01435e-08	2.64221
CD14	CD14 molecule		fermt3	fermitin family homolog 3 (Drosophila)		Gdf15	0.000618079	-2.54886		Col6a3	0.00012146	3.22117		Cxcl3	1.73904e-07	15.1592		Cxcl3	4.16016e-05	6.27388		Dhrs3	1.62883e-09	8.74683		ENG	7.6348e-08	2.31412
CD82	CD82 molecule		fhl1	four and a half LIM domains 1		Gramd2	5.80959e-08	3.45146		Csf2	2.64877e-05	4.09763		Cyp24a1	5.55533e-05	3.74211		Cyp24a1	4.66302e-06	4.95789		Dner	1.50223e-06	3.64004		EYA4	2.6672e-11	2.16093
CDH4	cadherin 4, type 1, R-cadherin (retinal		gmfg	glia maturation factor, gamma		HDAC4	4.21268e-10	-2.4768		Cxcl3	7.25888e-08	17.6785		DCAF12L1	2.62822e-08	4.45842		DCAF12L1	1.46642e-07	3.83394		EFEMP2	4.03072e-09	2.78854		FAM133A	1.25457e-05	3.04892
CDKN1A	cyclin-dependent kinase inhibitor 1A (p		hoxb5	homeobox B5		HIST1H2AL	1.38055e-06	2.18971		Cyp24a1	3.84023e-06	5.07152		DCAF4L1	1.75948e-12	10.3566		DCAF4L1	7.86412e-12	8.68061		ENG	1.3212e-07	2.24936		FAM24B	6.31606e-07	-2.18364
CFB	complement factor B		lat	linker for activation of T cells		HIST1H2BG	3.90449e-05	2.30526		DCAF12L1	2.65655e-12	12.0957		DENND2A	3.07265e-08	2.80025		DENND2A	1.65431e-09	3.39516		EYA4	9.90573e-11	2.05001		FBXO32	7.68876e-08	3.09927
CFP	complement factor properdin		mael	maelstrom homolog (Drosophila)		HIST1H2BG	5.52978e-05	2.0867		DCAF4L1	3.73361e-13	12.5892		DKK3	4.92365e-09	3.56046		DHCR7	8.50795e-08	-2.04553		Ehf	0.000478536	2.21678		FLJ32255	7.09989e-08	2.36003
CH25H	cholesterol 25-hydroxylase		mettl7a	methyltransferase like 7A		HIST2H2BE	3.45566e-06	2.57116		DKK3	5.54471e-10	4.21271		DMBT1	6.83477e-06	-2.96775		DKK3	1.89955e-06	2.39194		FAM133A	9.6959e-05	2.56785		Fkbp10	8.85084e-13	5.75158
CHKB	carnitine palmitoyltransferase 1B (musc		pcsk9	proprotein convertase subtilisin/kexin		HOXB6	4.0661e-09	3.60769		DMBT1	8.19225e-07	-3.53766		Dhrs2	5.68775e-07	3.07611		DMBT1	0.000231146	-2.25296		FAM24B	1.7087e-07	-2.34079		Fst	2.05884e-06	-3.33985
CLDN1	claudin 1		scd	stearoyl-CoA desaturase (delta-9-desatu		HPSE	7.22779e-08	2.20976		Ddx60	3.04008e-06	2.40301		Dhrs3	8.119e-11	12.957		Dhrs3	1.07856e-08	6.98299		FBXO32	5.91024e-08	3.15748		G0s2	0.000485929	2.27997
CLDN2	claudin 2		socs2	suppressor of cytokine signaling 2		HSD11B1	8.7541e-07	4.65924		Dhrs2	3.38058e-06	2.70146		Dner	4.82142e-07	4.03517		Dner	1.26569e-06	3.69626		FCGBP	5.02832e-05	2.70616		GJA1	1.80432e-06	-3.82546
CLEC2B	C-type lectin domain family 2, member B		sytl3	synaptotagmin-like 3		HTRA1	0.000227939	-2.23565		Dhrs3	1.63521e-06	4.10487		EFEMP2	1.32261e-09	2.98362		EFEMP2	1.15811e-09	3.00835		FHDC1	9.27221e-06	2.16485		GNG2	6.20435e-06	2.09326
CNKSR3	CNKSR family member 3		thbs2	thrombospondin 2		Hist1h2bh	3.08289e-07	2.74267		Dner	3.11258e-05	2.80386		ENG	8.09948e-09	2.6139		ENG	3.87751e-08	2.39843		FLJ32255	1.4033e-07	2.27674		GPR1	0.000116267	-2.50053
COL1A1	collagen, type I, alpha 1		tpm2	tropomyosin 2 (beta)		Hspa2	1.62519e-16	8.50746		EFEMP2	1.75184e-09	2.93237		Ehf	0.000115429	2.48658		Ehf	0.000640516	2.16525		Fbp1	0.000131891	-2.5121		GPR56	3.68635e-07	2.33008
COX7B2	cytochrome c oxidase subunit VIIb2					ICAM1	7.33385e-06	2.78871		EID3	2.58289e-07	2.37207		FAM133A	1.22862e-05	3.05437		FAM133A	5.01798e-05	2.71234		Fkbp10	7.2707e-13	5.85539		Gdf15	0.000579405	-2.56495
CSF3	colony stimulating factor 3 (granulocyt					ID2	4.42712e-07	2.65889		ENG	6.4233e-08	2.33515		FAM24B	1.21346e-08	-2.71962		FAM24B	1.21835e-07	-2.38437		Fst	2.9048e-07	-3.95853		HLA-B	1.39987e-06	2.00416
CST1	cystatin SN					IFFO1	5.5953e-10	2.43308		Evi2a	0.00372175	-2.72287		FBXO32	1.6304e-07	2.9414		FBXO32	8.14476e-07	2.64077		GJA1	1.49818e-05	-3.15489		HLA-DRA	3.21489e-05	3.28298
CST2	cystatin SA					IFI44	0.000387874	2.07155		FAM122C	7.77045e-10	2.83153		FCGBP	2.98918e-05	2.82641		FCGBP	1.87818e-05	2.93927		GNG11	5.84041e-06	2.10335		HSD11B1	3.41588e-09	8.75999
CST4	cystatin S					IFIH1	0.000244491	2.42317		FAM133A	0.000629798	2.20111		FHDC1	9.14289e-06	2.16663		FLJ32255	1.72074e-08	2.55009		GNG2	1.82503e-06	2.23985		Hecw2	1.10866e-06	2.10366
CST6	cystatin E/M					IFIT1	0.000174246	2.60757		FAM24B	6.37445e-07	-2.18259		FLJ32255	1.25087e-08	2.59631		Fbp1	0.000156326	-2.47697		GPR1	0.000124727	-2.48624		ICAM1	2.23047e-07	3.68581
CTHRC1	collagen triple helix repeat containing					IL1B	0.000440708	3.7743		FAM40B	0.00137396	-2.26931		FZD4	3.59142e-10	2.02401		Fkbp10	1.88037e-13	6.65009		GPR56	3.31513e-06	2.07105		IL12RB1	3.3604e-09	3.26383
CTSS	cathepsin S					IL32	0.000564041	2.03659		FLJ20444	0.00674473	-2.00369		FZD7	7.42747e-06	-2.00243		Fst	7.73056e-08	-4.46649		Gdf15	0.00262694	-2.21182		IL1B	1.18935e-10	41.611
CXCL1	chemokine (C-X-C motif) ligand 1 (melan					INSIG1	2.46335e-09	-3.08503		FLJ32255	3.33644e-08	2.4583		Fbp1	3.70892e-05	-2.79264		GJA1	0.000297702	-2.43198		HIST2H2BE	1.22966e-05	2.36237		IL6	0.00309033	3.17982
CXCL2	chemokine (C-X-C motif) ligand 2					IRF7	5.24918e-06	2.53881		FZD4	3.54658e-13	2.76948		Fkbp10	1.86169e-13	6.65653		GNG11	5.2416e-06	2.11585		HLA-B	1.04715e-06	2.03233		IL8	0.00058524	5.1702
CXCR4	chemokine (C-X-C motif) receptor 4					ISG20	0.000115101	2.92107		Fas	2.83011e-07	2.22795		Fst	7.20032e-08	-4.49619		GNG2	2.93369e-06	2.18128		HLA-DRA	1.05771e-05	3.65851		IRAK2	6.78889e-07	2.38687
CYFIP2	cytoplasmic FMR1 interacting protein 2					ITGBL1	1.53129e-08	2.3796		Fkbp10	4.86958e-12	4.95601		GNG11	2.16837e-06	2.22192		Gdf15	0.000678077	-2.52596		HNF1B	0.000119037	-2.04936		ITGBL1	1.59083e-13	5.04652
CYP1B1	cytochrome P450, family 1, subfamily B,					Id3	7.16061e-12	4.36257		Fut1	2.57787e-05	2.13714		GNG2	3.13147e-07	2.4791		HIST2H2BE	4.04328e-06	2.54402		HSD11B1	8.39912e-09	7.84073		Il1a	9.38592e-10	24.2562
Cabyr	calcium binding tyrosine-(Y)-phosphoryl					Ifit2	7.14426e-06	2.4121		GABARAPL1	1.70701e-09	2.21344		GPNMB	1.58242e-05	2.49123		HLA-B	5.00198e-07	2.1069		ICAM1	2.54706e-06	3.0262		Inhbb	1.05855e-08	-3.87331
Cd8a	CD8a molecule					Il1a	6.18945e-05	4.59953		GGTLC1	1.57966e-05	2.55225		GPR1	0.000119521	-2.4949		HLA-DRA	1.06933e-05	3.65458		IL12RB1	1.10762e-07	2.60843		KIAA1199	3.77336e-06	-2.17412
Celsr3	cadherin, EGF LAG seven-pass G-type rec					KISS1	2.85608e-09	4.1768		GPNMB	3.12833e-06	2.80022		Gramd2	9.60933e-05	2.06981		HNF1B	9.2461e-05	-2.08283		IL1B	2.84353e-10	34.9555		KRT86	1.60207e-06	2.6869
Chst9	carbohydrate (N-acetylgalactosamine 4-0					KRT17	3.05706e-10	5.20828		Gramd2	4.84662e-07	2.95052		HIST1H2BG	0.000106677	2.15251		HOXB6	1.56812e-09	3.87751		IRAK2	7.25401e-07	2.37769		Kynu	2.56598e-05	2.49659
Col6a3	collagen, type VI, alpha 3					KRT86	1.18233e-06	2.74361		HIST1H2AL	1.11566e-09	3.37184		HIST1H2BG	3.48164e-05	2.14757		HSD11B1	7.04534e-09	8.01007		ITGA10	0.00020918	2.0465		LAMC2	1.09093e-05	3.09227
Csf2	colony stimulating factor 2 (granulocyt					LAMP3	0.000669185	2.64693		HIST1H2BD	1.99529e-07	2.62103		HIST2H2BE	3.04214e-09	4.37139		Hecw2	4.98845e-07	2.19165		ITGBL1	1.31015e-13	5.12856		LAPTM5	2.1117e-08	6.48786
Cxcl3	chemokine (C-X-C motif) ligand 3					LAPTM5	8.09411e-07	4.41016		HIST1H2BG	3.90525e-06	2.70923		HLA-B	2.98021e-07	2.16182		Hist1h2bh	4.9971e-06	2.30073		Ier5l	3.29679e-06	2.14566		LOC100133632	1.71072e-13	8.57132
Cyp24a1	cytochrome P450, family 24, subfamily A					LIMD2	2.48186e-11	2.70381		HIST1H2BG	6.72302e-07	2.77563		HLA-DRA	0.000358228	2.61004		ICAM1	2.53483e-05	2.53983		Il1a	8.03501e-09	16.7469		LOC201651	2.86802e-07	3.72583
DCAF12L1	WD repeat domain 40B					LOC100128288	0.000101978	-2.30552		HIST2H2BE	2.68701e-11	6.7988		HOXB6	4.24559e-10	4.29959		IL12RB1	1.04615e-08	3.02521		Inhbb	6.74658e-09	-4.01682		LOC440459	5.27387e-05	4.52476
DCAF4L1	WD repeat domain 21B					LOC100133632	1.23737e-15	15.706		HLA-B	5.23431e-07	2.1022		HSD11B1	1.9797e-09	9.38636		IL1B	4.12594e-10	32.5079		Irx5	3.84003e-05	-2.02716		LOC645638	1.09651e-07	5.23432
DENND2A	DENN/MADD domain containing 2A					LOC201651	3.34887e-09	5.61152		HOXB6	1.66321e-09	3.85998		Hecw2	4.45723e-08	2.49649		INSIG1	4.35656e-08	-2.58676		KRT86	9.02033e-08	3.29972		LOC654433	2.00048e-05	2.75144
DEPDC7	DEP domain containing 7					LY6K	1.22806e-10	3.06362		HSD11B1	1.29066e-09	9.91883		Hist1h2bh	3.01295e-07	2.74681		IRAK2	2.58524e-06	2.21128		Kynu	1.21538e-05	2.63791		Lamb3	0.00012565	2.30937
DHCR7	7-dehydrocholesterol reductase					LYPD3	2.70548e-09	2.65099		HTRA1	0.000142126	-2.31735		ICAM1	1.33425e-07	3.84958		ITGBL1	2.63433e-13	4.84254		LAMC2	0.000195256	2.42777		Lcn2	1.12647e-08	10.4701
DKK3	dickkopf homolog 3 (Xenopus laevis)					MAMDC2	0.000437755	2.48784		Hecw2	5.07991e-08	2.47829		IFFO1	2.52151e-08	2.04029		Il1a	4.18377e-09	18.6836		LAPTM5	2.1766e-08	6.46583		MAL2	3.69497e-05	-2.3442
DMBT1	deleted in malignant brain tumors 1					MANSC1	6.80002e-05	2.12164		Hist1h1c	3.91679e-06	2.44017		IL12RB1	5.31365e-07	2.37848		Inhbb	1.33274e-08	-3.8028		LOC100133632	1.13757e-13	8.96784		MED24	2.54639e-12	2.69443
Ddx60	DEAD (Asp-Glu-Ala-Asp) box polypeptide					MLLT11	1.82516e-11	3.98379		Hist1h2bh	8.3314e-09	3.52737		IL1B	4.88626e-11	50.0356		Irx5	2.18687e-05	-2.09479		LOC201651	6.26804e-07	3.4881		MFAP2	1.89119e-05	2.83008
Dhrs2	dehydrogenase/reductase (SDR family) me					MMP3	3.38425e-07	6.28504		Hspa2	1.53742e-14	5.5106		IL6	0.00123772	3.63634		KIAA1199	1.94689e-07	-2.58359		LOC440459	2.3987e-06	6.76846		MFGE8	3.66047e-08	-2.21096
Dhrs3	dehydrogenase/reductase (SDR family) me					MT1G	0.00149178	2.28802		ICAM1	8.35082e-10	6.1821		IL8	0.000358053	5.62033		KRT86	4.42957e-08	3.48189		LOC645638	2.82178e-08	6.04865		MMP3	8.2516e-08	7.47266
Dner	delta/notch-like EGF repeat containing					MUC1	6.59161e-07	2.65062		IFFO1	6.38854e-10	2.41715		INSIG1	8.2477e-09	-2.85825		Kynu	3.87437e-05	2.42267		LOC654433	3.5173e-05	2.63097		Matn2	5.14927e-07	-2.87775
EFEMP2	EGF-containing fibulin-like extracellul					NANOS1	9.87292e-07	2.08477		IFI44	0.000299406	2.11065		IQCD	2.85623e-06	2.75483		LAMC2	0.000477182	2.25543		Lcn2	9.29082e-09	10.7555		Mxra8	4.2422e-09	-3.48289
EID3	EP300 interacting inhibitor of differen					NMB	9.69723e-08	2.31486		IFIH1	4.50064e-05	2.79595		IRAK2	1.00352e-07	2.67668		LAPTM5	1.54002e-08	6.72366		Lrrc61	2.72319e-06	-2.00137		NFKBIA	6.63676e-06	2.40553
ENG	endoglin					NTNG2	7.3833e-05	-2.0099		IGFBP6	9.91523e-09	2.65938		ISG20	0.00372596	2.09611		LOC100133632	6.68336e-14	9.52419		Ltbp1	1.47683e-05	2.00369		NXT2	5.85784e-10	2.70077
ESRP2	epithelial splicing regulatory protein					NXT2	1.03096e-10	2.98463		IL12RB1	3.78464e-09	3.2375		ITGBL1	4.93303e-12	3.87648		LOC201651	3.03645e-08	4.54497		MANSC1	9.77603e-05	2.07279		Nedd9	2.83635e-06	-2.09437
EYA4	eyes absent homolog 4 (Drosophila)					OASL	0.00127325	2.25048		IL1B	1.44467e-10	40.0025		Ifitm1	0.00421118	2.29383		LOC440459	2.11361e-06	6.88509		MED24	4.93148e-13	2.94261		Nrk	6.30993e-06	-2.30121
Ehf	ets homologous factor					PF4	3.87732e-07	2.61486		IL23A	1.76758e-07	5.67251		Il1a	4.97285e-10	27.2286		LOC645638	2.26659e-08	6.19544		MFAP2	1.53732e-06	3.49345		PAPPAS	2.61185e-05	2.68903
Evi2a	ecotropic viral integration site 2A					PLA2G4C	6.02582e-07	3.88394		IL32	5.39826e-06	2.88172		Impa2	7.39798e-06	2.00131		LOC654433	2.60775e-05	2.69403		MFGE8	1.20616e-07	-2.0894		PBX1	0.000117558	-2.15325
FADS2	fatty acid desaturase 2					PLXDC2	7.81651e-05	-2.14112		IL6	0.000127768	5.05414		Inhbb	2.5922e-08	-3.60929		Lcn2	9.45311e-09	10.7295		MLLT11	1.71775e-07	2.26297		PCDH7	9.3103e-08	-2.6781
FAM122C	family with sequence similarity 122C					POLM	2.08096e-10	3.00621		IL8	0.000162837	6.42623		Irx5	1.93157e-05	-2.1101		MANSC1	0.00010012	2.06963		MMP3	1.99064e-07	6.70157		PI3	5.18604e-05	4.5835
FAM133A	family with sequence similarity 133, me					PSG4	1.77278e-05	2.50555		INHBA	0.00400186	2.23175		JUP	1.59472e-06	2.56914		MED24	2.62631e-13	3.04904		MTMR11	3.40432e-07	2.08731		PION	6.93844e-08	2.09956
FAM155A	family with sequence similarity 155, me					Pabpc4l	7.04441e-06	2.25001		INSIG1	6.45979e-09	-2.90192		KIAA1199	7.83721e-08	-2.73277		MFAP2	3.4668e-07	3.98466		Matn2	1.98791e-06	-2.62279		PLA2G4C	1.51453e-05	2.93719
FAM24B	family with sequence similarity 24, mem					Plac1	2.59345e-06	2.52212		IQCD	6.77237e-07	3.06178		KRT86	2.79044e-08	3.60816		MFGE8	1.88263e-07	-2.0469		Mxra8	5.4875e-08	-2.9182		POLM	1.80714e-08	2.34561
FAM40B	family with sequence similarity 40, mem					Plcb4	8.17972e-15	8.95861		IRAK2	2.35885e-07	2.54087		Kynu	4.02322e-07	3.43326		MLLT11	4.52022e-09	2.76872		NFKBIA	0.000114115	2.00907		POPDC3	7.22594e-07	2.04892
FBXO32	F-box protein 32					Plxna2	0.000279178	2.02777		ISG20	1.06921e-05	3.67768		LAMC2	0.000464399	2.26048		MMP3	1.50956e-08	9.30598		NXT2	5.90277e-10	2.69962		PSG4	3.74183e-05	-2.37548
FCGBP	Fc fragment of IgG binding protein					RBMS3	2.07613e-06	-2.90823		ITGBL1	3.78907e-10	2.92156		LAPTM5	1.07584e-08	7.00544		Matn2	2.52186e-06	-2.58119		Nedd9	4.03696e-06	-2.05608		PSG9	5.14476e-14	-7.18177
FHDC1	FH2 domain containing 1					RBP7	8.36236e-09	3.45041		Ifit2	4.45604e-05	2.14433		LOC100133632	1.36398e-13	8.78834		Mxra8	5.64622e-07	-2.51614		Ngf	5.34532e-07	-2.50132		Pak6	7.89785e-11	2.873
FLJ20444	hypothetical protein FLJ20444					RGS9	6.70855e-06	2.77408		Ifitm1	0.00252143	2.42783		LOC201651	1.27196e-08	4.92938		NRIP1	8.70225e-09	2.06111		PAPPAS	3.21456e-06	3.18552		Pde2a	1.10003e-07	2.70083
FLJ32255	hypothetical protein LOC643977					RTEL1	3.97147e-11	3.42127		Il1a	5.80647e-10	26.4644		LOC440459	0.000108986	4.12885		NXT2	9.9408e-11	2.99112		PCDH7	4.93595e-07	-2.42284		Plac1	4.04978e-05	2.11832
FZD4	frizzled homolog 4 (Drosophila)					Robo4	0.000117277	2.1403		Inhbb	4.75255e-05	-2.14247		LOC645638	6.50391e-11	12.7216		Nedd9	5.34751e-06	-2.0263		PI3	1.77568e-05	5.26132		Plcb4	6.90881e-13	5.75245
FZD7	frizzled homolog 7 (Drosophila)					S100P	2.70248e-10	8.05816		Iqcg	2.1197e-07	2.0513		LOC654433	5.16871e-07	3.72823		Ngf	1.21426e-06	-2.38099		PION	3.34511e-08	2.17219		Pou2f2	1.35834e-11	3.76067
Fas	Fas (TNF receptor superfamily, member 6					SAA4	0.000636443	2.86403		JUP	4.58578e-06	2.40002		LYPD3	7.78189e-10	2.84752		PAPPAS	2.13506e-06	3.29585		PLA2G4C	3.67242e-05	2.72944		Prr16	0.000961157	-2.22176
Fbp1	fructose-1,6-bisphosphatase 1					SAMD9	4.1101e-05	2.42384		KIAA1462	2.12255e-05	2.08141		Lcn2	1.12844e-10	21.0814		PBX1	0.000145273	-2.12233		POLM	6.81348e-08	2.19529		Ptgs1	4.19439e-07	-2.5757
Fkbp10	FK506 binding protein 10, 65 kDa					SBSN	1.41038e-07	3.8887		KISS1	1.28671e-07	3.11756		MANSC1	0.000112974	2.05369		PCDH7	3.28975e-06	-2.17461		POPDC3	3.99793e-07	2.10863		RASSF2	0.000134642	-2.1015
Fst	follistatin					SCN9A	5.89003e-09	-2.38296		KRT17	8.87064e-11	5.84807		MED24	2.1065e-12	2.72113		PI3	2.3494e-06	6.88069		PSG9	1.84872e-11	-4.27531		RCN3	2.62946e-08	2.05595
Fut1	fucosyltransferase 1 (galactoside 2-alp					SDK1	1.43273e-10	-2.95543		KRT86	2.1101e-06	2.63689		MERTK	1.0581e-05	-2.15191		PLA2G4C	3.04492e-05	2.77188		PTGS2	0.00112006	3.08287		RTEL1	4.50646e-10	2.93583
G0s2	G0/G1switch 2					SELM	2.57021e-06	2.13492		Kynu	1.2217e-06	3.1425		MFAP2	3.40905e-07	3.99071		POLM	1.13614e-07	2.14166		Pak6	8.49627e-11	2.86102		Rcsd1	1.75843e-05	-2.56049
GABARAPL1	GABA(A) receptor-associated protein lik					SERPINB2	8.68278e-07	7.24243		LAMC2	9.02798e-05	2.58778		MLLT11	1.19205e-11	4.11201		POPDC3	1.51588e-07	2.21276		Pde2a	2.56876e-07	2.56322		Robo4	5.59029e-07	3.13012
GBP2	guanylate binding protein 2, interferon					SIGIRR	2.54896e-10	3.03886		LAMP3	0.00170021	2.40551		MMP3	6.36461e-10	14.5516		PSG9	1.68131e-09	-3.10752		Plac1	5.15046e-05	2.0871		S100P	0.000290722	2.24822
GGT5	gamma-glutamyltransferase 5					SLC1A3	0.00146849	2.46187		LAPTM5	5.75798e-08	5.80714		MUC1	2.25834e-06	2.44959		PTGS2	0.0020572	2.85568		Plcb4	5.36803e-13	5.88592		S100Z	1.85136e-07	3.10804
GGTLC1	gamma-glutamyltransferase light chain 1					SLC22A3	0.00185932	-2.01829		LIMD2	5.51665e-10	2.31567		Matn2	1.43851e-05	-2.3024		Pak6	2.1356e-11	3.10291		Plxnd1	6.56246e-10	2.41537		SAA4	1.23812e-06	5.81041
GJA1	gap junction protein, alpha 1, 43kDa					SLC6A8	2.5338e-07	2.20345		LOC100133632	3.20817e-14	10.3736		Mxra8	1.31396e-05	-2.0909		Pde2a	3.58742e-06	2.19648		Pou2f2	1.08048e-09	2.83697		SELENBP1	4.74641e-06	-2.90825
GNG11	guanine nucleotide binding protein (G p					SLC7A7	4.59397e-08	3.10561		LOC201651	1.11086e-08	4.9932		NFKBIA	3.16346e-06	2.52526		Plac1	9.82632e-06	2.31473		Prr16	0.000259065	-2.49049		SERPINA1	7.87432e-10	6.17951
GNG2	guanine nucleotide binding protein (G p					SPHK1	2.27143e-10	3.03547		LOC645638	2.63126e-08	6.09499		NRIP1	9.68654e-10	2.2721		Plcb4	4.86635e-13	5.93905		Ptgs1	1.80646e-08	-3.16438		SERPINB2	3.52683e-08	11.3616
GPNMB	glycoprotein (transmembrane) nmb					SSX1	9.01951e-12	8.4694		LOC654433	1.49081e-05	2.81688		NXT2	7.24166e-11	3.04856		Plxnd1	2.5535e-09	2.26251		RASSF2	8.0637e-06	-2.54634		SH3TC2	1.15764e-06	2.29192
GPR1	G protein-coupled receptor 1					STAT4	1.63801e-08	3.14227		LUM	0.00621682	2.70553		Ngf	2.19052e-06	-2.29963		Pou2f2	4.57351e-08	2.30914		RHOJ	1.04906e-11	2.74838		SLAMF7	1.22558e-07	-3.70132
GPR56	G protein-coupled receptor 56					STC2	3.65258e-16	33.0326		LY6K	1.24053e-09	2.67664		PAPPAS	4.06781e-07	3.7983		Prr16	0.00106943	-2.20114		RTEL1	2.6388e-12	4.1375		SLC16A2	2.43472e-05	2.47719
Galntl4	UDP-N-acetyl-alpha-D-galactosamine:poly					Sema3e	0.000120406	-2.42028		LYPD3	1.5288e-11	3.6575		PCDH7	6.67693e-06	-2.09142		Ptgs1	3.00023e-07	-2.63022		Robo4	1.26321e-06	2.94466		SLC22A18AS	1.08537e-10	5.22653
Gdf15	growth differentiation factor 15					Serpini1	0.000146628	2.1067		Lamb3	0.000145685	2.28389		PDZK1IP1	0.00115501	3.56167		RASSF2	1.9059e-06	-2.82136		S100P	1.47753e-06	3.44626		SLC2A10	4.74874e-05	-2.01778
Gramd2	GRAM domain containing 2					Six2	5.42946e-09	2.53595		Lcn2	1.22893e-09	14.437		PF4	3.05165e-05	2.01653		RTEL1	5.21996e-13	4.68648		S100Z	3.83683e-07	2.94983		SLC4A4	3.48477e-08	-2.14363
HDAC4	histone deacetylase 4					Slc14a1	4.47533e-09	6.37475		MAMDC2	0.00111733	2.2831		PGM2L1	6.54746e-11	2.05801		Robo4	8.19113e-06	2.57228		SAA4	5.83842e-07	6.36782		SLC7A7	7.6538e-07	2.57616
HIST1H2AL	histone cluster 1, H2ag					Sox15	1.92538e-18	6.18256		MANSC1	1.65802e-05	2.32534		PI3	9.13041e-10	23.0839		S100P	2.78871e-07	3.98734		SELENBP1	4.19686e-06	-2.93624		SLCO4A1	1.88564e-12	9.64964
HIST1H2BD	histone cluster 1, H2bd					Sox4	6.12269e-05	-2.12351		MED24	1.72278e-09	2.00519		PLA2G4C	5.73779e-08	4.84198		S100Z	7.02377e-08	3.33804		SERPINA1	1.00996e-07	3.92352		SP140	0.00307832	2.00754
HIST1H2BG	histone cluster 1, H2be					Sult1c2	2.51806e-10	-2.26822		MFAP2	4.31655e-06	3.1988		PMEPA1	1.00692e-05	2.04093		SAA4	7.6426e-07	6.16086		SERPINB2	7.18621e-08	10.2381		SPHK1	4.2564e-09	2.56268
HIST1H2BG	histone cluster 1, H2bf					Sun3	4.25139e-07	2.99068		MLLT11	5.57346e-12	4.35741		POLM	1.36608e-07	2.12287		SELENBP1	9.23359e-07	-3.31165		SH3TC2	1.00514e-06	2.31038		SSX1	2.33372e-12	9.91212
HIST2H2BE	histone cluster 2, H2be					Syt11	7.69783e-06	3.15959		MMP3	1.42882e-08	9.37436		POPDC3	1.79482e-07	2.19403		SERPINA1	1.2231e-06	3.19367		SIGIRR	1.61978e-07	2.1392		STC2	1.58215e-14	18.1335
HLA-B	major histocompatibility complex, class					TCN1	4.45514e-05	2.49358		MUC1	2.56321e-08	3.3118		PTGES	1.0042e-09	2.40835		SERPINB2	4.49264e-08	10.9632		SLAMF7	4.58242e-08	-4.02004		STEAP1	0.000311967	2.35435
HLA-DRA	major histocompatibility complex, class					TFPI2	1.20244e-07	2.50727		NFKBIA	7.97751e-08	3.26337		PTGS2	4.03671e-05	4.67688		SGSH	2.32494e-07	-2.00462		SLC22A18AS	5.88931e-11	5.52653		Sel1l3	7.20846e-06	-2.34156
HNF1B	HNF1 homeobox B					TMEM139	9.40127e-08	3.92902		NFKBIZ	5.78879e-05	2.27956		Pde2a	8.70197e-06	2.09027		SH3TC2	1.89312e-06	2.22932		SLC7A7	7.55119e-09	3.5354		Sema3e	3.74983e-08	-4.84218
HOXB6	homeobox B6					TMEM154	3.36315e-06	-2.15525		NMB	7.62909e-07	2.08402		Plac1	1.3562e-07	3.08463		SIGIRR	2.19709e-07	2.10801		SLCO4A1	5.27169e-13	11.2651		Slc14a1	6.12106e-10	7.96143
HPSE	heparanase					TMEM88	3.92299e-12	9.08555		NRIP1	1.34662e-08	2.02343		Plcb4	6.97729e-13	5.74733		SLAMF7	5.50765e-07	-3.27872		SP140	0.000672265	2.29495		Slpi	1.04666e-09	7.128
HSD11B1	hydroxysteroid (11-beta) dehydrogenase					TNC	1.65262e-05	-3.1137		NXT2	4.11994e-10	2.75447		Plxnd1	1.48054e-10	2.60552		SLC22A18AS	2.40249e-10	4.87079		SPHK1	1.74033e-09	2.69312		Sox15	2.48723e-14	3.1278
HTRA1	HtrA serine peptidase 1					TNFRSF1B	0.000531471	2.51838		OASL	0.000627108	2.40118		Pou2f2	1.57163e-10	3.19233		SLC7A7	7.50128e-09	3.53713		SPP1	0.000253893	3.92314		Sult1c2	2.85179e-11	-2.51411
Hecw2	HECT, C2 and WW domain containing E3 ub					TNS4	1.48952e-06	2.49185		Oas3	1.70588e-05	2.04166		Prr16	0.000526346	-2.34149		SLCO4A1	1.84725e-12	9.67312		SSX1	1.66318e-12	10.3255		TCEA3	0.000721347	-2.0351
Hist1h1c	histone cluster 1, H1c					TPD52L1	1.13525e-07	2.39693		PDZK1IP1	0.00033328	4.24654		Prr5l	2.46267e-08	2.56539		SP140	0.000457515	2.37326		STC2	4.44626e-15	21.9428		TCN1	2.96317e-07	3.72284
Hist1h2bh	histone cluster 1, H2bh					TRIB3	2.45982e-08	-2.16647		PF4	3.93836e-07	2.61228		Ptgs1	1.13953e-07	-2.7978		SPHK1	4.91992e-10	2.89739		STEAP1	0.000440217	2.28791		TFPI2	4.94274e-11	4.22837
Hspa2	heat shock 70kDa protein 2					TSPYL5	1.45212e-15	5.98485		PGM2L1	9.50837e-11	2.02844		RASSF2	1.97095e-05	-2.39346		SPP1	8.51287e-05	4.52507		Sel1l3	5.95449e-05	-2.05424		TMEM27	1.14166e-08	-4.33073
ICAM1	intercellular adhesion molecule 1					Tspan2	3.87977e-09	2.84607		PI3	1.37459e-08	14.6367		RCN3	2.09257e-08	2.0766		SSX1	2.30519e-13	13.2683		Sema3e	6.03122e-07	-3.75032		TNC	0.00126447	2.14109
ID2	inhibitor of DNA binding 2, dominant ne					ULBP2	1.43711e-07	2.1688		PLA2G4C	4.80757e-10	8.04944		RSAD2	4.22722e-05	4.30813		STC2	1.93696e-15	25.0111		Slc14a1	2.63994e-10	8.79233		TNFAIP3	0.00218187	2.41646
IFFO1	intermediate filament family orphan 1					VCAN	2.00327e-05	4.45161		PLCG2	3.11757e-08	2.53359		RTEL1	3.22647e-13	4.87148		STEAP1	0.00105773	2.12687		Slpi	1.14589e-10	9.21118		TRIML2	2.9351e-05	2.2332
IFI44	interferon-induced protein 44					VEGFA	2.34487e-06	-2.01241		PLEKHO2	3.41356e-10	2.20545		Robo4	3.83664e-06	2.7153		Sema3e	5.38781e-06	-3.11015		Sox15	1.62839e-15	3.69643		TSPYL5	2.88365e-11	2.93385
IFIH1	interferon induced with helicase C doma					VSTM1	7.18203e-07	5.90362		POLM	4.80313e-09	2.51398		S100P	1.0708e-10	8.98366		Slc14a1	2.80687e-10	8.72793		Spink4	2.72693e-05	-3.42264		Tmem171	1.32197e-05	3.11264
IFIT1	interferon-induced protein with tetratr					Vnn1	0.00605507	2.0951		PSG4	4.26183e-06	2.77985		S100Z	4.21682e-07	2.93018		Slpi	8.44545e-11	9.56024		TCN1	4.32161e-09	5.48559		Tnip1	4.50051e-06	2.15847
IGFBP6	insulin-like growth factor binding prot					ZNF404	1.24666e-05	2.09972		PSG5	7.63057e-05	2.20802		SAA4	2.97771e-08	9.35104		Sox15	7.47242e-16	3.89232		TFPI2	2.15334e-11	4.5158		Tspan8	4.7072e-09	-6.57638
IL12RB1	interleukin 12 receptor, beta 1					ZNF670	1.26503e-07	2.6736		PSG9	6.7663e-09	2.84694		SELENBP1	5.06906e-06	-2.89344		Spink4	2.09768e-05	-3.51272		TMEM27	7.33981e-08	-3.70363		VCAN	0.00155907	2.69665
IL1B	interleukin 1, beta					aif1l	1.47135e-08	2.22609		PTGES	5.17594e-08	2.00809		SERPINB2	1.46844e-07	9.24471		Sult1c2	1.6836e-10	-2.3102		TNC	0.000708249	2.25034		VIPR1	5.18936e-07	3.00796
IL23A	interleukin 23, alpha subunit p19					ank2	1.29088e-06	-2.7893		PTGS2	0.000132806	4.0245		SIGIRR	1.06857e-10	3.20835		TCN1	2.87177e-09	5.71329		TNNT1	2.17184e-05	-2.1988		Vnn1	5.36305e-08	7.32186
IL32	interleukin 32					as3mt	3.15104e-06	-2.05444		PTN	2.73869e-06	-2.09889		SLAMF7	8.13792e-07	-3.1799		TFPI2	1.27252e-11	4.71342		TNS4	2.1062e-05	2.11968		ZC3H12C	4.97789e-08	2.33805
IL6	interleukin 6 (interferon, beta 2)					ccbe1	9.51614e-10	-2.34346		Pdzd2	9.97116e-06	2.48868		SLC12A8	9.63638e-07	2.00433		TMEM27	6.87651e-07	-3.10674		TRIB2	7.63382e-07	2.09515		ZG16B	5.99675e-06	2.66529
IL8	interleukin 8					crip1	1.39164e-12	6.98683		Pear1	0.000450323	2.37017		SLC16A2	0.000242371	2.10314		TNC	0.000441386	2.34331		TSPYL5	1.69658e-12	3.49012		ZNF114	2.88243e-07	-2.20345
INHBA	inhibin, beta A					cyb5r2	0.000123192	2.89828		Plac1	1.4809e-07	3.06536		SLC22A18AS	3.03604e-10	4.77274		TNFRSF1B	0.00309451	2.12908		Tmem171	2.25055e-05	2.97209		afap1l1	1.37697e-07	2.21913
INSIG1	insulin induced gene 1					ddit4	6.07564e-10	-2.12986		Plcb4	7.00218e-15	9.11374		SLC7A7	7.10287e-11	5.16419		TNFSF9	3.0075e-07	-2.11571		Tspan8	1.13485e-08	-5.98171		arrb2	2.55159e-08	-2.05117
IQCD	IQ motif containing D					ebi3	6.2792e-07	2.20255		Plxnd1	7.55416e-09	2.15256		SLCO4A1	1.8126e-11	7.47925		TNNT1	5.29067e-06	-2.40424		VCAN	0.000142407	3.54623		as3mt	1.674e-07	-2.40394
IRAK2	interleukin-1 receptor-associated kinas					fabp3	6.70988e-09	3.20245		Pou2f2	2.38568e-10	3.10939		SNN	2.24966e-08	2.13772		TNS4	3.12353e-06	2.37926		VIPR1	1.0327e-07	3.39404		cebpd	3.83449e-05	2.30717
IRF7	interferon regulatory factor 7					fermt3	1.48895e-11	4.18223		RBMS3	0.00040234	-2.0003		SP140	0.000549619	2.33562		TRIB3	5.44376e-08	-2.08868		Vnn1	4.94743e-08	7.39478		clic3	0.000160617	-2.56444
ISG20	interferon stimulated exonuclease gene					fhl1	1.36134e-09	3.82645		RCN3	2.06139e-08	2.07797		SPHK1	2.4227e-10	3.02353		TSPYL5	4.65355e-14	4.49666		ZC3H12C	2.05443e-08	2.4504		ebi3	6.10213e-08	2.50164
ITGA10	integrin, alpha 10					gmfg	2.40723e-08	3.35323		RSAD2	7.57387e-06	5.31835		SPP1	4.78328e-05	4.88193		Tmem171	1.59366e-05	3.06236		ZG16B	8.97541e-07	3.06709		fam65c	2.31475e-09	3.83291
ITGBL1	integrin, beta-like 1 (with EGF-like re					hoxb5	1.54321e-13	9.89482		RTEL1	2.51971e-11	3.52688		SSX1	1.26136e-13	14.387		Tspan8	1.1948e-07	-4.70796		adhfe1	4.44122e-06	2.1442		fermt3	6.37212e-12	4.46654
Id3	inhibitor of DNA binding 3, dominant ne					id1	1.72711e-09	4.14498		Ribc2	3.38507e-06	-2.1766		STC2	5.94751e-16	30.3866		VCAN	2.47233e-05	4.34299		afap1l1	2.8787e-07	2.13894		fhl1	1.99029e-07	2.70503
Ier5l	immediate early response 5-like					il2rg	3.91876e-09	5.76878		Robo4	2.79051e-07	3.30121		STEAP1	0.000677148	2.20742		VIPR1	1.11353e-07	3.37449		arrb2	1.02445e-08	-2.13544		gfpt2	1.38399e-13	3.27715
Ifit2	interferon-induced protein with tetratr					isyna1	6.63131e-10	3.24992		S100P	2.75816e-12	14.4161		Sema3e	2.73188e-06	-3.2923		Vnn1	6.89342e-08	7.10074		as3mt	1.26359e-08	-2.79543		gjb2	4.0724e-05	2.12945
Ifitm1	interferon induced transmembrane protei					lat	1.26018e-06	2.36468		S100Z	1.66265e-07	3.1324		Slc14a1	1.22041e-09	7.35645		ZC3H12C	1.60864e-08	2.48304		clic3	0.000716775	-2.25506		gmfg	3.93414e-13	9.17045
Il1a	interleukin 1, alpha					lpin1	1.95746e-09	-2.67839		S100a3	4.9702e-08	2.3408		Slc6a14	0.00184197	3.30685		ZG16B	2.30309e-06	2.85824		ebi3	9.45878e-07	2.15579		hcp5	9.03126e-05	2.36658
Impa2	inositol(myo)-1(or 4)-monophosphatase 2					mael	3.52902e-12	11.345		SAA4	1.83003e-08	9.99484		Slpi	3.5886e-13	20.3022		afap1l1	2.22419e-07	2.16645		fam65c	8.42555e-11	5.0329		hla-dpa1	1.08719e-05	2.82611
Inhbb	inhibin, beta B					mettl7a	0.00249476	-2.25312		SAMD9	2.75375e-05	2.49601		Sod2	0.000378831	2.66859		arrb2	1.59619e-09	-2.32795		fermt3	5.6024e-12	4.51227		hla-drb1	2.77954e-07	3.7459
Iqcg	IQ motif containing G					mx1	0.000205451	2.47754		SAMD9L	0.00181902	2.13161		Sox15	2.18025e-16	4.23976		as3mt	8.3383e-09	-2.86784		fhl1	7.77337e-08	2.87483		hoxb5	1.12707e-12	7.91737
Irx5	iroquois homeobox 5					nppb	1.09987e-11	5.06266		SBSN	6.1188e-08	4.18273		Spink4	6.14014e-05	-3.16045		clic3	0.00243978	-2.02826		gfpt2	1.58468e-13	3.25045		klf2	4.71514e-06	2.0139
JUP	junction plakoglobin					nupr1	3.18826e-05	-2.49671		SCN3A	7.63881e-07	3.34348		Spint1	4.14796e-05	2.49729		fam65c	3.21401e-10	4.48885		gjb2	4.69963e-05	2.11054		lat	8.59192e-07	2.41903
KIAA1199	KIAA1199					pan2	0.000137082	-2.12111		SCN9A	5.87273e-11	-3.07748		St6galnac2	0.000267086	2.27121		fermt3	3.79131e-11	3.90042		gmfg	3.50282e-13	9.29296		lbh	9.92296e-06	-2.4508
KIAA1462	KIAA1462					pcsk9	3.45799e-09	-3.51773		SELM	5.4276e-06	2.05177		Sun3	3.20545e-05	2.22781		fhl1	5.44644e-08	2.94328		hcp5	8.05679e-05	2.387		mael	6.45499e-05	2.35349
KISS1	KiSS-1 metastasis-suppressor					scd	3.13962e-10	-4.42828		SERPINB2	3.36534e-07	8.23586		TCN1	1.25993e-10	7.97399		gfpt2	2.75962e-13	3.14491		hla-dpa1	7.53514e-06	2.90947		mettl7a	0.000209961	-2.88112
KRT17	keratin 17					socs2	0.000252233	-2.68919		SIGIRR	7.17989e-12	3.84696		TFPI2	8.71849e-13	5.955		gjb2	3.9933e-05	2.13205		hla-drb1	2.56272e-07	3.77206		nnmt	1.10721e-06	-2.16856
KRT86	keratin 86					stom	1.56857e-10	3.07156		SLC12A8	7.2537e-07	2.03147		THBD	0.00120579	2.04983		gmfg	1.72816e-12	7.78832		hoxb5	1.33552e-13	10.0643		nupr1	0.000382508	-2.08164
Kynu	kynureninase (L-kynurenine hydrolase)					sytl3	9.75378e-11	4.62647		SLC22A18AS	3.79645e-08	3.26031		TNC	0.000342565	2.39467		hcp5	3.23608e-05	2.55778		igf2bp3	3.34302e-09	2.16266		pcsk9	2.72786e-09	-3.57914
LAMC2	laminin, gamma 2					thbs2	2.49503e-08	5.82674		SLC7A7	3.01912e-11	5.58031		TNFAIP3	0.00622477	2.1565		hla-dpa1	1.63534e-05	2.73679		klf2	2.19841e-06	2.0945		phyhd1	4.75278e-07	-2.46859
LAMP3	lysosomal-associated membrane protein 3					tnnc1	3.1593e-08	6.31936		SLCO4A1	5.62508e-08	3.57724		TNFRSF1B	0.000233623	2.72197		hla-drb1	4.67106e-07	3.58437		lat	4.40733e-07	2.51828		plekha7	1.55698e-08	-2.1758
LAPTM5	lysosomal multispanning membrane protei					tpm2	3.11725e-17	4.13731		SP140	5.47793e-05	2.85781		TNFSF15	7.26348e-07	3.65932		hoxb5	5.56889e-14	11.1797		lbh	0.000167604	-2.03237		rab31	1.19319e-07	2.18973
LIMD2	LIM domain containing 2									SPHK1	1.09465e-11	3.69838		TNS4	5.14827e-07	2.66714		igf2bp3	4.49016e-10	2.37321		mael	1.11298e-06	3.20024		scd	2.17911e-06	-2.37718
LOC100128288	hypothetical protein LOC100128288									SPTLC3	2.52744e-06	-2.13416		TPD52L1	1.15481e-08	2.73195		klf2	3.30137e-06	2.05097		mettl7a	0.00421894	-2.13642		socs2	0.000202642	-2.74523
LOC100133632	family with sequence similarity 101, me									SSX1	7.34937e-13	11.4231		TRPM4	8.59527e-08	2.24869		lat	2.24651e-07	2.62476		nupr1	0.000130914	-2.25046		sytl3	2.57288e-11	5.18629
LOC201651	similar to arylacetamide deacetylase (A									STAT4	1.45961e-10	4.47453		TSPYL5	5.29339e-15	5.35119		lbh	0.000113037	-2.08524		pcsk9	1.32945e-07	-2.74412		tgfbi	1.33882e-12	3.46685
LOC440459	solute carrier family 16, member 6 (mon									STC2	2.49887e-16	35.2972		Tmem171	2.87297e-06	3.56414		mael	2.77141e-08	4.36426		phyhd1	3.60268e-07	-2.50991		thbs2	3.90929e-11	12.6907
LOC645638	similar to WDNM1-like protein									Sdc4	4.79854e-11	2.03053		Tspan8	1.06031e-07	-4.76333		mettl7a	0.00113313	-2.43807		rab31	2.35539e-08	2.37786		tmcc3	9.45102e-05	2.00982
LOC654433	hypothetical LOC654433									Sema3e	0.00019582	-2.32928		VCAN	3.9308e-06	5.40877		nupr1	2.72581e-06	-3.00993		socs2	0.000202663	-2.7452		tpm2	9.95277e-14	2.58423
LUM	lumican									Serpini1	4.64646e-05	2.278		Vnn1	1.28724e-09	11.945		pcsk9	5.01122e-12	-6.0496		sytl3	3.1855e-11	5.09003
LY6K	lymphocyte antigen 6 complex, locus K									Six2	3.43331e-08	2.30207		ZBTB1	3.0743e-06	2.33517		phyhd1	1.06746e-07	-2.70432		tgfbi	1.03274e-12	3.5258
LYPD3	LY6/PLAUR domain containing 3									Slc14a1	8.58166e-09	5.94868		ZC3H12C	5.43562e-09	2.6369		rab31	1.07695e-07	2.20087		thbs2	5.15354e-11	12.2229
Lamb3	laminin, beta 3									Slfn5	0.000135852	2.08251		ZG16B	4.89134e-08	3.86272		scd	1.83702e-08	-3.24742		tmcc3	3.91141e-05	2.12186
Lcn2	lipocalin 2									Slpi	2.44765e-10	8.41389		aass	0.000291729	-2.01082		socs2	0.000497282	-2.52277		tpm2	3.50353e-14	2.72131
Lrrc61	leucine rich repeat containing 61									Sod2	2.67123e-05	3.46041		adhfe1	6.54118e-06	2.09894		sytl3	7.40804e-12	5.80451
Ltbp1	latent transforming growth factor beta									Sox15	9.87833e-18	5.37567		afap1l1	3.29714e-07	2.1247		tgfbi	1.22138e-12	3.48751
MAL2	mal, T-cell differentiation protein 2									Spint1	2.54763e-05	2.59133		as3mt	9.04037e-10	-3.31076		thbs2	1.21088e-10	10.9122
MAMDC2	MAM domain containing 2									Sun3	5.262e-07	2.94522		cebpd	3.3664e-05	2.3279		tmcc3	2.88659e-05	2.16221
MANSC1	MANSC domain containing 1									TCN1	1.40778e-09	6.14271		cldn7	1.52263e-08	2.87328		tpm2	1.59984e-14	2.83354
MED24	mediator complex subunit 24									TFPI2	1.08782e-11	4.77487		cyb5r2	0.000112489	2.92348
MERTK	c-mer proto-oncogene tyrosine kinase									THBD	0.000893018	2.10003		ebi3	5.18031e-08	2.52505
MFAP2	microfibrillar-associated protein 2									TMEM88	5.889e-10	5.38346		fam65c	3.05811e-10	4.50747
MFGE8	milk fat globule-EGF factor 8 protein									TMPO	0.000778493	-2.85804		fermt3	1.36636e-11	4.20972
MLLT11	myeloid/lymphoid or mixed-lineage leuke									TNFAIP3	2.49788e-05	3.88934		fggy	3.81651e-06	2.45335
MMP3	matrix metallopeptidase 3 (stromelysin									TNFRSF1B	1.39806e-06	4.49718		fhl1	3.23284e-08	3.0482
MT1G	metallothionein 1G									TNS4	3.0433e-07	2.76057		gbp5	0.000239809	2.83421
MTMR11	myotubularin related protein 11									TPD52L1	2.90199e-07	2.27798		gfpt2	8.10094e-13	2.95635
MUC1	mucin 1, cell surface associated									TRIB3	7.96855e-08	-2.05309		gmfg	1.25954e-11	6.3543
Matn2	matrilin 2									TRIML2	9.72654e-05	2.0677		hcp5	3.05742e-05	2.56888
Mxra8	matrix-remodelling associated 8									TRPM4	1.69341e-07	2.17365		hla-drb1	2.8166e-05	2.58339
NANOS1	nanos homolog 1 (Drosophila)									TSPAN1	2.77547e-05	2.0727		hoxb5	7.50947e-14	10.7802
NFKBIA	nuclear factor of kappa light polypepti									TSPYL5	3.125e-16	6.89631		igf2bp3	6.17566e-09	2.10503
NFKBIZ	nuclear factor of kappa light polypepti									Tmem171	5.89382e-06	3.34201		lat	4.95968e-08	2.8896
NMB	neuromedin B									Tnip1	1.13062e-06	2.3348		mael	7.65723e-10	6.14466
NRIP1	nuclear receptor interacting protein 1									Tspan8	0.00162148	-2.04781		mettl7a	0.00201289	-2.30221
NTNG2	netrin G2									VCAN	2.79271e-05	4.28147		pcsk9	5.38708e-12	-6.00839
NXT2	nuclear transport factor 2-like export									VSTM1	8.84067e-05	3.43636		phyhd1	1.69692e-07	-2.62763
Nedd9	neural precursor cell expressed, develo									Vnn1	2.39444e-08	8.09441		rab31	2.02801e-09	2.71871
Ngf	nerve growth factor (beta polypeptide)									ZBTB1	6.50806e-06	2.23254		scd	2.50316e-07	-2.72233
Nrk	Nik related kinase									ZC3H12C	2.74125e-09	2.7423		socs2	4.5405e-05	-3.16371
OASL	2'-5'-oligoadenylate synthetase-like									ZG16B	1.31542e-06	2.97995		st3gal5	1.27203e-05	2.00711
Oas3	2'-5'-oligoadenylate synthetase 3, 100k									ZNF404	1.51924e-07	2.73604		stom	2.93923e-08	2.29583
PAPPAS	pregnancy-associated plasma protein A,									ZNF670	9.51754e-07	2.36764		sytl3	9.05042e-12	5.69803
PBX1	pre-B-cell leukemia homeobox 1									adhfe1	2.11034e-07	2.55597		tgfbi	3.08941e-13	3.82305
PCDH7	protocadherin 7									afap1l1	3.5257e-07	2.11772		thbs2	7.55296e-11	11.6123
PDZK1IP1	PDZK1 interacting protein 1									aif1l	1.29128e-07	2.01467		tmcc3	8.97117e-05	2.01624
PF4	platelet factor 4									as3mt	5.59835e-08	-2.55857		tpm2	2.23599e-15	3.1566
PGM2L1	phosphoglucomutase 2-like 1									bdh2	8.5425e-05	-2.11763
PI3	peptidase inhibitor 3, skin-derived									bmp2	3.34154e-08	2.51285
PION	pigeon homolog (Drosophila)									cldn7	5.98223e-08	2.64147
PLA2G4C	phospholipase A2, group IVC (cytosolic,									crip1	3.18398e-11	5.19685
PLCG2	phospholipase C, gamma 2 (phosphatidyli									cyb5r2	9.54748e-06	3.71296
PLEKHO2	pleckstrin homology domain containing,									ebi3	3.47477e-11	4.07569
PLXDC2	plexin domain containing 2									fabp3	2.49853e-08	2.93414
PMEPA1	prostate transmembrane protein, androge									fam65c	1.74542e-08	3.29962
POLM	polymerase (DNA directed), mu									fermt3	3.92716e-12	4.64225
POPDC3	popeye domain containing 3									fggy	1.86649e-06	2.57052
PSG4	pregnancy specific beta-1-glycoprotein									fhl1	2.53382e-07	2.66385
PSG5	pregnancy specific beta-1-glycoprotein									gbp5	1.33924e-05	3.78375
PSG9	pregnancy specific beta-1-glycoprotein									gfpt2	1.03143e-09	2.09184
PTGES	prostaglandin E synthase									gmfg	1.10198e-09	4.25552
PTGS2	prostaglandin-endoperoxide synthase 2 (									hcp5	2.46799e-05	2.61129
PTN	pleiotrophin									herc6	1.13295e-05	2.11592
Pabpc4l	poly(A) binding protein, cytoplasmic 4-									hoxb5	1.99643e-13	9.60256
Pak6	p21 protein (Cdc42/Rac)-activated kinas									id1	4.43739e-06	2.37621
Pde2a	phosphodiesterase 2A, cGMP-stimulated									ifi30	7.54625e-06	2.07998
Pdzd2	PDZ domain containing 2									il2rg	2.93704e-10	7.60564
Pear1	platelet endothelial aggregation recept									isyna1	4.88733e-08	2.50069
Plac1	placenta-specific 1									klhl21	6.75683e-07	2.07791
Plcb4	phospholipase C, beta 4									lat	4.48533e-08	2.90865
Plxna2	plexin A2									mael	1.37428e-11	9.58923
Plxnd1	plexin D1									mettl7a	0.000347172	-2.74121
Pou2f2	POU class 2 homeobox 2									mx1	1.67407e-05	3.07286
Prr16	proline rich 16									nppb	3.07529e-13	7.05909
Prr5l	proline rich 5 like									pcsk9	2.74694e-10	-4.26774
Ptgs1	prostaglandin-endoperoxide synthase 1 (									phyhd1	2.87127e-07	-2.54454
RASSF2	Ras association (RalGDS/AF-6) domain fa									pstpip2	3.48839e-07	2.22639
RBMS3	RNA binding motif, single stranded inte									scd	6.32801e-08	-2.98147
RBP7	retinol binding protein 7, cellular									socs2	3.03709e-05	-3.28817
RCN3	reticulocalbin 3, EF-hand calcium bindi									stom	3.66587e-10	2.91791
RGS9	regulator of G-protein signaling 9									sytl3	3.2592e-12	6.27281
RHOJ	ras homolog gene family, member J									tgfbi	8.244e-10	2.4106
RSAD2	radical S-adenosyl methionine domain co									thbs2	1.30734e-09	8.11558
RTEL1	tumor necrosis factor receptor superfam									tnnc1	1.04881e-06	4.36237
Rcsd1	RCSD domain containing 1									tpm2	5.37206e-17	3.98512
Ribc2	RIB43A domain with coiled-coils 2
Robo4	roundabout homolog 4, magic roundabout
S100P	S100 calcium binding protein P
S100Z	S100 calcium binding protein Z
S100a3	S100 calcium binding protein A3
SAA4	serum amyloid A4, constitutive
SAMD9	sterile alpha motif domain containing 9
SAMD9L	sterile alpha motif domain containing 9
SBSN	suprabasin
SCN3A	sodium channel, voltage-gated, type III
SCN9A	sodium channel, voltage-gated, type IX,
SDK1	sidekick homolog 1, cell adhesion molec
SELENBP1	selenium binding protein 1
SELM	selenoprotein M
SERPINA1	serpin peptidase inhibitor, clade A (al
SERPINB2	serpin peptidase inhibitor, clade B (ov
SGSH	N-sulfoglucosamine sulfohydrolase
SH3TC2	SH3 domain and tetratricopeptide repeat
SIGIRR	single immunoglobulin and toll-interleu
SLAMF7	SLAM family member 7
SLC12A8	solute carrier family 12 (potassium/chl
SLC16A2	solute carrier family 16, member 2 (mon
SLC1A3	solute carrier family 1 (glial high aff
SLC22A18AS	solute carrier family 22 (organic catio
SLC22A3	solute carrier family 22 (extraneuronal
SLC2A10	solute carrier family 2 (facilitated gl
SLC4A4	solute carrier family 4, sodium bicarbo
SLC6A8	solute carrier family 6 (neurotransmitt
SLC7A7	solute carrier family 7 (cationic amino
SLCO4A1	solute carrier organic anion transporte
SNN	stannin
SP140	SP140 nuclear body protein
SPHK1	sphingosine kinase 1
SPP1	secreted phosphoprotein 1
SPTLC3	serine palmitoyltransferase, long chain
SSX1	synovial sarcoma, X breakpoint 1
STAT4	signal transducer and activator of tran
STC2	stanniocalcin 2
STEAP1	six transmembrane epithelial antigen of
Sdc4	syndecan 4
Sel1l3	KIAA0746 protein
Sema3e	sema domain, immunoglobulin domain (Ig)
Serpini1	serpin peptidase inhibitor, clade I (ne
Six2	SIX homeobox 2
Slc14a1	solute carrier family 14 (urea transpor
Slc6a14	solute carrier family 6 (amino acid tra
Slfn5	schlafen family member 5
Slpi	secretory leukocyte peptidase inhibitor
Sod2	superoxide dismutase 2, mitochondrial
Sox15	SRY (sex determining region Y)-box 15
Sox4	SRY (sex determining region Y)-box 4
Spink4	serine peptidase inhibitor, Kazal type
Spint1	serine peptidase inhibitor, Kunitz type
St6galnac2	ST6 (alpha-N-acetyl-neuraminyl-2,3-beta
Sult1c2	sulfotransferase family, cytosolic, 1C,
Sun3	Sad1 and UNC84 domain containing 1
Syt11	synaptotagmin XI
TCEA3	transcription elongation factor A (SII)
TCN1	transcobalamin I (vitamin B12 binding p
TFPI2	tissue factor pathway inhibitor 2
THBD	thrombomodulin
TMEM139	transmembrane protein 139
TMEM154	transmembrane protein 154
TMEM27	transmembrane protein 27
TMEM88	transmembrane protein 88
TMPO	thymopoietin
TNC	tenascin C
TNFAIP3	tumor necrosis factor, alpha-induced pr
TNFRSF1B	tumor necrosis factor receptor superfam
TNFSF15	tumor necrosis factor (ligand) superfam
TNFSF9	tumor necrosis factor (ligand) superfam
TNNT1	troponin T type 1 (skeletal, slow)
TNS4	tensin 4
TPD52L1	tumor protein D52-like 1
TRIB2	tribbles homolog 2 (Drosophila)
TRIB3	tribbles homolog 3 (Drosophila)
TRIML2	tripartite motif family-like 2
TRPM4	transient receptor potential cation cha
TSPAN1	tetraspanin 1
TSPYL5	TSPY-like 5
Tmem171	transmembrane protein 171
Tnip1	TNFAIP3 interacting protein 1
Tspan2	tetraspanin 2
Tspan8	tetraspanin 8
ULBP2	UL16 binding protein 2
VCAN	versican
VEGFA	vascular endothelial growth factor A
VIPR1	vasoactive intestinal peptide receptor
VSTM1	V-set and transmembrane domain containi
Vnn1	vanin 1
ZBTB1	zinc finger and BTB domain containing 1
ZC3H12C	zinc finger CCCH-type containing 12C
ZG16B	zymogen granule protein 16 homolog B (r
ZNF114	zinc finger protein 114
ZNF404	zinc finger protein 404
ZNF670	zinc finger protein 670
aass	aminoadipate-semialdehyde synthase
adhfe1	alcohol dehydrogenase, iron containing,
afap1l1	actin filament associated protein 1-lik
aif1l	allograft inflammatory factor 1-like
ank2	ankyrin 2, neuronal
arrb2	arrestin, beta 2
as3mt	arsenic (+3 oxidation state) methyltran
bdh2	3-hydroxybutyrate dehydrogenase, type 2
bmp2	bone morphogenetic protein 2
ccbe1	collagen and calcium binding EGF domain
cebpd	CCAAT/enhancer binding protein (C/EBP),
cldn7	claudin 7
clic3	chloride intracellular channel 3
crip1	cysteine-rich protein 1 (intestinal)
cyb5r2	cytochrome b5 reductase 2
ddit4	DNA-damage-inducible transcript 4
ebi3	Epstein-Barr virus induced 3
fabp3	fatty acid binding protein 3, muscle an
fam65c	family with sequence similarity 65, mem
fermt3	fermitin family homolog 3 (Drosophila)
fggy	FGGY carbohydrate kinase domain contain
fhl1	four and a half LIM domains 1
gbp5	guanylate binding protein 5
gfpt2	glutamine-fructose-6-phosphate transami
gjb2	gap junction protein, beta 2, 26kDa
gmfg	glia maturation factor, gamma
hcp5	HLA complex P5
herc6	hect domain and RLD 6
hla-dpa1	major histocompatibility complex, class
hla-drb1	major histocompatibility complex, class
hoxb5	homeobox B5
id1	inhibitor of DNA binding 1, dominant ne
ifi30	interferon, gamma-inducible protein 30
igf2bp3	insulin-like growth factor 2 mRNA bindi
il2rg	interleukin 2 receptor, gamma (severe c
isyna1	inositol-3-phosphate synthase 1
klf2	Kruppel-like factor 2 (lung)
klhl21	kelch-like 21 (Drosophila)
lat	linker for activation of T cells
lbh	limb bud and heart development homolog
lpin1	lipin 1
mael	maelstrom homolog (Drosophila)
mettl7a	methyltransferase like 7A
mx1	myxovirus (influenza virus) resistance
nnmt	nicotinamide N-methyltransferase
nppb	natriuretic peptide precursor B
nupr1	nuclear protein, transcriptional regula
pan2	PAN2 poly(A) specific ribonuclease subu
pcsk9	proprotein convertase subtilisin/kexin
phyhd1	phytanoyl-CoA dioxygenase domain contai
plekha7	pleckstrin homology domain containing,
pstpip2	proline-serine-threonine phosphatase in
rab31	RAB31, member RAS oncogene family
scd	stearoyl-CoA desaturase (delta-9-desatu
socs2	suppressor of cytokine signaling 2
st3gal5	ST3 beta-galactoside alpha-2,3-sialyltr
stom	stomatin
sytl3	synaptotagmin-like 3
tgfbi	transforming growth factor, beta-induce
thbs2	thrombospondin 2
tmcc3	transmembrane and coiled-coil domain fa
tnnc1	troponin C type 1 (slow)
tpm2	tropomyosin 2 (beta)

## Sheet: MDA-MB231 MIRs
MDA-MB231 Different Passages (7)			MDA-MB231 Different Passages (7)
Uonion Mirs			Intersection Mirs			MDA Treated vs. MDA Un-treated			MDA P1 vs. MDA Un-treated			MDA P3 vs. MDA Un-treated			MDA P5 vs. MDA Un-treated			MDA P7 vs. MDA Un-treated			MDA P10 vs. MDA Un-treated
Mir ID	Sequence		Mir ID	Sequence		Mir ID	Fold-Change		Mir ID	Fold-Change		Mir ID	Fold-Change		Mir ID	Fold-Change		Mir ID	Fold-Change		Mir ID	Fold-Change
hsa-let-7f-1 // hsa-let-7f-2	UGAGGUAGUAGAUUGUAUAGUU		hsa-mir-99a	AACCCGUAGAUCCGAUCUUGUG		hsa-mir-125a	-4.39759		hsa-let-7i	-2.05654		hsa-mir-1228	2.11744		hsa-let-7f-1 // hsa-let-7f-2	-2.98133		hsa-mir-1231	-2.28651		hsa-mir-106b	-2.22028
hsa-let-7g	UGAGGUAGUAGUUUGUACAGUU					hsa-mir-1280	2.60381		hsa-mir-1207	2.42931		hsa-mir-1246	9.73317		hsa-let-7g	-6.176		hsa-mir-126	-2.02853		hsa-mir-1207	3.17752
hsa-let-7i	UGAGGUAGUAGUUUGUGCUGUU					hsa-mir-210	-2.17327		hsa-mir-1228	2.58145		hsa-mir-146a	5.35993		hsa-mir-106b	-26.7756		hsa-mir-139	2.52937		hsa-mir-1228	5.31534
hsa-mir-106b	UAAAGUGCUGACAGUGCAGAU					hsa-mir-24-2 // hsa-mir-24-1	-2.13889		hsa-mir-1246	11.0616		hsa-mir-193b	3.08076		hsa-mir-107	-3.09062		hsa-mir-146a	2.56044		hsa-mir-126	-2.45326
hsa-mir-107	AGCAGCAUUGUACAGGGCUAUCA					hsa-mir-27b	-2.00322		hsa-mir-125b-1 // hsa-mir-125b-2	-2.22285		hsa-mir-34a	3.72244		hsa-mir-1228	2.31608		hsa-mir-181a-1 // hsa-mir-181a-2	-2.17125		hsa-mir-1268	4.05286
hsa-mir-1207	UGGCAGGGAGGCUGGGAGGGG					hsa-mir-27b	-2.15007		hsa-mir-138-2 // hsa-mir-138-1	-2.07559		hsa-mir-34c	-2.10124		hsa-mir-125a	2.07078		hsa-mir-193b	3.09632		hsa-mir-1307	2.20728
hsa-mir-1228	GUGGGCGGGGGCAGGUGUGUG					hsa-mir-29b-2 // hsa-mir-29b-1	2.98985		hsa-mir-146a	2.05193		hsa-mir-584	2.23515		hsa-mir-1275	3.30026		hsa-mir-21	-2.32597		hsa-mir-1308	3.43798
hsa-mir-1231	GUGUCUGGGCGGACAGCUGC					hsa-mir-342	-2.36358		hsa-mir-149	2.7148		hsa-mir-663	2.34729		hsa-mir-1280	18.8505		hsa-mir-584	2.67082		hsa-mir-130a	-2.29484
hsa-mir-1246	AAUGGAUUUUUGGAGCAGG					hsa-mir-886	-3.09579		hsa-mir-18b	-2.22672		hsa-mir-886	-3.57281		hsa-mir-1307	2.25416		hsa-mir-886	-2.21982		hsa-mir-146a	2.46482
hsa-mir-125a	ACAGGUGAGGUUCUUGGGAGCC					hsa-mir-93	-2.17921		hsa-mir-193b	2.17971		hsa-mir-886	-4.6603		hsa-mir-1308	-2.43804		hsa-mir-886	-2.95942		hsa-mir-149	3.3111
hsa-mir-125b-1 // hsa-mir-125b-2	ACGGGUUAGGCUCUUGGGAGCU					hsa-mir-99a	-2.31254		hsa-mir-210	-2.81866		hsa-mir-99a	-2.31613		hsa-mir-138-2 // hsa-mir-138-1	-2.41351		hsa-mir-99a	-2.04367		hsa-mir-152	-2.08029
hsa-mir-126	UCGUACCGUGAGUAAUAAUGCG					hsa-mir-99b	-2.0169		hsa-mir-27b	-2.17011					hsa-mir-149	2.34089					hsa-mir-15a	-2.66254
hsa-mir-1268	CGGGCGUGGUGGUGGGGG								hsa-mir-324	-2.47038					hsa-mir-15a	-3.42058					hsa-mir-183	-2.64426
hsa-mir-1275	GUGGGGGAGAGGCUGUC								hsa-mir-421	-2.09749					hsa-mir-16-1 // hsa-mir-16-2	-6.79972					hsa-mir-18b	-2.12007
hsa-mir-1280	UCCCACCGCUGCCACCC								hsa-mir-494	4.50483					hsa-mir-1826	-3.95072					hsa-mir-193b	2.77949
hsa-mir-1307	ACUCGGCGUGGCGUCGGUCGUG								hsa-mir-638	2.39454					hsa-mir-193a	3.30527					hsa-mir-194-2 // hsa-mir-194-1	-2.31203
hsa-mir-1308	GCAUGGGUGGUUCAGUGG								hsa-mir-663	3.13846					hsa-mir-193b	2.12436					hsa-mir-21	-3.61795
hsa-mir-130a	CAGUGCAAUGUUAAAAGGGCAU								hsa-mir-720	-2.3733					hsa-mir-21	7.81232					hsa-mir-27b	-3.17548
hsa-mir-138-2 // hsa-mir-138-1	GCUACUUCACAACACCAGGGCC								hsa-mir-886	-2.50696					hsa-mir-23a	-2.78496					hsa-mir-28	-2.12729
hsa-mir-139	UCUACAGUGCACGUGUCUCCAG								hsa-mir-886	-2.68207					hsa-mir-23b	-2.77524					hsa-mir-301a	-4.66076
hsa-mir-146a	UGAGAACUGAAUUCCAUGGGUU								hsa-mir-923	3.04368					hsa-mir-24-2 // hsa-mir-24-1	-2.22675					hsa-mir-30a	-2.21335
hsa-mir-149	AGGGAGGGACGGGGGCUGUGC								hsa-mir-99a	-2.35739					hsa-mir-27a	-3.76194					hsa-mir-421	-2.62867
hsa-mir-152	UCAGUGCAUGACAGAACUUGG														hsa-mir-27b	-3.31111					hsa-mir-584	2.20251
hsa-mir-15a	UAGCAGCACAUAAUGGUUUGUG														hsa-mir-28	-2.56242					hsa-mir-638	5.47806
hsa-mir-16-1 // hsa-mir-16-2	UAGCAGCACGUAAAUAUUGGCG														hsa-mir-30a	-3.05058					hsa-mir-663	3.87153
hsa-mir-181a-1 // hsa-mir-181a-2	ACCACUGACCGUUGACUGUACC														hsa-mir-30c-1 // hsa-mir-30c-2	2.04614					hsa-mir-99a	-4.04478
hsa-mir-1826	AUUGAUCAUCGACACUUCGAACGCAAU														hsa-mir-30c-1 // hsa-mir-30c-2	-8.87407
hsa-mir-183	UAUGGCACUGGUAGAAUUCACU														hsa-mir-320a	2.25584
hsa-mir-18b	UAAGGUGCAUCUAGUGCAGUUAG														hsa-mir-320b-1 // hsa-mir-320b-2	2.28659
hsa-mir-193a	UGGGUCUUUGCGGGCGAGAUGA														hsa-mir-320c-1 // hsa-mir-320c-2	2.23831
hsa-mir-193b	AACUGGCCCUCAAAGUCCCGCU														hsa-mir-378	2.10982
hsa-mir-194-2 // hsa-mir-194-1	UGUAACAGCAACUCCAUGUGGA														hsa-mir-425	-2.71703
hsa-mir-21	CAACACCAGUCGAUGGGCUGU														hsa-mir-432	3.44964
hsa-mir-21	UAGCUUAUCAGACUGAUGUUGA														hsa-mir-455	-3.1511
hsa-mir-210	CUGUGCGUGUGACAGCGGCUGA														hsa-mir-500	2.44162
hsa-mir-23a	AUCACAUUGCCAGGGAUUUCC														hsa-mir-501	2.58999
hsa-mir-23b	AUCACAUUGCCAGGGAUUACC														hsa-mir-551b	3.04081
hsa-mir-24-2 // hsa-mir-24-1	UGCCUACUGAGCUGAAACACAG														hsa-mir-574	2.36133
hsa-mir-24-2 // hsa-mir-24-1	UGGCUCAGUUCAGCAGGAACAG														hsa-mir-574	-3.21675
hsa-mir-27a	UUCACAGUGGCUAAGUUCCGC														hsa-mir-584	5.45295
hsa-mir-27b	UUCACAGUGGCUAAGUUCUGC														hsa-mir-629	2.32752
hsa-mir-27b	AGAGCUUAGCUGAUUGGUGAAC														hsa-mir-652	2.06963
hsa-mir-28	AAGGAGCUCACAGUCUAUUGAG														hsa-mir-671	2.93908
hsa-mir-29b-2 // hsa-mir-29b-1	UAGCACCAUUUGAAAUCAGUGUU														hsa-mir-720	6.22367
hsa-mir-301a	CAGUGCAAUAGUAUUGUCAAAGC														hsa-mir-768	-3.61711
hsa-mir-30a	UGUAAACAUCCUCGACUGGAAG														hsa-mir-877	2.6283
hsa-mir-30a	CUUUCAGUCGGAUGUUUGCAGC														hsa-mir-886	13.1046
hsa-mir-30c-1 // hsa-mir-30c-2	CUGGGAGAAGGCUGUUUACUCU														hsa-mir-923	5.98622
hsa-mir-30c-1 // hsa-mir-30c-2	UGUAAACAUCCUACACUCUCAGC														hsa-mir-99a	-4.90719
hsa-mir-320a	AAAAGCUGGGUUGAGAGGGCGA														hsa-mir-99b	2.79672
hsa-mir-320b-1 // hsa-mir-320b-2	AAAAGCUGGGUUGAGAGGGCAA
hsa-mir-320c-1 // hsa-mir-320c-2	AAAAGCUGGGUUGAGAGGGU
hsa-mir-324	ACUGCCCCAGGUGCUGCUGG
hsa-mir-342	UCUCACACAGAAAUCGCACCCGU
hsa-mir-34a	UGGCAGUGUCUUAGCUGGUUGU
hsa-mir-34c	AGGCAGUGUAGUUAGCUGAUUGC
hsa-mir-378	ACUGGACUUGGAGUCAGAAGG
hsa-mir-421	AUCAACAGACAUUAAUUGGGCGC
hsa-mir-425	AAUGACACGAUCACUCCCGUUGA
hsa-mir-432	UCUUGGAGUAGGUCAUUGGGUGG
hsa-mir-455	GCAGUCCAUGGGCAUAUACAC
hsa-mir-494	UGAAACAUACACGGGAAACCUC
hsa-mir-500	UAAUCCUUGCUACCUGGGUGAGA
hsa-mir-501	AAUCCUUUGUCCCUGGGUGAGA
hsa-mir-551b	GAAAUCAAGCGUGGGUGAGACC
hsa-mir-574	CACGCUCAUGCACACACCCACA
hsa-mir-574	UGAGUGUGUGUGUGUGAGUGUGU
hsa-mir-584	UUAUGGUUUGCCUGGGACUGAG
hsa-mir-629	UGGGUUUACGUUGGGAGAACU
hsa-mir-638	AGGGAUCGCGGGCGGGUGGCGGCCU
hsa-mir-652	AAUGGCGCCACUAGGGUUGUG
hsa-mir-663	AGGCGGGGCGCCGCGGGACCGC
hsa-mir-671	AGGAAGCCCUGGAGGGGCUGGAG
hsa-mir-720	UCUCGCUGGGGCCUCCA
hsa-mir-768	GUUGGAGGAUGAAAGUACGGAGUGAU
hsa-mir-877	GUAGAGGAGAUGGCGCAGGG
hsa-mir-886	CGCGGGUGCUUACUGACCCUU
hsa-mir-886	CGGGUCGGAGUUAGCUCAAGCGG
hsa-mir-923	GUCAGCGGAGGAAAAGAAACU
hsa-mir-93	ACUGCUGAGCUAGCACUUCCCG
hsa-mir-99a	AACCCGUAGAUCCGAUCUUGUG
hsa-mir-99b	CACCCGUAGAACCGACCUUGCG
hsa-mir-99b	CAAGCUCGUGUCUGUGGGUCCG

## Sheet: SKBR3 Genes
SKBR3 Different Passages (7)			SKBR3 Different Passages (7)
Uonion Genes			Intersection Genes			SKBR3 Treated vs. SKBR3 Un-treated				SKBR3 P1 vs. SKBR3 Un-treated				SKBR3 P3 vs. SKBR3 Un-treated				SKBR3 P5 vs. SKBR3 Un-treated				SKBR3 P7 vs. SKBR3 Un-treated				SKBR3 P10 vs. SKBR3 Un-treated
Gene Symbole	Gene Description		Gene Symbole	Gene Description		Gene Symbole	P-Value	Fold-Change		Gene Symbole	P-Value	Fold-Change		Gene Symbole	P-Value	Fold-Change		Gene Symbole	P-Value	Fold-Change		Gene Symbole	P-Value	Fold-Change		Gene Symbole	P-Value	Fold-Change
AASDH	aminoadipate-semialdehyde dehydrogenase		ABCA3	ATP-binding cassette, sub-family A (ABC		ABCA3	2.3419e-08	-2.97216		AASDH	3.99994e-09	-2.40106		ABCA3	3.7279e-07	-2.49871		AASDH	1.27506e-08	-2.26673		ABCA3	2.78778e-10	-4.07781		ABCA3	9.34383e-10	-3.72042
ABCA3	ATP-binding cassette, sub-family A (ABC		ACSF2	acyl-CoA synthetase family member 2		ACSF2	4.53967e-07	-2.41753		ABCA3	2.26885e-09	-3.48778		ABLIM1	2.18707e-10	-2.31005		ABCA3	2.39182e-09	-3.47464		ABLIM1	1.32302e-11	-2.64936		ACSF2	1.47498e-06	-2.25991
ABLIM1	actin binding LIM protein 1		ACSL5	acyl-CoA synthetase long-chain family m		ACSL5	2.86951e-08	3.30333		ABLIM1	2.79991e-11	-2.55007		ABTB2	1.57023e-10	2.46633		ABLIM1	1.3691e-12	-2.99692		ACCN2	1.32325e-07	-2.44504		ACSL5	1.90955e-08	3.40293
ABTB2	ankyrin repeat and BTB (POZ) domain con		AEN	apoptosis enhancing nuclease		ADAMTS5	2.23769e-09	-2.23733		ACAD11	3.57729e-06	-2.13531		ACAD11	1.04604e-06	-2.04737		ACAD11	2.49056e-06	-2.17804		ACSF2	2.63435e-09	-3.35177		ADAMTS5	1.69955e-09	-2.26605
ACAD11	nephronophthisis 3 (adolescent)		ALDH1A3	aldehyde dehydrogenase 1 family, member		ADRB2	1.29239e-05	4.56493		ACADSB	1.02521e-08	-2.20014		ACER3	9.76843e-10	2.34635		ACAD11	7.15625e-07	-2.08583		ACSL5	9.81453e-12	6.49022		AEN	1.21747e-11	3.74407
ACAD11	acyl-Coenzyme A dehydrogenase family, m		AMACR	alpha-methylacyl-CoA racemase		AEN	6.998e-12	3.89398		ACADVL	1.10874e-07	-2.0227		ACLY	5.5769e-15	-2.52799		ACADSB	1.86207e-08	-2.14042		ADAMTS5	2.59911e-10	-2.48141		AHNAK2	3.3871e-08	-2.40588
ACADSB	acyl-Coenzyme A dehydrogenase, short/br		ARHGEF6	Rac/Cdc42 guanine nucleotide exchange f		AFP	2.03233e-07	4.07064		ACCN2	4.16768e-09	-3.00937		ACSF2	8.97532e-09	-3.08407		ACCN2	2.6615e-09	-3.09757		ADRB2	5.62325e-06	5.03421		AKAP12	4.9933e-06	2.9686
ACADVL	acyl-Coenzyme A dehydrogenase, very lon		ASS1	argininosuccinate synthetase 1		AGPAT3	1.94512e-12	-2.46282		ACER3	6.35387e-09	2.15103		ACSL5	1.74616e-13	10.034		ACER3	1.59549e-08	2.06553		AEN	1.61258e-13	5.22326		ALDH1A3	1.27326e-13	5.55088
ACCN2	amiloride-sensitive cation channel 2, n		Acot4	acyl-CoA thioesterase 4		AHNAK2	1.04233e-07	-2.26821		ACOT13	7.66514e-06	-2.0524		ADAMTS6	0.00105472	2.2716		ACSF2	1.1427e-09	-3.55536		AFP	1.27117e-05	2.86461		AMACR	5.88736e-13	-4.67989
ACER3	alkaline ceramidase 3		Adamts1	ADAM metallopeptidase with thrombospond		AKAP12	5.52861e-06	2.94471		ACSF2	8.14051e-10	-3.64351		ADAMTS9	3.60515e-07	-3.09427		ACSL5	1.93871e-13	9.91131		AGXT2L2	4.76032e-06	-2.03264		ARHGEF6	3.74129e-06	-2.50271
ACLY	ATP citrate lyase		Adora2b	adenosine A2b receptor		AKR1B15	0.0136806	-2.06273		ACSL5	6.30628e-13	8.66041		ADI1	6.8451e-11	-2.094		ADAMTS9	2.66748e-05	-2.29156		AHNAK2	5.77063e-09	-2.65254		ASS1	8.28964e-08	-4.20723
ACOT13	acyl-CoA thioesterase 13		Ang	angiogenin, ribonuclease, RNase A famil		ALDH1A3	1.18849e-09	2.86543		ACSS2	1.57465e-08	-2.06618		ADM	2.5165e-06	2.28294		ADRB2	6.91558e-07	6.49869		AHSA2	2.54013e-06	-3.59402		ATAD2	6.86868e-12	2.06871
ACSF2	acyl-CoA synthetase family member 2		BBS12	Bardet-Biedl syndrome 12		ALG10	2.47794e-05	2.08356		ADAMTS5	1.88373e-13	-3.78961		ADRB2	0.000129214	3.50791		AEN	9.01527e-14	5.48976		ALDH1A3	3.82713e-16	9.91467		ATP9A	1.66787e-10	-2.4513
ACSL5	acyl-CoA synthetase long-chain family m		BCL11A	B-cell CLL/lymphoma 11A (zinc finger pr		ALPK1	2.77781e-07	-3.03864		ADAMTS9	3.7964e-07	-3.08249		AEN	7.99982e-14	5.54708		AFP	1.72949e-06	3.37732		ALG10	1.65743e-05	2.13341		AURKB	4.67331e-11	2.14235
ACSS2	acyl-CoA synthetase short-chain family		BEND6	BEN domain containing 6		AMACR	1.71285e-12	-4.30673		ADCK1	2.19662e-06	-2.20017		AFP	2.62296e-05	2.70299		AGGF1	2.8682e-15	-2.06885		ALPK1	4.82883e-05	-2.14725		Abcc3	3.8121e-08	-3.3083
ADAMTS5	ADAM metallopeptidase with thrombospond		BTBD2	BTB (POZ) domain containing 2		AMACR	8.78642e-07	-4.2485		ADRB2	2.05452e-08	10.3557		AHSA2	4.60394e-06	-3.40721		AGXT2L2	2.42074e-06	-2.10549		AMACR	5.82947e-13	-4.68358		Acot4	1.29137e-08	2.55814
ADAMTS6	ADAM metallopeptidase with thrombospond		C10orf116	chromosome 10 open reading frame 116		APOBEC3B	3.04807e-07	2.21923		AEN	9.38425e-15	6.74797		AIMP2	1.79453e-11	2.06072		AHNAK2	1.82772e-10	-3.27291		ANKRD12	0.000344378	-2.05617		Acyp2	3.47434e-07	-2.5043
ADAMTS9	ADAM metallopeptidase with thrombospond		C11orf52	chromosome 11 open reading frame 52		ARHGAP11A	7.59124e-07	2.05787		AFP	1.67681e-08	5.14463		AKAP12	2.05088e-05	2.65805		AHSA2	6.78948e-06	-3.29179		APOBEC3B	1.19406e-08	2.64929		Adamts1	3.33273e-07	2.25437
ADCK1	aarF domain containing kinase 1		C12orf5	chromosome 12 open reading frame 5		ARHGEF6	1.07327e-09	-4.61524		AGGF1	2.87807e-16	-2.25915		ALDH1A3	4.87846e-18	17.1636		ALAS1	8.84e-12	2.31315		APOBEC3G	0.000145755	2.10394		Adamtsl3	6.05401e-05	-2.30293
ADI1	acireductone dioxygenase 1		C16orf75	chromosome 16 open reading frame 75		ARL15	9.08681e-07	-2.34594		AGPAT3	8.56406e-11	-2.0898		ALDH5A1	1.29358e-09	-2.76799		ALDH1A3	6.02708e-18	16.6693		APOL1	1.38845e-08	-3.24674		Adora2a	2.84042e-06	2.03562
ADM	adrenomedullin		C1orf135	chromosome 1 open reading frame 135		ARMCX3	1.27696e-11	-2.20461		AGPAT5	6.18609e-09	-2.09224		ALDH7A1	1.64473e-12	-3.06685		ALDH5A1	1.76145e-07	-2.13552		ARHGAP11A	5.56943e-07	2.08915		Adora2b	7.38123e-13	3.78228
ADRB2	adrenergic, beta-2-, receptor, surface		C1orf186	chromosome 1 open reading frame 186		ASB13	8.08094e-09	-2.17528		AGXT2L2	6.07728e-07	-2.26707		AMACR	4.05689e-13	-4.82192		ALDH7A1	1.69209e-09	-2.15907		ARHGAP19	4.7126e-13	2.30151		Akr1c1	0.000230239	-2.37499
AEN	apoptosis enhancing nuclease		C1orf213	chromosome 1 open reading frame 213		ASB8	5.09714e-10	-2.08631		AHNAK2	8.7718e-09	-2.59051		AMDHD2	2.27703e-08	2.22765		ALG10	7.68678e-06	2.23316		ARHGEF17	9.29078e-07	-2.03974		Ang	1.63484e-06	-3.6048
AFP	alpha-fetoprotein		C1ql1	complement component 1, q subcomponent-		ASS1	0.000121236	-2.32794		AHSA2	4.03311e-05	-2.82026		AMMECR1L	7.68217e-11	2.0037		ALPK1	4.69738e-06	-2.49874		ARHGEF6	5.76707e-07	-2.84021		B4GALNT1	1.65678e-07	2.11957
AGGF1	angiogenic factor with G patch and FHA		C3orf52	chromosome 3 open reading frame 52		ATAD2	1.34874e-12	2.20687		AIG1	3.31281e-09	-2.04574		ANGPTL4	4.78333e-07	2.47761		AMACR	3.78889e-13	-4.84871		ASF1B	1.54251e-07	2.21168		BARD1	2.55461e-07	2.00402
AGPAT3	1-acylglycerol-3-phosphate O-acyltransf		C3orf59	chromosome 3 open reading frame 59		ATF5	1.10835e-08	2.06715		AKAP12	1.94884e-06	3.20165		ANKRD10	5.0506e-07	-2.63814		ANGPTL4	6.20052e-09	3.27744		ASS1	1.02108e-06	-3.38864		BBS12	3.15854e-05	-2.0247
AGPAT5	1-acylglycerol-3-phosphate O-acyltransf		C4orf34	chromosome 4 open reading frame 34		ATP6V0A2	3.41057e-08	2.38713		AKR1A1	5.55278e-09	-2.07682		ANKRD57	2.33907e-08	2.142		ANKRD12	6.14779e-08	-3.96194		ATP9A	1.4094e-10	-2.47175		BCKDHA	1.44833e-05	-2.17973
AGXT2L2	alanine-glyoxylate aminotransferase 2-l		C5orf13	chromosome 5 open reading frame 13		ATP6V0A4	0.000161653	2.26273		ALAS1	2.97192e-10	2.00085		ANXA6	2.8069e-05	-2.17543		ANTXR2	0.000648749	2.06609		ATXN1	2.34159e-07	-2.08553		BCL11A	1.95584e-09	-2.57437
AHNAK2	AHNAK nucleoprotein 2		C5orf39	chromosome 5 open reading frame 39		ATXN1	6.3469e-10	-2.84516		ALDH1A3	1.48888e-14	6.75907		APOBEC3G	2.32282e-05	2.3846		APOBEC3B	9.1148e-09	2.69117		AURKB	7.62114e-12	2.31473		BEND6	2.13264e-06	-2.38256
AHSA2	AHA1, activator of heat shock 90kDa pro		C7orf40	chromosome 7 open reading frame 40		Ablim3	2.96985e-07	2.42906		ALDH5A1	1.11271e-07	-2.18392		APOL1	1.05391e-10	-4.72783		APOL1	3.22077e-11	-5.23991		Abcc3	7.46023e-10	-4.50552		BRCA1	5.96769e-06	2.22074
AIG1	androgen-induced 1		CABLES1	Cdk5 and Abl enzyme substrate 1		Acot4	8.22486e-11	3.49191		ALDH7A1	2.14966e-10	-2.37235		APOL6	5.63257e-07	2.45841		ARHGAP19	5.86049e-13	2.28017		Ablim3	3.2796e-06	2.12496		BTBD2	7.72805e-08	-2.1912
AIMP2	aminoacyl tRNA synthetase complex-inter		CACHD1	cache domain containing 1		Adamts1	4.08471e-08	2.52933		ALG10	5.17399e-06	2.28703		ARHGEF17	4.33366e-07	-2.11711		ARHGEF10L	1.09541e-08	-2.00967		Acot4	3.56453e-11	3.69959		BUB1	6.74734e-07	2.01174
AKAP12	A kinase (PRKA) anchor protein 12		CALCOCO1	calcium binding and coiled-coil domain		Adora2a	3.3286e-06	2.01941		AMACR	3.46994e-14	-5.94997		ARHGEF6	2.11997e-09	-4.35497		ARHGEF17	7.36692e-08	-2.31635		Acyp2	9.66166e-06	-2.07004		Blm	1.98216e-10	2.57984
AKR1A1	aldo-keto reductase family 1, member A1		CAND2	cullin-associated and neddylation-disso		Adora2b	5.97748e-12	3.29631		AMN1	3.9166e-06	-2.17525		ARL15	2.01925e-06	-2.24142		ARHGEF6	5.18216e-09	-4.04447		Adamts1	3.98078e-09	2.90295		Bnc2	0.000254523	-2.15451
AKR1B15	aldo-keto reductase family 1, member B1		CCNA1	cyclin A1		Akr1c1	3.33909e-05	-2.78419		ANGPTL4	7.09931e-07	2.42		ARL4D	5.60657e-07	2.58684		ARL5B	4.54151e-06	2.26871		Adamtsl3	6.51232e-05	-2.29108		C10orf116	9.66643e-10	3.61075
ALAS1	aminolevulinate, delta-, synthase 1		CCND1	cyclin D1		Ang	1.99105e-07	-4.37173		ANTXR2	0.000638583	2.06856		ARL5B	2.96933e-06	2.32711		ARNTL2	7.75723e-07	2.10609		Adcy6	7.68268e-07	-2.23413		C10orf47	8.46486e-11	2.17981
ALDH1A3	aldehyde dehydrogenase 1 family, member		CD9	CD9 molecule		Apoc1	5.89708e-09	2.98466		APOBEC3B	2.89464e-09	2.88165		ARL6IP5	6.34883e-11	-2.35522		ASF1B	6.1503e-07	2.06565		Adora2a	2.12787e-08	2.65509		C11orf52	9.16987e-07	-2.62055
ALDH5A1	aldehyde dehydrogenase 5 family, member		CD97	CD97 molecule		B4GALNT1	3.54873e-10	2.94361		APOL1	3.2657e-08	-3.06055		ARNTL2	1.90293e-07	2.26306		ASS1	6.32584e-06	-2.92315		Adora2b	2.19558e-15	5.96944		C11orf82	3.54203e-13	2.42302
ALDH7A1	aldehyde dehydrogenase 7 family, member		CD99L2	CD99 molecule-like 2		BAMBI	9.35586e-06	2.09724		APOM	5.03091e-06	-2.24372		ASB1	5.38604e-11	2.64606		ATIC	2.47785e-11	2.00518		Afap1l2	2.79309e-06	-2.01338		C12orf5	1.86963e-10	2.63735
ALG10	asparagine-linked glycosylation 10, alp		CDC25A	cell division cycle 25 homolog A (S. po		BATF3	4.25908e-07	2.0041		ARHGAP19	5.65643e-14	2.53191		ASB8	4.16438e-13	-2.92837		ATP10A	0.000108335	-2.36518		Ang	5.39631e-08	-4.95919		C12orf57	7.63851e-07	-2.04049
ALPK1	alpha-kinase 1		CDCP1	CUB domain containing protein 1		BBS12	7.29944e-07	-2.53354		ARHGEF17	1.12517e-07	-2.26603		ASPM	2.02707e-06	-2.31249		ATP6V0A2	1.11979e-06	2.00435		Ankzf1	8.7094e-07	-2.19951		C14orf28	1.91117e-08	-2.08293
AMACR	C1q and tumor necrosis factor related p		CDH13	cadherin 13, H-cadherin (heart)		BBS2	2.44052e-09	-2.18739		ARHGEF6	1.64424e-10	-5.46084		ASS1	0.000437622	2.11361		ATP9A	7.8736e-11	-2.54492		Atrx	7.11318e-10	-2.2267		C14orf45	2.33193e-08	-3.50632
AMACR	alpha-methylacyl-CoA racemase		CHST11	carbohydrate (chondroitin 4) sulfotrans		BCKDHA	2.76295e-06	-2.41271		ARL5B	1.66475e-06	2.41013		ATF5	2.35516e-15	5.18143		ATXN1	1.60811e-08	-2.38127		B4GALNT1	6.54731e-08	2.21738		C16orf75	3.06788e-08	2.21833
AMDHD2	amidohydrolase domain containing 2		CMPK2	cytidine monophosphate (UMP-CMP) kinase		BCL11A	7.04036e-09	-2.40626		ARMC4	3.20436e-05	-2.23819		ATP10A	8.93194e-05	-2.40028		AURKB	6.46649e-11	2.11415		BARD1	7.6912e-09	2.368		C17orf103	7.41202e-08	-2.49704
AMMECR1L	AMME chromosomal region gene 1-like		CRIP2	cysteine-rich protein 2		BDH1	4.78171e-10	3.07695		ARNTL2	4.65319e-07	2.16112		ATP13A3	1.68581e-08	2.03304		Abcc3	2.24274e-09	-4.11338		BBS12	4.84085e-08	-3.02265		C17orf53	1.73359e-09	2.06972
AMN1	antagonist of mitotic exit network 1 ho		CTNNBIP1	catenin, beta interacting protein 1		BEND6	1.31607e-07	-2.84237		ASB13	3.45602e-11	-2.87079		ATP6V0A2	1.03286e-09	2.90832		Ablim3	7.15532e-08	2.64172		BBS2	2.14946e-10	-2.45247		C18orf54	2.88184e-08	2.01295
ANGPTL4	angiopoietin-like 4		CYP27C1	cytochrome P450, family 27, subfamily C		BPHL	1.05881e-09	-2.19439		ASS1	5.13459e-08	-4.39333		AVL9	2.0722e-12	2.02633		Acot4	3.47869e-11	3.70594		BCKDHA	2.93444e-06	-2.40365		C19orf18	5.49418e-06	-2.37357
ANKRD10	ankyrin repeat domain 10		Cblb	Cas-Br-M (murine) ecotropic retroviral		BTBD11	4.2449e-06	-2.03392		ATP10A	0.000596081	-2.07806		AVPI1	4.60412e-14	4.84205		Adamts1	4.24453e-09	2.89149		BCL11A	8.90394e-13	-4.19191		C1RL	1.98318e-07	-2.647
ANKRD12	ankyrin repeat domain 12		Ces2	carboxylesterase 2 (intestine, liver)		BTBD2	1.18717e-09	-2.72988		ATP6V1E2	5.73528e-09	-2.16836		Abcc3	4.59325e-08	-3.2637		Adamtsl3	2.14005e-06	-2.9379		BEND6	1.30759e-07	-2.84359		C1orf135	8.19206e-08	2.18051
ANKRD57	ankyrin repeat domain 57		Chac2	ChaC, cation transport regulator homolo		BTG3	5.78454e-14	2.17802		ATP9A	4.34775e-10	-2.34059		Ablim3	9.06139e-10	3.51387		Adcy6	7.09446e-07	-2.24378		BICD1	3.90553e-07	-2.11158		C1orf186	4.9916e-09	-3.05142
ANTXR2	anthrax toxin receptor 2		Cobll1	COBL-like 1		BTN3A1	3.42711e-08	-2.69465		ATXN1	7.83873e-11	-3.23272		Acat2	2.99859e-15	-4.56975		Adora2a	2.42508e-09	3.03192		BID	1.65015e-08	2.1897		C1orf213	0.000236515	-2.29388
ANXA6	annexin A6		Col6a3	collagen, type VI, alpha 3		BTN3A2	5.73749e-08	-2.45842		AURKB	2.53445e-10	2.00332		Acot4	9.80748e-12	4.06102		Adora2b	1.18663e-15	6.31082		BOD1L	2.42999e-06	-2.2241		C1ql1	1.05917e-05	-2.03329
APOBEC3B	apolipoprotein B mRNA editing enzyme, c		Cpt1c	carnitine palmitoyltransferase 1C		BUB1	1.49946e-07	2.16182		Abcc3	1.32902e-10	-5.23939		Acox3	1.67248e-07	-2.16102		Afap1l2	6.558e-11	-3.79381		BPHL	5.25674e-10	-2.26464		C21orf45	3.57891e-11	2.20248
APOBEC3G	apolipoprotein B mRNA editing enzyme, c		Cyp24a1	cytochrome P450, family 24, subfamily A		Baz2b	1.15411e-05	-2.18562		Ablim3	2.49902e-06	2.15644		Adamts1	1.69321e-08	2.66103		Aldh3b1	3.48117e-07	-2.28765		BPTF	8.61297e-08	-2.64546		C2orf81	4.95719e-07	-2.05915
APOL1	apolipoprotein L, 1		DNAL4	dynein, axonemal, light chain 4		Bbs1	1.20824e-09	-2.49143		Acat2	1.4415e-11	-2.67361		Adamtsl3	2.99633e-09	-5.09644		Ang	6.57648e-09	-6.15214		BRIX1	6.46656e-09	2.04272		C3orf52	8.16081e-10	2.60685
APOL6	apolipoprotein L, 6		Dbndd1	dysbindin (dystrobrevin binding protein		Bcl2l12	6.84223e-10	2.15681		Acot4	3.00344e-11	3.74456		Adcy6	1.48291e-07	-2.44729		Ankzf1	2.93924e-07	-2.33266		BST2	0.000382281	2.58683		C3orf59	9.21867e-14	2.73991
APOM	apolipoprotein M		EFEMP2	EGF-containing fibulin-like extracellul		Blm	2.8375e-09	2.26168		Adamts1	9.19636e-10	3.18591		Adora2a	7.45634e-11	3.84401		Arap2	1.33467e-07	-2.22748		BTBD2	1.72722e-09	-2.67273		C4orf34	1.72865e-09	-3.30575
ARHGAP11A	Rho GTPase activating protein 11A		ELFN2	extracellular leucine-rich repeat and f		Btn3a3	1.36414e-12	-4.547		Adcy6	2.89238e-07	-2.35706		Adora2b	3.52847e-18	11.6275		Atrx	2.38244e-12	-2.97016		BUB1	3.16982e-07	2.08491		C5orf13	8.73637e-05	-2.25834
ARHGAP19	Rho GTPase activating protein 19		ELL2	elongation factor, RNA polymerase II, 2		C10orf116	7.98422e-15	10.7705		Adora2b	6.80403e-16	6.64516		Adra2a	1.07018e-08	3.474		B3galnt1	2.34604e-08	2.50582		Baz2b	2.31892e-08	-3.26961		C5orf39	1.27013e-07	-2.68752
ARHGEF10L	Rho guanine nucleotide exchange factor		Echdc2	enoyl Coenzyme A hydratase domain conta		C11orf49	6.84954e-09	-2.219		Afap1l2	6.15713e-07	-2.17377		Afap1l2	5.16895e-08	-2.48374		B4GALNT1	3.11591e-08	2.30121		Bbs1	1.04838e-10	-2.84479		C5orf53	2.02883e-08	-2.50462
ARHGEF17	Rho guanine nucleotide exchange factor		Enc1	ectodermal-neural cortex (with BTB-like		C11orf52	2.57829e-06	-2.45199		Akr1c1	1.49633e-06	-3.63592		Ak2	9.18823e-15	-2.74086		BAMBI	5.59834e-08	2.84801		Blm	1.46061e-09	2.33423		C6orf105	3.41665e-09	-2.6012
ARHGEF6	Rac/Cdc42 guanine nucleotide exchange f		F12	coagulation factor XII (Hageman factor)		C11orf82	5.10017e-14	2.6566		Aldh3b1	7.36501e-08	-2.49318		Akna	8.00427e-11	3.62633		BARD1	9.52442e-10	2.64338		Bnc2	8.0805e-05	-2.34377		C6orf226	2.53204e-07	-2.38398
ARL15	ADP-ribosylation factor-like 15		FANCE	Fanconi anemia, complementation group E		C12orf5	8.03006e-14	4.29781		Amz2	7.97263e-11	-2.04497		Akr1c1	0.000935879	-2.11809		BBS12	1.30944e-05	-2.13008		C10orf116	8.65872e-14	8.22449		C6orf99	1.78548e-09	2.36304
ARL4D	ADP-ribosylation factor-like 4D		FANK1	fibronectin type III and ankyrin repeat		C14orf159	5.85497e-08	-2.80916		Ang	3.86297e-08	-5.12649		Alad	5.36858e-09	-2.12606		BBS2	3.57614e-12	-3.05711		C10orf47	1.08994e-12	2.66814		C7orf29	5.03065e-11	-5.13318
ARL5B	ADP-ribosylation factor-like 5B		FIGNL1	fidgetin-like 1		C14orf182	2.57973e-09	2.72985		Ankzf1	5.73479e-08	-2.55811		Anapc4	9.35995e-08	-2.18533		BCAT2	1.25805e-08	-2.09719		C10orf78	4.92769e-07	2.20993		C7orf40	4.63598e-10	2.12525
ARL6IP5	ADP-ribosylation-like factor 6 interact		FOSL1	FOS-like antigen 1		C14orf28	4.38579e-09	-2.22626		Atrx	3.73731e-11	-2.56243		Ang	1.92307e-08	-5.50083		BCKDHA	1.59155e-06	-2.49794		C11orf52	4.31914e-07	-2.75391		C9orf100	6.2235e-06	2.20843
ARMC4	armadillo repeat containing 4		Fam105a	family with sequence similarity 105, me		C16orf73	9.34432e-11	4.34851		B3galnt1	8.42477e-09	2.65485		Ankzf1	6.68858e-07	-2.23077		BCL11A	1.1852e-12	-4.10443		C11orf80	5.77439e-06	-2.12355		C9orf109	3.81352e-07	2.21178
ARMCX3	armadillo repeat containing, X-linked 3		GAA	glucosidase, alpha; acid		C16orf75	1.1204e-09	2.62969		BAMBI	2.5147e-08	3.00121		Asb6	1.18179e-09	2.01333		BEND6	1.14687e-08	-3.36264		C11orf82	6.26519e-14	2.62977		C9orf9	9.42812e-07	-2.94925
ARNTL2	aryl hydrocarbon receptor nuclear trans		GADD45A	growth arrest and DNA-damage-inducible,		C17orf103	7.21565e-07	-2.20385		BARD1	4.13415e-09	2.4445		Atg12	1.17738e-14	2.38814		BICC1	0.000894032	-2.07848		C12orf5	1.24859e-12	3.5481		C9orf95	1.46464e-11	-2.78581
ASB1	ankyrin repeat and SOCS box-containing		GCH1	GTP cyclohydrolase 1		C17orf53	4.20606e-10	2.19848		BATF3	5.23052e-08	2.21295		Atp1b1	1.91552e-07	-2.09725		BID	3.69591e-09	2.35326		C13orf27	6.26171e-11	2.04351		CABLES1	9.84571e-12	3.73118
ASB13	ankyrin repeat and SOCS box-containing		GCNT1	glucosaminyl (N-acetyl) transferase 1,		C17orf97	1.13476e-08	-2.99045		BBS12	3.02814e-08	-3.12139		Atp6v0e2	3.02169e-12	-2.32017		BNIP3L	4.97123e-11	-2.42941		C14orf159	1.76235e-06	-2.2864		CACHD1	4.98645e-13	4.84536
ASB8	ankyrin repeat and SOCS box-containing		GLIPR2	GLI pathogenesis-related 2		C19orf21	4.56446e-09	2.26386		BBS2	2.50347e-12	-3.12214		Atrx	4.33186e-10	-2.27735		BPHL	2.58711e-09	-2.1105		C14orf28	1.61099e-08	-2.0987		CACNA2D3	0.0129817	2.14204
ASF1B	ASF1 anti-silencing function 1 homolog		GSDMB	gasdermin B		C19orf48	1.14991e-11	2.56862		BCKDHA	9.93782e-08	-2.99986		B3GNTL1	1.21945e-11	-2.90206		BPTF	5.23296e-12	-5.38797		C14orf37	6.97238e-05	-2.28696		CALB1	1.44387e-08	-3.675
ASPM	asp (abnormal spindle) homolog, microce		GSTT1	glutathione S-transferase theta 1		C1RL	8.3529e-10	-3.85398		BCKDHB	9.83675e-07	-2.02365		B3galnt1	6.53133e-08	2.37004		BRIX1	3.49438e-10	2.32393		C16orf75	2.47104e-08	2.24175		CALCOCO1	7.1191e-10	-2.97192
ASS1	argininosuccinate synthetase 1		H19	H19, imprinted maternally expressed tra		C1orf135	1.2149e-08	2.39995		BCL11A	5.78024e-12	-3.66867		BACE1	2.7854e-12	-2.09654		BST2	0.00105401	2.351		C17orf103	8.68699e-09	-2.83413		CAND2	1.39719e-13	3.6532
ATAD2	ATPase family, AAA domain containing 2		HBEGF	heparin-binding EGF-like growth factor		C1orf163	1.40609e-05	2.32103		BDH1	5.02467e-08	2.35549		BAMBI	5.62814e-11	4.73184		BTBD2	2.16527e-10	-3.01705		C17orf53	1.68178e-09	2.07232		CAPS	3.02497e-05	-2.54794
ATF5	activating transcription factor 5		HCFC1R1	host cell factor C1 regulator 1 (XPO1 d		C1orf186	2.41804e-11	-4.48278		BEND6	7.66614e-10	-4.12601		BATF3	7.21196e-11	3.18689		BTG3	8.0436e-14	2.15004		C17orf97	1.28703e-08	-2.96617		CBLN2	0.000174749	-4.00482
ATIC	5-aminoimidazole-4-carboxamide ribonucl		HGSNAT	heparan-alpha-glucosaminide N-acetyltra		C1orf213	4.39015e-06	-3.16165		BNIP3L	7.00578e-10	-2.15441		BBS12	3.79622e-06	-2.29114		BTN3A1	4.95756e-07	-2.30935		C18orf54	6.66966e-09	2.14534		CCNA1	1.63809e-05	2.17878
ATP10A	ATPase, class V, type 10A		HMGA1	high mobility group AT-hook 1		C1ql1	1.29288e-05	-2.01161		BPHL	1.76742e-11	-2.67334		BBS2	4.40456e-10	-2.3683		BUB1	5.14286e-07	2.03755		C19orf18	1.11705e-10	-5.36547		CCNA2	1.79381e-08	2.28956
ATP13A3	ATPase type 13A3		HOOK2	hook homolog 2 (Drosophila)		C21orf119	1.08356e-07	-2.16885		BPTF	1.8497e-07	-2.52686		BCKDHB	6.88595e-08	-2.31032		Bat2l2	1.95046e-09	-2.21135		C19orf48	3.62865e-10	2.18684		CCND1	6.06682e-10	3.05829
ATP6V0A2	ATPase, H+ transporting, lysosomal V0 s		HSD17B6	hydroxysteroid (17-beta) dehydrogenase		C21orf45	1.02927e-10	2.10797		BRE	6.03611e-08	-2.19526		BCL11A	3.41038e-12	-3.80515		Baz2b	5.36939e-11	-5.32029		C1RL	4.60366e-10	-4.03437		CCNG2	9.7303e-09	-3.33506
ATP6V0A4	ATPase, H+ transporting, lysosomal V0 s		HSF2BP	heat shock transcription factor 2 bindi		C2orf63	0.00468131	-2.03024		BRIX1	2.10238e-10	2.38038		BEND6	4.73651e-07	-2.61613		Bbs1	5.95287e-12	-3.38387		C1orf135	1.37058e-08	2.38499		CCT6B	7.31857e-07	-2.20317
ATP6V1E2	ATPase, H+ transporting, lysosomal 31kD		HTRA1	HtrA serine peptidase 1		C2orf81	1.04837e-07	-2.2218		BST2	0.00117096	2.32771		BICD1	1.12167e-08	-2.53927		Blm	4.49848e-10	2.4737		C1orf163	8.40893e-06	2.40027		CD9	1.00162e-12	5.11976
ATP9A	ATPase, class II, type 9A		Hapln4	hyaluronan and proteoglycan link protei		C3orf52	9.84e-14	4.69942		BTBD11	2.75516e-07	-2.35318		BID	2.11642e-09	2.4198		Bnc2	2.93303e-05	-2.5269		C1orf186	6.57362e-13	-6.12795		CD97	5.81054e-06	2.00569
ATXN1	ataxin 1		IFI27	interferon, alpha-inducible protein 27		C3orf59	1.04482e-10	2.00757		BTBD2	1.30954e-11	-3.61475		BIVM	2.50046e-11	-2.2341		Btn3a3	2.04137e-09	-2.77074		C1orf213	5.01872e-09	-5.91236		CD99L2	1.84678e-11	-2.06569
AURKB	aurora kinase B		IFI44	interferon-induced protein 44		C4orf3	1.16833e-07	-2.15734		BTG3	4.24987e-15	2.4299		BOD1L	1.45387e-05	-2.01493		C10orf116	2.12493e-14	9.60777		C1orf63	2.21639e-05	-3.09218		CDC25A	1.55502e-14	3.59423
AVL9	AVL9 homolog (S. cerevisiase)		IFI6	interferon, alpha-inducible protein 6		C4orf34	1.00013e-08	-2.94451		BTN3A1	2.80671e-09	-3.15585		BPTF	8.08467e-08	-2.65567		C10orf47	1.16974e-13	3.00627		C1ql1	7.6109e-07	-2.35378		CDC7	1.43762e-09	2.45208
AVPI1	arginine vasopressin-induced 1		IGDCC4	immunoglobulin superfamily, DCC subclas		C4orf47	5.32815e-08	-2.83771		BTN3A2	2.4563e-09	-2.95835		BRAF	9.22093e-08	2.33969		C10orf78	3.82205e-08	2.54099		C21orf45	6.60097e-12	2.37242		CDCA5	2.3699e-13	2.34408
Abcc3	ATP-binding cassette, sub-family C (CFT		IL32	interleukin 32		C5ar1	0.000100996	2.85492		BUB1	1.43991e-08	2.43589		BRAP	2.60998e-10	2.2998		C11orf52	2.71541e-08	-3.33956		C3orf52	2.47483e-11	3.19095		CDCP1	1.46974e-07	2.07979
Ablim3	actin binding LIM protein family, membe		IL6	interleukin 6 (interferon, beta 2)		C5orf13	7.09668e-07	-3.22678		Baz2b	2.17314e-08	-3.28482		BRD8	9.26517e-08	-2.10983		C11orf80	1.43473e-05	-2.0202		C3orf59	4.0567e-15	3.25414		CDH13	6.89311e-09	12.9767
Acat2	acetyl-Coenzyme A acetyltransferase 2		IRAK2	interleukin-1 receptor-associated kinas		C5orf27	2.53624e-07	6.50325		Bbs1	9.4872e-13	-3.82565		BTBD2	3.21e-08	-2.28874		C11orf82	2.52725e-14	2.75218		C4orf34	8.85889e-11	-4.0976		CDH16	1.16415e-10	-8.26267
Acot4	acyl-CoA thioesterase 4		ISG15	ISG15 ubiquitin-like modifier		C5orf39	1.76577e-08	-3.05279		Bcl2l12	3.69963e-11	2.46452		BTD	2.19083e-10	-3.1286		C12orf5	8.72995e-14	4.27131		C5ar1	0.000641674	-2.40863		CDKN1A	6.84311e-09	-3.32947
Acox3	acyl-Coenzyme A oxidase 3, pristanoyl		ITPR1	inositol 1,4,5-triphosphate receptor, t		C5orf53	1.30692e-07	-2.26738		Blm	7.36367e-09	2.16437		BTG3	4.73884e-16	2.69209		C13orf27	1.53773e-11	2.16103		C5orf13	9.69536e-08	-3.79091		CENPE	0.00661212	2.04611
Acyp2	acylphosphatase 2, muscle type		IVNS1ABP	influenza virus NS1A binding protein		C5orf62	1.51999e-08	-2.15631		Bnc2	1.27227e-06	-3.22003		BTN3A1	2.09057e-06	-2.13596		C14orf159	6.17032e-07	-2.4308		C5orf39	2.4566e-08	-2.98656		CENPI	7.52163e-07	2.26162
Adamts1	ADAM metallopeptidase with thrombospond		Ifit2	interferon-induced protein with tetratr		C6orf105	2.71127e-07	-2.08027		Brwd3	2.312e-09	-2.24204		BTN3A2	3.47315e-08	-2.52852		C14orf182	7.52928e-07	2.02958		C5orf53	6.61924e-10	-3.06289		CENPK	1.49713e-05	2.46731
Adamtsl3	ADAMTS-like 3		Ifit3	interferon-induced protein with tetratr		C6orf225	1.18457e-08	-2.76518		Btn3a3	2.21344e-13	-5.2772		Baz2b	1.05071e-07	-2.94333		C14orf28	1.78407e-09	-2.3229		C6orf1	3.30324e-08	2.02397		CEP72	1.49791e-10	2.11675
Adcy6	adenylate cyclase 6		Ifitm1	interferon induced transmembrane protei		C6orf226	3.25328e-08	-2.68547		C10orf114	1.94722e-09	-2.48947		Bbs1	2.82746e-11	-3.07158		C14orf37	7.44291e-07	-3.19927		C6orf105	3.98496e-07	-2.04284		CFB	0.00835949	-2.28843
Adora2a	adenosine A2a receptor		Impa2	inositol(myo)-1(or 4)-monophosphatase 2		C6orf57	3.69255e-07	-2.06274		C10orf116	9.16551e-16	14.1274		Bmf	1.26494e-08	-4.02602		C16orf75	4.21779e-08	2.18462		C6orf226	4.77565e-07	-2.30137		CHEK1	1.62868e-08	2.00311
Adora2b	adenosine A2b receptor		KIF12	kinesin family member 12		C7orf29	3.69003e-16	-20.0652		C10orf78	2.41836e-09	2.99741		Bnc2	1.2567e-06	-3.22322		C17orf103	5.68642e-09	-2.90937		C6orf99	2.76417e-11	2.9511		CHST11	1.07605e-06	2.42029
Adra2a	adrenergic, alpha-2A-, receptor		KRT81	keratin 81		C7orf40	5.26399e-13	2.95207		C11orf49	2.88007e-08	-2.07863		Bri3	4.85547e-07	2.19084		C17orf53	6.16473e-10	2.16223		C7orf29	5.42627e-15	-13.7809		CKAP2L	1.65459e-08	2.21747
Afap1l2	actin filament associated protein 1-lik		Klf4	Kruppel-like factor 4 (gut)		C7orf50	1.60783e-07	-2.30784		C11orf52	4.58331e-08	-3.21551		Brwd3	7.07543e-11	-2.66508		C18orf54	2.13218e-10	2.52877		C7orf40	2.12127e-13	3.10885		CLDN2	9.76432e-05	3.43022
Ak2	adenylate kinase 2		LAMC2	laminin, gamma 2		C7orf60	6.51817e-09	-3.11324		C11orf80	1.54507e-06	-2.28705		Btn3a3	1.48317e-11	-3.80376		C19orf18	7.89434e-10	-4.51633		C7orf60	7.30867e-07	-2.33106		CLYBL	3.10185e-07	-3.35514
Akna	AT-hook transcription factor		LIF	leukemia inhibitory factor (cholinergic		C9orf100	1.21235e-06	2.43478		C11orf82	6.23091e-14	2.63048		Bves	9.77606e-07	2.11826		C19orf48	1.31078e-10	2.28778		C7orf63	5.48584e-05	-2.54316		CMPK2	1.21522e-09	7.72311
Akr1c1	aldo-keto reductase family 1, member C1		LIN9	lin-9 homolog (C. elegans)		C9orf109	3.0011e-07	2.23962		C12orf5	7.86434e-15	5.15355		C10orf114	1.53352e-07	-2.01748		C1GALT1	2.23736e-11	2.00892		C9orf100	2.29812e-05	2.04815		CMTM7	3.01533e-12	2.0782
Alad	aminolevulinate, delta-, dehydratase		LOC375190	hypothetical protein LOC375190		C9orf9	2.96592e-05	-2.31466		C13orf27	9.56771e-13	2.4387		C10orf116	3.82993e-16	15.8831		C1orf112	9.08355e-09	2.05097		C9orf109	6.88298e-08	2.42367		CPA4	1.01488e-09	3.29903
Aldh3b1	aldehyde dehydrogenase 3 family, member		LOC729013	hypothetical protein LOC729013		C9orf95	5.99886e-13	-3.35708		C14orf159	2.38203e-08	-2.97772		C10orf47	4.8723e-15	3.64137		C1orf124	2.22828e-10	2.24704		C9orf9	1.18092e-06	-2.90112		CRIP2	1.17803e-07	-2.70213
Amz2	archaelysin family metallopeptidase 2		LOC729859	WW domain binding protein 1		CABLES1	4.53331e-07	2.02783		C14orf182	5.29222e-09	2.62051		C10orf88	9.89784e-12	2.17069		C1orf135	1.6382e-08	2.36316		C9orf95	9.59035e-13	-3.26104		CRYAB	2.19665e-05	-2.60954
Anapc4	anaphase promoting complex subunit 4		LPHN2	latrophilin 2		CACHD1	1.00848e-13	5.54371		C14orf28	3.00619e-10	-2.53813		C11orf24	2.05309e-12	2.05713		C1orf163	1.24001e-06	2.72951		CABLES1	1.37107e-11	3.6466		CRYL1	9.93758e-09	-3.7111
Ang	angiogenin, ribonuclease, RNase A famil		LRIG3	leucine-rich repeats and immunoglobulin		CALCOCO1	7.61619e-12	-4.02923		C14orf37	3.53709e-07	-3.39281		C11orf49	7.09399e-09	-2.21537		C1orf186	5.98822e-14	-7.76325		CACHD1	2.50712e-13	5.12836		CTNNBIP1	1.79965e-07	-2.29051
Ankzf1	ankyrin repeat and zinc finger domain c		LRRC27	leucine rich repeat containing 27		CAND2	5.02103e-19	11.1575		C16orf58	3.01906e-11	-2.38783		C11orf52	1.35684e-08	-3.51518		C1orf213	1.07401e-08	-5.47099		CADM1	0.00741276	-2.25465		CYP1B1	8.27071e-10	3.03637
Apoc1	apolipoprotein C-I		MAGEB2	melanoma antigen family B, 2		CAPN1	1.98739e-09	-2.05245		C16orf7	1.03287e-07	-2.31088		C11orf70	1.46268e-08	-2.2525		C1orf63	8.40252e-05	-2.74794		CALB1	9.34164e-07	-2.718		CYP27C1	2.1265e-06	-2.41312
Arap2	ArfGAP with RhoGAP domain, ankyrin repe		MAGEH1	melanoma antigen family H, 1		CASC5	9.05428e-10	2.21662		C16orf73	1.3206e-06	2.29018		C11orf80	2.74274e-06	-2.21372		C1ql1	4.58107e-09	-3.24052		CALCOCO1	1.11474e-12	-4.66918		Cblb	1.90323e-10	-2.49655
Asb6	ankyrin repeat and SOCS box-containing		MAL2	mal, T-cell differentiation protein 2		CBLN2	0.000604834	-3.41806		C16orf75	5.24012e-09	2.42294		C12orf5	3.25673e-14	4.6016		C21orf45	3.88708e-11	2.19478		CAND2	5.10568e-14	3.91064		Ccdc80	3.41767e-08	-2.79442
Atg12	ATG12 autophagy related 12 homolog (S.		MEGF9	multiple EGF-like-domains 9		CBY1	1.61709e-11	-2.2638		C17orf100	4.20737e-08	-2.10884		C14orf159	7.20669e-06	-2.11148		C3	0.000164775	2.59758		CAPS	3.13335e-05	-2.54117		Cdc45	1.54244e-07	2.16052
Atp1b1	ATPase, Na+/K+ transporting, beta 1 pol		MEIS1	Meis homeobox 1		CCDC113	1.08578e-08	-2.23637		C17orf103	2.74503e-07	-2.3214		C14orf37	1.15172e-09	-5.6191		C3orf52	3.9111e-13	4.22882		CBLN2	2.63108e-06	-6.95851		Cdkl3	2.21471e-07	-2.03221
Atp6v0e2	ATPase, H+ transporting V0 subunit e2		MMP13	matrix metallopeptidase 13 (collagenase		CCDC125	4.95475e-08	-2.42301		C17orf53	2.37104e-10	2.25504		C15orf39	4.53652e-09	2.06013		C3orf59	1.86412e-15	3.40976		CCDC113	9.98539e-09	-2.24532		Cdt1	1.82307e-08	2.31549
Atrx	alpha thalassemia/mental retardation sy		MOSPD3	motile sperm domain containing 3		CCDC28A	8.41203e-06	-2.04502		C18orf54	5.12659e-10	2.41987		C16orf75	2.74995e-09	2.50584		C4orf34	3.64691e-11	-4.39168		CCDC125	1.65545e-09	-2.94956		Cenpq	1.57517e-08	2.05744
B3GNTL1	UDP-GlcNAc:betaGal beta-1,3-N-acetylglu		MPV17L	MPV17 mitochondrial membrane protein-li		CCDC92	6.19965e-08	-2.49263		C19orf18	4.71912e-07	-2.787		C17orf51	7.91859e-09	2.53521		C5ar1	0.00036678	-2.53552		CCDC86	1.11575e-07	2.22902		Ces2	5.7406e-15	-3.09896
B3galnt1	beta-1,3-N-acetylgalactosaminyltransfer		MRAP2	melanocortin 2 receptor accessory prote		CCL26	6.54442e-08	4.27009		C19orf48	1.09263e-12	2.90741		C17orf61	1.27319e-06	-2.08884		C5orf13	6.18447e-09	-4.82456		CCDC92	1.07302e-06	-2.13688		Chac2	0.000368377	2.03713
B4GALNT1	beta-1,4-N-acetyl-galactosaminyl transf		MT1F	metallothionein 1F		CCNA1	1.31816e-07	2.97111		C1orf124	7.38553e-10	2.13281		C17orf85	3.58021e-14	-2.5568		C5orf39	3.05483e-09	-3.44564		CCL26	9.26686e-09	5.12206		Chsy3	4.78897e-05	2.12549
BACE1	beta-site APP-cleaving enzyme 1		NFE2L3	nuclear factor (erythroid-derived 2)-li		CCNA2	2.05119e-09	2.56081		C1orf135	2.95423e-09	2.5879		C18orf8	5.60887e-10	2.12551		C5orf53	1.96805e-08	-2.50883		CCNA1	8.04983e-08	3.07463		Cobll1	4.35125e-11	-2.34925
BAMBI	BMP and activin membrane-bound inhibito		NIPAL3	NIPA-like domain containing 3		CCND1	5.46636e-08	2.3609		C1orf163	1.12395e-06	2.74805		C19orf18	1.4734e-08	-3.57189		C6orf1	2.59132e-09	2.26904		CCNA2	6.17861e-10	2.73558		Coch	7.92355e-07	2.20226
BARD1	BRCA1 associated RING domain 1		NIPSNAP1	nipsnap homolog 1 (C. elegans)		CCT6B	2.99093e-07	-2.31166		C1orf186	5.87083e-14	-7.77927		C19orf48	5.25412e-14	3.47959		C6orf226	3.03893e-07	-2.35976		CCND1	5.58747e-14	6.21792		Col6a3	8.6925e-10	13.5089
BATF3	basic leucine zipper transcription fact		NPNT	nephronectin		CD3EAP	5.85196e-08	2.35267		C1orf213	1.41923e-09	-6.75868		C1RL	1.86025e-06	-2.31258		C6orf99	1.41569e-10	2.69287		CCRN4L	2.21828e-08	2.28379		Cpt1c	1.69254e-07	2.90491
BBS12	Bardet-Biedl syndrome 12		NUDT15	nudix (nucleoside diphosphate linked mo		CD83	5.41723e-08	2.57546		C1orf57	4.13268e-08	-2.33276		C1orf124	9.07078e-10	2.11432		C7orf40	1.92362e-14	3.60151		CCT6B	1.92613e-06	-2.09445		Cyp24a1	9.15217e-08	8.03771
BBS2	Bardet-Biedl syndrome 2		Nicn1	nicolin 1		CD9	2.8889e-12	4.69024		C1orf63	0.00084522	-2.24683		C1orf135	2.26425e-07	2.07703		C7orf60	4.64979e-07	-2.39212		CD3EAP	5.4379e-08	2.36182		DCLK1	0.00515254	2.32618
BCAT2	branched chain aminotransferase 2, mito		Nptx2	neuronal pentraxin II		CD97	1.14049e-10	3.8834		C1ql1	8.11321e-10	-3.66168		C1orf163	2.29038e-06	2.61756		C7orf63	0.000170453	-2.32775		CD83	8.37589e-09	2.88206		DDX58	5.63247e-05	2.29728
BCKDHA	branched chain keto acid dehydrogenase		ORC6L	origin recognition complex, subunit 6 l		CD99L2	3.74533e-11	-2.01076		C20orf96	4.05833e-06	-2.09304		C1orf186	1.63358e-12	-5.6367		C9orf109	8.39046e-09	2.73249		CD9	2.18637e-13	5.84913		DGKI	2.13698e-09	-9.23102
BCKDHB	branched chain keto acid dehydrogenase		Oas3	2'-5'-oligoadenylate synthetase 3, 100k		CDC25A	8.08974e-14	3.24425		C21orf119	8.78479e-08	-2.19119		C1orf213	5.85722e-10	-7.45226		C9orf46	3.15968e-07	2.1208		CD97	2.34643e-08	2.72092		DHDPSL	5.82192e-05	-2.47733
BCL11A	B-cell CLL/lymphoma 11A (zinc finger pr		Odz2	odz, odd Oz/ten-m homolog 2 (Drosophila		CDCA5	1.80626e-14	2.64039		C21orf45	2.84384e-11	2.22417		C1orf63	0.000136414	-2.63376		C9orf9	6.58739e-07	-3.0282		CD99L2	2.10677e-11	-2.05522		DNA2	1.50975e-07	2.39311
BDH1	3-hydroxybutyrate dehydrogenase, type 1		PAQR7	progestin and adipoQ receptor family me		CDCA8	1.5363e-09	2.16961		C3orf52	1.51089e-14	5.48194		C1ql1	1.98351e-10	-4.06994		C9orf95	2.06227e-12	-3.11407		CDC25A	4.86157e-15	3.88161		DNAL4	1.33224e-07	-2.69172
BEND6	BEN domain containing 6		PCDHB14	protocadherin beta 14		CDCP1	1.51047e-09	2.61919		C3orf59	6.05917e-15	3.17866		C1r	3.49675e-06	3.44414		CABLES1	8.72261e-11	3.22639		CDC7	2.30884e-08	2.14394		DSCC1	5.0592e-13	2.36154
BICC1	bicaudal C homolog 1 (Drosophila)		PCDHB2	protocadherin beta 2		CDH13	1.44243e-06	6.2326		C4orf3	8.20931e-08	-2.19477		C20orf196	1.051e-06	2.17067		CACHD1	1.01592e-13	5.54016		CDCA4	2.93983e-15	2.07713		DZIP1	1.17417e-08	2.72446
BICD1	bicaudal D homolog 1 (Drosophila)		PDCD4	programmed cell death 4 (neoplastic tra		CDH16	4.08634e-11	-9.34662		C4orf34	2.01864e-11	-4.6059		C20orf199	5.57143e-15	2.19484		CACNB3	5.08208e-08	-2.47242		CDCA5	4.87867e-15	2.82052		Dbf4	8.12987e-05	2.21045
BID	BH3 interacting domain death agonist		PEX11G	peroxisomal biogenesis factor 11 gamma		CDK19	1.13655e-09	-2.11003		C5orf13	1.60956e-10	-6.9168		C21orf7	0.00125156	2.14671		CADM1	0.000839316	-2.90924		CDCA8	3.61597e-09	2.09061		Dbndd1	1.29249e-06	-2.38096
BIVM	basic, immunoglobulin-like variable mot		PF4V1	platelet factor 4 variant 1		CDKN2C	3.15481e-06	-2.02511		C5orf27	0.0100687	2.03584		C2orf49	1.60041e-11	2.46254		CALB1	6.98714e-05	-2.05878		CDCP1	9.10336e-11	3.08157		Ddx60	7.55248e-07	2.62569
BNIP3L	BCL2/adenovirus E1B 19kDa interacting p		PKMYT1	protein kinase, membrane associated tyr		CDKN2D	6.51275e-07	2.16122		C5orf39	2.25486e-09	-3.52146		C2orf72	3.61568e-10	3.08519		CALCOCO1	2.04977e-12	-4.45013		CDH13	4.34602e-09	13.9158		Dph3b	2.68399e-07	2.03907
BOD1L	biorientation of chromosomes in cell di		PLAT	plasminogen activator, tissue		CELSR2	2.71946e-05	-2.09679		C5orf62	1.01729e-08	-2.19666		C3	5.49409e-10	9.40145		CAND2	1.07933e-13	3.71647		CDH16	1.61097e-13	-19.805		E2F1	3.33532e-11	2.4919
BPHL	biphenyl hydrolase-like (serine hydrola		PLAUR	plasminogen activator, urokinase recept		CENPE	0.00266242	2.24582		C6orf225	8.90731e-08	-2.45869		C3orf52	4.86013e-11	3.06181		CAPS	5.94017e-06	-2.88703		CDK5RAP3	1.77405e-06	-2.07717		E2F7	7.67287e-08	2.04851
BPTF	bromodomain PHD finger transcription fa		PMEPA1	prostate transmembrane protein, androge		CENPI	1.65469e-06	2.16698		C6orf226	4.16468e-09	-3.0525		C3orf59	1.89945e-14	2.97995		CARD8	4.46979e-08	2.1323		CDKN1B	5.1797e-11	-2.04455		E2F8	7.56683e-07	2.9401
BRAF	v-raf murine sarcoma viral oncogene hom		POLR3G	polymerase (RNA) III (DNA directed) pol		CENPL	6.34604e-09	2.05758		C6orf57	1.13553e-07	-2.18355		C4orf3	1.01907e-07	-2.17171		CCDC113	5.05495e-10	-2.61091		CDKN2D	5.80406e-07	2.1741		EFEMP1	1.72745e-08	-2.59086
BRAP	BRCA1 associated protein		PSG9	pregnancy specific beta-1-glycoprotein		CFB	6.4455e-05	-4.10973		C6orf99	5.89474e-08	2.01198		C4orf34	3.74588e-09	-3.1385		CCDC125	1.07414e-11	-4.15927		CELSR2	5.95097e-08	-3.10357		EFEMP2	2.25512e-10	3.34239
BRCA1	breast cancer 1, early onset		PYROXD2	pyridine nucleotide-disulphide oxidored		CHST11	2.57034e-08	3.07142		C7orf40	3.23082e-15	4.06083		C5orf13	1.92187e-11	-8.75275		CCDC86	3.14899e-08	2.37917		CENPI	4.79676e-07	2.31847		EFNA1	1.77458e-07	-2.85092
BRD8	bromodomain containing 8		Pnpt1	polyribonucleotide nucleotidyltransfera		CLDN1	7.37334e-05	2.23571		C7orf50	1.75016e-06	-2.04156		C5orf34	2.02089e-06	2.135		CCDC88A	1.93991e-06	-2.13436		CENPL	8.94841e-11	2.50165		EID3	1.83378e-07	2.41813
BRE	brain and reproductive organ-expressed		QPCT	glutaminyl-peptide cyclotransferase		CLDN14	0.000869987	2.03509		C7orf60	8.68468e-09	-3.05474		C5orf39	1.17678e-07	-2.70038		CCDC92	6.98767e-08	-2.47586		CFB	0.00382528	-2.52077		ELFN2	6.62991e-10	-2.57312
BRIX1	brix domain containing 2		QPRT	quinolinate phosphoribosyltransferase		CLIP3	4.63631e-08	-2.03328		C7orf63	7.74072e-05	-2.47544		C5orf41	1.62864e-08	2.0987		CCL26	2.01651e-08	4.75736		CHEK1	2.61405e-09	2.16677		ELL2	1.00301e-13	-4.77605
BST2	bone marrow stromal cell antigen 2		RASSF2	Ras association (RalGDS/AF-6) domain fa		CMPK2	0.000344694	2.33745		C9orf100	6.48285e-06	2.20317		C6orf1	2.55627e-09	2.27049		CCNA1	2.46832e-09	3.9856		CHKB	8.0269e-06	-3.30685		EMR1	0.00352854	2.11105
BTBD11	BTB (POZ) domain containing 11		RBKS	ribokinase		CNOT6L	1.91982e-10	-2.23656		C9orf69	1.22539e-12	-2.0284		C6orf145	1.78578e-10	2.00776		CCNA2	4.08055e-10	2.80079		CHST11	7.7259e-09	3.33818		ENG	6.9413e-07	2.07039
BTBD2	BTB (POZ) domain containing 2		RBP7	retinol binding protein 7, cellular		CNTNAP1	3.3476e-05	2.13667		C9orf9	1.16622e-05	-2.46707		C6orf225	8.16189e-11	-3.84855		CCND1	9.44781e-15	7.38159		CKAP2L	7.86528e-09	2.29848		EPHA4	9.19888e-14	-4.60792
BTD	biotinidase		RGS2	regulator of G-protein signaling 2, 24k		COQ5	2.75369e-10	-2.14263		C9orf95	2.77779e-14	-4.1235		C6orf52	1.16495e-07	2.50601		CCRN4L	1.29395e-09	2.65044		CLDN1	6.12903e-05	2.26452		EPSTI1	2.87105e-08	3.92988
BTG3	BTG family, member 3		RPP25	ribonuclease P/MRP 25kDa subunit		CPA4	1.89017e-11	4.41309		CABLES1	2.54982e-07	2.08344		C7orf13	4.84202e-06	2.17045		CD3EAP	3.21523e-08	2.42911		CLDN2	0.0091622	2.09172		ERCC6L	7.549e-08	2.34044
BTN3A1	butyrophilin, subfamily 3, member A1		Rapgef3	Rap guanine nucleotide exchange factor		CRIP2	5.24217e-07	-2.46615		CACHD1	9.15931e-15	6.91404		C7orf40	2.12928e-18	7.46897		CD83	1.44219e-09	3.22765		CLIP3	2.25209e-08	-2.09907		ESPL1	1.83875e-08	2.39308
BTN3A2	butyrophilin, subfamily 3, member A2		Rhobtb1	Rho-related BTB domain containing 1		CRISPLD2	1.3677e-07	2.8043		CACNB3	9.31458e-07	-2.11824		C7orf60	1.13507e-05	-2.00579		CD9	8.03982e-14	6.41616		CLTCL1	3.75134e-09	-2.83646		ETV2	1.11522e-07	-2.20016
BUB1	budding uninhibited by benzimidazoles 1		Rnase4	ribonuclease, RNase A family, 4		CROT	4.442e-09	-2.13747		CADM1	0.000277831	-3.30282		C7orf63	4.23242e-05	-2.59562		CD97	1.36632e-09	3.26018		CMPK2	1.37519e-11	13.6316		EYA4	2.24401e-13	-2.68907
Bat2l2	BAT2 domain containing 1		Rnft2	ring finger protein, transmembrane 2		CRYL1	2.20996e-08	-3.4914		CALB1	1.02287e-06	-2.70137		C8orf4	0.00390996	3.40433		CD99L2	3.18645e-11	-2.02304		CMTM7	4.89261e-13	2.2343		Echdc2	0.000122039	-2.04794
Baz2b	bromodomain adjacent to zinc finger dom		SCN2A	sodium channel, voltage-gated, type II,		CRYZL1	2.06766e-12	-2.41001		CALCOCO1	3.36849e-13	-5.15094		C9orf109	5.21754e-08	2.46101		CDC25A	1.87386e-16	4.92601		CNIH3	0.00378532	2.19139		Egr1	0.00068654	-2.3702
Bbs1	Bardet-Biedl syndrome 1		SERPINB5	serpin peptidase inhibitor, clade B (ov		CTGF	0.00272671	2.64348		CALD1	2.71121e-08	-2.35289		C9orf150	2.54182e-10	3.03444		CDC42BPB	2.69767e-09	-2.01558		COL18A1	6.68448e-08	-3.21291		Enc1	4.01489e-10	2.81436
Bcl2l12	BCL2-like 12 (proline rich)		SFN	stratifin		CTNNBIP1	8.19841e-08	-2.38915		CAND2	1.53485e-18	9.82018		C9orf91	2.33142e-17	4.13227		CDCA4	1.57133e-15	2.12588		COL1A2	0.000670075	-4.66174		Exo1	5.6481e-13	2.74765
Blm	Bloom syndrome, RecQ helicase-like		SGSH	N-sulfoglucosamine sulfohydrolase		CTPS	1.21128e-10	2.21057		CARD8	6.71504e-10	2.63188		CA13	7.37406e-10	2.33487		CDCA5	6.11167e-16	3.15822		CPA4	2.01496e-10	3.69171		F12	2.57391e-07	2.08483
Bmf	Bcl2 modifying factor		SH3BGRL	SH3 domain binding glutamic acid-rich p		CTSL2	1.82352e-09	2.50982		CBY1	6.18972e-13	-2.63619		CABLES1	2.51515e-10	3.02035		CDCA8	1.57139e-09	2.16745		CRIP2	2.90894e-08	-2.9558		FAM40B	0.000178612	2.74415
Bnc2	basonuclin 2		SHF	Src homology 2 domain containing F		CTXN1	1.17628e-11	-2.70317		CCDC113	2.03964e-11	-3.13678		CACHD1	8.57776e-15	6.9583		CDCP1	2.11847e-12	3.95373		CRISPLD2	3.94659e-07	2.61979		FAM89B	4.50495e-08	-2.0391
Bri3	brain protein I3		SLC10A4	solute carrier family 10 (sodium/bile a		CXCL2	0.0140454	2.28772		CCDC125	1.07798e-10	-3.52279		CACNB3	5.40341e-07	-2.17819		CDH13	7.5372e-09	12.8041		CRYAB	1.98508e-06	-3.1471		FANCE	3.90129e-11	2.04009
Brwd3	bromodomain and WD repeat domain contai		SLC27A1	solute carrier family 27 (fatty acid tr		CXXC5	5.92434e-05	-2.03471		CCDC28A	1.82661e-06	-2.22285		CADM1	0.00240634	-2.57557		CDK19	4.60799e-10	-2.19352		CRYL1	3.46278e-08	-3.37624		FANK1	5.82488e-11	-5.19342
Btn3a3	butyrophilin, subfamily 3, member A3		SLC2A10	solute carrier family 2 (facilitated gl		CYFIP2	1.25331e-07	-2.05834		CCDC86	1.78744e-08	2.45191		CALB1	8.10846e-07	-2.74425		CDK5RAP3	2.18646e-06	-2.05526		CTGF	0.0163673	2.11089		FBXO32	5.54799e-05	-2.03109
Bves	blood vessel epicardial substance		SLCO4A1	solute carrier organic anion transporte		CYP27C1	3.88202e-07	-2.68712		CCDC92	2.75715e-10	-3.49546		CALCOCO1	4.79912e-10	-3.04497		CELSR2	2.53228e-10	-4.73605		CTNNBIP1	7.24499e-08	-2.40528		FBXO43	1.00161e-05	2.62781
C10orf114	chromosome 10 open reading frame 114		SSBP2	single-stranded DNA binding protein 2		CYP2U1	1.2758e-08	-2.19158		CCL26	1.1868e-06	3.32888		CALD1	5.56751e-09	-2.55992		CENPE	0.00502968	-2.10478		CTXN1	2.80889e-10	-2.31079		FEN1	7.39066e-12	2.15254
C10orf116	chromosome 10 open reading frame 116		STAMBPL1	STAM binding protein-like 1		Camk1d	1.60718e-07	-2.14024		CCNA1	3.84438e-12	7.1554		CAMK2D	3.21964e-08	2.05942		CENPF	2.26452e-05	-2.44448		CUL7	2.11835e-10	-2.14476		FGF5	3.22387e-05	-3.48529
C10orf47	chromosome 10 open reading frame 47		STEAP1	six transmembrane epithelial antigen of		Cblb	3.04051e-11	-2.74741		CCNA2	3.76544e-10	2.81373		CAMK2G	2.07797e-09	-2.61228		CENPI	3.83467e-07	2.34758		CXCL2	0.000815187	3.34085		FHDC1	8.29619e-06	-2.17893
C10orf78	chromosome 10 open reading frame 78		SULF2	sulfatase 2		Cd55	5.53162e-10	2.19985		CCND1	3.77114e-14	6.45089		CAMTA1	1.92463e-06	2.1496		CENPL	4.90214e-12	2.91789		CXXC5	1.87153e-05	-2.18195		FIGNL1	1.74888e-11	2.35959
C10orf88	chromosome 10 open reading frame 88		SUSD1	sushi domain containing 1		Cdc45	1.14992e-08	2.4675		CCRN4L	7.76695e-11	3.12402		CAND2	1.87288e-15	5.00357		CHD6	1.80659e-08	-2.35179		CYHR1	1.41374e-07	-2.02877		FKBP7	2.09719e-07	-2.60583
C11orf24	chromosome 11 open reading frame 24		Ska1	chromosome 18 open reading frame 24		Cdca2	1.32289e-07	2.00301		CCT6B	2.61598e-08	-2.65377		CAPRIN2	5.59413e-07	-2.25453		CHEK1	3.23704e-09	2.14638		CYP1B1	2.21869e-10	3.30365		FLJ27352	1.12671e-05	-2.19868
C11orf49	chromosome 11 open reading frame 49		Slc3a1	solute carrier family 3 (cystine, dibas		Cep110	3.59484e-05	2.01505		CD302	1.63419e-08	-2.29223		CARD10	1.83027e-10	-2.29556		CHKB	7.92055e-05	-2.70614		CYP27C1	4.15076e-09	-3.69055		FLRT2	4.50083e-07	-3.07305
C11orf52	chromosome 11 open reading frame 52		Snx29	sorting nexin 29		Ces2	3.03112e-13	-2.5221		CD3EAP	4.46953e-09	2.71231		CASP6	1.69449e-07	-2.36436		CHST11	1.87102e-08	3.13866		Camk1d	1.26723e-07	-2.16511		FMNL1	9.697e-10	2.02147
C11orf70	chromosome 11 open reading frame 70		Sorcs2	sortilin-related VPS10 domain containin		Chac2	1.6384e-07	3.61968		CD83	1.66342e-10	3.75002		CBY1	7.66781e-11	-2.12016		CKAP2L	6.68942e-08	2.07813		Cblb	2.85423e-12	-3.14402		FNDC1	6.23563e-06	-2.7491
C11orf80	chromosome 11 open reading frame 80		Sox4	SRY (sex determining region Y)-box 4		Cnrip1	0.00560867	2.1621		CD9	3.29036e-14	6.9936		CCDC125	7.45313e-09	-2.69551		CLCN6	5.3369e-07	-2.26895		Ccdc80	1.53859e-10	-4.06253		FOLR1	1.99399e-05	-2.76267
C11orf82	chromosome 11 open reading frame 82		Sycp3	synaptonemal complex protein 3		Cobll1	1.55735e-10	-2.21875		CD97	7.47296e-11	4.00792		CCDC14	3.88107e-06	-2.07853		CLDN1	3.65827e-07	3.29129		Ccnl2	0.000104185	-2.44391		FOSL1	4.2826e-06	3.49886
C12orf5	chromosome 12 open reading frame 5		Syt7	synaptotagmin XVII		Col6a3	1.31507e-07	6.90685		CD99L2	1.25407e-15	-3.27469		CCDC68	1.13994e-05	2.00416		CLDN14	0.00020154	2.27658		Cdc45	1.54421e-07	2.16039		FOXO4	1.49211e-05	-2.11852
C12orf57	chromosome 12 open reading frame 57		TAF4B	TAF4b RNA polymerase II, TATA box bindi		Cpt1c	8.14054e-10	4.32837		CDC25A	1.64112e-16	4.97789		CCDC92	6.17e-07	-2.19943		CLIP2	2.30348e-11	-2.59343		Cdca2	7.90972e-08	2.04919		Fam105a	2.3685e-09	2.33525
C13orf27	chromosome 13 open reading frame 27		TINAGL1	tubulointerstitial nephritis antigen-li		Cyp24a1	5.20515e-08	8.65756		CDCA4	1.41499e-15	2.13428		CCL26	1.43225e-08	4.91327		CLIP3	4.06851e-11	-2.88673		Cdkl3	6.35222e-08	-2.15382		Fam131b	6.58297e-06	-2.1946
C14orf159	chromosome 14 open reading frame 159		TMEM101	transmembrane protein 101		DCDC2	6.20804e-05	-2.97531		CDCA5	4.89802e-16	3.19857		CCNA1	5.77593e-18	47.4951		CLK2	1.80077e-05	-2.32007		Cdt1	3.97084e-09	2.50542		Fancd2	4.3269e-06	2.10232
C14orf182	chromosome 14 open reading frame 182		TMEM194A	transmembrane protein 194A		DDX11	7.2359e-06	2.0821		CDCA8	2.4049e-11	2.64754		CCNB1	3.26257e-06	-2.29267		CLTCL1	6.05667e-10	-3.17865		Cenpq	1.35172e-09	2.29829		Fbn2	5.40871e-08	5.19077
C14orf28	chromosome 14 open reading frame 28		TMEM47	transmembrane protein 47		DDX21	1.59532e-10	2.4062		CDCP1	1.37975e-10	3.00477		CCND1	1.38165e-14	7.10746		CMPK2	8.17168e-12	14.6649		Ces2	1.55119e-16	-3.87084		Fbxo5	1.14583e-07	2.13219
C14orf37	chromosome 14 open reading frame 37		TNS3	tensin 3		DECR1	8.01858e-09	-2.12769		CDH13	3.5472e-08	10.2192		CCNG2	3.24926e-05	-2.00537		CMTM7	6.6241e-12	2.01753		Chac2	2.89487e-06	2.88902		Frmd4a	1.33869e-10	2.74066
C14orf45	chromosome 14 open reading frame 45		TPD52L1	tumor protein D52-like 1		DGKI	5.401e-06	-3.8572		CDK19	1.10371e-11	-2.61639		CCRN4L	1.38429e-10	3.01565		CNIH3	0.000141188	3.05877		Chsy3	2.38569e-07	3.02427		GAA	2.93451e-07	-2.20318
C15orf39	chromosome 15 open reading frame 39		TRPS1	trichorhinophalangeal syndrome I		DIAPH2	9.58788e-17	-4.13934		CDK5RAP3	1.81885e-06	-2.07454		CD109	4.64566e-06	-2.2631		COL18A1	5.52372e-11	-5.77903		Cnpy4	6.23959e-10	-2.14768		GADD45A	2.80495e-05	2.31973
C16orf58	chromosome 16 open reading frame 58		TSPAN1	tetraspanin 1		DNAJB13	1.6177e-09	-5.5188		CDKN1B	4.5311e-12	-2.25738		CD302	2.41598e-08	-2.24853		COL1A1	0.000223818	-2.02587		Cnrip1	0.000902292	2.6255		GALNT3	1.50965e-07	2.67288
C16orf7	chromosome 16 open reading frame 7		Tmem170b	transmembrane protein 170B		DNAJC25	1.04273e-10	2.35494		CDKN2AIP	6.58089e-10	2.49282		CD3EAP	2.99314e-07	2.16316		COL1A2	1.77893e-06	-12.482		Cobll1	4.93017e-14	-3.37384		GCH1	8.27466e-10	2.76629
C16orf73	chromosome 16 open reading frame 73		URB2	URB2 ribosome biogenesis 2 homolog (S.		DNAL4	1.12558e-08	-3.16347		CDKN2C	2.59265e-06	-2.04528		CD9	5.59481e-15	8.38487		COL7A1	0.000476631	-2.24921		Col5a1	1.47808e-06	-3.0733		GCNT1	3.7217e-11	-2.77892
C16orf75	chromosome 16 open reading frame 75		Uchl1	ubiquitin carboxyl-terminal esterase L1		DPYD	2.17381e-09	-3.63208		CDKN2D	4.45509e-08	2.49599		CD97	5.19999e-06	2.01713		CPA4	3.45558e-08	2.64081		Col6a3	7.92735e-10	13.6929		GDA	1.82236e-06	4.0902
C17orf100	chromosome 17 open reading frame 100		XAF1	XIAP associated factor 1		DSCC1	5.53129e-14	2.61764		CDS1	6.75332e-08	-2.39682		CD99L2	1.64593e-12	-2.2795		CRADD	7.72629e-09	2.10401		Cpt1c	5.17535e-08	3.15361		GINS2	1.04282e-08	2.03233
C17orf103	chromosome 17 open reading frame 103		ZNF323	zinc finger protein 323		DUSP4	3.13578e-10	4.05373		CELSR2	7.4511e-10	-4.32559		CDC25A	1.03463e-14	3.69074		CRIP2	7.70646e-09	-3.23211		Cyp24a1	1.08775e-07	7.85921		GJA1	0.000334308	-2.40787
C17orf51	chromosome 17 open reading frame 51		ZNF788	zinc finger family member 788		DYNC2LI1	1.51774e-08	-2.08067		CENPI	2.08081e-07	2.43001		CDC34	1.8099e-09	2.17327		CRISPLD2	6.97417e-07	2.52799		Cytsb	4.81844e-09	-2.0704		GLIPR2	7.76331e-07	-2.0521
C17orf53	chromosome 17 open reading frame 53		ZNF850P	zinc finger protein 850 pseudogene		DZIP1	1.21983e-08	2.7183		CENPK	0.000203377	2.06322		CDCP1	2.01399e-12	3.96811		CRNDE	0.000460105	-2.03168		DCDC2	3.35874e-05	-3.15018		GLRX	3.06316e-09	-2.85566
C17orf61	chromosome 17 open reading frame 61		aifm2	apoptosis-inducing factor, mitochondrio		Dbndd1	6.34919e-08	-2.87265		CENPL	1.56237e-12	3.11693		CDH13	3.5909e-10	20.7539		CRYAB	2.95785e-08	-4.50635		DCLK1	0.000191882	3.38564		GLS	1.38815e-09	-2.25306
C17orf85	chromosome 17 open reading frame 85		akr1c2	aldo-keto reductase family 1, member C2		Dcaf15	1.89807e-11	2.24162		CEP290	1.96401e-06	-2.06		CDK19	5.9414e-10	-2.16938		CRYL1	1.76872e-07	-3.00174		DCLRE1B	2.66453e-07	2.10816		GLT8D2	1.53056e-08	-3.6062
C17orf97	chromosome 17 open reading frame 97		cdc6	cell division cycle 6 homolog (S. cerev		Depdc1	3.11859e-06	2.08551		CFB	0.000196861	-3.59574		CDKN1A	1.49274e-08	3.15387		CTNNBIP1	2.29813e-07	-2.26116		DDX21	1.23749e-09	2.18887		GPR126	4.63606e-09	2.63227
C18orf54	chromosome 18 open reading frame 54		crip1	cysteine-rich protein 1 (intestinal)		Dmrt3	2.58404e-06	-2.15054		CHD6	2.24067e-08	-2.32609		CDKN2AIP	8.42057e-12	3.18152		CTPS	7.85054e-11	2.25286		DDX58	2.15134e-08	4.20888		GPR56	3.06646e-10	-3.6348
C18orf8	chromosome 18 open reading frame 8		dhrs1	dehydrogenase/reductase (SDR family) me		E2F1	2.35067e-11	2.53533		CHEK1	3.24281e-10	2.38635		CDV3	2.32282e-09	2.29251		CUL7	2.89836e-11	-2.33974		DDX60L	3.74717e-06	2.05486		GPRC5C	2.19795e-13	-4.71673
C19orf18	chromosome 19 open reading frame 18		dusp5	dual specificity phosphatase 5		E2F8	1.71932e-05	2.36549		CHKB	0.00197515	-2.05506		CEBPB	4.71612e-13	2.94536		CUX1	2.40084e-09	-2.14652		DHX32	5.35977e-10	-2.41421		GSDMB	0.00300516	-2.0005
C19orf21	chromosome 19 open reading frame 21		dusp6	dual specificity phosphatase 6		EBF4	0.00012039	-2.01872		CHMP2A	5.69774e-08	-2.3285		CEBPG	3.48867e-15	3.87933		CXCL2	3.12047e-05	5.10513		DIXDC1	1.25645e-07	-2.12441		GSTT1	2.91221e-06	-2.40088
C19orf48	chromosome 19 open reading frame 48		fam172a	family with sequence similarity 172, me		EBP	5.99632e-19	7.53826		CHST11	2.75373e-09	3.59623		CECR1	3.34637e-06	2.63796		CXXC5	2.62679e-08	-3.38028		DNAL4	5.59321e-07	-2.46521		GTSE1	3.06283e-12	2.02949
C1GALT1	core 1 synthase, glycoprotein-N-acetylg		fam54a	family with sequence similarity 54, mem		EFCAB7	8.02322e-09	-2.31755		CKAP2L	1.47956e-07	2.00558		CELSR2	6.09978e-10	-4.39763		CYFIP2	1.36735e-07	-2.05019		DPYD	1.19382e-05	-2.09383		Gins1	7.57576e-12	2.30741
C1RL	complement component 1, r subcomponent-		hyi	hydroxypyruvate isomerase homolog (E. c		EFEMP2	7.27174e-11	3.60987		CLCN6	8.32841e-07	-2.21509		CENPC1	2.18852e-06	-2.9915		CYP1B1	2.00804e-12	4.64999		DSCC1	1.99747e-14	2.75428		Gins4	7.70003e-07	2.15245
C1orf112	chromosome 1 open reading frame 112		kiaa1370	KIAA1370		EFHD1	2.15698e-05	2.5013		CLDN23	9.31819e-07	2.02186		CENPE	0.00334629	-2.19434		CYP27C1	8.04426e-10	-4.19519		DUSP3	5.22078e-09	2.03039		Gpc2	0.000109045	2.62233
C1orf124	chromosome 1 open reading frame 124		lat	linker for activation of T cells		EFNA4	6.09697e-07	-2.01297		CLIP3	3.99158e-10	-2.54909		CENPF	8.3932e-07	-3.11479		Camk1d	3.05544e-09	-2.62869		DUSP4	3.50128e-10	4.01932		Grb14	0.00175472	-2.19827
C1orf135	chromosome 1 open reading frame 135		lbh	limb bud and heart development homolog		EID3	2.71508e-11	4.34582		CLTCL1	2.08532e-08	-2.56589		CEP120	6.66254e-13	2.6517		Cblb	1.82302e-11	-2.82549		DYNC2LI1	1.34215e-08	-2.0919		Gsn	3.31414e-08	-2.26862
C1orf163	chromosome 1 open reading frame 163		2010-03-03	membrane-associated ring finger (C3HC4)		EIF2C2	9.79465e-11	2.13043		CMPK2	1.04329e-11	14.1677		CEP152	3.87103e-05	-2.68413		Cbs	1.73327e-06	-2.24247		DZIP1	1.39909e-08	2.69632		H19	8.2745e-08	12.786
C1orf186	chromosome 1 open reading frame 186		mest	mesoderm specific transcript homolog (m		ELFN2	3.45397e-10	-2.66472		CMTM4	5.29459e-13	-2.19799		CEP290	5.25983e-08	-2.49808		Ccdc80	1.33927e-13	-7.62653		Dars2	9.66327e-12	2.02732		H1f0	9.70175e-15	3.55118
C1orf213	chromosome 1 open reading frame 213		micB	MHC class I polypeptide-related sequenc		ELL2	1.1034e-12	-3.98425		CNOT6L	9.27723e-11	-2.31079		CETN2	5.27761e-10	-2.75496		Ccnl2	4.97906e-05	-2.59113		Dbf4	0.000137678	2.13207		HAUS8	2.98734e-12	2.45481
C1orf57	chromosome 1 open reading frame 57		mx1	myxovirus (influenza virus) resistance		ELOVL6	6.08494e-11	2.90266		COL18A1	2.66705e-08	-3.43742		CFB	0.000521545	3.20218		Cd70	5.74133e-06	-2.2163		Dbndd1	6.40471e-07	-2.48365		HBEGF	1.14181e-06	3.68357
C1orf63	chromosome 1 open reading frame 63		nat14	N-acetyltransferase 14 (GCN5-related, p		EML1	1.85473e-06	-2.11251		COL1A2	1.34075e-05	-8.82985		CHKA	2.73193e-08	2.2385		Cdc45	3.50681e-08	2.32725		Ddx60	2.10138e-08	3.3574		HCFC1R1	7.74733e-06	-2.34488
C1ql1	complement component 1, q subcomponent-		nupr1	nuclear protein, transcriptional regula		ENDOD1	2.0654e-08	2.28975		COQ10B	2.80998e-09	2.00863		CHKB	8.39272e-05	-2.6927		Cdca2	8.41708e-08	2.04351		Dmrt3	1.68008e-07	-2.50811		HGSNAT	4.22932e-08	-2.06006
C1r	complement component 1, r subcomponent		oscp1	organic solute carrier partner 1		ENG	6.21751e-07	2.08155		CPA4	1.1365e-10	3.84858		CHST11	1.11711e-06	2.41484		Cdkl3	1.99368e-07	-2.04199		Dph3b	8.33784e-10	2.73739		HIST1H2BD	6.76617e-06	-2.13115
C20orf196	chromosome 20 open reading frame 196		palm	paralemmin		EPHA2	2.98457e-05	2.20332		CRADD	1.2568e-10	2.55676		CLDN1	1.20269e-09	5.38074		Cdt1	5.18415e-09	2.47031		E2F1	9.13986e-12	2.65982		HMGA1	2.35447e-08	2.60521
C20orf199	chromosome 20 open reading frame 199		phlda1	pleckstrin homology-like domain, family		EPHA4	2.40244e-13	-4.28307		CREB3L4	2.22203e-07	-2.0395		CLDN14	8.04387e-07	3.54269		Cenpq	2.09585e-09	2.25159		E2F7	1.30211e-09	2.49142		HOOK2	1.13259e-05	-2.10244
C20orf96	chromosome 20 open reading frame 96		plekha7	pleckstrin homology domain containing,		ERCC6L	1.58795e-07	2.25123		CRELD1	1.12088e-06	-2.0424		CLDN23	1.39112e-08	2.505		Ces2	2.48046e-17	-4.39844		E2F8	3.84728e-06	2.62		HPGD	1.20142e-05	-3.62986
C21orf119	chromosome 21 open reading frame 119		prss23	protease, serine, 23		ERI3	1.24435e-06	-2.01032		CRIP2	3.27201e-09	-3.43188		CLK2	5.42613e-07	-2.94978		Chac2	5.71048e-07	3.27411		EBF4	1.68075e-05	-2.28765		HSD17B6	4.98505e-14	-7.69086
C21orf45	chromosome 21 open reading frame 45		prss3	protease, serine, 3		ESPL1	3.88435e-08	2.30247		CRISPLD2	1.21905e-07	2.82549		CLYBL	0.000134207	-2.15386		Chsy3	5.46801e-09	4.03037		EFEMP2	1.48821e-11	4.04631		HSF2BP	1.08798e-11	-5.21468
C21orf7	chromosome 21 open reading frame 7		rab40b	RAB40B, member RAS oncogene family		ETV2	9.22666e-10	-2.8512		CRNDE	0.000213743	-2.14623		CMPK2	7.55307e-12	14.8299		Cnpy4	1.0782e-12	-2.93098		EFHC1	9.09394e-09	-2.85026		HTRA1	1.61085e-06	-3.29825
C2orf49	chromosome 2 open reading frame 49		rph3al	rabphilin 3A-like (without C2 domains)		EYA4	2.21094e-16	-4.05679		CRYAB	1.67656e-10	-7.58489		CMTM7	4.25357e-13	2.24733		Cnrip1	0.000110617	3.27051		EFNA1	5.30858e-08	-3.09561		Hapln4	1.87476e-05	2.17783
C2orf63	chromosome 2 open reading frame 63		rrs1	RRS1 ribosome biogenesis regulator homo		Echdc2	0.000111066	-2.06035		CRYL1	3.94472e-09	-3.99134		CNIH3	6.54739e-05	3.30698		Cobll1	1.117e-15	-4.352		EFNA4	5.163e-07	-2.02868		Hells	9.78764e-10	3.51578
C2orf72	chromosome 2 open reading frame 72		rtn2	reticulon 2		Eml2	3.04292e-07	2.01613		CRYZL1	4.06519e-12	-2.33746		CNN2	1.21014e-12	-2.00366		Col17a1	1.08272e-06	2.58197		EID3	1.95461e-07	2.40944		Hexim2	3.38566e-07	-2.01996
C2orf81	chromosome 2 open reading frame 81		runx3	runt-related transcription factor 3		Enc1	3.8625e-11	3.2412		CTGF	0.00553791	2.42272		CNTNAP1	2.3713e-05	2.1828		Col5a1	7.82761e-09	-4.77638		ELFN2	7.40893e-11	-2.90491		Hist1h1a	0.000459203	2.28204
C3	complement component 3		tbc1d19	TBC1 domain family, member 19		Ept1	7.41991e-08	2.06851		CTHRC1	0.000188154	-2.2941		COL18A1	3.7975e-11	-5.98962		Col6a3	1.44383e-09	12.5501		ELL2	5.73554e-14	-4.99625		Hjurp	4.88219e-11	2.17743
C3orf52	chromosome 3 open reading frame 52		tgfbi	transforming growth factor, beta-induce		Exo1	1.45107e-11	2.34629		CTNNBIP1	1.26548e-08	-2.65315		COL1A1	2.74076e-05	-2.33249		Cps1	2.36486e-05	-2.14282		ELOVL6	7.03451e-10	2.53785		IFI27	2.20121e-15	23.6759
C3orf59	chromosome 3 open reading frame 59		tspan15	tetraspanin 15		F12	1.54217e-08	2.39823		CTPS	1.85528e-10	2.17047		COL1A2	1.16481e-08	-32.411		Cpt1c	4.43427e-07	2.72343		EMR1	2.78173e-05	3.35847		IFI44	1.03108e-09	5.99274
C4orf3	chromosome 4 open reading frame 3		upp1	uridine phosphorylase 1		FAM126A	8.73368e-08	2.26426		CUL7	2.11841e-11	-2.37362		COL7A1	8.90563e-05	-2.58206		Ctso	2.51507e-06	-2.8668		ENG	4.67947e-09	2.69704		IFI6	6.13652e-07	5.66237
C4orf34	chromosome 4 open reading frame 34		ypel3	yippee-like 3 (Drosophila)		FAM40B	0.000209602	2.70356		CXCL2	0.000109997	4.32894		COQ10B	5.0356e-10	2.15707		Cxcl3	0.000615972	4.19078		ENGASE	6.06443e-06	-2.26341		IFIH1	1.52424e-06	3.76847
C4orf47	chromosome 4 open reading frame 47					FAM49A	0.00192445	2.1009		CXXC5	9.93875e-10	-4.36714		CORT	1.40907e-09	-2.03768		Cyp24a1	5.00981e-07	6.4778		EPHA4	4.62226e-15	-5.91004		IFIT1	2.32938e-06	3.86225
C5ar1	complement component 5a receptor 1					FAM59B	1.34628e-07	2.66131		CYFIP2	1.46691e-07	-2.04366		CP110	3.77226e-07	-2.27298		Cytsb	1.32013e-09	-2.18997		EPSTI1	1.19922e-10	6.50543		IFT140	2.62105e-08	-3.98759
C5orf13	chromosome 5 open reading frame 13					FAM89B	1.39124e-09	-2.39733		CYP27C1	5.5114e-10	-4.32601		CPEB3	3.3657e-09	2.79137		D2hgdh	1.30331e-07	-2.37415		ERCC6L	9.5654e-09	2.62118		IGDCC4	2.76073e-06	2.2169
C5orf27	chromosome 5 open reading frame 27					FANCA	5.68989e-07	2.20824		CYP2U1	3.83304e-09	-2.32084		CREB5	0.00096217	2.22701		DACT1	0.000323024	2.30953		ESCO2	5.7115e-09	2.4535		IL32	4.9671e-10	6.63348
C5orf34	chromosome 5 open reading frame 34					FANCE	3.1865e-14	2.80599		Camk1d	2.07174e-08	-2.37169		CRIP2	7.25816e-09	-3.2455		DCDC2	2.04703e-10	-11.9485		ETV2	8.98632e-08	-2.22395		IL6	3.23461e-06	8.75507
C5orf39	chromosome 5 open reading frame 39					FANK1	9.68014e-11	-4.96603		Cblb	6.08871e-13	-3.45987		CRISPLD1	1.25102e-05	-2.10562		DCLK1	0.00820037	2.20193		EVL	1.08222e-09	-2.17608		INHBE	0.00113256	2.06457
C5orf41	chromosome 5 open reading frame 41					FBLN2	6.88876e-06	2.36251		Cbs	1.99006e-09	-3.42495		CRYAB	4.86861e-11	-8.73291		DCLRE1B	5.23479e-08	2.28518		EYA4	5.62378e-14	-2.89072		IRAK2	2.11058e-06	2.23667
C5orf53	chromosome 5 open reading frame 53					FBRSL1	4.29725e-06	-2.10261		Ccdc80	2.54813e-11	-4.68844		CSGALNACT1	2.18553e-05	2.00222		DCUN1D3	6.4379e-07	2.01585		Echdc2	5.03287e-07	-2.96325		IRF9	7.19949e-08	2.91599
C5orf62	MSTP150					FBXO43	4.39019e-07	3.33261		Ccnl2	0.000634156	-2.12077		CSRNP2	4.9501e-13	2.24849		DDX21	1.08092e-10	2.45206		Efhd2	1.43185e-07	2.30598		IRS1	1.26729e-06	2.25262
C6orf1	chromosome 6 open reading frame 1					FEN1	4.25195e-11	2.01048		Cd55	5.56309e-10	2.1993		CTH	1.52766e-16	7.06618		DDX58	7.10414e-08	3.80388		Enc1	3.32139e-12	3.81681		ISG15	3.56237e-08	5.20565
C6orf105	chromosome 6 open reading frame 105					FIGNL1	6.45836e-12	2.47201		Cd70	1.80518e-07	-2.73925		CTNNBIP1	3.78874e-07	-2.20299		DDX60L	1.30137e-06	2.17225		Epas1	1.44973e-10	2.00372		ITPR1	1.16184e-08	2.17126
C6orf145	chromosome 6 open reading frame 145					FKBP7	5.78208e-07	-2.45065		Cdc45	3.45082e-07	2.07801		CTNS	1.24863e-12	3.63968		DHX32	4.87579e-09	-2.17547		Evi2a	0.00625197	2.54161		IVNS1ABP	1.3468e-15	-2.9612
C6orf225	chromosome 6 open reading frame 225					FLJ27352	3.6235e-07	-2.72639		Cdca2	3.5305e-09	2.37322		CUL7	6.41127e-10	-2.04938		DHX33	4.05317e-12	2.02252		Exo1	6.67801e-14	3.08778		Ifit2	1.87049e-09	4.44245
C6orf226	chromosome 6 open reading frame 226					FLJ45513	3.33747e-05	2.54367		Cdkl3	9.5828e-10	-2.67023		CXCL2	1.64246e-06	7.62001		DIAPH2	9.2568e-13	-2.44764		F12	5.4584e-09	2.53446		Ifit3	5.69003e-07	5.21757
C6orf52	chromosome 6 open reading frame 52					FMNL1	6.074e-11	2.27068		Cdt1	1.01229e-08	2.3858		CXXC5	5.29798e-09	-3.8164		DIXDC1	1.15393e-07	-2.13305		FADS2	2.59641e-06	-2.29222		Ifitm1	3.14456e-08	8.98747
C6orf57	chromosome 6 open reading frame 57					FOSL1	4.28199e-06	3.4989		Cenpq	3.96978e-09	2.18659		CYP1B1	3.22108e-13	5.41668		DNAL4	5.32487e-07	-2.47249		FAM113B	1.30053e-06	-2.00747		Ifne	0.00011761	-2.68002
C6orf99	similar to Putative uncharacterized pro					FOXO4	1.30517e-09	-3.94418		Ces2	3.25809e-17	-4.31264		CYP27C1	9.90546e-11	-5.00278		DNMT3B	3.95947e-08	-2.3162		FAM78A	6.23689e-05	-2.21822		Igfn1	0.000142816	2.16465
C7orf13	chromosome 7 open reading frame 13					FOXS1	2.54399e-07	-2.20624		Chac2	1.02305e-09	5.70428		CYP51A1	1.16464e-05	-2.36747		DOCK1	4.12208e-08	-2.0235		FAM89B	6.23921e-08	-2.01045		Impa2	5.47616e-06	-2.03276
C7orf29	chromosome 7 open reading frame 29					FTH1	1.2722e-10	-3.35546		Chsy3	8.74424e-05	2.04685		Camk1d	1.66789e-09	-2.71987		DPYD	5.78556e-06	-2.18195		FAM8A1	6.40159e-10	-2.25602		Ing4	5.00284e-09	-2.53888
C7orf40	chromosome 7 open reading frame 40					FZD2	1.87763e-08	-2.06883		Cnpy4	2.50619e-14	-3.68184		Camta2	3.54597e-16	5.99013		DSCC1	5.75628e-15	2.94041		FANCE	5.95379e-12	2.19902		JUP	1.9684e-06	-2.53414
C7orf50	chromosome 7 open reading frame 50					Fam105a	5.90638e-11	2.83273		Cnrip1	0.000372681	2.87988		Card6	7.726e-08	-3.29799		DST	3.85243e-07	-2.44806		FANK1	2.09785e-13	-9.14563		KBTBD3	3.36387e-07	-2.24965
C7orf60	chromosome 7 open reading frame 60					Fam117a	5.11107e-09	-2.92433		Cobll1	6.28753e-15	-3.85389		Cblb	4.83485e-09	-2.14305		DUSP3	4.76498e-11	2.51114		FEN1	6.55827e-13	2.38682		KDM5B	2.67486e-13	-2.51341
C7orf63	chromosome 7 open reading frame 63					Fbn2	3.54895e-05	2.85049		Col17a1	9.59823e-08	3.03728		Cbs	4.18381e-08	2.79693		DUSP4	2.93766e-13	7.58728		FHDC1	7.26382e-09	-3.43207		KIAA0182	1.1632e-08	-2.18817
C8orf4	chromosome 8 open reading frame 4					G0s2	0.000559646	-2.2532		Col5a1	3.71114e-08	-4.15634		Ccdc80	1.85135e-17	-23.6868		DVL3	4.33838e-08	-2.09578		FIGNL1	2.02796e-13	2.95392		KIAA1462	5.43387e-08	-3.02092
C9orf100	chromosome 9 open reading frame 100					GAA	5.42805e-07	-2.1354		Col6a3	2.78499e-08	8.39182		Ccnl2	6.55622e-07	-3.71351		DYNC2LI1	2.32073e-10	-2.53582		FKBP7	2.71229e-07	-2.56511		KIF12	2.76555e-07	-2.2069
C9orf109	chromosome 9 open reading frame 109					GADD45A	1.21641e-06	2.88906		Cps1	3.51073e-05	-2.09224		Cd55	1.4937e-15	4.65572		DZIP1	5.22047e-07	2.20518		FLJ27352	1.0572e-05	-2.20711		KIF15	0.000235448	2.04151
C9orf150	chromosome 9 open reading frame 150					GAN	2.54508e-06	2.0284		Cpt1c	2.56946e-08	3.31566		Cd70	1.21701e-06	-2.43106		DZIP1L	1.88119e-05	-2.18923		FOLR1	2.30178e-08	-4.98791		KIF23	1.66291e-06	2.05
C9orf46	chromosome 9 open reading frame 46					GCH1	1.43848e-11	3.55864		Crat	3.70866e-05	-2.24865		Celsr3	1.54047e-06	-2.24973		Dars2	1.21893e-12	2.19836		FOSL1	9.91009e-08	5.01441		KIFC1	1.08469e-09	2.06142
C9orf69	chromosome 9 open reading frame 69					GCNT1	6.774e-10	-2.391		Cxcl3	0.00940577	2.76852		Cenpq	3.09919e-11	2.78562		Dbndd1	3.27936e-09	-3.52287		FOXO4	1.87938e-06	-2.3962		KIT	0.000339873	-2.26606
C9orf9	chromosome 9 open reading frame 9					GGPS1	1.61423e-10	-2.17131		Cyp24a1	1.40515e-08	10.3446		Cep70	3.86811e-08	-2.21429		Dclk2	5.30861e-06	-2.49361		FUK	1.79789e-05	-2.19466		KLHL24	8.22781e-09	-2.93267
C9orf91	chromosome 9 open reading frame 91					GLIPR2	8.20893e-08	-2.29626		Cytsb	1.87838e-09	-2.15614		Ces2	1.37531e-19	-6.74126		Ddx60	3.34272e-07	2.77		FUT4	3.63971e-09	2.31388		KNTC1	2.38763e-05	2.09945
C9orf95	chromosome 9 open reading frame 95					GLT8D2	5.14214e-05	-2.08109		D2hgdh	4.52051e-07	-2.22099		Chac2	5.61594e-07	3.27843		Dmrt3	6.62253e-09	-3.06425		Faah	4.30494e-05	-2.01377		KRT81	3.10806e-07	2.14648
CA13	carbonic anhydrase XIII					GMPR2	3.33749e-10	-2.05849		DCAF6	1.96389e-09	-2.04317		Cmbl	2.79203e-08	-2.13832		Dopey2	1.37733e-10	-2.12752		Fam105a	2.67122e-11	2.96436		Kif20b	5.24501e-05	2.39856
CABLES1	Cdk5 and Abl enzyme substrate 1					GPR126	3.37389e-09	2.68002		DCDC2	5.60609e-09	-7.8235		Cnnm4	1.20615e-07	2.25113		Dph3b	4.54474e-11	3.26011		Fam113a	5.83347e-05	-2.04251		Klf4	1.6723e-07	2.8761
CACHD1	cache domain containing 1					GPR3	6.09938e-07	2.68262		DCLRE1B	1.95825e-08	2.4045		Cnpy4	3.10089e-16	-5.06931		Dyx1c1	1.49392e-07	-2.39735		Fam117a	2.36243e-08	-2.66461		Krt7	3.88542e-06	-3.11534
CACNA2D3	calcium channel, voltage-dependent, alp					GPR56	7.60444e-11	-4.02691		DDAH1	1.23876e-10	2.05809		Cnrip1	0.000475515	2.80748		E2F1	1.67489e-11	2.57875		Fam167a	1.73264e-06	2.9686		LACTB2	9.02152e-06	-2.00324
CACNB3	calcium channel, voltage-dependent, bet					GPRC5C	4.92217e-08	-2.19667		DDX21	2.21715e-11	2.65639		Cobll1	9.88887e-14	-3.23422		E2F7	1.4309e-10	2.80736		Fam83h	3.58489e-10	-2.3005		LAMC2	0.00013577	2.50174
CADM1	cell adhesion molecule 1					GRAMD4	3.16481e-09	-2.26034		DDX58	1.40499e-08	4.36804		Col5a1	2.52965e-07	-3.53624		E2F8	0.000134127	2.06494		Fancd2	6.87062e-06	2.05089		LIF	6.50617e-05	2.33366
CALB1	calbindin 1, 28kDa					GRAMD4	5.0225e-08	-2.13319		DDX60L	3.50259e-07	2.33264		Col6a3	3.64778e-09	11.011		EBF4	3.93221e-05	-2.16648		Fbn2	1.32087e-07	4.74737		LIMA1	9.98806e-12	2.51331
CALCOCO1	calcium binding and coiled-coil domain					GSDMB	0.000810743	-2.2429		DECR1	1.66941e-09	-2.28592		Coq4	5.34798e-08	-2.02868		EEA1	2.0838e-07	-2.29074		Fbxo5	1.38605e-07	2.11298		LIN9	1.50195e-11	2.69499
CALD1	caldesmon 1					GSTO2	9.49928e-13	3.13352		DECR2	9.48715e-07	2.10764		Cps1	3.13757e-08	-3.31656		EFCAB7	8.26104e-08	-2.07497		Fgfrl1	4.88605e-10	-2.10339		LOC100132308	5.47183e-06	-2.29516
CAMK2D	calcium/calmodulin-dependent protein ki					GSTT1	1.69895e-07	-2.88627		DGAT1	2.17085e-08	-2.17032		Cpsf6	1.30295e-13	-2.70515		EFEMP2	1.28791e-11	4.09017		Frmd4a	3.86205e-09	2.30416		LOC158376	4.12416e-05	2.14814
CAMK2G	calcium/calmodulin-dependent protein ki					GULP1	6.99432e-10	-2.54333		DGKI	1.36039e-09	-9.78154		Cpt1c	6.09308e-09	3.69001		EFHC1	1.04008e-08	-2.82678		GAA	2.27914e-09	-2.88811		LOC375190	1.22402e-08	-3.60731
CAMTA1	calmodulin binding transcription activa					Gmds	6.83749e-08	-2.10064		DHCR7	4.99997e-10	-2.63157		Crem	5.86779e-09	2.16472		EFNA1	7.75252e-07	-2.58885		GABARAPL1	4.61028e-09	-2.11788		LOC389458	1.30189e-05	-2.05523
CAND2	cullin-associated and neddylation-disso					Golph3l	1.5193e-13	-3.505		DHTKD1	1.59564e-08	-2.07098		Cxcl3	5.29662e-06	8.6251		EFNA4	1.68761e-07	-2.13972		GABBR1	2.59605e-06	-3.4794		LOC442075	0.000359536	2.16496
CAPN1	calpain 1, (mu/I) large subunit					Gpr160	1.60903e-07	-2.13141		DHX32	2.51493e-11	-2.83376		Cyp24a1	2.23694e-07	7.16551		EHBP1	7.86365e-13	-2.11551		GADD45A	3.00838e-08	3.83955		LOC550643	6.95982e-07	-2.33402
CAPRIN2	caprin family member 2					Gprc5a	1.57844e-14	2.99142		DHX33	3.5029e-12	2.0335		Cytsb	1.22233e-10	-2.44679		EID3	1.13167e-06	2.18818		GALNS	2.88003e-07	-2.04736		LOC653877	2.54133e-07	2.06209
CAPS	calcyphosine					Gsn	3.15111e-09	-2.56383		DIAPH2	2.65798e-14	-2.92486		DACT1	1.40285e-07	4.52094		ELFN2	6.79916e-14	-4.65225		GALNT12	8.85651e-05	2.0058		LOC729013	1.85276e-07	-2.35572
CARD10	caspase recruitment domain family, memb					H19	1.52806e-07	11.6094		DIXDC1	4.41341e-11	-3.29515		DCAF6	1.23633e-11	-2.56942		ELL2	5.82271e-14	-4.9901		GALNT3	8.86477e-11	4.55305		LOC729859	1.7855e-09	-2.93435
CARD8	caspase recruitment domain family, memb					HAS3	3.08086e-07	2.57192		DNA2	2.45027e-06	2.06354		DCAF8	5.03953e-09	-2.00461		ELOVL6	3.83755e-09	2.32925		GCC2	4.56372e-07	-2.53025		LPHN2	5.91221e-09	-2.1781
CASC5	cancer susceptibility candidate 5					HAUS8	7.60476e-13	2.62291		DNAL4	2.93658e-09	-3.47516		DCDC2	1.38898e-11	-17.6144		EMR1	2.29457e-05	3.42215		GCH1	1.89908e-12	4.10455		LRIG3	1.08538e-07	-3.32097
CASP6	caspase 6, apoptosis-related cysteine p					HBEGF	5.13867e-11	10.6475		DNASE2	4.62392e-08	-2.14264		DCUN1D3	1.69507e-07	2.14855		ENG	1.09282e-10	3.40509		GCNT1	6.04214e-12	-3.08289		LRRC17	0.000160932	-3.94343
CBLN2	cerebellin 2 precursor					HBP1	1.50479e-10	-2.47344		DNMBP	4.80885e-09	2.37971		DDIT3	3.43842e-13	5.03643		EPB41L1	5.76389e-06	-2.15925		GDA	4.91013e-07	4.66277		LRRC27	1.12385e-07	-2.69503
CBY1	chibby homolog 1 (Drosophila)					HCFC1R1	1.24361e-08	-3.67136		DPYD	1.8448e-07	-2.68341		DDX21	7.05297e-12	2.82419		EPS8L2	3.81416e-07	-2.34504		GINS2	3.10024e-10	2.37937		LRRC37A3	5.5666e-05	-2.13151
CCDC113	coiled-coil domain containing 113					HCG4	6.95327e-07	-2.92738		DSCC1	6.36942e-15	2.92441		DDX58	2.15652e-07	3.47481		EPSTI1	6.62417e-10	5.49482		GJA1	0.000324137	-2.41427		LYAR	1.46015e-08	2.39379
CCDC125	coiled-coil domain containing 125					HDAC4	1.79195e-12	-3.37275		DUSP1	1.09455e-08	2.26439		DDX60L	2.62916e-06	2.09311		ERCC5	2.9727e-08	-2.1835		GLIPR2	2.75764e-07	-2.15907		LYPD1	4.00232e-06	2.41749
CCDC14	coiled-coil domain containing 14					HGSNAT	2.68388e-09	-2.34184		DUSP4	2.49598e-14	9.94843		DECR1	2.10822e-08	-2.03984		ERCC6L	2.62804e-08	2.47732		GLRX	6.80976e-08	-2.39179		LYRM5	8.33794e-09	-2.07627
CCDC28A	coiled-coil domain containing 28A					HHLA3	4.31695e-05	-2.19018		DYNC2LI1	2.43482e-11	-2.86228		DECR2	9.13002e-07	2.11173		ERMAP	8.59543e-09	-2.08294		GLS	1.21951e-09	-2.26659		Lrrn4	7.7923e-10	3.58268
CCDC68	coiled-coil domain containing 68					HIST1H2AL	3.30597e-10	3.67319		DZIP1	5.69679e-08	2.48678		DENND2A	3.39985e-07	-2.42381		ESCO2	5.27227e-09	2.46382		GLT8D2	1.31594e-08	-3.64825		Ly6e	2.31059e-07	3.68743
CCDC86	coiled-coil domain containing 86					HIST1H2BG	1.58598e-05	2.45348		Dbf4	1.49468e-05	2.48671		DEPDC1B	3.3526e-05	-2.29998		ETV2	2.00547e-09	-2.72533		GOLGA2	1.62515e-08	-2.12426		MAGEB2	2.50859e-07	6.97206
CCDC88A	coiled-coil domain containing 88A					HIST1H2BG	8.75742e-05	2.02828		Dbndd1	1.34327e-08	-3.18826		DEPDC7	2.94551e-09	-2.57242		ETV5	3.96912e-08	2.2462		GOLGA8A	3.3604e-05	-4.70605		MAGEH1	0.000265781	-2.05623
CCDC92	coiled-coil domain containing 92					HIST1H2BK	7.14005e-09	3.15876		Dclk2	9.35107e-06	-2.40152		DFFB	1.89599e-08	-2.13225		EVL	6.84721e-11	-2.47363		GOLGB1	1.73417e-09	-3.49362		MAGI2	8.89509e-07	-2.17565
CCL26	chemokine (C-C motif) ligand 26					HMGA1	6.46903e-10	3.25237		Ddx60	7.56218e-07	2.62547		DGKI	1.00134e-09	-10.1795		EYA4	3.23367e-13	-2.64014		GPR124	2.96228e-06	-2.20739		MAL	1.89114e-06	-4.50177
CCNA1	cyclin A1					HNF1B	8.46752e-06	-2.43477		Depdc1	1.00927e-06	2.21455		DHCR24	1.56339e-18	-5.48768		EZH1	8.77898e-08	-2.06111		GPR126	2.83532e-08	2.38528		MAL2	2.3028e-09	-5.0557
CCNA2	cyclin A2					HOOK2	1.6745e-05	-2.05658		Dfna5	6.46878e-09	-2.22692		DHCR7	2.50606e-12	-3.62082		Echdc2	2.67786e-08	-3.69606		GPR3	1.22624e-05	2.21906		MASTL	2.86136e-07	2.51589
CCNB1	cyclin B1					HOXA13	0.000592016	-2.32373		Dhrs2	4.80197e-05	2.24835		DHX32	1.48863e-11	-2.91875		Efhd2	3.04789e-07	2.21654		GPR56	8.2345e-13	-5.86906		MATN3	7.85873e-06	2.11319
CCND1	cyclin D1					HOXB8	3.80002e-07	-2.09091		Dmrt3	2.65163e-11	-4.58783		DHX40	1.64743e-11	-2.20289		Eif4g3	2.95228e-11	-2.40493		GPRC5C	9.64674e-13	-4.20949		MBD5	1.03921e-08	-2.45737
CCNG2	cyclin G2					HOXD9	3.18244e-05	-2.04832		Dph3b	2.45167e-11	3.39254		DIXDC1	3.64718e-11	-3.33593		Eif5a2	8.13559e-06	2.17004		GRAMD4	2.67388e-09	-2.27838		MCM3	8.94314e-14	2.07187
CCRN4L	CCR4 carbon catabolite repression 4-lik					HSD17B11	1.07334e-06	2.08035		Dyx1c1	2.84382e-07	-2.314		DKC1	3.35981e-09	2.06325		Eif5b	9.09473e-10	-2.31472		GRAMD4	1.83542e-08	-2.23749		MCM4	4.09911e-10	2.20756
CCT6B	chaperonin containing TCP1, subunit 6B					HSD17B6	9.17257e-08	-2.51755		E2F1	2.98009e-11	2.50573		DLGAP5	2.45698e-05	-2.13524		En2	0.000161204	2.25205		GRB10	4.71476e-08	2.16333		MCM6	3.85681e-09	2.05414
CD109	CD109 molecule					HSF2BP	3.7793e-08	-2.83852		E2F7	1.03846e-10	2.859		DNAL4	1.15061e-05	-2.07127		Enc1	5.0837e-13	4.37796		GSDMB	1.213e-08	-6.41155		MCM8	6.17779e-08	2.02765
CD302	CD302 molecule					HTRA1	1.25696e-05	-2.79479		E2F8	2.50105e-05	2.30685		DNM1	2.94965e-06	-2.12701		Epas1	1.74877e-12	2.40965		GSTO2	8.98388e-10	2.20392		MED24	7.50565e-10	2.07345
CD3EAP	CD3e molecule, epsilon associated prote					Hapln4	5.56445e-10	4.56957		EBF4	4.95793e-07	-2.89872		DOCK11	5.58502e-13	3.55221		Erbb2	9.14434e-08	-2.58046		GSTT1	2.79251e-07	-2.79167		MEGF9	3.29654e-14	-3.20599
CD83	CD83 molecule					Hells	7.65176e-07	2.31107		EBP	2.01664e-15	3.87709		DPCD	1.24182e-11	-2.97099		Exo1	2.90454e-14	3.24151		GTSE1	6.70916e-13	2.15098		MEIS1	4.0716e-08	-2.45535
CD9	CD9 molecule					Hist1h1c	2.56305e-06	2.50802		EFCAB7	1.70647e-09	-2.50739		DPP3	3.51078e-10	-2.10451		F12	2.29253e-10	3.04262		Gabre	5.49884e-05	-3.45957		MFAP3L	4.62187e-08	-2.56848
CD97	CD97 molecule					Hist1h2bh	2.79204e-07	2.76059		EFEMP2	7.76165e-10	3.08491		DPYD	2.33858e-08	-3.07094		FADS2	1.37548e-07	-2.74349		Gins1	2.51291e-11	2.19131		MFAP5	1.34964e-08	-2.83847
CD99L2	CD99 molecule-like 2					Hjurp	3.56917e-11	2.20644		EFHC1	9.09214e-10	-3.30654		DST	9.75511e-06	-2.04186		FAM113B	2.90036e-07	-2.16028		Gins4	2.62502e-07	2.27724		MGC4294	2.25197e-05	-2.13326
CDC25A	cell division cycle 25 homolog A (S. po					Hspbap1	7.75718e-09	2.54266		EFHD1	0.000296978	2.07474		DUSP1	9.99377e-10	2.55597		FAM114A1	4.19744e-06	-2.13495		Glis2	6.96424e-08	-2.1486		MITF	4.0377e-09	-2.34233
CDC34	cell division cycle 34 homolog (S. cere					Htr2b	0.00053078	2.792		EFNA1	2.47031e-06	-2.40667		DUSP3	3.59629e-12	2.87557		FAM126A	1.60004e-07	2.196		Gpn3	4.2313e-09	2.04079		MKX	3.42218e-06	2.03144
CDC42BPB	CDC42 binding protein kinase beta (DMPK					IFI27	1.38946e-10	5.95884		EFNA4	1.14604e-10	-3.20506		DUSP4	6.94375e-12	5.57974		FAM8A1	1.05453e-09	-2.20578		Grb14	9.88688e-06	-3.55915		MMP13	7.16713e-08	-7.03683
CDC7	cell division cycle 7 homolog (S. cerev					IFI44	7.0516e-05	2.3441		EID3	1.53179e-09	3.24334		DYNC2LI1	4.06318e-11	-2.78185		FANCE	3.83816e-12	2.23985		Gsn	5.57737e-10	-2.82547		MOSPD3	1.14517e-06	-2.08828
CDCA4	cell division cycle associated 4					IFI6	0.00509967	2.1624		EIF2AK2	1.51447e-05	2.06375		DYSF	9.91783e-06	2.23726		FANK1	5.81996e-14	-10.6204		H19	3.71904e-08	14.5445		MPV17L	3.89718e-06	2.09061
CDCA5	cell division cycle associated 5					IFT52	5.7907e-10	-2.00332		EIF2C2	5.82252e-12	2.41		Dbndd1	2.56381e-08	-3.0508		FARS2	1.32014e-06	2.04593		H1f0	2.86403e-16	4.52881		MRAP2	2.57262e-05	-2.67035
CDCA8	cell division cycle associated 8					IFT74	3.09259e-10	-2.40723		EIF5	2.81413e-12	2.0702		Dclk2	6.93539e-09	-4.06945		FARSB	2.15743e-09	2.04525		HAS3	1.25673e-05	2.0712		MT1F	2.05822e-12	5.20356
CDCP1	CUB domain containing protein 1					IGDCC4	1.08758e-08	3.11447		ELFN2	3.38094e-13	-4.12226		Ddx60	1.00504e-09	4.24348		FBRSL1	3.5547e-07	-2.41537		HAUS2	2.02831e-09	2.24084		MUC1	7.70021e-08	-3.06298
CDH13	cadherin 13, H-cadherin (heart)					IGFBP5	1.9118e-11	-4.36735		ELL2	5.9053e-13	-4.16945		Dhrs2	2.38357e-06	2.76979		FEN1	2.32954e-13	2.50311		HAUS8	1.57743e-12	2.53065		MVP	2.19735e-11	-2.34338
CDH16	cadherin 16, KSP-cadherin					IL32	6.0886e-12	11.032		ELOVL6	2.36684e-11	3.06835		Dph3b	5.98032e-10	2.78975		FHDC1	2.43681e-09	-3.72028		HBEGF	1.35192e-09	7.20159		MYL5	3.8684e-07	-2.42575
CDK19	cell division cycle 2-like 6 (CDK8-like					IL6	2.1131e-08	20.2787		EML1	1.99821e-06	-2.10433		Dyx1c1	7.89697e-09	-2.8463		FIGNL1	3.46401e-14	3.27084		HBP1	1.41579e-09	-2.22392		Mcm10	8.35994e-12	2.81399
CDK5RAP3	CDK5 regulatory subunit associated prot					IL8	0.0067461	3.39004		EMR1	0.000192851	2.78787		E2F7	2.10668e-10	2.74715		FKBP7	1.97587e-08	-3.03072		HCFC1R1	6.08813e-06	-2.38121		Mcm5	5.82886e-09	2.24602
CDKN1A	cyclin-dependent kinase inhibitor 1A (p					IMMP2L	3.67967e-07	-2.18138		ENDOD1	2.64155e-07	2.0277		EFEMP1	2.7294e-08	-2.52475		FNBP4	1.8395e-05	-2.04965		HGSNAT	7.37255e-10	-2.49855		Melk	6.75733e-10	2.00969
CDKN1B	cyclin-dependent kinase inhibitor 1B (p					INADL	5.94151e-07	-2.18559		ENG	1.1483e-09	2.931		EFEMP2	6.15205e-12	4.32637		FOLR1	2.63106e-11	-10.5387		HMGA1	1.85234e-11	4.18594		Mmp1	0.00379015	-9.8454
CDKN2AIP	CDKN2A interacting protein					INHBA	0.0041673	2.22211		ENGASE	3.67514e-05	-2.03473		EFHC1	2.13454e-10	-3.65602		FOSL1	2.05394e-07	4.66219		HMGA2	4.38344e-09	3.26632		NCAPH	1.5154e-09	2.37288
CDKN2C	cyclin-dependent kinase inhibitor 2C (p					INPP5F	9.63245e-11	3.20525		EPHA2	1.32979e-05	2.3208		EFHD1	9.51021e-06	2.65564		FOXO4	3.31386e-09	-3.67309		HMGCS1	2.66139e-10	-2.35768		NFE2L3	6.17128e-07	2.67395
CDKN2D	cyclin-dependent kinase inhibitor 2D (p					IPPK	1.76053e-09	2.01802		EPHA4	3.50366e-16	-7.53861		EFNA1	4.68324e-07	-2.67432		FUK	3.30158e-05	-2.11453		HNF1B	0.000105372	-2.06544		NID2	2.06901e-06	2.81173
CDS1	CDP-diacylglycerol synthase (phosphatid					IRAK2	1.59382e-05	2.00093		EPS8L2	2.04214e-07	-2.42911		EFNA4	1.66943e-10	-3.12993		FUT4	6.1765e-10	2.52928		HOOK2	2.79938e-09	-3.57214		NIPAL3	1.74165e-12	-3.06113
CDV3	CDV3 homolog (mouse)					ISG15	9.65463e-06	3.10435		EPSTI1	5.09957e-09	4.55605		EHBP1	4.12876e-13	-2.16976		FXYD2	2.46085e-05	-2.14613		HPGD	3.06378e-08	-6.86575		NIPSNAP1	4.83161e-07	-2.10136
CEBPB	CCAAT/enhancer binding protein (C/EBP),					ITGB2	8.80965e-09	3.23794		ERCC6L	5.27286e-08	2.38557		EIF4EBP1	1.61256e-11	4.4814		FZD2	1.13495e-09	-2.35331		HSD17B11	1.40026e-06	2.05303		NOC3L	1.34922e-08	2.11609
CEBPG	CCAAT/enhancer binding protein (C/EBP),					ITPR1	8.41181e-15	5.2205		ERMAP	1.36004e-10	-2.52906		ELFN2	3.71584e-16	-7.35856		Fam105a	2.13876e-12	3.46153		HSD17B6	1.35317e-13	-6.95166		NPNT	0.000145529	-2.19091
CECR1	cat eye syndrome chromosome region, can					ITPRIP	1.47915e-06	2.29726		ERRFI1	2.16094e-11	2.22376		ELL2	1.66236e-14	-5.54367		Fam113a	5.83657e-05	-2.04245		HSF2BP	1.2849e-11	-5.13954		NUAK2	9.27787e-07	2.24052
CELSR2	cadherin, EGF LAG seven-pass G-type rec					IVNS1ABP	4.75316e-16	-3.13688		ESCO2	1.52341e-08	2.33274		ELOVL6	2.74786e-09	2.36788		Fam117a	7.14939e-10	-3.32227		HTRA1	2.17499e-08	-4.82315		NUDT15	2.50952e-10	2.18223
CENPC1	centromere protein C 1					Ifit2	4.89968e-06	2.47263		ETS1	0.00013251	2.03734		EMG1	1.3665e-08	2.08883		Fam131b	3.31535e-06	-2.28467		Hapln4	1.02336e-07	3.05736		NUF2	1.7964e-08	2.27196
CENPE	centromere protein E, 312kDa					Ifit3	0.00525269	2.07124		ETV2	1.84848e-08	-2.41208		EMR1	0.00104656	2.37328		Fam167a	2.92498e-07	3.40768		Hcn3	3.19137e-05	-2.56773		Nap1l3	0.0100498	-2.17874
CENPF	centromere protein F, 350/400ka (mitosi					Ifitm1	1.42813e-06	5.5691		ETV5	8.25347e-08	2.16729		ENGASE	5.87321e-07	-2.61595		Fam83h	5.21022e-09	-2.04555		Hells	2.69894e-09	3.27632		Neil3	1.95842e-08	2.22329
CENPI	centromere protein I					Impa2	2.48082e-09	-3.18736		EVL	5.24843e-10	-2.24739		ENOSF1	2.48257e-07	-2.55879		Fbn2	7.01638e-06	3.28123		Hexim2	3.13386e-08	-2.26262		Nicn1	4.20428e-07	-2.33753
CENPK	centromere protein K					Ing4	2.38821e-10	-3.02424		EYA4	2.87602e-17	-4.70381		EPM2AIP1	3.26596e-09	-2.13346		Fbxo45	2.68303e-10	2.04371		Hist1h1a	5.15072e-06	3.34134		Nmu	1.05818e-09	3.50701
CENPL	centromere protein L					KCTD21	1.94484e-08	-2.06482		EZH1	9.54923e-09	-2.28743		EPS8L2	1.06238e-07	-2.52217		Fbxo5	1.19144e-07	2.12823		Hist1h1d	6.42115e-05	2.01114		Nptx2	2.23783e-06	5.08548
CEP120	centrosomal protein 120kDa					KDM5B	1.55317e-11	-2.10775		Echdc2	2.87442e-09	-4.44176		EPSTI1	1.38361e-10	6.41128		Frmd4a	3.99267e-08	2.06793		Hspg2	0.000133313	-2.09558		OLFML3	1.1599e-05	-3.52878
CEP152	centrosomal protein 152kDa					KIAA1467	1.97439e-07	2.05462		Efhd2	1.27181e-07	2.32054		ERAP1	6.06901e-06	2.01893		GAA	5.97593e-09	-2.7267		Htr2b	0.00282884	2.33871		ORC6L	6.41764e-09	2.35219
CEP290	centrosomal protein 290kDa					KIF12	2.09065e-10	-3.35555		En2	0.000427824	2.09486		ERCC5	1.80757e-09	-2.51056		GABBR1	1.62806e-06	-3.62651		IFFO2	6.54639e-08	2.07369		OSBPL3	5.96311e-12	2.40843
CEP72	centrosomal protein 72kDa					KLHDC3	1.15267e-08	-2.04155		Enah	4.86706e-11	-2.90129		ERMAP	5.75493e-10	-2.35546		GADD45A	8.86589e-09	4.25153		IFI27	2.84854e-16	33.2056		Oas3	1.58644e-11	5.35903
CETN2	centrin, EF-hand protein, 2					KLHDC9	0.000106182	-2.50718		Enc1	5.62363e-13	4.34454		ERRFI1	1.32661e-11	2.27105		GALNS	5.59254e-08	-2.21396		IFI35	8.42431e-06	2.61629		Odz2	0.0144982	-2.0945
CFB	complement factor B					KNTC1	2.71182e-06	2.39412		Erbb2	3.73078e-06	-2.09595		ETV5	8.11277e-10	2.76175		GALNT3	5.71146e-12	5.78433		IFI44	1.1866e-10	7.52873		Orc1l	2.27761e-10	2.27919
CHD6	chromodomain helicase DNA binding prote					KRCC1	2.27207e-09	-2.32064		Ets2	6.17104e-11	2.17333		EVL	1.2985e-13	-3.51823		GAN	1.28549e-07	2.37012		IFI6	1.62688e-09	12.0767		P2ry6	5.43276e-07	-2.03686
CHEK1	CHK1 checkpoint homolog (S. pombe)					KRT81	1.77983e-13	5.52805		Exo1	5.15516e-13	2.76079		Echdc2	1.0863e-07	-3.31727		GATA6	0.000308413	2.04192		IFIH1	5.06191e-09	6.682		P4ha3	6.71275e-07	-3.42856
CHKA	choline kinase alpha					KRT86	2.43517e-07	3.06752		F11r	1.69026e-10	-2.25169		Eif1	1.65777e-13	2.24735		GBP2	0.0002078	-2.26708		IFIT1	2.47119e-09	7.98046		PADI2	1.20295e-07	2.38
CHKB	carnitine palmitoyltransferase 1B (musc					Kctd18	1.01557e-06	-2.29535		F12	1.1979e-09	2.75827		Eif5a2	4.85223e-08	2.9832		GBP3	3.46864e-05	2.02923		IFT172	5.06429e-08	-2.48201		PAQR7	2.13588e-12	2.15919
CHMP2A	chromatin modifying protein 2A					Klf4	8.24803e-08	3.01794		FADS2	2.88905e-07	-2.61782		En2	8.64655e-10	6.38669		GCC2	2.64313e-10	-4.25518		IFT74	1.93785e-09	-2.20869		PCDHB10	6.72049e-09	-4.40664
CHST11	carbohydrate (chondroitin 4) sulfotrans					Klhl35	3.97124e-06	2.4579		FAM113B	3.90186e-07	-2.12863		Enah	6.30202e-08	-2.02678		GCH1	2.08735e-13	4.86776		IL32	3.14078e-12	12.0099		PCDHB14	9.80947e-05	-2.02405
CKAP2L	cytoskeleton associated protein 2-like					LACTB2	1.18716e-06	-2.23306		FAM114A1	2.26728e-06	-2.20892		Enc1	4.53925e-12	3.73462		GCLM	1.1037e-06	2.23764		IL6	3.32703e-08	18.6915		PCDHB15	0.000376149	-2.1325
CLCN6	chloride channel 6					LAMC2	9.9568e-05	2.56684		FAM126A	8.59011e-08	2.26618		Epas1	4.21822e-18	5.37324		GCNT1	5.8942e-14	-4.17867		INADL	1.56853e-08	-2.67097		PCDHB2	0.000390415	-2.28067
CLDN1	claudin 1					LCAT	0.000785413	2.12562		FAM134B	5.07495e-07	2.18497		Erbb2	7.76613e-08	-2.60565		GDA	2.68235e-08	6.35723		INHBA	0.00191783	2.4126		PDCD4	8.26222e-10	-2.65361
CLDN14	claudin 14					LIF	1.06941e-05	2.66348		FAM49A	0.001902	2.10309		Ets2	7.65533e-13	2.66117		GGPS1	1.05806e-09	-2.01044		INSIG1	2.21173e-06	-2.08644		PDSS1	1.26287e-05	2.5443
CLDN2	claudin 2					LIN9	5.25054e-10	2.26385		FAM89B	1.21527e-10	-2.7219		Extl2	1.28187e-14	-3.54663		GINS2	2.82098e-09	2.14976		INSR	4.71561e-05	-2.04326		PEG10	5.24228e-18	9.12264
CLDN23	claudin 23					LNPEP	1.10508e-05	2.34303		FAM8A1	2.01031e-10	-2.38119		F12	2.3249e-11	3.52469		GIP	4.87885e-09	-2.71719		IRAK2	5.18067e-08	2.78952		PEX11G	7.3078e-06	-2.29262
CLIP2	CAP-GLY domain containing linker protei					LOC100128288	1.69258e-06	-3.15038		FANCE	4.49659e-14	2.75639		FADS2	1.43934e-07	-2.73554		GLIPR1	0.000156051	2.3429		IRF7	1.03489e-06	2.8424		PF4V1	1.46219e-12	-8.68524
CLIP3	CAP-GLY domain containing linker protei					LOC100130776	5.41898e-06	-2.06042		FANK1	7.6412e-14	-10.2812		FAM113B	1.54293e-08	-2.51974		GLIPR2	5.49195e-08	-2.34495		IRF9	2.67334e-09	3.67801		PIGZ	1.60826e-07	-3.36522
CLK2	CDC-like kinase 2					LOC100132308	9.80803e-06	-2.21552		FBXW9	3.80781e-07	-2.00736		FAM114A1	3.70674e-07	-2.44974		GLT8D2	3.94955e-07	-2.84968		ISG15	9.03473e-11	10.2028		PKIA	0.00413818	-2.07728
CLTCL1	clathrin, heavy chain-like 1					LOC158376	1.37318e-09	4.53344		FEN1	2.0732e-11	2.06638		FAM126A	5.19482e-08	2.32567		GOLGA2	1.50996e-10	-2.67438		ITFG3	9.9281e-07	-2.03101		PKMYT1	3.51061e-09	2.27164
CLYBL	citrate lyase beta like					LOC220077	1.4004e-11	2.31473		FGFBP1	3.35662e-07	-2.88147		FAM127A	4.95096e-10	-2.90169		GOLGA8A	5.73819e-06	-5.9021		ITPR1	6.82845e-11	2.81822		PLAC8	5.95501e-08	-2.1556
CMPK2	cytidine monophosphate (UMP-CMP) kinase					LOC375190	2.59417e-09	-4.07364		FHDC1	9.42326e-09	-3.36836		FAM129A	3.40328e-07	2.71311		GOLGB1	1.63809e-12	-6.1985		ITPRIP	6.08615e-06	2.12114		PLAT	2.82239e-06	3.17327
CMTM4	CKLF-like MARVEL transmembrane domain c					LOC388796	1.34482e-10	2.59292		FIGNL1	1.2488e-13	3.03528		FAM134B	1.63217e-07	2.31943		GPR124	4.85604e-08	-2.82257		IVNS1ABP	2.10505e-17	-3.79276		PLAUR	6.85965e-05	2.10501
CMTM7	CKLF-like MARVEL transmembrane domain c					LOC390940	2.4267e-06	3.04073		FKBP1A	1.7987e-05	2.1976		FAM169A	3.77026e-09	2.17799		GPR3	1.99536e-07	2.89078		Ifit2	5.11669e-12	7.82845		PLK4	1.87797e-08	2.29407
CNIH3	cornichon homolog 3 (Drosophila)					LOC401321	1.15359e-06	-2.22668		FKBP7	1.82596e-10	-4.26133		FAM24B	4.00773e-10	3.3753		GPR68	1.4169e-08	2.17117		Ifit3	3.95515e-10	12.9006		PMEPA1	6.47909e-06	-2.09035
CNN2	calponin 2					LOC440311	2.54419e-06	-2.30167		FLJ20021	3.75338e-09	-2.26344		FAM49A	2.88635e-06	3.75803		GPRC5C	4.20815e-11	-3.24712		Ifitm1	4.20166e-10	16.7687		PNRC1	1.12781e-07	-2.74663
CNOT6L	CCR4-NOT transcription complex, subunit					LOC442075	0.000156976	2.30594		FLJ27352	5.32559e-08	-3.10389		FAM54B	1.59861e-08	-2.16262		GRAMD4	1.01789e-10	-2.95137		Ifrd2	8.93081e-13	2.23503		POLD4	2.24956e-08	-2.128
CNTNAP1	contactin associated protein 1					LOC550643	2.19708e-12	-5.7978		FMNL1	3.24566e-11	2.33554		FAM59B	2.4174e-08	2.96931		GRB10	3.09588e-09	2.47717		Impa2	9.70887e-09	-2.9175		POLE2	4.52762e-15	2.39374
COL18A1	collagen, type XVIII, alpha 1					LOC642132	0.000353944	-2.17899		FNDC1	1.32801e-05	-2.59946		FAM64A	9.89833e-12	-3.21502		GRWD1	8.55227e-08	2.13047		Irf1	7.11908e-09	2.44372		POLQ	2.36089e-07	2.44412
COL1A1	collagen, type I, alpha 1					LOC642587	9.5671e-06	-4.61732		FOLR1	5.39391e-08	-4.59862		FAM89B	4.85467e-09	-2.25644		GSDMB	2.94193e-09	-7.52652		KBTBD3	1.28803e-08	-2.69888		POLR3G	1.38232e-07	2.25848
COL1A2	collagen, type I, alpha 2					LOC643988	8.34341e-08	-2.58206		FOSL1	4.70191e-07	4.30047		FAM8A1	8.47815e-11	-2.48314		GSTO2	1.17633e-10	2.42169		KDM5B	1.68096e-15	-3.28871		PPIL5	1.5856e-09	2.00243
COL7A1	collagen, type VII, alpha 1					LOC645638	1.45517e-06	-4.04112		FOXQ1	6.92222e-08	2.25958		FANCE	6.50725e-13	2.42158		GSTT1	1.94565e-08	-3.35964		KIAA0182	1.79693e-11	-3.07829		PPM1N	4.36494e-07	-2.2869
COQ10B	coenzyme Q10 homolog B (S. cerevisiae)					LOC728485	1.35775e-10	2.13822		FTH1	1.42671e-10	-3.33018		FANK1	1.4164e-15	-17.2486		GTSE1	2.27678e-12	2.05206		KIAA0895L	4.32587e-05	-2.25963		PRDM1	7.77054e-06	-2.49395
COQ5	coenzyme Q5 homolog, methyltransferase					LOC729013	1.69428e-09	-3.11423		FUK	1.55686e-07	-2.99062		FBXO3	7.26864e-12	-3.27675		Gabre	6.70225e-05	-3.38886		KIAA1462	2.12568e-05	-2.08123		PSG4	7.27968e-05	2.26646
CORT	apoptosis-inducing, TAF9-like domain 1					LOC729162	3.26504e-08	2.57727		FUT4	7.41101e-10	2.50555		FBXO43	9.01811e-05	-2.24464		Gins4	5.60584e-07	2.18812		KIF12	9.75652e-10	-3.03766		PSG9	8.13824e-13	5.53788
CP110	CP110 protein					LOC729859	5.01806e-08	-2.4203		FZD2	3.8043e-11	-2.8061		FBXO9	1.26838e-14	-2.74895		Glis2	8.49547e-10	-2.69488		KIFC2	8.48411e-07	-3.3423		PSTK	3.68917e-08	2.09987
CPA4	carboxypeptidase A4					LOC732419	7.71433e-08	2.1381		Fam105a	5.86199e-12	3.2472		FBXW9	6.0253e-11	-3.20439		Golga1	3.7722e-09	-2.33931		KLHDC9	0.000107603	-2.50447		PTGES	7.65541e-11	2.75483
CPEB3	cytoplasmic polyadenylation element bin					LOC90462	2.25097e-07	-2.00285		Fam113a	4.62403e-06	-2.38821		FDPS	7.37535e-14	-2.73092		Golph3l	2.53956e-09	-2.10515		KRT81	3.47576e-11	3.66057		PXDN	7.46721e-07	-2.56048
CRADD	CASP2 and RIPK1 domain containing adapt					LPHN2	3.80081e-10	-2.48422		Fam117a	2.36947e-09	-3.07034		FGF2	4.00831e-07	2.87766		Gpn3	6.77806e-10	2.20737		KRT86	2.8476e-06	2.58391		PYROXD2	4.50046e-06	-2.67438
CREB3L4	cAMP responsive element binding protein					LRIG3	1.81305e-07	-3.19584		Fam131b	2.97171e-05	-2.01306		FGF5	2.8524e-06	-4.48243		Gprc5a	8.05434e-12	2.21434		Kctd13	6.78131e-08	-2.27519		Phf15	2.18345e-09	2.01988
CREB5	cAMP responsive element binding protein					LRRC27	1.52581e-10	-4.29073		Fam167a	2.56852e-05	2.43654		FIGNL1	9.36381e-11	2.19098		Grb14	6.5973e-06	-3.70074		Klf4	1.53051e-09	4.05328		Pigw	1.23369e-05	2.60719
CRELD1	cysteine-rich with EGF-like domains 1					LRRN1	2.23711e-12	-7.56778		Fbn1	6.19843e-07	-2.30654		FLCN	1.7027e-10	2.49765		Gripap1	2.0116e-05	-2.08015		Krt7	9.98563e-06	-2.88592		Pkn3	1.51681e-06	2.08118
CRIP2	cysteine-rich protein 2					LTBP2	0.000860238	2.07796		Fbn2	8.9488e-06	3.21173		FLJ10213	0.00192179	-2.10888		Gsn	2.11442e-11	-3.46149		Kynu	0.000306543	2.08799		Pnpt1	6.86312e-06	2.02011
CRISPLD1	cysteine-rich secretory protein LCCL do					LUM	0.00288864	-3.01449		Fbxo41	2.96071e-11	2.08011		FLJ20021	2.09608e-10	-2.61458		H19	9.84397e-08	12.4388		L1cam	4.84452e-06	-2.30215		Pole	8.31395e-06	2.0366
CRISPLD2	cysteine-rich secretory protein LCCL do					LYAR	4.77386e-11	3.33859		Fbxo45	1.83853e-11	2.28551		FLJ36031	3.55768e-08	2.39041		H1f0	4.3705e-16	4.38936		LAMA5	4.41364e-05	-2.56662		Prr16	5.63536e-05	-2.84624
CRNDE	colorectal neoplasia differentially exp					LYRM5	5.15065e-12	-3.00094		Frmd4a	2.39757e-08	2.11573		FLJ44342	1.28378e-05	-3.59001		HAUS2	1.29464e-08	2.06324		LAMC2	2.38257e-05	2.89318		Prss16	1.86982e-05	-2.38944
CROT	carnitine O-octanoyltransferase					Lrba	1.436e-13	-2.33928		GAA	7.48818e-11	-3.60619		FLJ90757	8.96335e-11	-2.2268		HAUS8	7.37153e-11	2.13227		LAP3	3.42693e-07	2.31457		QPCT	2.35575e-07	2.31877
CRYAB	crystallin, alpha B					MAGEB2	7.47885e-10	15.6331		GADD45A	2.96991e-09	4.67603		FMNL1	3.53521e-12	2.59619		HBEGF	8.39144e-11	10.0075		LENG8	2.58508e-05	-2.32251		QPRT	0.00194859	-2.01904
CRYL1	crystallin, lambda 1					MAGED1	2.22484e-10	-2.54192		GALNS	2.18283e-07	-2.07403		FMNL2	4.63108e-10	-2.2925		HBP1	5.20979e-10	-2.32922		LIF	0.000417159	2.0428		RAB32	3.76681e-07	-2.16496
CRYZL1	crystallin, zeta (quinone reductase)-li					MAGED2	1.45571e-09	-2.57382		GALNT3	2.86467e-06	2.24168		FNDC3B	2.26851e-08	2.08814		HCFC1R1	3.99641e-08	-3.36108		LIMA1	1.50194e-11	2.46418		RAD51AP1	1.12809e-08	2.51527
CSGALNACT1	chondroitin sulfate N-acetylgalactosami					MAGEH1	0.000306911	-2.03593		GAN	4.33386e-09	2.88358		FOLR1	3.15424e-10	-7.82518		HGSNAT	1.91409e-09	-2.38113		LIN9	3.85452e-12	2.90151		RAD54L	8.0404e-06	2.40291
CSRNP2	cysteine-serine-rich nuclear protein 2					MAL	1.75414e-06	-4.53748		GCC2	5.36012e-06	-2.1871		FOSL1	1.17326e-05	3.19646		HHLA3	7.09972e-05	-2.12084		LMBRD1	1.39079e-07	-2.02791		RAGE	5.06315e-10	2.57645
CTGF	connective tissue growth factor					MAL2	9.35386e-08	-3.6653		GCH1	2.3939e-14	5.8521		FOXC1	3.41945e-10	2.64058		HIST1H2AL	1.77285e-07	2.4543		LOC100128191	1.06408e-06	2.18178		RASD2	2.31293e-10	-5.28555
CTH	cystathionase (cystathionine gamma-lyas					MANEAL	6.00565e-13	-2.61699		GCLM	2.14794e-07	2.45348		FOXO4	3.96488e-06	-2.2906		HIST1H2BK	6.26106e-07	2.38857		LOC100128265	1.40418e-07	-2.05645		RASSF2	1.07058e-05	-2.49653
CTHRC1	collagen triple helix repeat containing					MARCKS	2.12793e-08	-2.03973		GCNT1	1.43815e-12	-3.36587		FOXQ1	5.12759e-16	9.26272		HMGA1	1.40728e-11	4.27521		LOC100128288	7.56024e-09	-5.03565		RBKS	7.01412e-11	-2.68026
CTNNBIP1	catenin, beta interacting protein 1					MASTL	3.63032e-06	2.17281		GGPS1	3.20825e-11	-2.33106		FUK	6.77027e-07	-2.70578		HMGA2	3.32281e-11	4.72616		LOC147670	6.52633e-05	-2.71137		RBM47	7.18106e-11	2.15491
CTNS	cystinosis, nephropathic					MCM4	8.67205e-11	2.36895		GINS2	6.29611e-09	2.0762		FUT4	5.51379e-11	2.88545		HMGCS1	5.22536e-12	-2.88554		LOC151534	1.81899e-05	2.11278		RBP7	1.1492e-12	7.50165
CTPS	CTP synthase					MECOM	1.08034e-09	-4.01855		GIP	8.57547e-08	-2.31929		FXR1	3.80704e-11	-2.0599		HNF1B	9.27596e-09	-4.01869		LOC158376	8.32924e-07	2.77521		RFC3	4.04567e-13	2.41528
CTSL2	cathepsin L2					MEGF9	4.46379e-14	-3.14961		GJA1	0.00105345	-2.18157		FYN	1.05871e-12	3.37547		HOOK2	1.56835e-10	-4.46583		LOC220077	4.93912e-11	2.19135		RGS2	1.33515e-08	4.28448
CTXN1	cortexin 1					MEIS1	1.97937e-09	-2.92626		GLIPR2	6.11824e-09	-2.64359		FZD2	9.88114e-14	-4.08711		HOXB3	5.73773e-11	-2.88468		LOC375190	8.19162e-10	-4.4799		RNF207	0.000175774	2.73632
CUL7	cullin 7					METTL9	9.80434e-08	-2.15476		GLRB	8.47683e-08	-2.02021		Fam100b	2.49761e-06	2.02659		HOXB8	1.96114e-07	-2.15953		LOC377711	1.60059e-07	2.10505		RPP25	7.2985e-07	2.05005
CUX1	cut-like homeobox 1					MFAP5	5.24913e-07	-2.29261		GLS	1.27407e-08	-2.04267		Fam105a	3.84067e-08	2.05323		HOXD9	2.03578e-05	-2.10244		LOC388796	1.03642e-09	2.34115		Rapgef3	1.23946e-06	-2.48871
CXCL2	chemokine (C-X-C motif) ligand 2					MGC16121	0.000319322	2.38766		GLT8D2	5.70443e-08	-3.26828		Fam113a	8.0389e-05	-2.00343		HRH1	6.15157e-10	2.44359		LOC389458	4.2236e-06	-2.18896		Rec8	0.00171884	2.33304
CXXC5	CXXC finger 5					MLLT3	5.50672e-11	-3.04262		GMPR2	2.74817e-11	-2.28669		Fam117a	2.85839e-08	-2.63487		HSD17B11	6.19363e-07	2.13868		LOC401321	8.87903e-08	-2.576		Rhobtb1	2.27055e-05	-3.51011
CYFIP2	cytoplasmic FMR1 interacting protein 2					MMP13	3.53335e-05	-3.53702		GNAZ	1.2282e-05	-2.48731		Fam162a	1.78501e-10	-2.03959		HSD17B6	7.41808e-13	-5.91051		LOC404266	1.32936e-05	-3.15521		Rnase4	1.1707e-07	-4.29639
CYHR1	cysteine/histidine-rich 1					MOSPD3	8.07333e-08	-2.3992		GOLGA2	3.15622e-08	-2.06244		Fam167a	1.85965e-06	2.95278		HSF2BP	2.07343e-11	-4.93217		LOC550643	1.68741e-07	-2.53392		Rnft2	6.01339e-11	2.41099
CYP1B1	cytochrome P450, family 1, subfamily B,					MPV17L	2.68335e-06	2.1327		GOLGA8A	0.000887141	-3.13441		Fam46a	4.54869e-10	2.05647		HTRA1	2.52877e-08	-4.75499		LOC642587	2.86023e-06	-5.3184		S1PR1	0.00478287	2.5672
CYP27C1	cytochrome P450, family 27, subfamily C					MRAP2	0.000535718	-2.11221		GOLGB1	8.80636e-09	-3.12236		Fbxl2	9.56044e-11	-3.54568		Hapln4	6.97403e-11	5.49178		LOC643072	6.37871e-08	-2.1414		SAMD9L	0.00362981	2.00267
CYP2U1	cytochrome P450, family 2, subfamily U,					MT1F	1.69625e-13	6.52808		GPR124	3.64654e-07	-2.49245		Fbxo41	7.11573e-15	3.08387		Hcn3	5.22181e-06	-2.95604		LOC644754	6.88534e-06	2.01905		SAMHD1	3.29593e-08	2.79146
CYP51A1	cytochrome P450, family 51, subfamily A					MTBP	9.56467e-07	2.37943		GPR126	6.7062e-09	2.57856		Fbxo45	3.55236e-11	2.221		Hells	5.69143e-08	2.69128		LOC653877	4.32753e-08	2.24545		SCG5	2.93003e-05	-2.27508
Camk1d	calcium/calmodulin-dependent protein ki					MTMR9L	8.63268e-05	-2.0296		GPR3	3.13336e-07	2.80397		Fbxo46	3.22637e-10	-2.27559		Hexim1	2.44228e-10	-2.15869		LOC727803	7.25344e-06	2.05799		SCN2A	3.50593e-06	-2.09504
Camta2	calmodulin binding transcription activa					MVP	1.31918e-12	-2.68457		GPRC5C	1.77549e-13	-4.79777		Fgd2	2.20153e-06	2.29199		Hexim2	8.19145e-10	-2.74509		LOC729013	2.79564e-07	-2.30355		SEC31B	0.000716362	-2.28747
Card6	caspase recruitment domain family, memb					MXD1	7.61712e-09	2.06858		GPX4	4.35891e-07	-2.38236		G0s2	0.000511624	2.27017		Hist1h1a	2.33097e-07	4.44037		LOC729859	1.12234e-09	-3.01995		SERPINB5	2.36499e-09	3.94827
Cblb	Cas-Br-M (murine) ecotropic retroviral					MXRA5	2.5646e-05	-3.737		GRAMD4	2.24673e-08	-2.0681		GAA	1.00596e-07	-2.32972		Hist1h1d	2.11599e-05	2.14954		LOC90462	1.7362e-09	-2.53733		SERTAD4	5.51443e-07	2.05556
Cbs	cystathionine-beta-synthase					MYC	3.9818e-06	3.14499		GRAMD4	2.97952e-11	-3.17896		GABARAPL1	5.94129e-10	2.32405		Hist1h2bh	4.88694e-06	2.30385		LOC91316	5.04306e-05	-2.57603		SFN	7.52427e-08	2.39461
Ccdc80	coiled-coil domain containing 80					MYL5	6.90748e-06	-2.06527		GRPEL1	1.13514e-07	2.11145		GADD45A	1.10403e-10	6.38781		Hspbap1	4.26394e-09	2.62842		LPHN2	4.29119e-11	-2.78758		SGEF	1.03915e-05	2.57313
Ccnl2	cyclin L2					MYL6B	4.94876e-11	-2.84483		GSDMB	2.8245e-08	-5.84917		GALNT12	2.66038e-05	2.15889		Hspg2	5.60759e-08	-3.66895		LRIG3	7.90831e-08	-3.40172		SGSH	9.09867e-11	-3.00626
Cd55	CD55 molecule, decay accelerating facto					MYO5C	9.26536e-13	2.70685		GSTA4	7.06757e-06	-2.17426		GALNT3	1.81779e-09	3.60161		Htr2b	1.17242e-05	4.19029		LRRC17	1.15777e-05	-5.5161		SH3BGRL	6.12614e-06	-2.0621
Cd70	CD70 molecule					Maff	1.19692e-11	3.657		GSTO2	3.93912e-13	3.30438		GAN	1.23397e-07	2.37541		IDH2	8.81234e-09	-2.37256		LRRC27	7.17674e-10	-3.80645		SH3RF3	2.03809e-06	2.60869
Cdc45	CDC45 cell division cycle 45-like (S. c					Magee1	5.12214e-07	-2.53972		GSTT1	8.06619e-08	-3.03717		GAS8	2.64912e-08	-2.67546		IFI27	2.98541e-16	32.937		LRRC37A3	6.93522e-09	-4.04422		SHCBP1	5.24999e-07	2.12968
Cdca2	cell division cycle associated 2					Mcm10	4.90711e-11	2.56337		GTSE1	1.03974e-12	2.11437		GATA6	1.49511e-07	3.58156		IFI35	2.04804e-05	2.45536		LYAR	3.27951e-10	2.95965		SHF	3.34307e-06	-2.23299
Cdkl3	cyclin-dependent kinase-like 3					Mcm5	1.56084e-08	2.14568		Gabre	0.000403452	-2.81462		GBP3	2.73583e-05	2.05727		IFI44	1.02371e-10	7.6526		LYPD1	2.68886e-09	4.06901		SIPA1L2	4.74488e-12	-2.01331
Cdt1	chromatin licensing and DNA replication					Mesdc1	5.223e-09	2.52079		Galk1	4.62221e-05	-2.02538		GCC2	8.87055e-08	-2.80437		IFI6	1.47891e-08	8.94365		LYRM5	7.59887e-10	-2.31246		SLC10A4	2.38777e-05	3.44707
Celsr3	solute carrier family 26, member 6					Mmp1	0.0080011	-7.83724		Gdpd3	3.94224e-09	-2.52231		GCFC1	2.87301e-07	-2.78501		IFIH1	3.19429e-08	5.4873		Lrrn4	1.48862e-08	2.9332		SLC22A3	0.000376705	-2.30361
Cenpq	centromere protein Q					Msx1	1.51284e-06	2.06162		Gins1	6.10922e-11	2.11253		GCH1	9.265e-17	10.2791		IFIT1	1.91374e-08	6.31009		Ly6e	3.65125e-10	6.77207		SLC24A3	1.71358e-08	-4.44291
Cep110	centrosomal protein 110kDa					N6AMT2	2.01347e-06	-2.05144		Gins4	2.13411e-06	2.04377		GCLM	9.22533e-08	2.57773		IFT172	4.89896e-08	-2.48663		Lyg1	2.34824e-07	-3.31471		SLC26A11	1.69446e-07	-2.89294
Cep70	centrosomal protein 70kDa					NDRG3	2.62363e-08	-2.02722		Glis2	1.16575e-07	-2.09712		GCNT1	8.78572e-16	-5.84777		IFT74	7.57907e-11	-2.58268		MAGEB2	1.03654e-08	10.6266		SLC27A1	1.30518e-07	-2.62249
Ces2	carboxylesterase 2 (intestine, liver)					NEIL1	7.15152e-05	-2.27186		Golph3l	6.0372e-13	-3.21692		GFPT1	5.99217e-11	2.41448		IFT80	3.52036e-05	-2.0544		MAGED1	3.11247e-10	-2.49874		SLC2A10	8.23109e-06	-2.23897
Chac2	ChaC, cation transport regulator homolo					NFE2L3	4.89779e-05	2.03778		Gpn3	5.71192e-10	2.22426		GIP	5.30433e-10	-3.10873		IFT88	9.87605e-07	-2.00645		MAGED2	9.19567e-10	-2.63868		SLC2A12	2.03229e-10	-4.48425
Chsy3	chondroitin sulfate synthase 3					NIPAL3	4.30339e-11	-2.57068		Gprc5a	2.69088e-14	2.90564		GJA1	0.000108825	-2.65214		IGDCC4	1.47465e-05	2.02041		MAGEH1	0.000187349	-2.10645		SLC44A3	1.676e-07	-2.59673
Cmbl	carboxymethylenebutenolidase homolog (P					NIPSNAP1	3.05562e-10	-3.16921		Grb14	1.65259e-05	-3.38871		GLIPR2	1.50334e-07	-2.22604		IGFBP5	2.90944e-10	-3.56686		MAGI2	2.54096e-07	-2.3266		SLC48A1	4.07373e-10	-2.58399
Cnnm4	cyclin M4					NOP16	4.06726e-07	2.08437		Gsn	7.99703e-12	-3.69696		GLRX2	4.39997e-11	2.64969		IL32	3.71359e-13	16.0677		MAL2	2.36336e-07	-3.40299		SLCO4A1	2.31882e-05	2.31871
Cnpy4	canopy 4 homolog (zebrafish)					NPNT	3.06974e-05	-2.44969		H19	1.42543e-08	17.0563		GLS	2.04098e-16	-6.31001		IL6	2.11581e-09	31.312		MARCKSL1	1.14865e-09	-2.38266		SLITRK5	0.00386627	-2.0546
Cnrip1	cannabinoid receptor interacting protei					NR2F2	1.08892e-05	-2.20563		H1f0	3.62947e-16	4.44979		GMPR2	4.27561e-12	-2.49143		IL8	0.000870945	4.83204		MASTL	3.18551e-06	2.18873		SMC2	1.03207e-05	2.03166
Cobll1	COBL-like 1					NT5DC2	1.28133e-08	2.01172		H6pd	2.35503e-10	-2.5096		GOLGA8A	1.92094e-06	-6.82086		INADL	1.3089e-10	-3.63305		MBOAT1	4.73042e-07	2.01406		SMOC1	4.81592e-09	-2.30658
Coch	coagulation factor C homolog, cochlin (					NT5E	3.45052e-06	2.20941		HAUS2	1.31595e-09	2.28638		GOLGB1	6.27686e-09	-3.19453		INHBA	1.23922e-05	4.09627		MCM4	3.58625e-10	2.22062		SNX8	2.10225e-08	2.23105
Col17a1	collagen, type XVII, alpha 1					NTNG2	1.74584e-05	-2.1936		HAUS8	2.84925e-11	2.21887		GOT1	5.43235e-17	3.81928		INHBE	7.68349e-08	4.69356		MED24	7.50674e-12	2.55096		SPATA20	2.68944e-06	-2.06434
Col5a1	collagen, type V, alpha 1					NUAK2	2.57756e-06	2.1205		HBEGF	3.34377e-12	15.4087		GPR125	1.16115e-07	-2.1427		INSIG1	9.03317e-08	-2.4805		MEGF9	1.62735e-14	-3.3444		SPSB1	6.31958e-07	-2.05802
Col6a3	collagen, type VI, alpha 3					NUDT15	4.21764e-10	2.13449		HBP1	1.92726e-10	-2.44342		GPR137B	8.11952e-10	2.57151		IRAK2	1.83161e-09	3.49046		MEIS1	8.76908e-11	-3.5862		SSBP2	5.40442e-08	-2.48543
Coq4	coenzyme Q4 homolog (S. cerevisiae)					NUF2	2.37964e-08	2.24093		HCFC1R1	4.23538e-10	-4.84905		GPT2	1.33946e-09	2.04611		IRF7	1.43752e-06	2.77708		MFAP3L	1.12784e-09	-3.23255		ST5	1.82555e-06	-2.09261
Cps1	carbamoyl-phosphate synthetase 1, mitoc					NUP155	2.62911e-12	2.08886		HCG4	8.06047e-05	-2.11939		GRAMD3	5.81965e-11	-2.56277		IRF9	1.16572e-08	3.30406		MFAP5	9.37719e-10	-3.37782		STAMBPL1	8.81462e-10	2.27598
Cpsf6	cleavage and polyadenylation specific f					Nags	2.41226e-10	2.22618		HDAC4	2.2803e-11	-2.89539		GRB10	1.21505e-13	4.77604		ISG15	1.39874e-10	9.65955		MGC16121	8.24383e-07	-4.03818		STEAP1	2.73863e-08	5.48391
Cpt1c	carnitine palmitoyltransferase 1C					Ngf	4.62921e-08	2.91947		HGSNAT	2.6177e-12	-3.46129		GSDMB	1.83691e-09	-7.95381		ITFG3	6.90021e-07	-2.06707		MGC4294	7.64076e-06	-2.27801		STEAP3	4.34674e-10	-2.72772
Crat	carnitine acetyltransferase					Nicn1	2.38176e-11	-4.48777		HHLA3	1.42647e-05	-2.35489		GSTA4	3.84728e-06	-2.25246		ITPR1	2.72004e-14	4.7481		MKI67	1.07129e-05	-2.57304		STIL	5.223e-11	2.07303
Crem	cAMP responsive element modulator					Nptx2	4.68774e-09	11.0497		HIST1H2AL	9.34936e-12	4.84406		GSTM4	4.73069e-06	-2.23213		ITPRIP	2.82418e-08	2.92435		MMP13	1.1794e-09	-12.0268		STX3	5.46557e-11	2.07302
Ctso	cathepsin O					ODC1	5.89625e-10	3.32894		HIST1H2BG	1.10646e-08	4.29087		GSTO2	5.75073e-13	3.22901		IVNS1ABP	3.88612e-18	-4.25459		MMP19	3.00913e-05	-2.11748		SULF2	2.59684e-05	-2.32412
Cxcl3	chemokine (C-X-C motif) ligand 3					ORC6L	1.98156e-08	2.22571		HIST1H2BG	4.61715e-07	2.84818		GSTT1	3.20838e-08	-3.24066		Id3	1.51734e-06	2.04793		MOSC2	4.46209e-08	-2.01648		SUSD1	1.07664e-08	2.04403
Cyp24a1	cytochrome P450, family 24, subfamily A					Oas3	1.51038e-06	2.34525		HIST1H2BK	1.86152e-10	4.11268		GTPBP10	3.77796e-15	3.1056		Ifit2	1.04308e-11	7.25598		MOSPD3	1.36102e-06	-2.07026		SYNE1	2.14583e-11	-2.63806
Cytsb	cytospin B					Odz2	0.00903875	-2.22106		HMGA1	2.48436e-11	4.09373		GYS1	5.43948e-15	-3.23427		Ifit3	2.53293e-09	10.0022		MPV17L	2.49184e-07	2.43315		SYTL2	5.47141e-09	-2.5998
D2hgdh	D-2-hydroxyglutarate dehydrogenase					Ogt	1.95996e-06	2.35276		HMGA2	1.51621e-09	3.51862		Galk1	3.32859e-05	-2.06488		Ifitm1	3.12198e-10	17.573		MRAP2	2.2082e-05	-2.70264		Sat1	3.14204e-08	-2.45041
DACT1	dapper, antagonist of beta-catenin, hom					Orai3	4.62528e-11	-2.61328		HMGCS1	8.06666e-09	-2.0267		Gars	2.62873e-15	2.18426		Ifrd2	1.22687e-12	2.20587		MT1F	4.42574e-13	5.96582		Sh3bgr	1.69413e-09	-2.32172
DCAF6	IQ motif and WD repeats 1					Orc1l	9.72666e-12	2.65545		HNF1B	1.49334e-09	-4.69264		Gdpd3	1.41671e-11	-3.53502		Impa2	8.3977e-11	-4.05512		MTBP	1.87746e-05	2.01028		Ska1	6.27032e-07	2.39636
DCAF8	WD repeat domain 42A					PACS2	5.29175e-11	-2.41923		HOOK2	2.2706e-10	-4.33334		Gemin8	2.65161e-10	-2.13096		Irf1	1.63969e-09	2.6448		MTP18	2.4447e-07	2.20171		Slc29a3	1.10259e-05	-2.43912
DCDC2	doublecortin domain containing 2					PADI3	6.4266e-06	2.75339		HOXA13	1.57641e-05	-3.19977		Golim4	1.01253e-09	-2.5932		KBTBD3	1.45786e-09	-3.08544		MUC1	4.15791e-10	-4.57028		Slc3a1	4.50067e-12	-3.25118
DCLK1	doublecortin-like kinase 1					PANX2	1.26455e-07	-2.41898		HOXB3	6.63916e-10	-2.52426		Gprc5a	5.56414e-11	2.04824		KCNMB4	9.97779e-05	-2.01354		MVP	2.21582e-11	-2.34249		Slpi	8.80304e-07	-3.67385
DCLRE1B	DNA cross-link repair 1B (PSO2 homolog,					PAQR7	1.58851e-16	3.47091		HOXB8	7.22427e-08	-2.27038		Grb14	1.05881e-10	-13.2664		KDM4B	2.53507e-10	-2.34286		MYC	8.49686e-06	2.95551		Snx29	1.57086e-11	-2.43047
DCUN1D3	DCN1, defective in cullin neddylation 1					PAX8	3.75546e-12	-2.95123		HOXD9	7.12136e-06	-2.23731		H19	2.76063e-11	56.1955		KDM5B	6.23864e-15	-3.0495		MYD88	1.29965e-08	2.02192		Sorcs2	9.28552e-08	-2.4105
DDAH1	dimethylarginine dimethylaminohydrolase					PCDHB10	4.96643e-09	-4.5246		HS1BP3	1.27163e-05	-2.09906		H1f0	4.81886e-21	13.2152		KIAA0182	9.89266e-12	-3.19185		MYL5	6.34367e-08	-2.70258		Sox4	2.1742e-05	-2.26983
DDIT3	DNA-damage-inducible transcript 3					PCDHB13	9.41029e-06	-2.04513		HSD17B11	2.27565e-07	2.25177		HARBI1	5.53754e-11	2.51625		KIAA0319L	1.05575e-09	-2.0588		Maff	2.34489e-10	3.01651		Spint1	2.14245e-05	-2.62577
DDX11	DEAD/H (Asp-Glu-Ala-Asp/His) box polype					PCDHB14	2.59807e-06	-2.55177		HSD17B6	8.08344e-11	-4.00044		HAS3	1.47485e-07	-2.6924		KIAA0895L	2.67518e-05	-2.33439		Mcm10	7.37401e-12	2.83342		Spock1	4.07279e-06	-2.09517
DDX21	DEAD (Asp-Glu-Ala-Asp) box polypeptide					PCDHB2	0.000361059	-2.29531		HSD17B8	4.47056e-06	-2.10355		HAUS2	3.52955e-10	2.43584		KIAA1009	1.05718e-07	-2.32213		Mcm5	9.8812e-10	2.44946		Steap2	1.30464e-07	2.02643
DDX58	DEAD (Asp-Glu-Ala-Asp) box polypeptide					PCDHB7	1.42969e-06	-2.97498		HSF2BP	4.93701e-10	-3.82889		HBEGF	9.60489e-08	4.63026		KIAA1522	6.38651e-10	-2.74963		Megf8	1.91993e-06	-2.43874		Sult1c2	2.83895e-15	-4.39867
DDX60L	DEAD (Asp-Glu-Ala-Asp) box polypeptide					PCLO	2.42493e-11	-2.98497		HTRA1	5.63099e-10	-6.98528		HCFC1R1	1.92716e-08	-3.55019		KIF12	8.17885e-11	-3.57633		Mesdc1	2.49814e-08	2.32253		Sycp3	1.88646e-06	2.72823
DECR1	2,4-dienoyl CoA reductase 1, mitochondr					PCMTD1	6.36747e-09	-2.5007		Hapln4	1.81764e-10	5.03564		HGSNAT	1.30171e-09	-2.42738		KIF16B	2.0316e-06	-2.09569		Mid2	8.64141e-08	-2.21729		Syt7	1.17623e-05	-2.24316
DECR2	2,4-dienoyl CoA reductase 2, peroxisoma					PCOLCE2	8.29456e-06	2.99551		Hcn3	1.57948e-05	-2.71055		HIBCH	8.08617e-10	-2.02394		KIT	9.02192e-05	-2.52082		Moap1	1.53408e-10	-2.15341		TACC3	7.86349e-08	2.10721
DENND2A	DENN/MADD domain containing 2A					PDCD4	3.51053e-09	-2.45641		Hells	6.34076e-07	2.33572		HIST1H2AL	1.19665e-11	4.74576		KLF10	6.71256e-09	2.11876		Mypn	1.88707e-06	2.02		TAF4B	9.61783e-09	2.00403
DEPDC1B	DEP domain containing 1B					PDE6D	1.33946e-11	-2.08462		Hexim1	6.97908e-10	-2.06651		HIST1H2BG	2.64948e-05	2.36765		KLHDC9	2.38095e-05	-2.83432		NADSYN1	4.66671e-07	-2.12607		TBC1D12	3.72227e-09	2.01565
DEPDC7	DEP domain containing 7					PDSS1	1.28641e-07	3.6031		Hexim2	4.90311e-09	-2.48839		HIST1H2BG	2.56827e-05	2.18881		KLHL24	6.10418e-09	-2.98892		NAV1	2.60161e-11	-2.01986		TCAM1P	1.96324e-06	4.06469
DFFB	DNA fragmentation factor, 40kDa, beta p					PEG10	1.54381e-17	8.14126		Hist1h1a	6.25671e-06	3.28464		HIST1H2BK	1.78381e-07	2.57288		KRT80	5.77965e-10	-2.11235		NCAPH	7.04568e-09	2.20512		TCF7	3.26191e-06	2.04091
DGAT1	diacylglycerol O-acyltransferase homolo					PEX11G	7.25223e-06	-2.2937		Hist1h1c	4.54182e-08	3.31208		HIST1H3H	1.04673e-05	2.14957		KRT81	2.09858e-12	4.50568		NCEH1	3.78475e-05	2.10025		TCP11L1	7.13207e-09	-2.02508
DGKI	diacylglycerol kinase, iota					PEX2	5.27895e-11	-2.28445		Hist1h1d	3.59795e-05	2.08192		HIST2H2BE	6.5229e-06	2.46371		KRT86	5.17535e-07	2.90657		NEIL1	1.65462e-07	-3.58058		TFEB	7.49746e-10	-2.00554
DHCR24	24-dehydrocholesterol reductase					PF4V1	3.4497e-05	-2.15221		Hist1h2ae	5.14096e-05	3.08692		HMGA1	2.19595e-11	4.1321		Kctd13	1.25547e-07	-2.20554		NFE2L3	3.01934e-09	3.91409		TINAGL1	1.7418e-13	4.2227
DHCR7	7-dehydrocholesterol reductase					PHF21A	2.10994e-09	-2.25602		Hist1h2bh	2.82557e-10	4.61047		HMGA2	3.89019e-11	4.66463		Klf4	3.49464e-09	3.79945		NFKBIA	6.35627e-05	2.08359		TIPIN	4.19002e-11	2.12922
DHDPSL	N-acetylneuraminate pyruvate lyase 2 (p					PIGZ	6.44456e-09	-4.37559		Hjurp	3.47314e-10	2.01174		HMGCR	1.91666e-10	-2.24991		Krt7	7.1966e-07	-3.58777		NID2	1.19747e-05	2.48269		TJP2	2.88516e-08	2.45736
DHTKD1	dehydrogenase E1 and transketolase doma					PIH1D2	0.000129699	-2.00827		Hrct1	7.6413e-08	-2.43897		HMGCS1	1.5809e-13	-3.56177		Ktn1	4.87286e-07	-2.8822		NINL	0.000136877	-2.53352		TMEM101	2.50923e-16	6.38108
DHX32	DEAH (Asp-Glu-Ala-His) box polypeptide					PIK3C2B	1.22848e-06	-2.06807		Hspg2	2.0016e-06	-2.79777		HNF1B	4.84958e-11	-6.47862		Kynu	1.25902e-07	3.77837		NIP7	4.09419e-07	2.25067		TMEM154	2.3354e-07	-2.50927
DHX33	DEAH (Asp-Glu-Ala-His) box polypeptide					PKIA	0.000100745	-2.96376		Htr2b	0.000469139	2.82847		HOOK2	5.24262e-09	-3.41358		L1cam	5.0637e-08	-3.09326		NIPAL3	5.34605e-11	-2.5426		TMEM187	1.40179e-06	-2.35482
DHX40	DEAH (Asp-Glu-Ala-His) box polypeptide					PKMYT1	1.22998e-10	2.69162		ID2	1.33828e-05	2.15577		HOXA13	0.00275533	-2.02977		LAMA5	1.03782e-06	-3.47886		NIPSNAP1	7.53486e-09	-2.61476		TMEM194A	1.25289e-08	2.0378
DIAPH2	diaphanous homolog 2 (Drosophila)					PLAC8L1	0.00466869	2.44739		IDH2	4.2655e-10	-2.79334		HOXB3	4.67337e-12	-3.35624		LAMC2	1.31845e-07	4.6178		NOC3L	3.71472e-09	2.24445		TMEM47	3.94463e-12	-6.41238
DIXDC1	DIX domain containing 1					PLAT	1.7404e-10	8.06672		IFI27	3.94765e-16	31.3935		HOXB8	2.25979e-10	-3.14786		LAP3	2.81132e-06	2.06962		NOP16	2.72121e-07	2.12542		TMPO	0.000476393	3.01963
DKC1	dyskeratosis congenita 1, dyskerin					PLAUR	5.97126e-11	6.21227		IFI35	0.000386486	2.00176		HRH1	4.12893e-12	3.22509		LARP7	2.53298e-07	-2.17206		NPNT	1.72235e-08	-4.44724		TMSB15B	1.53609e-06	2.34253
DLGAP5	discs, large (Drosophila) homolog-assoc					PLK4	1.00162e-07	2.11564		IFI44	6.84567e-11	8.00464		HSD17B6	1.20183e-12	-5.65691		LENG8	3.71875e-06	-2.65361		NRBP2	2.07118e-07	-2.7585		TMSB15B	0.000106106	2.65546
DNA2	DNA replication helicase 2 homolog (yea					PLSCR4	9.37348e-08	-2.7456		IFI6	4.40083e-09	10.5151		HSF2BP	4.14528e-11	-4.65341		LETM2	2.55076e-05	2.17817		NT5E	2.05067e-06	2.27616		TNC	4.6434e-05	2.84411
DNAJB13	DnaJ (Hsp40) related, subfamily B, memb					PMEPA1	3.73904e-06	-2.15438		IFIH1	3.81521e-08	5.38768		HSPA1B	1.97029e-06	-2.00644		LFNG	6.48059e-12	-2.18189		NUAK2	8.62186e-09	2.951		TNNT1	1.96377e-06	-2.56418
DNAJC25	DnaJ (Hsp40) homolog, subfamily C , mem					PNRC1	6.23063e-08	-2.85335		IFIT1	1.05126e-08	6.74678		HSPA5	6.63697e-10	2.36412		LIF	1.94496e-05	2.5482		NUCB1	3.45254e-07	-2.07136		TNS3	8.0961e-09	-2.14112
DNAL4	dynein, axonemal, light chain 4					POLE2	1.36625e-13	2.08515		IFT172	6.03811e-10	-3.24694		HTRA1	4.39393e-06	-3.03888		LIMA1	6.09358e-10	2.0899		NUDT15	1.61413e-11	2.47283		TPD52L1	2.68626e-09	-2.98698
DNASE2	deoxyribonuclease II, lysosomal					POLQ	9.04629e-06	2.00209		IFT74	9.49685e-12	-2.88778		Hapln4	1.4856e-09	4.21076		LIN9	5.02319e-12	2.85913		NUF2	9.64155e-08	2.09681		TRIM13	1.42941e-06	-2.08591
DNM1	dynamin 1					POLR3G	1.05281e-06	2.04035		IFT80	2.58955e-05	-2.09191		Hexim1	7.16359e-12	-2.5362		LNPEP	4.5379e-07	2.90506		NUMA1	1.25978e-06	-2.05085		TRPS1	7.4916e-12	-2.58807
DNMBP	dynamin binding protein					PPARA	6.94745e-10	-2.45422		IFT88	5.70705e-07	-2.05958		Hexim2	2.9342e-10	-2.91336		LOC100128191	5.26906e-07	2.26565		Nags	1.11373e-09	2.08505		TSHZ3	5.46022e-06	2.10174
DNMT3B	DNA (cytosine-5-)-methyltransferase 3 b					PPIF	1.68184e-09	2.39386		IGDCC4	2.91478e-06	2.21012		Hist1h1a	0.00137077	2.083		LOC100128265	6.91888e-09	-2.377		Nbr2	4.11805e-08	-2.19685		TSPAN1	3.3075e-07	-2.72264
DOCK1	dedicator of cytokinesis 1					PRDM1	8.01889e-07	-2.92464		IL32	3.76534e-13	16.036		Hist1h1c	1.67152e-08	3.56903		LOC100134189	4.14326e-09	2.1221		Neil3	1.01232e-08	2.29564		TSTD1	1.67116e-08	-3.19465
DOCK11	dedicator of cytokinesis 11					PSG4	5.31067e-08	3.92641		IL6	4.52224e-09	27.0179		Hist1h2ae	1.44235e-06	4.37652		LOC151534	1.5953e-08	3.32181		Nicn1	1.60736e-07	-2.4684		TTC32	1.34489e-08	-2.03047
DPCD	deleted in a mouse model of primary cil					PSG9	3.82876e-17	16.8255		IL8	0.00109577	4.6465		Hist1h2bh	7.3439e-07	2.59273		LOC158376	1.37909e-06	2.68118		Nmu	2.63968e-09	3.29073		TTF2	2.58599e-05	2.49358
DPP3	dipeptidyl-peptidase 3					PSTK	3.9879e-10	2.62398		INADL	5.66351e-10	-3.28633		Hk2	4.7834e-09	2.3551		LOC220077	5.65898e-11	2.1788		Nptx2	8.87032e-08	7.48507		TUBA1A	1.373e-05	-2.04169
DPYD	dihydropyrimidine dehydrogenase					PTGR2	4.33543e-05	-2.42668		INHBA	0.00566284	2.15007		Hmg20b	1.89855e-11	-2.33836		LOC221710	5.23213e-08	2.21726		ODC1	9.12526e-08	2.44449		TUBA4A	9.10238e-11	-2.16791
DSCC1	defective in sister chromatid cohesion					PTPLAD2	0.00108711	-2.05697		INPP4B	4.43605e-09	-2.51799		Hrsp12	2.05864e-07	-2.39183		LOC341378	3.29764e-10	-3.01938		OLFML2A	2.45191e-08	-2.74325		TXNIP	3.22857e-08	-3.22886
DST	dystonin					PTPN13	3.31622e-07	-2.38101		INPP5F	1.44235e-10	3.12491		Hspbap1	1.9538e-16	10.4057		LOC375190	6.16453e-09	-3.80323		OLFML3	1.60347e-06	-4.28733		Taf5	1.48578e-11	2.43277
DUSP1	dual specificity phosphatase 1					PUS1	2.22023e-06	2.13062		INSIG1	1.53439e-08	-2.7519		Hspg2	9.70159e-09	-4.24182		LOC377711	5.26677e-10	2.84118		ORC6L	3.06532e-08	2.1799		Tmem170b	1.7178e-08	-2.63605
DUSP3	dual specificity phosphatase 3					PWP2	3.69987e-09	2.07146		IPPK	3.54702e-11	2.38959		ICAM3	1.61879e-07	-2.15711		LOC388796	2.99749e-10	2.48855		OSBPL3	7.2718e-13	2.66699		Tmem173	3.9327e-06	-2.29816
DUSP4	dual specificity phosphatase 4					PYROXD2	4.79609e-05	-2.26775		IRAK2	3.22442e-08	2.87502		IDH2	4.3078e-11	-3.20433		LOC389458	1.66116e-06	-2.30934		Oas3	3.34265e-13	7.7975		Trip13	1.3726e-08	2.09026
DVL3	dishevelled, dsh homolog 3 (Drosophila)					Pc	8.07819e-09	-2.03608		IRF7	1.0975e-06	2.83057		IFI27	2.2597e-16	34.5725		LOC401321	3.7296e-08	-2.71367		Odz2	0.000113033	-3.71715		Tspan2	7.33233e-07	-2.12997
DYNC2LI1	dynein, cytoplasmic 2, light intermedia					Pdcd11	1.19927e-07	2.06762		IRF9	1.09703e-08	3.31833		IFI35	2.24127e-07	3.44065		LOC404266	4.38064e-06	-3.48441		Orai3	8.16795e-10	-2.27113		Tubb4	0.00560109	-2.27474
DYSF	dysferlin, limb girdle muscular dystrop					Pigw	7.8833e-05	2.2804		ISG15	4.07647e-11	11.3005		IFI44	2.36127e-09	5.51856		LOC442075	8.07289e-05	2.42627		Orc1l	7.83748e-11	2.3948		URB2	4.13148e-08	2.45006
DZIP1	DAZ interacting protein 1					Pim1	9.38599e-09	2.48331		ITFG3	2.78226e-09	-2.77254		IFI6	2.02455e-07	6.45058		LOC550643	4.6904e-08	-2.73811		P4ha3	2.31577e-07	-3.74814		Uap1l1	4.15148e-09	2.8561
DZIP1L	DAZ interacting protein 1-like					Pkn3	1.07497e-06	2.11797		ITPR1	2.35476e-12	3.45247		IFIH1	2.71528e-09	7.16414		LOC642132	2.6823e-05	-2.65951		PA2G4P4	8.16001e-10	2.16931		Uchl1	3.90612e-11	7.44501
Dars2	aspartyl-tRNA synthetase 2, mitochondri					Plekhg4	3.96212e-05	2.02437		ITPRIP	4.38227e-09	3.31454		IFIT1	2.60451e-05	3.08899		LOC642587	2.73603e-08	-9.60579		PABPC1L	0.00614404	-2.0514		VAV1	2.75287e-07	-2.36581
Dbf4	DBF4 homolog (S. cerevisiae)					Pnpt1	1.23256e-06	2.21352		IVNS1ABP	6.95795e-19	-4.82889		IFT122	1.07789e-08	-2.62895		LOC644754	1.38542e-06	2.19862		PACS2	8.97302e-11	-2.35969		VPS37D	8.9898e-08	-2.39238
Dbndd1	dysbindin (dystrobrevin binding protein					Procr	2.48257e-08	2.16185		Ier5l	1.75666e-06	-2.22132		IFT172	8.11435e-11	-3.72623		LOC653877	1.66093e-08	2.35646		PADI2	3.35085e-07	2.25234		VRK1	5.44526e-11	2.06347
Dcaf15	chromosome 19 open reading frame 72					Prr16	0.0019487	-2.08827		Ifit2	4.68782e-13	10.2805		IFT57	3.27308e-07	-2.00546		LOC729013	3.60974e-06	-2.01594		PAK1IP1	3.07937e-09	2.11075		WDR76	3.06657e-08	2.05398
Dclk2	doublecortin-like kinase 2					Prss16	2.12275e-06	-2.78209		Ifit3	9.81381e-10	11.3639		IFT80	8.2766e-07	-2.58354		LOC729859	4.85894e-11	-3.72184		PANX2	3.35676e-06	-2.03219		WNT5A	9.96564e-06	2.83525
Ddx60	DEAD (Asp-Glu-Ala-Asp) box polypeptide					QPCT	1.68242e-11	4.30124		Ifitm1	2.01341e-10	18.8512		IFT88	2.42821e-08	-2.41563		LOC732446	1.24714e-06	-2.0867		PAQR7	2.98695e-15	2.93217		Wdhd1	3.14876e-08	2.16108
Depdc1	DEP domain containing 1					QPRT	9.08638e-06	-3.17074		Igfn1	1.32249e-05	-2.56288		IGDCC4	2.87234e-12	5.98862		LOC90462	6.37008e-10	-2.67878		PARP12	9.84478e-11	2.41425		Wdr25	1.28243e-09	-2.29614
Dfna5	deafness, autosomal dominant 5					RAB38	5.77875e-09	-3.35808		Impa2	1.66123e-13	-6.96974		IGFBP1	8.70052e-05	5.81074		LOC91316	0.000130221	-2.39065		PARP9	8.89455e-07	2.39536		XAF1	1.23368e-07	5.80338
Dhrs2	dehydrogenase/reductase (SDR family) me					RAD54L	3.56916e-07	2.9715		Ing4	1.95202e-11	-3.5521		IGFBP5	9.04951e-09	-2.84474		LPHN1	7.58684e-08	-2.49407		PCDHB13	3.52958e-06	-2.15753		YPEL2	3.03171e-09	-3.8312
Dmrt3	doublesex and mab-3 related transcripti					RAGE	5.51275e-12	3.34822		Irf1	2.42763e-09	2.58838		IL15RA	1.01156e-08	2.44172		LPHN2	2.91629e-10	-2.51788		PCDHB14	1.89435e-07	-3.05506		ZFHX4	1.12925e-09	-2.01816
Dopey2	dopey family member 2					RALGPS1	2.72756e-05	-2.42745		Jhdm1d	2.01992e-06	2.39689		IL32	3.22397e-15	34.1638		LRIG3	2.35253e-08	-3.73852		PCDHB15	5.3525e-06	-2.95172		ZFP2	1.53585e-06	-2.04071
Dph3b	DPH3, KTI11 homolog (S. cerevisiae)					RASD2	2.60884e-09	-4.27584		KCNMB4	2.48821e-07	-2.97701		IL6	2.69545e-10	47.7802		LRP12	3.33738e-07	2.14795		PCDHB2	0.000170357	-2.44095		ZNF117	9.59819e-06	-2.30661
Dyx1c1	dyslexia susceptibility 1 candidate 1					RASSF1	5.98909e-10	2.36325		KCTD1	6.86777e-08	-2.1129		IL6ST	1.84691e-07	2.38771		LRRC17	1.59133e-06	-7.18594		PCMTD1	3.31006e-09	-2.59108		ZNF323	5.34866e-08	-2.0852
E2F1	E2F transcription factor 1					RASSF2	2.57293e-07	-3.27497		KCTD5	1.39194e-10	2.38439		IL8	0.000183786	6.29513		LRRC27	8.8162e-10	-3.7484		PCOLCE2	0.000252867	2.27972		ZNF610	2.55898e-06	-2.01698
E2F7	E2F transcription factor 7					RBKS	3.81209e-09	-2.20041		KDM5B	9.4031e-15	-2.981		INHBA	8.06787e-08	7.31615		LRRC37A3	1.75712e-09	-4.5387		PDCD4	2.9462e-11	-3.22741		ZNF788	9.18541e-07	2.59818
E2F8	E2F transcription factor 8					RBMS3	5.70167e-10	-5.86264		KIAA0182	7.35558e-09	-2.23563		INHBE	8.7288e-15	40.0172		LRRC6	8.31302e-07	-2.13573		PDDC1	2.08249e-08	-2.23557		ZNF850P	2.39103e-07	3.3819
EBF4	early B-cell factor 4					RBP7	2.17465e-11	5.61989		KIAA0319L	5.3544e-10	-2.11739		INO80D	3.8041e-13	2.01445		LUM	0.00723228	2.64757		PEG10	1.53481e-17	8.14615		ZNF862	1.70595e-09	-3.7058
EBP	emopamil binding protein (sterol isomer					RFC3	1.51799e-12	2.27851		KIAA0513	3.93057e-09	-2.39943		INPP4B	1.62244e-09	-2.66024		LYAR	2.10939e-10	3.03993		PEX11G	2.03283e-06	-2.48406		Zeb2	0.000180179	2.62907
EEA1	early endosome antigen 1					RGS2	1.6232e-07	3.48326		KIAA0895L	4.01352e-05	-2.27109		INSIG1	1.30471e-06	-2.14452		LYPD1	5.3472e-09	3.85229		PF4V1	3.53372e-13	-10.2396		abhd4	4.22914e-10	-2.33548
EFCAB7	EF-hand calcium binding domain 7					RNF207	1.1154e-05	3.54888		KIAA1009	2.8075e-07	-2.20689		IQCK	2.87524e-12	-2.80032		Lcn2	0.000152067	3.3159		PHF21A	7.00085e-10	-2.37751		adhfe1	1.07347e-05	-2.04297
EFEMP1	EGF-containing fibulin-like extracellul					RNF212	0.00131598	-2.07511		KIAA1467	7.76446e-08	2.14644		IRAK2	6.23937e-09	3.20474		Lpxn	1.10243e-05	2.04034		PHLDB1	2.69288e-11	-2.34888		aifm2	1.06952e-11	2.9224
EFEMP2	EGF-containing fibulin-like extracellul					RPL22L1	1.64217e-07	2.26543		KIAA1522	6.4693e-08	-2.1629		IRF7	6.1036e-11	6.45577		Lrch1	0.0127219	2.09251		PID1	4.34785e-06	2.25137		akr1c2	9.31521e-05	-2.72369
EFHC1	EF-hand domain (C-terminal) containing					RPP25	1.04007e-09	2.91626		KIF12	3.68054e-10	-3.23285		IRF9	5.46567e-10	4.15732		Ltbp1	5.68545e-06	2.11028		PILRB	3.12343e-06	-3.85661		arsD	2.1542e-10	-2.77872
EFHD1	EF-hand domain family, member D1					Rabgap1l	7.37004e-10	-2.47937		KIFC2	2.06495e-05	-2.60373		ISG15	1.42088e-11	13.0068		Ly6e	1.15973e-09	6.00681		PIM3	3.79484e-10	2.04877		bdh2	9.49902e-05	-2.10303
EFNA1	ephrin-A1					Rapgef3	1.13142e-06	-2.50295		KIT	3.15194e-08	-5.08135		ISL2	1.76608e-05	2.35968		Lyg1	1.63858e-07	-3.40865		PITPNC1	2.15771e-08	2.1553		c10orf140	0.000883332	2.02747
EFNA4	ephrin-A4					Recql4	1.95729e-06	2.12131		KLHDC3	9.55326e-10	-2.27981		ITFG3	5.75261e-07	-2.08548		MAGEB2	3.90938e-09	12.208		PKMYT1	2.88865e-09	2.29281		c17orf108	2.73035e-07	-3.17407
EHBP1	EH domain binding protein 1					Rhobtb1	3.11935e-05	-3.40102		KRCC1	9.92323e-10	-2.41677		ITPR1	7.44708e-17	8.08545		MAGED1	2.47163e-12	-3.27733		PLAC8	1.62353e-07	-2.057		c20orf108	1.38709e-07	-2.16602
EID3	EP300 interacting inhibitor of differen					Rnase4	6.14484e-09	-5.71281		KRT80	4.21819e-13	-3.00276		ITPRIP	8.12144e-11	4.47387		MAGED2	6.41745e-11	-3.07656		PLAT	2.42652e-09	6.05643		ca12	1.85288e-10	-3.38294
EIF2AK2	eukaryotic translation initiation facto					Rnf19b	3.04496e-09	2.33211		KRT81	2.18077e-09	2.80677		IVNS1ABP	1.68279e-22	-10.5348		MAGEH1	0.000196095	-2.09982		PLAUR	2.97141e-08	3.60602		cdc6	8.88341e-13	3.21855
EIF2C2	eukaryotic translation initiation facto					Rnft2	4.0331e-12	2.76267		Kctd18	8.36245e-06	-2.04421		Id3	1.30834e-06	-2.06306		MAGI2	3.34412e-07	-2.29214		PLK1S1	1.46266e-06	-2.34695		clic3	9.39072e-06	-3.28922
EIF4EBP1	eukaryotic translation initiation facto					Rps27l	2.15353e-06	-2.12076		Klf4	1.40975e-11	6.10853		Ier5l	1.16041e-05	-2.00514		MAK16	2.39373e-12	2.02587		PLK4	1.96067e-08	2.28916		col12a1	2.79629e-05	-2.48525
EIF5	eukaryotic translation initiation facto					S100A8	7.44606e-05	-5.118		Klhl22	5.60144e-09	-2.69413		Ifit2	1.2306e-13	12.1289		MAL2	5.53916e-07	-3.18448		PLS1	1.15532e-07	2.09485		crabp2	3.26506e-08	2.89806
ELFN2	extracellular leucine-rich repeat and f					S100A9	4.11557e-08	-6.55728		Klhl35	7.15567e-05	2.04849		Ifit3	5.44598e-10	12.331		MAN2B2	8.52515e-07	-2.17467		PMAIP1	4.23125e-08	2.38122		crip1	1.79006e-11	5.47176
ELL2	elongation factor, RNA polymerase II, 2					SAMD9L	0.00246562	-2.07408		Krt7	3.85777e-06	-3.11716		Ifitm1	9.10551e-11	21.4734		MANSC1	5.04842e-05	-2.16274		PMEPA1	4.84349e-09	-3.23368		ctsf	8.05429e-07	-2.12033
ELOVL6	ELOVL family member 6, elongation of lo					SCML2	4.0277e-05	2.26536		L1cam	3.95151e-05	-2.03207		Igfn1	5.85146e-05	-2.30467		MAP4	2.49851e-10	-2.04579		PNRC1	6.82139e-10	-3.92143		cyb5a	5.15711e-08	2.38488
EMG1	EMG1 nucleolar protein homolog (S. cere					SCN2A	5.34778e-06	-2.04886		LAMC2	1.73429e-07	4.49741		Il20rb	8.7986e-08	3.61424		MAP9	4.69019e-10	-2.34789		POLE2	2.64496e-15	2.45133		dhrs1	2.56267e-08	-2.36585
EML1	echinoderm microtubule associated prote					SCRN2	5.52574e-06	-2.3295		LAP3	3.14471e-06	2.0577		Impa2	1.31867e-10	-3.91954		MASTL	6.94273e-06	2.09622		POLQ	3.11892e-06	2.11807		dpm3	7.99393e-08	-2.14118
EMR1	egf-like module containing, mucin-like,					SEC24D	1.0468e-06	-2.0549		LETM2	2.66186e-07	2.93787		Ing4	2.34056e-10	-3.02796		MATN3	8.42903e-06	2.10494		POLR3G	1.09554e-08	2.58907		dtl	6.65746e-10	2.52816
ENDOD1	endonuclease domain containing 1					SEC31B	0.000620928	-2.31626		LFNG	1.51402e-12	-2.32079		Irf1	4.33779e-15	6.77211		MBOAT1	2.06431e-08	2.34529		POLR3K	5.43219e-06	2.08283		dusp5	1.17572e-05	2.1085
ENG	endoglin					SELM	1.91905e-06	2.16876		LIF	8.22359e-05	2.29457		JDP2	5.98667e-07	2.12151		MECOM	7.19176e-08	-2.96105		PPARG	2.06999e-05	2.01583		dusp6	1.17452e-05	3.40251
ENGASE	endo-beta-N-acetylglucosaminidase					SERPINB5	8.43214e-10	4.28916		LIN9	1.02649e-12	3.13086		Jhdm1d	1.97023e-09	3.84847		MED11	4.81103e-09	-2.35915		PPIEL	4.13101e-06	-2.53569		fam107b	4.29147e-11	2.86417
ENOSF1	enolase superfamily member 1					SFN	9.07499e-11	3.62193		LNPEP	5.00265e-08	3.41091		KBTBD3	1.28822e-08	-2.69886		MED24	1.77405e-13	3.1188		PPIF	2.57955e-11	3.0006		fam171a1	1.93547e-06	3.10497
EPB41L1	erythrocyte membrane protein band 4.1-l					SGK1	3.71407e-11	3.75572		LOC100128288	3.0766e-09	-5.4921		KCNMB4	2.98517e-05	-2.17007		MEGF9	1.80626e-14	-3.3233		PPIL5	2.04064e-11	2.416		fam172a	6.72049e-08	-2.06864
EPHA2	EPH receptor A2					SGK2	0.000278919	-2.38085		LOC100129502	4.62229e-08	-2.10022		KCTD1	2.73123e-09	-2.47579		MEIS1	3.19765e-11	-3.85203		PRDM1	1.56845e-06	-2.78747		fam198b	2.73496e-06	-3.45231
EPHA4	EPH receptor A4					SGSH	9.77965e-11	-2.99332		LOC147670	0.00069373	-2.22163		KCTD5	1.07948e-11	2.71045		MFAP3L	6.06971e-09	-2.90123		PRIM2	1.8699e-06	2.0304		fam54a	7.75975e-12	2.45565
EPM2AIP1	EPM2A (laforin) interacting protein 1					SH3BGRL	7.89509e-10	-3.56971		LOC151534	6.94409e-06	2.2366		KIAA0146	8.85299e-11	-2.52159		MFAP5	7.10815e-07	-2.25487		PRKAG2	3.12836e-12	2.54581		fanci	6.8886e-09	2.01558
EPS8L2	EPS8-like 2					SH3GL3	4.31659e-06	-2.37011		LOC158376	7.09618e-08	3.30938		KIAA0586	1.00218e-08	-2.1193		MGC16121	2.50272e-08	-5.71521		PSG4	4.14127e-05	2.35847		foxa1	2.54798e-05	-2.21073
EPSTI1	epithelial stromal interaction 1 (breas					SHF	6.96542e-06	-2.14148		LOC202781	4.79508e-07	-2.07991		KIAA0895L	3.87107e-05	-2.27664		MGC4294	3.72871e-07	-2.762		PSG9	1.09679e-14	8.42811		fucA1	5.639e-09	-2.37817
ERAP1	endoplasmic reticulum aminopeptidase 1					SLC10A4	6.30628e-08	6.46673		LOC220077	1.8017e-11	2.28899		KIAA1009	7.25574e-09	-2.69399		MICAL3	2.2181e-08	-2.44894		PSTK	9.20374e-11	2.84526		hapln3	9.6645e-08	2.27054
ERCC5	excision repair cross-complementing rod					SLC16A5	0.000136424	-2.02054		LOC221710	1.74162e-07	2.09274		KIAA1024	9.31553e-06	2.17697		MITF	4.58436e-08	-2.08861		PTGES	5.21408e-15	5.29005		herc6	1.43439e-06	2.38774
ERCC6L	excision repair cross-complementing rod					SLC1A5	1.76514e-08	2.26675		LOC375190	3.99207e-11	-5.87326		KIAA1522	1.49792e-07	-2.07899		MKI67	8.97933e-08	-3.70733		PTMS	1.31117e-05	-2.03112		hgd	4.76154e-11	-2.57288
ERI3	exoribonuclease 3					SLC22A1	0.00358867	2.04801		LOC377711	2.30119e-10	2.98406		KIF12	1.55776e-10	-3.42236		MLLT3	1.11637e-09	-2.56616		PTPN13	8.90105e-10	-3.45049		hlx	2.39615e-06	-2.22107
ERMAP	erythroblast membrane-associated protei					SLC24A3	2.89437e-08	-4.24174		LOC388796	1.97242e-11	2.87726		KIF9	1.81156e-10	-2.61685		MLLT6	9.11896e-09	-2.19644		PTPRM	5.77883e-08	-2.25084		hmgcL	1.29856e-08	-2.53578
ERRFI1	ERBB receptor feedback inhibitor 1					SLC27A1	9.11362e-07	-2.33763		LOC390940	4.24333e-05	2.44654		KLF10	5.85193e-13	3.48634		MMD	1.02259e-15	2.23219		PXDN	8.88088e-07	-2.53267		hoxa1	0.00154685	2.01653
ESCO2	establishment of cohesion 1 homolog 2 (					SLC2A10	1.05563e-06	-2.5423		LOC401321	5.7597e-09	-3.05243		KLF9	1.98495e-12	3.11534		MMP13	4.90938e-11	-19.3766		PYROXD2	3.43102e-09	-4.7365		hoxa2	0.0140722	2.10375
ESPL1	extra spindle pole bodies homolog 1 (S.					SLC31A2	2.34332e-07	2.07555		LOC440311	2.00619e-06	-2.33422		KLHDC3	2.87069e-11	-2.71531		MMP19	3.3268e-05	-2.10464		Pc	6.17454e-09	-2.0592		hyi	2.2547e-10	2.48167
ETS1	v-ets erythroblastosis virus E26 oncoge					SLC7A11	1.47447e-06	-2.37738		LOC442075	0.000815022	2.03426		KLHDC8B	6.40197e-07	-2.02434		MOCOS	3.79338e-10	2.30521		Pdp1	1.09116e-06	2.11449		kiaa1370	5.99262e-08	-2.56508
ETV2	ets variant 2					SLCO4A1	1.60688e-07	3.2985		LOC550643	2.78205e-11	-4.64987		KLHDC9	0.00037743	-2.26258		MOSC2	2.69619e-08	-2.06103		Phf15	2.66724e-09	2.00374		kiaa1524	4.45017e-07	2.65932
ETV5	ets variant 5					SNORA32	0.0121689	2.69517		LOC642132	4.27561e-05	-2.56432		KLHL29	1.69239e-07	2.70051		MOSPD3	4.04096e-08	-2.49262		Pigw	5.79883e-06	2.7569		lat	1.76235e-08	3.09519
EVL	Enah/Vasp-like					SNORA61	3.33766e-05	3.08672		LOC642587	7.48172e-08	-8.38948		KRCC1	8.18144e-09	-2.18482		MOXD1	7.62116e-07	-2.17069		Pkd2	3.3563e-10	-2.42643		lbh	2.65055e-10	-5.67642
EYA4	eyes absent homolog 4 (Drosophila)					SOX12	1.40591e-08	-2.13467		LOC643988	7.15772e-09	-3.00504		KRT81	1.78039e-08	2.49117		MPDZ	1.42166e-06	-2.02789		Pld3	2.09447e-07	-2.26143		lhpp	2.01549e-09	-4.10313
EZH1	enhancer of zeste homolog 1 (Drosophila					SPAG16	1.00932e-08	-2.14398		LOC644754	2.29765e-06	2.13951		KRT86	2.92173e-06	2.57944		MPV17L	1.99934e-07	2.46422		Pnpt1	1.52072e-08	2.85984		llgl2	2.53776e-05	-2.14262
Echdc2	enoyl Coenzyme A hydratase domain conta					SPAG5	1.53011e-06	2.22733		LOC645638	7.21531e-08	-5.46911		Kbtbd11	4.41498e-09	2.48135		MRAP2	0.000506833	-2.1212		Prkcz	5.31711e-08	-2.0204		lpar1	2.1542e-05	-2.19479
Efhd2	EF-hand domain family, member D2					SPCS3	3.77547e-10	2.31505		LOC645984	0.00116437	2.18558		Kdelc1	1.89326e-10	-2.601		MSX2	2.20139e-10	2.66841		Prr16	0.00055097	-2.33219		macrod2	5.38679e-08	-3.23707
Egr1	early growth response 1					SPP1	0.00729974	-2.51993		LOC653877	2.79643e-07	2.0529		Kif21b	1.74385e-11	5.91077		MT1F	4.28456e-13	5.98364		Prss16	1.79746e-08	-4.01914		malL	6.55806e-10	-3.14936
Eif1	eukaryotic translation initiation facto					SPRY2	1.83478e-10	2.86602		LOC727803	1.23647e-05	2.00022		Klf4	1.80816e-13	9.68408		MTBP	5.30197e-06	2.1564		QPCT	2.80954e-09	3.00427		map2k6	2.4741e-05	-2.47729
Eif4g3	eukaryotic translation initiation facto					SPRY4	1.54976e-08	4.89401		LOC728485	4.83457e-10	2.03099		Klf5	5.92535e-13	3.25083		MTP18	1.38639e-07	2.26683		QPRT	0.000124503	-2.5388		mapt	4.37266e-08	-2.2865
Eif5a2	eukaryotic translation initiation facto					SRI	1.40595e-07	-2.01833		LOC729013	2.87225e-09	-3.01068		Klhl22	3.63411e-07	-2.15274		MUC1	2.26979e-11	-5.9319		RAB3B	1.96227e-05	2.03941		2010-03-03	5.6231e-06	2.62237
Eif5b	eukaryotic translation initiation facto					SSBP2	3.37027e-09	-2.92717		LOC729859	5.57358e-11	-3.68591		Klhl35	4.00734e-08	3.37974		MVP	5.89278e-11	-2.24257		RAD18	5.20884e-07	2.05421		mcm2	8.68533e-09	2.00053
Eml2	echinoderm microtubule associated prote					STAMBPL1	1.27255e-11	2.81898		LOC732446	1.29344e-07	-2.34835		Krt7	3.09087e-06	-3.17444		MXD1	3.84293e-11	2.65735		RAD51AP1	2.29344e-08	2.4208		mest	1.71272e-15	4.14926
En2	engrailed homeobox 2					STAU2	4.5964e-09	-2.13871		LOC90462	9.24646e-11	-2.99233		Ktn1	3.69865e-05	-2.16396		MYC	0.000399155	2.18148		RAGE	1.73777e-10	2.72942		mgst2	2.92721e-09	-2.18463
Enah	enabled homolog (Drosophila)					STEAP1	8.50126e-06	3.19348		LOC91316	0.000238725	-2.28001		Kynu	4.758e-10	6.34145		MYD88	3.65432e-10	2.37253		RALGDS	6.57312e-08	-2.17728		micB	1.38068e-10	7.06927
Enc1	ectodermal-neural cortex (with BTB-like					STIL	3.33411e-11	2.11032		LPHN2	5.79159e-12	-3.1284		LAMC2	6.69613e-08	4.93437		MYL5	9.72547e-08	-2.63292		RALGPS1	0.000129676	-2.17498		mn1	0.000140484	-2.04342
Epas1	endothelial PAS domain protein 1					STMN3	4.78583e-08	2.68002		LRIG3	6.41642e-08	-3.45659		LENG8	2.30324e-06	-2.74494		MYL6B	1.35352e-08	-2.14234		RASD2	4.63968e-10	-4.96288		mx1	1.23039e-11	14.4744
Ept1	selenoprotein I					STYXL1	4.36676e-09	-2.16599		LRRC17	1.13525e-05	-5.53024		LETM2	1.13872e-07	3.1196		MYLK	5.83935e-07	-2.18063		RASSF2	1.72835e-08	-4.06666		nat14	1.05616e-09	-2.4654
Erbb2	v-erb-b2 erythroblastic leukemia viral					SULF2	0.000154101	-2.0639		LRRC27	8.38394e-12	-5.48673		LFNG	3.46934e-16	-3.61931		MYO5C	3.49863e-11	2.27591		RBKS	2.19125e-11	-2.85652		ncapd3	1.56725e-09	2.20476
Ets2	v-ets erythroblastosis virus E26 oncoge					SUSD1	1.14929e-11	2.84742		LRRC37A3	8.27941e-07	-2.81891		LGR4	1.14464e-10	-2.58667		Maff	2.51942e-13	4.88204		RBM47	7.02204e-12	2.38537		nme3	1.80537e-06	-2.19251
Evi2a	ecotropic viral integration site 2A					SUSD5	0.000171816	2.30761		LRRC6	8.88207e-07	-2.12852		LHFPL2	2.01529e-12	2.95248		Man2b1	2.29273e-05	-2.04316		RBMS3	9.11915e-05	-2.21667		nptxr	2.37899e-10	-3.70652
Exo1	exonuclease 1					SYTL2	2.61856e-07	-2.12561		LRRC8C	1.11326e-05	2.1004		LIAS	2.47835e-06	2.03031		Matn2	2.59203e-08	-3.58397		RBP7	9.33364e-13	7.66735		nrcam	9.24046e-07	-2.99458
Extl2	exostoses (multiple)-like 2					Sec61a2	4.95453e-06	2.08262		LUM	6.97868e-07	-9.78924		LIF	2.05974e-09	5.47815		Mcm10	4.48785e-11	2.57505		RECK	7.59475e-06	-2.30873		nsmce1	5.9247e-08	-2.00624
F11r	F11 receptor					Senp5	8.5651e-14	2.23993		LXN	3.83425e-07	-2.38049		LIN54	3.48897e-06	2.19757		Mcm5	6.74985e-10	2.49746		RFC3	5.24987e-14	2.66114		nupr1	7.16174e-08	-4.06121
F12	coagulation factor XII (Hageman factor)					Sh3bgr	5.27655e-09	-2.2011		LYAR	9.65389e-12	3.71735		LIN9	4.67233e-11	2.54197		Megf8	2.22097e-07	-2.80069		RFWD3	7.29286e-10	2.04513		oscp1	2.41486e-07	-2.1528
FADS2	fatty acid desaturase 2					Sirt2	1.1502e-08	-2.44784		LYRM5	6.75422e-12	-2.95456		LOC100128288	2.71272e-07	-3.65912		Mesdc1	4.45694e-08	2.25578		RGS2	9.75734e-09	4.40302		palm	2.03928e-06	-3.69144
FAM113B	family with sequence similarity 113, me					Ska1	2.1634e-06	2.23219		Ly6e	1.29477e-08	4.75429		LOC100133690	1.65826e-08	-2.37184		Mrc2	8.62056e-08	-2.74769		RPL22L1	2.84519e-08	2.48874		phf19	7.03612e-08	2.08995
FAM114A1	family with sequence similarity 114, me					Slc25a25	7.35991e-12	2.28197		Lyg1	1.27119e-06	-2.91889		LOC151534	7.06362e-13	8.01531		Mta1	2.00274e-11	-2.09328		RPP25	1.07317e-09	2.91075		phlda1	1.30716e-09	2.45987
FAM126A	family with sequence similarity 126, me					Slc39a11	3.78176e-07	-2.03483		MAGEB2	4.10566e-10	17.1683		LOC158257	0.000868767	-2.34435		Mthfd2l	6.18098e-07	2.19405		RPP40	1.68751e-08	2.37384		plekha7	5.29211e-09	-2.2898
FAM127A	family with sequence similarity 127, me					Slc3a1	9.38517e-10	-2.41696		MAGED1	1.74319e-13	-3.90124		LOC202781	5.06564e-07	-2.0744		Myof	1.28996e-08	-2.1716		RRBP1	1.83065e-08	-2.83781		plscr1	1.446e-08	2.55385
FAM129A	family with sequence similarity 129, me					Slfn5	1.61823e-05	-2.40171		MAGED2	3.99026e-12	-3.68031		LOC220077	9.16192e-11	2.13549		NADSYN1	1.29994e-06	-2.02189		RRP15	1.0732e-07	2.05566		ppl	3.27201e-06	-2.46339
FAM134B	family with sequence similarity 134, me					Slpi	7.30328e-10	-7.42034		MAGEH1	0.000155724	-2.13353		LOC221710	6.23632e-08	2.19831		NAMPT	7.96818e-06	2.07097		RRP9	1.84783e-09	2.21311		proS1	2.45023e-05	-2.05282
FAM169A	family with sequence similarity 169, me					Snx29	6.52442e-13	-2.85518		MAK16	4.42246e-13	2.16105		LOC284023	1.37317e-10	2.1984		NAT6	4.44524e-06	-2.12086		RSPH3	1.49069e-07	-2.27609		prss23	4.8431e-08	-2.19797
FAM24B	family with sequence similarity 24, mem					Sorcs2	2.09888e-11	-4.14427		MAL2	4.89949e-07	-3.21474		LOC375190	8.06228e-05	-2.00613		NAV1	5.17026e-13	-2.37142		RTTN	2.77344e-07	2.04477		prss3	6.48193e-09	4.66116
FAM40B	family with sequence similarity 40, mem					Sox4	3.01176e-06	-2.58726		MAN2A1	4.2151e-05	2.06844		LOC375295	0.000491984	-2.61797		NCAPH	3.44714e-08	2.0529		Rapgef3	1.04348e-06	-2.51568		rab31	7.44672e-07	2.00534
FAM49A	family with sequence similarity 49, mem					Spock1	2.5569e-06	-2.14826		MANBA	9.49861e-07	-2.15557		LOC377711	4.50403e-13	4.58266		NCEH1	3.22967e-05	2.12065		Rhobtb1	3.52857e-08	-7.06335		rab40b	9.99133e-09	-3.13672
FAM54B	family with sequence similarity 54, mem					Stx8	4.5629e-08	-2.24474		MANEAL	3.0473e-12	-2.42097		LOC388796	1.09679e-08	2.10072		NCOA7	4.40095e-09	2.6479		Rnase4	2.44962e-09	-6.28404		rad54b	2.36116e-09	2.00774
FAM59B	family with sequence similarity 59, mem					Sult1c2	1.26615e-14	-3.95251		MAP3K1	9.47871e-09	2.01941		LOC390834	1.44521e-09	2.04833		NCOR1	2.43754e-07	-2.15069		Rnft2	1.61686e-11	2.571		rph3al	4.05612e-10	-3.27909
FAM64A	family with sequence similarity 64, mem					Sycp3	1.75121e-08	3.87827		MAP9	1.31033e-10	-2.49859		LOC401097	0.000161006	2.17701		NFE2L3	3.01358e-10	4.73039		S1PR1	0.000999419	3.1318		rrs1	5.73375e-07	2.24601
FAM78A	family with sequence similarity 78, mem					Syngr3	7.17269e-07	2.19942		MARCKS	1.41549e-10	-2.58368		LOC401321	1.95714e-09	-3.27948		NFIA	1.48151e-08	-2.1553		SAMD9	9.52578e-05	2.28029		rtn2	4.16486e-06	-2.36059
FAM89B	family with sequence similarity 89, mem					Syt11	1.5916e-06	3.62662		MASTL	3.71446e-06	2.17003		LOC404266	3.0962e-07	-4.46695		NFKBIA	1.96157e-06	2.60686		SAMD9L	4.72098e-05	2.95158		runx3	1.40569e-05	2.27316
FAM8A1	family with sequence similarity 8, memb					Syt7	1.21158e-05	-2.23907		MATN3	4.15641e-06	2.19034		LOC642132	4.35187e-06	-3.0752		NINL	1.17391e-05	-3.12334		SAMHD1	1.19455e-11	4.97066		sh3yl1	2.07794e-11	-3.08336
FANCA	Fanconi anemia, complementation group A					TACC3	1.18705e-08	2.30727		MBOAT1	1.70046e-08	2.36878		LOC642852	1.21129e-08	-2.54246		NIP7	7.67284e-08	2.46657		SATB2	0.000271917	2.00061		slc22a2	4.12474e-09	-6.05367
FANCE	Fanconi anemia, complementation group E					TAF4B	3.57371e-11	2.58915		MBTPS1	2.77572e-11	-2.00271		LOC643988	5.57963e-06	-2.04427		NIPAL3	1.0527e-10	-2.45839		SCN2A	5.1325e-09	-3.07071		stc1	0.00216668	-2.36473
FANK1	fibronectin type III and ankyrin repeat					TBC1D22A	9.3103e-09	-2.51982		MCCC1	1.13274e-08	-2.30087		LOC644504	1.26929e-08	2.552		NIPSNAP1	2.9126e-11	-3.70958		SCRN2	2.70601e-06	-2.43591		sytl3	7.6637e-07	2.45515
FARS2	phenylalanyl-tRNA synthetase 2, mitocho					TBCK	2.45919e-11	-2.31256		MCFD2	1.58392e-08	2.00427		LOC644877	3.61098e-09	-2.03779		NOC3L	1.23701e-08	2.12431		SDC2	1.75444e-06	-2.27366		tbc1d19	9.00542e-13	-3.20295
FARSB	phenylalanyl-tRNA synthetase, beta subu					TCAM1P	4.12931e-06	3.78166		MCM4	3.49615e-10	2.22313		LOC645166	3.48692e-06	2.67155		NOP16	1.03558e-08	2.51556		SEMA3B	0.0017879	-2.04901		tbx15	2.57758e-08	-2.42074
FBLN2	fibulin 2					TCEA3	3.47779e-05	2.55888		MECOM	1.40991e-09	-3.93576		LOC645984	0.000696984	2.28576		NPNT	1.98903e-13	-16.0243		SERPINB5	2.06986e-10	4.82787		tdo2	0.000138902	-2.04343
FBRSL1	fibrosin-like 1					TCF4	6.69693e-12	-3.43204		MED11	1.67845e-09	-2.48907		LOC653155	4.18074e-07	-2.32444		NRBP2	4.1643e-08	-3.07075		SERTAD4	1.2346e-07	2.21181		tgfbi	1.42119e-08	2.10935
FBXO3	F-box protein 3					TCN2	4.39117e-06	2.41464		MED24	5.7105e-11	2.31706		LOC653506	3.97688e-07	2.12741		NT5E	4.31314e-08	2.88031		SFN	3.93053e-08	2.48156		thbs2	2.08574e-08	5.93928
FBXO32	F-box protein 32					TCTEX1D2	1.49818e-11	-2.69844		MEGF9	2.13454e-15	-3.80637		LOC728431	4.64571e-06	-2.01479		NUAK2	2.31676e-08	2.77395		SGEF	3.36374e-05	2.36758		thrB	1.57667e-10	-2.80258
FBXO43	F-box protein 43					TFEB	1.73803e-11	-2.35075		MEIS1	2.45819e-12	-4.68652		LOC729013	2.97563e-08	-2.61201		NUCB1	6.29275e-09	-2.53898		SGK1	3.73433e-09	2.78436		tmem150a	4.03735e-09	-2.64339
FBXO9	F-box protein 9					TINAGL1	2.13435e-10	2.68963		MFAP3L	2.88948e-08	-2.63986		LOC729859	2.86309e-08	-2.49602		NUDT15	1.25807e-12	2.81591		SGK2	0.000751574	-2.19207		trim2	1.25582e-12	-2.42766
FBXW9	F-box and WD repeat domain containing 9					TJP2	2.64807e-07	2.18735		MFAP5	5.0945e-10	-3.52398		LOC732446	2.36108e-09	-2.96085		NUMA1	2.58498e-09	-2.87237		SGSH	1.71024e-11	-3.33439		tspan15	4.33995e-09	-2.43765
FDPS	farnesyl diphosphate synthase (farnesyl					TMEM101	1.66639e-19	14.1686		MGC4294	5.36343e-08	-3.15491		LOC91316	7.74039e-06	-2.99504		NUP155	4.10813e-13	2.25024		SGSM2	8.08934e-06	-2.32406		ttll1	4.58517e-06	-3.37693
FEN1	flap structure-specific endonuclease 1					TMEM133	4.18306e-08	-2.13363		MLLT3	2.32137e-11	-3.20782		LONRF1	1.02631e-12	2.77219		NUP35	9.467e-09	2.1444		SH2B3	1.71833e-07	2.29134		ubl3	3.28346e-11	-2.86855
FGF2	fibroblast growth factor 2 (basic)					TMEM170A	4.71397e-10	2.02773		MLLT6	7.28225e-08	-2.00157		LPHN2	3.30606e-13	-3.75678		Nags	3.01363e-12	2.75183		SH3BGRL	5.85584e-07	-2.34616		upp1	1.71001e-09	3.09727
FGF5	fibroblast growth factor 5					TMEM187	1.24088e-07	-2.73096		MLX	4.73104e-17	2.00334		LRIG3	1.83546e-08	-3.81336		Nbr2	2.22151e-07	-2.03017		SH3GL3	1.51451e-08	-3.47902		vldlr	0.00039245	-2.05699
FGFBP1	fibroblast growth factor binding protei					TMEM194A	2.77734e-12	3.10493		MLYCD	9.25268e-08	-2.37044		LRRC27	1.35694e-10	-4.33116		Nedd4l	2.41594e-10	2.42771		SH3RF3	1.45116e-08	3.73069		ypel3	3.40824e-07	-3.2359
FHDC1	FH2 domain containing 1					TMEM47	4.17423e-10	-4.24356		MMP13	1.64592e-10	-16.0441		LRRC37A3	1.84574e-07	-3.13805		Neil3	6.93718e-09	2.33894		SHCBP1	4.99039e-08	2.40685
FIGNL1	fidgetin-like 1					TMEM8B	1.89296e-08	-2.08901		MOCOS	3.54713e-09	2.08739		LUC7L	7.97684e-08	-2.09446		Nfkbie	2.44507e-10	2.61567		SHF	3.00825e-06	-2.2466
FKBP1A	FK506 binding protein 1A, 12kDa					TNFSF10	7.38784e-05	-4.84216		MON2	8.72171e-07	-2.04367		LUC7L3	6.9294e-14	-3.90408		Nicn1	4.62351e-09	-3.06642		SIPA1L2	9.36958e-14	-2.3564
FKBP7	FK506 binding protein 7					TNS3	1.08097e-10	-2.64166		MOSPD3	1.09445e-07	-2.3599		LXN	2.46632e-07	-2.44136		Nlgn2	8.52024e-08	-2.13529		SLC10A4	1.21869e-06	4.66523
FLCN	folliculin					TPD52L1	2.36554e-10	-3.50599		MOXD1	1.18771e-07	-2.39801		Lamb3	5.01657e-07	3.56774		Nmu	7.8313e-07	2.31273		SLC16A5	1.2518e-05	-2.35665
FLJ10213	hypothetical protein FLJ10213					TRPM4	6.5663e-10	2.94388		MPDZ	1.75817e-06	-2.00706		Lcn2	5.64098e-11	23.6965		Nptx2	2.39979e-08	8.85606		SLC22A3	6.99556e-06	-3.22058
FLJ20021	hypothetical LOC90024					TRPS1	7.73655e-15	-3.87045		MPI	2.9984e-09	-2.0618		Ldlr	5.24368e-09	-3.1699		Nrip3	1.1452e-05	2.33685		SLC24A3	5.11799e-09	-4.96057
FLJ27352	hypothetical LOC145788					TSNAXIP1	5.53487e-06	-2.16518		MPP1	9.27303e-09	-2.00683		Ldoc1	5.22384e-08	-2.27732		OAF	1.48942e-09	2.14294		SLC27A1	1.14997e-08	-3.06023
FLJ36031	hypothetical protein FLJ36031					TSPAN1	8.73533e-10	-4.18374		MPPE1	1.05237e-07	-2.45358		Leprel2	8.44102e-06	-2.26871		OCEL1	6.60361e-07	-2.19374		SLC2A10	2.71699e-07	-2.77597
FLJ44342	hypothetical LOC645460					TXNIP	2.32904e-09	-3.92985		MPV17L	1.25927e-06	2.22197		Ly6e	2.06805e-09	5.66822		ODC1	3.09316e-09	2.9883		SLC2A12	1.83672e-10	-4.52193
FLJ45513	hypothetical LOC729220					Taf5	1.88445e-12	2.69417		MRAP2	0.000140815	-2.34014		Lyg1	2.09046e-08	-4.02599		OLFML2A	7.32902e-12	-4.89832		SLC31A2	6.84687e-08	2.20181
FLJ90757	hypothetical LOC440465					Tceal1	7.70317e-11	-2.10352		MT1F	1.09054e-13	6.81345		Lyplal1	1.14709e-12	2.27428		OLFML3	9.1507e-09	-7.53931		SLC44A3	3.54263e-08	-2.86119
FLRT2	fibronectin leucine rich transmembrane					Tcfl5	5.09861e-09	-2.27337		MTBP	9.21879e-07	2.38459		Lztr1	1.3601e-09	-2.28969		ORC6L	1.20646e-08	2.27988		SLC4A3	7.51929e-06	-2.22896
FMNL1	formin-like 1					Tgif2	4.74549e-11	-2.1079		MTERFD3	9.21503e-07	-2.13587		MAD1L1	4.44351e-13	4.29544		OS9	7.44056e-09	-2.26076		SLC5A2	2.53605e-09	-2.1071
FMNL2	formin-like 2					Tmcc1	1.28025e-12	-2.14745		MTHFSD	1.1431e-10	-2.13286		MAFG	6.6248e-16	3.82479		OSBPL3	2.30323e-12	2.51918		SLCO4A1	5.53631e-08	3.58172
FNBP4	formin binding protein 4					Tmem170b	1.13615e-07	-2.37083		MTP18	1.23957e-06	2.03103		MAGEB2	5.3115e-07	6.35284		OSBPL5	2.06218e-08	-2.17324		SLITRK5	1.55763e-05	-3.44535
FNDC1	fibronectin type III domain containing					Tmem185b	1.05934e-09	2.89899		MUC1	1.034e-08	-3.54045		MAGED1	1.85974e-16	-6.81239		OSGIN1	2.80434e-09	2.00419		SMAD3	4.99023e-09	2.11725
FNDC3B	fibronectin type III domain containing					Tmem48	2.59013e-10	2.44109		MVD	5.93486e-07	-2.04118		MAGED2	7.3311e-12	-3.53228		Oas3	5.36656e-12	5.91739		SNX8	1.02774e-10	2.96432
FOLR1	folate receptor 1 (adult)					Tox	0.000242304	-2.09859		MVP	1.51519e-12	-2.66562		MAGEH1	2.35347e-07	-3.43365		Odz2	3.38344e-07	-7.60141		SOX12	7.75745e-09	-2.1934
FOSL1	FOS-like antigen 1					Trip13	1.38912e-10	2.60482		MXD1	1.16105e-12	3.23997		MAGI3	9.90191e-09	-2.18715		Orai3	9.07203e-11	-2.5249		SP110	2.77091e-07	2.75069
FOXC1	forkhead box C1					Tspan31	1.19789e-10	-2.02323		MXRA5	1.2088e-06	-5.21191		MAL	2.03088e-05	-3.53328		Orc1l	5.20627e-11	2.44209		SPATA20	6.53476e-09	-2.89741
FOXO4	forkhead box O4					Tubb2a	9.76169e-08	2.16495		MYC	1.33994e-06	3.44571		MAL2	1.49652e-05	-2.498		Oxtr	1.04669e-05	-2.18057		SPATA7	4.17085e-11	-2.10085
FOXQ1	forkhead box Q1					UBASH3B	8.24373e-10	2.11153		MYD88	1.74269e-09	2.20631		MANEAL	3.79727e-11	-2.16728		P4ha3	5.33887e-07	-3.4941		SPCS3	5.67557e-09	2.05353
FOXS1	forkhead box S1					UBIAD1	5.67482e-10	2.74058		MYL5	2.75352e-07	-2.47439		MANSC1	2.86832e-06	-2.6152		PA2G4P4	1.20702e-09	2.13292		SPRY2	9.05561e-10	2.62083
FTH1	ferritin, heavy polypeptide 1					ULBP2	2.1202e-14	6.28025		MYL6B	2.73534e-11	-2.9428		MAP9	2.28986e-09	-2.18237		PABPC1L	0.00484897	-2.10174		SPRY4	2.20412e-08	4.73431
FUK	fucokinase					UNC5CL	8.43786e-09	-4.27257		MYO5C	7.1468e-14	3.11311		MATN3	1.07291e-07	2.72416		PAK1IP1	7.71782e-09	2.03026		SRFBP1	5.66871e-06	2.11906
FUT4	fucosyltransferase 4 (alpha (1,3) fucos					UPRT	2.59241e-07	-2.28359		Maff	9.00698e-14	5.31803		MBTPS1	7.7213e-13	-2.31275		PANX1	1.38196e-09	2.31831		SRM	1.02161e-05	2.10229
FXR1	fragile X mental retardation, autosomal					URB2	9.91419e-09	2.65476		Magee1	2.01995e-06	-2.33732		MCCC1	3.10405e-10	-2.7828		PANX2	4.24869e-06	-2.0081		SSBP2	6.50246e-09	-2.8117
FXYD2	FXYD domain containing ion transport re					Uchl1	2.58175e-12	10.1589		Matn2	2.9991e-05	-2.19666		MECOM	3.07628e-14	-11.256		PAQR3	4.24644e-07	2.09221		ST20	3.02617e-05	-3.16326
FYN	FYN oncogene related to SRC, FGR, YES					Uggt2	2.86496e-06	2.06342		Mcm10	1.31785e-11	2.74546		MED10	3.62496e-11	3.02873		PAQR7	6.14378e-16	3.20223		ST5	3.21751e-07	-2.29307
FZD2	frizzled homolog 2 (Drosophila)					Ugt1a3	7.81981e-10	-7.65492		Mcm5	4.75423e-08	2.04149		MED11	1.20637e-09	-2.53241		PARP12	3.02697e-11	2.55838		STAMBPL1	3.85202e-12	3.01571
Faah	fatty acid amide hydrolase					VPS37D	5.18013e-09	-2.81767		Megf8	1.23872e-05	-2.17722		MED24	2.01721e-12	2.7273		PARP9	1.07367e-05	2.0773		STAT1	9.59302e-06	2.0161
Fam100b	family with sequence similarity 100, me					WARS2	1.95739e-14	-2.52855		Mesdc1	1.88545e-10	3.05061		MEGF9	5.72394e-15	-3.56927		PCDHB13	2.78268e-07	-2.49439		STEAP1	2.38029e-09	7.13408
Fam105a	family with sequence similarity 105, me					WDR77	3.62473e-08	2.11472		Mrc2	6.89782e-06	-2.12041		MEIS1	1.45532e-11	-4.08173		PCDHB14	2.18904e-08	-3.58459		STEAP3	1.81603e-08	-2.24643
Fam113a	family with sequence similarity 113, me					WDTC1	9.01073e-09	-2.27007		Msx1	6.57243e-08	2.42965		METT11D1	7.49338e-10	-2.63477		PCDHB15	7.50627e-05	-2.40706		STIL	4.83581e-11	2.07933
Fam117a	family with sequence similarity 117, me					WIPI1	4.77481e-09	-2.17748		NADSYN1	1.66353e-08	-2.53305		MFAP3L	4.70552e-06	-2.00198		PCDHB2	0.000297454	-2.33199		STK36	1.47515e-06	-2.41765
Fam131b	family with sequence similarity 131, me					WNK4	0.000119171	2.00704		NAV1	7.04647e-12	-2.12455		MFHAS1	8.31742e-10	2.12203		PCMTD1	8.47391e-09	-2.46287		STX3	2.87929e-11	2.12673
Fam162a	family with sequence similarity 162, me					WWTR1	4.52257e-06	2.1041		NCEH1	8.97734e-06	2.29504		MICAL3	2.8823e-07	-2.14516		PCNT	0.000248138	-2.04398		SULF2	7.60837e-09	-4.28282
Fam167a	family with sequence similarity 167, me					Wbp5	3.79471e-06	-2.00857		NDST1	1.06683e-09	-2.30965		MICALL1	6.72126e-16	3.34847		PCOLCE2	0.000193858	2.32778		SUSD1	9.37762e-11	2.54688
Fam46a	family with sequence similarity 46, mem					XAF1	0.00538851	2.01279		NFE2L3	3.45501e-09	3.87295		MID1	1.47243e-12	-2.13115		PDCD4	2.07549e-11	-3.29975		SUSD5	8.51508e-05	2.43603
Fam83h	family with sequence similarity 83, mem					YPEL5	3.59213e-08	-2.01076		NFIA	8.17381e-10	-2.47927		MIIP	5.17155e-12	2.21529		PDDC1	1.70218e-10	-2.88392		Sat1	8.09978e-10	-3.03222
Fancd2	Fanconi anemia, complementation group D					ZBTB20	5.85132e-07	-3.10368		NFIB	8.54083e-11	-2.48081		MINK1	2.31047e-10	-2.07369		PDE12	2.09157e-08	2.17806		Sh3bgr	1.67495e-09	-2.32299
Fbn1	fibrillin 1					ZFAND2A	2.49813e-10	2.17631		NFKBIA	4.35563e-05	2.13348		MITF	5.29782e-13	-3.98078		PEG10	5.08392e-14	4.06144		Ska1	1.02884e-07	2.67056
Fbn2	fibrillin 2					ZFP30	1.03056e-09	2.29679		NINL	0.000223345	-2.43171		MKI67	2.58003e-08	-4.11518		PEX11G	2.68158e-07	-2.83655		Slc25a45	1.44741e-06	-2.01831
Fbxl2	F-box and leucine-rich repeat protein 2					ZMYM3	3.31448e-09	-2.13782		NIP7	1.6422e-08	2.69606		MKX	1.26047e-10	3.75189		PF4V1	6.00241e-11	-5.9035		Slc3a1	6.13263e-11	-2.78946
Fbxo41	F-box protein 41					ZNF117	4.8934e-05	-2.08451		NIPAL3	1.51879e-12	-3.08572		MLLT3	1.92889e-10	-2.82713		PGAP3	1.23834e-06	-2.07055		Slpi	5.85174e-05	-2.58622
Fbxo45	F-box protein 45					ZNF135	6.04647e-05	-2.11393		NIPSNAP1	2.21564e-12	-4.49135		MMACHC	1.05648e-07	-2.36324		PGRMC2	3.12365e-10	-2.00615		Snx29	1.36371e-10	-2.20426
Fbxo46	F-box protein 46					ZNF239	5.283e-06	2.21838		NLRX1	7.59755e-08	-2.12346		MMD	5.58477e-15	2.09124		PHACTR4	7.90872e-12	-2.30977		Sorcs2	1.50961e-09	-3.07695
Fbxo5	F-box protein 5					ZNF259	3.86064e-10	2.00054		NOC3L	1.82134e-08	2.08812		MMP13	3.29852e-10	-14.4547		PHF21A	3.36274e-12	-3.17611		Sox4	2.836e-08	-3.62848
Fgd2	FYVE, RhoGEF and PH domain containing 2					ZNF280C	4.89881e-07	2.00967		NOP16	3.60497e-09	2.6676		MMP19	3.48635e-05	-2.09869		PHF3	4.83253e-08	-2.14279		Spint1	0.000218481	-2.20534
Fgfrl1	fibroblast growth factor receptor-like					ZNF323	2.2199e-11	-3.13945		NPNT	3.26306e-13	-14.9481		MOCOS	1.42825e-15	4.94838		PHLDB1	1.23991e-13	-3.09751		Spock1	6.27156e-06	-2.04762
Frmd4a	FERM domain containing 4A					ZNF473	4.36024e-12	2.04811		NRBP2	5.90821e-06	-2.24062		MORN2	3.62335e-07	-2.25327		PID1	2.89162e-08	3.0906		Spsb3	2.32301e-10	-2.23997
G0s2	G0/G1switch 2					ZNF512B	7.50166e-09	-2.01235		NT5DC3	4.69173e-07	2.14635		MOSPD3	2.97963e-08	-2.53562		PIK3C2B	3.12304e-08	-2.50915		Suv39h1	1.34865e-08	2.10921
GAA	glucosidase, alpha; acid					ZNF570	0.000122713	2.28994		NT5E	8.6593e-09	3.2057		MOXD1	2.23831e-10	-3.53439		PILRB	1.77413e-06	-4.07414		Sycp3	5.62125e-06	2.53009
GABARAPL1	GABA(A) receptor-associated protein lik					ZNF610	1.49458e-08	-2.65699		NUAK2	5.33952e-10	3.55732		MPP1	6.88433e-11	-2.50459		PIM3	2.51402e-12	2.55771		Syt7	1.29316e-07	-3.01173
GABBR1	gamma-aminobutyric acid (GABA) B recept					ZNF697	4.80733e-05	2.13731		NUCB1	3.52709e-07	-2.06926		MPPE1	6.6888e-07	-2.2172		PITPNC1	1.30504e-10	2.79552		TAF4B	1.3232e-10	2.42586
GADD45A	growth arrest and DNA-damage-inducible,					ZNF781	1.70407e-05	2.13807		NUDT15	3.10225e-12	2.68506		MPV17L	6.70883e-06	2.03146		PKMYT1	4.02836e-09	2.25691		TBC1D12	9.68158e-11	2.36287
GALNS	galactosamine (N-acetyl)-6-sulfate sulf					ZNF788	7.02479e-08	3.08828		NUF2	6.35151e-09	2.3934		MRAP2	9.30859e-06	-2.8946		PLAC8	4.82343e-11	-3.17269		TCAM1P	0.00040819	2.47407
GALNT12	UDP-N-acetyl-alpha-D-galactosamine:poly					ZNF850P	2.01839e-07	3.42734		NUMA1	4.46331e-07	-2.16002		MSH5	6.04262e-05	-2.16347		PLAT	7.67791e-12	11.8144		TCEA3	0.000184832	2.25436
GALNT3	UDP-N-acetyl-alpha-D-galactosamine:poly					ZNF883	2.65541e-06	-2.09822		NUP155	1.73479e-13	2.33428		MSX2	6.31048e-15	5.43602		PLAU	2.96494e-06	2.624		TCF19	2.07145e-08	2.11041
GAN	gigaxonin					ZSCAN2	2.3244e-08	-2.16788		NUP35	1.52068e-08	2.09953		MT1F	4.56941e-15	9.50877		PLAUR	1.86025e-10	5.56694		TCTN1	6.51966e-08	-2.40345
GAS8	growth arrest-specific 8					Zc4h2	6.10938e-10	-3.14231		NXT2	9.08063e-08	2.09252		MTERFD3	1.26975e-07	-2.37212		PLEKHO2	1.55834e-09	2.06744		TENC1	1.47764e-06	-2.26807
GATA6	GATA binding protein 6					Znf597	2.19623e-05	2.10671		Nags	1.07968e-12	2.90916		MTHFSD	2.06526e-10	-2.08197		PLK1S1	1.78414e-07	-2.66655		TFEB	5.88853e-10	-2.02465
GBP2	guanylate binding protein 2, interferon					abhd4	4.38591e-11	-2.61214		Nbr2	5.03687e-08	-2.17573		MTMR9L	2.54254e-08	-3.51123		PMAIP1	4.66358e-09	2.68976		TIMM8A	3.04307e-05	2.10534
GBP3	guanylate binding protein 3					aifm2	8.35259e-15	4.70832		Nfkbie	3.8944e-10	2.55248		MUC1	1.25916e-09	-4.17021		PMEPA1	1.73596e-08	-2.96985		TINAGL1	1.91827e-14	5.00874
GCC2	GRIP and coiled-coil domain containing					akr1c2	0.000171558	-2.58202		Ngf	4.12462e-07	2.54122		MVD	4.48853e-08	-2.31925		PNRC1	1.8135e-09	-3.64359		TIPIN	1.71885e-13	2.73927
GCFC1	chromosome 21 open reading frame 66					akr1c3	0.0190712	-2.11022		Nicn1	8.50731e-12	-4.88334		MXD1	2.01299e-19	12.8243		POLE2	6.76331e-15	2.35251		TJP2	6.25571e-08	2.3572
GCH1	GTP cyclohydrolase 1					anxa4	4.86215e-10	-2.01806		Ninj1	1.18554e-06	-2.1389		MXRA5	1.22112e-05	-4.04328		POLR3G	3.70939e-09	2.75528		TLE2	0.00124069	-2.02787
GCLM	glutamate-cysteine ligase, modifier sub					arl2	4.80999e-08	-2.27431		Nptx2	1.03453e-08	9.90947		MYC	1.4626e-07	4.18585		POLR3K	2.88138e-06	2.15563		TMEM101	9.53963e-18	8.81676
GCNT1	glucosaminyl (N-acetyl) transferase 1,					arrdc4	3.9422e-05	-2.57198		Nrip3	4.19227e-06	2.49566		MYCBP	4.61356e-09	-2.45312		PPIEL	1.70368e-05	-2.30857		TMEM154	5.09512e-06	-2.10682
GDA	guanine deaminase					bag1	2.02523e-11	2.19114		OCEL1	7.00863e-08	-2.47824		MYD88	1.65973e-11	2.77849		PPIF	1.35289e-12	3.60921		TMEM158	5.9343e-05	2.45249
GFPT1	glutamine-fructose-6-phosphate transami					bdh2	1.50317e-08	-3.94607		ODC1	1.65062e-10	3.63456		MYL6B	5.18457e-11	-2.83738		PPIL5	2.53687e-12	2.67714		TMEM187	8.09854e-08	-2.80643
GGPS1	geranylgeranyl diphosphate synthase 1					bmp2	5.25456e-08	2.45037		OLFML2A	9.15831e-11	-4.00647		MYLK	1.32357e-09	-3.0946		PPM1N	4.90786e-07	-2.27238		TMEM194A	7.96696e-10	2.30373
GINS2	GINS complex subunit 2 (Psf2 homolog)					bysl	1.08774e-10	2.58442		OLFML3	2.68889e-05	-3.25666		MYO5C	5.8971e-15	3.62539		PPP1R15A	1.03174e-05	2.29052		TMEM47	1.08395e-12	-7.29897
GIP	gastric inhibitory polypeptide					c11orf54	3.9873e-10	-2.42208		ORC6L	3.20822e-09	2.43633		Maff	4.18445e-16	8.91604		PRIM2	2.71335e-07	2.23934		TMEM51	6.48741e-08	2.09189
GJA1	gap junction protein, alpha 1, 43kDa					c11orf74	9.00997e-06	-2.06526		OSBPL2	6.36075e-12	-2.00684		Magee1	4.77709e-08	-2.95658		PRKAG2	1.70028e-11	2.35033		TMSB15B	1.38055e-07	2.71308
GLIPR1	GLI pathogenesis-related 1					c17orf108	1.90854e-07	-3.26073		OSBPL3	6.61211e-13	2.6799		Matn2	3.96552e-10	-5.07924		PRRX2	7.57046e-10	2.55197		TMSB15B	0.000301878	2.427
GLIPR2	GLI pathogenesis-related 2					c20orf108	1.26236e-07	-2.17606		OSBPL5	4.5481e-08	-2.09558		Mboat2	2.41757e-09	-2.02355		PSG9	1.16697e-13	6.62674		TNC	0.00186786	2.07019
GLRB	glycine receptor, beta					c20orf46	4.37016e-06	-2.19545		Oas3	3.69616e-12	6.1292		Mdk	8.33645e-08	2.36187		PSTK	3.25062e-11	3.02266		TNNT1	1.46718e-06	-2.61403
GLRX	glutaredoxin (thioltransferase)					c4orf33	3.89524e-08	-2.46387		Odz2	4.90965e-06	-5.40567		Mesdc1	1.56934e-08	2.37859		PTGES	3.98004e-15	5.41136		TNS3	3.32007e-11	-2.81639
GLRX2	glutaredoxin 2					c6orf165	1.36154e-08	-2.50805		Orai3	1.14342e-13	-3.72382		Mrc2	1.56861e-05	-2.02626		PTGR2	0.000122875	-2.24916		TPD52L1	2.0224e-11	-4.19282
GLS	glutaminase					ca12	6.0013e-09	-2.72149		Orc1l	9.85734e-11	2.36903		Msx1	2.51098e-06	2.0104		PTMS	1.46658e-07	-2.63093		TRIM13	7.46983e-08	-2.43874
GLT8D2	glycosyltransferase 8 domain containing					cadps2	3.71116e-12	-3.2713		P2RX4	8.22099e-07	-2.11014		Mthfd2l	1.56199e-10	3.62318		PTPN13	1.11409e-11	-4.81942		TRIM21	2.63746e-07	2.29075
GMPR2	guanosine monophosphate reductase 2					cat	1.37659e-06	-2.16563		P2ry6	4.85311e-11	-3.42604		Mxd3	2.39953e-09	-2.28913		PTPRM	1.86165e-09	-2.70295		TRIM22	0.00863659	2.18716
GNAZ	guanine nucleotide binding protein (G p					ccbe1	1.8007e-13	-3.83905		P4ha3	2.64166e-07	-3.70646		Myof	8.4113e-09	-2.21516		PXDN	1.06006e-06	-2.50472		TRIM52	0.000822353	-2.24678
GOLGA2	golgi autoantigen, golgin subfamily a,					ccdc53	7.14699e-09	-2.01229		PAK1IP1	1.46754e-09	2.18016		NADSYN1	2.44276e-10	-3.26581		PYROXD2	8.53398e-10	-5.3851		TRIM6-TRIM34	1.60392e-07	-2.33835
GOLGA8A	golgi autoantigen, golgin subfamily a,					cdc6	2.05858e-12	3.06175		PANX1	6.42105e-10	2.40599		NAMPT	7.93679e-12	5.34449		Papln	7.26329e-05	-2.26385		TRPM4	1.13991e-07	2.21694
GOLGB1	golgin B1, golgi integral membrane prot					cdk5	2.19665e-08	-2.4347		PANX2	6.83946e-08	-2.50426		NAT6	7.06145e-06	-2.06825		Pc	1.14407e-09	-2.21621		TRPS1	1.38067e-12	-2.82632
GOT1	glutamic-oxaloacetic transaminase 1, so					cfd	6.20835e-05	-2.0647		PAQR3	2.11394e-07	2.16507		NAV1	3.89705e-16	-3.45807		Pcdhb18	3.29799e-05	-2.14648		TRPV1	4.37696e-05	-2.73462
GPR124	G protein-coupled receptor 124					cgnl1	4.67704e-06	-2.1194		PAQR7	2.45453e-16	3.38025		NCOA7	1.15604e-12	4.59787		Pcsk1n	5.49803e-05	-2.03527		TSPAN1	1.47597e-07	-2.87186
GPR125	G protein-coupled receptor 125					chrna5	1.44109e-09	2.48171		PAQR8	2.79868e-08	-2.16515		NCRNA00219	4.20601e-09	2.20243		Pdp1	3.17155e-08	2.55876		TSTD1	3.48849e-07	-2.61442
GPR126	G protein-coupled receptor 126					clu	5.32904e-07	2.52283		PARP12	5.16673e-12	2.8062		NEDD1	9.93838e-09	2.06845		Pigw	3.06357e-06	2.89229		TTC3	9.15878e-11	-2.07253
GPR137B	G protein-coupled receptor 137B					crip1	3.38337e-16	19.3136		PAX8	1.59404e-14	-4.1882		NEDD4	1.28723e-08	2.02569		Pkd2	8.92679e-11	-2.59412		TTC32	9.60176e-09	-2.05968
GPR3	G protein-coupled receptor 3					cryz	2.11087e-08	-2.0399		PCDHB10	2.18899e-08	-3.98576		NEIL1	7.49719e-08	-3.82169		Plcb4	1.4532e-06	-2.12939		TUBA1A	8.61773e-08	-2.74882
GPR56	G protein-coupled receptor 56					cxcr7	2.75197e-05	2.66023		PCDHB13	2.7448e-07	-2.49641		NEXN	3.66971e-06	-2.6565		Pld3	2.66649e-09	-2.8934		TUBA4A	1.21216e-12	-2.64576
GPR68	G protein-coupled receptor 68					ddit4	7.5927e-12	-2.60891		PCDHB14	2.01273e-08	-3.60782		NFE2L3	1.7836e-05	2.1649		Pnpt1	3.11837e-08	2.73551		TXNIP	6.30126e-09	-3.64002
GPRC5C	G protein-coupled receptor, family C, g					ddx10	2.13945e-07	2.31367		PCDHB2	0.00115291	-2.08698		NFIL3	8.38738e-10	2.95713		Prr16	4.50316e-06	-3.57423		Taf5	1.37835e-11	2.44144
GPT2	glutamic pyruvate transaminase (alanine					dennd1a	8.92756e-06	-2.10898		PCDHB7	1.56952e-07	-3.53138		NGFRAP1	1.45886e-10	-2.10221		QPCT	9.29345e-12	4.50688		Tceal3	5.36005e-06	-2.15135
GPX4	glutathione peroxidase 4 (phospholipid					dhrs1	5.35131e-09	-2.57273		PCLO	7.41697e-09	-2.21384		NINL	1.07517e-05	-3.14732		QPRT	4.09348e-07	-4.19463		Tcfl5	5.23085e-09	-2.27059
GRAMD3	GRAM domain containing 3					dlx1	2.99132e-06	2.18596		PCMTD1	8.22187e-10	-2.80291		NIP7	1.99283e-07	2.33969		QTRTD1	1.33034e-05	2.26287		Thbs3	1.25851e-05	-2.81628
GRAMD4	GRAM domain containing 4					dtl	7.01391e-09	2.24904		PCOLCE2	1.28074e-05	2.89091		NIPAL3	4.64381e-13	-3.31363		RAD18	1.25192e-07	2.20207		Tmcc1	1.2909e-12	-2.14675
GRAMD4	TSC22 domain family, member 3					dusp5	1.04942e-11	5.7127		PDCD4	4.27736e-11	-3.15327		NIPSNAP1	1.3463e-12	-4.67219		RAD51AP1	1.03714e-07	2.23841		Tmem170b	4.6189e-10	-3.29938
GRB10	growth factor receptor-bound protein 10					dusp6	2.17471e-08	6.45569		PDE12	1.16098e-08	2.23955		NKTR	2.34426e-08	-2.82255		RAGE	2.93927e-09	2.35532		Tmem185b	4.51863e-08	2.34881
GRPEL1	GrpE-like 1, mitochondrial (E. coli)					ech1	9.33052e-08	-2.03649		PDSS1	7.26983e-05	2.24886		NME7	3.7979e-09	-2.43954		RALGPS1	4.19183e-05	-2.35454		Tmem80	4.51816e-08	-2.01431
GRWD1	glutamate-rich WD repeat containing 1					eno2	3.36642e-10	2.19821		PDZK1IP1	1.79176e-05	-6.4499		NOP16	9.46727e-08	2.23982		RARRES2	6.18923e-07	-3.54895		Tmem91	7.33811e-06	-2.44165
GSDMB	gasdermin B					fabp3	7.78152e-06	2.0859		PEG10	2.2002e-16	6.29639		NPHP4	4.90042e-07	-2.03655		RASD2	7.29409e-10	-4.76822		Trim14	4.56816e-10	2.61535
GSTA4	glutathione S-transferase alpha 4					fam172a	5.43907e-08	-2.08853		PEX11G	1.15882e-07	-3.00406		NPNT	5.5187e-14	-19.3249		RASSF2	5.85797e-12	-8.9219		Trip13	2.09203e-10	2.55001
GSTM4	glutathione S-transferase mu 4					fam54a	6.41202e-12	2.47807		PEX2	9.62798e-11	-2.22476		NR2F2	1.98341e-06	-2.44838		RASSF7	9.22941e-08	-2.00582		Tspan2	1.75239e-09	-2.98856
GSTO2	glutathione S-transferase omega 2					fitm2	8.1712e-10	2.62012		PF4V1	1.4933e-10	-5.4175		NRBP2	2.13435e-05	-2.07822		RBKS	1.59427e-11	-2.90827		UBASH3B	4.86689e-10	2.15933
GSTT1	glutathione S-transferase theta 1					foxd1	2.17811e-05	2.19056		PFKL	1.62351e-09	-2.07313		NRM	2.1254e-08	-2.29512		RBM47	3.95724e-10	2.01198		UBIAD1	4.53327e-08	2.18322
GTPBP10	GTP-binding protein 10 (putative)					garnl3	4.1058e-06	-2.58038		PGAP3	1.52309e-08	-2.61872		NT5E	9.89047e-06	2.08258		RBM6	4.78273e-06	-2.28249		ULBP2	3.95132e-08	2.31394
GTSE1	G-2 and S-phase expressed 1					glb1l	8.24996e-09	3.77097		PHF21A	1.88034e-11	-2.87249		NTN4	2.90892e-09	2.57626		RBMS3	1.6449e-07	-3.53987		ULK1	1.27586e-07	-2.4937
GULP1	GULP, engulfment adaptor PTB domain con					gpatch2	7.88189e-11	2.33158		PHLDB1	5.27876e-13	-2.85667		NUDT15	3.75608e-10	2.14497		RBP7	2.22246e-11	5.60863		URB2	9.23156e-11	3.56657
GYS1	glycogen synthase 1 (muscle)					gpatch4	1.96314e-07	2.0536		PHOSPHO2	3.61928e-09	-2.10174		NUDT2	9.45149e-09	-2.13604		RECK	4.37884e-06	-2.38994		Uap1l1	7.97877e-09	2.74613
Gabre	gamma-aminobutyric acid (GABA) A recept					hapln3	2.12957e-07	2.18132		PIK3C2B	1.3431e-08	-2.63214		NUMA1	6.1907e-08	-2.39531		RFC3	5.08107e-14	2.66546		Ube2t	7.66241e-11	2.2773
Galk1	galactokinase 1					hibadh	2.61986e-08	-2.05689		PILRB	0.000186745	-2.64127		NUP35	5.13138e-09	2.20503		RFWD3	1.27432e-10	2.19897		Uchl1	3.00977e-12	9.9725
Gars	glycyl-tRNA synthetase					hmgcL	8.72691e-10	-2.96706		PIM3	3.57438e-12	2.51425		NUP50	4.02119e-12	2.02051		RGS2	1.20584e-08	4.32248		VAV1	1.41056e-08	-2.81575
Gdpd3	glycerophosphodiester phosphodiesterase					hyi	1.15217e-12	3.33431		PINX1	4.64533e-07	2.00433		Nags	8.49758e-15	3.92318		RILPL1	3.89402e-05	-2.07931		VCAN	0.00221253	-2.58977
Gemin8	gem (nuclear organelle) associated prot					ifi30	1.21804e-05	2.02659		PITPNC1	1.08505e-10	2.82477		Nedd4l	1.23565e-10	2.50977		RNF182	0.00245092	2.04431		VEGFA	4.32282e-07	-2.19145
Gins1	GINS complex subunit 1 (Psf1 homolog)					isyna1	2.42375e-11	4.1057		PKIA	0.00124642	-2.33246		Neu1	1.92468e-09	2.8836		RNF212	0.00112121	-2.10285		VEGFC	0.000223869	2.04987
Gins4	GINS complex subunit 4 (Sld5 homolog)					kiaa0895	6.93062e-08	-2.38775		PKMYT1	1.83875e-09	2.34324		Nf2	1.50656e-09	-2.15021		RPGRIP1L	1.01214e-05	-2.40551		VPS37D	2.16018e-08	-2.59083
Glis2	GLIS family zinc finger 2					kiaa1370	1.60864e-08	-2.7741		PLAC8	3.41078e-10	-2.82219		Nfkbie	2.03594e-08	2.10865		RPL22L1	6.25381e-09	2.71223		VRK1	3.55504e-12	2.31062
Gmds	GDP-mannose 4,6-dehydratase					kiaa1524	1.4469e-05	2.14669		PLAT	6.98398e-12	11.9615		Nicn1	3.3662e-08	-2.70702		RPL23AP32	0.00152098	2.1229		WDR19	5.82979e-07	-3.39232
Golga1	golgi autoantigen, golgin subfamily a,					lat	5.98731e-14	9.35555		PLAU	1.56665e-05	2.34564		Nlgn2	2.36252e-08	-2.27209		RPP25	4.48457e-10	3.07095		WDR76	2.1625e-10	2.60479
Golim4	golgi integral membrane protein 4					lbh	3.01885e-07	-3.13854		PLAUR	8.71597e-12	7.57196		Nop56	1.73814e-10	2.31112		RPP40	1.48847e-09	2.70693		WDR77	3.10261e-08	2.12983
Golph3l	golgi phosphoprotein 3-like					lbp	4.72964e-14	-9.59633		PLK1	6.65963e-12	2.14455		Nptx2	2.68959e-07	6.52612		RQCD1	1.83619e-08	2.05306		WIPI1	4.97331e-09	-2.17347
Gpc2	glypican 2					lhpp	2.25325e-12	-7.70866		PLK1S1	1.72008e-07	-2.67267		Nr1d1	1.32063e-12	3.51747		RRBP1	8.94993e-10	-3.4645		WNT5A	0.000106335	2.36142
Gpn3	GPN-loop GTPase 3					lipC	3.19252e-07	-3.69407		PLK4	1.77123e-08	2.30077		OAF	2.57008e-11	2.5935		RRP15	5.63976e-08	2.11712		WSB1	4.94245e-07	-2.69926
Gpr160	G protein-coupled receptor 160					lrig1	0.00193107	2.06273		PLSCR4	2.19627e-07	-2.60359		ODC1	2.37083e-13	6.19332		RRP9	1.18105e-10	2.52445		Wdr25	5.48805e-09	-2.14816
Gprc5a	G protein-coupled receptor, family C, g					macrod2	9.51353e-12	-6.77929		PMAIP1	4.7461e-10	3.08553		OLFML2A	3.35115e-08	-2.69182		RSPH3	2.52103e-07	-2.21498		Wdr60	2.40654e-07	-2.88539
Grb14	growth factor receptor-bound protein 14					2010-03-03	1.73904e-05	2.42329		PMEPA1	7.01947e-12	-5.37891		OLFML3	6.28993e-13	-30.2377		RTTN	3.80213e-08	2.24882		XAF1	3.69359e-08	6.65283
Gripap1	GRIP1 associated protein 1					mest	1.10423e-16	5.10375		PNPLA6	2.23789e-07	-2.3169		ORAOV1	1.48589e-12	3.24625		Rab27a	4.72844e-10	2.47493		XIST	0.000955945	-2.16374
Gsn	gelsolin (amyloidosis, Finnish type)					mfsd3	2.17367e-08	-2.17491		PNRC1	7.10318e-09	-3.30304		ORC6L	4.66435e-09	2.39028		Rapgef3	4.25811e-09	-3.66906		ZC3H12C	8.46005e-08	2.27473
H19	H19, imprinted maternally expressed tra					mgmt	0.000191546	-2.31265		POLE2	2.76693e-14	2.21869		OSBPL2	4.36525e-12	-2.035		Rhobtb1	5.42254e-09	-8.89587		ZFHX4	4.97616e-12	-2.56759
H1f0	H1 histone family, member 0					micB	4.11636e-08	4.09248		POLM	3.42643e-08	2.27104		OSBPL3	6.19719e-12	2.40415		Rnase4	1.3557e-10	-8.68014		ZFP3	1.60532e-07	-2.20966
H6pd	hexose-6-phosphate dehydrogenase (gluco					msrB2	1.08112e-10	-2.16116		POLR3G	7.42336e-10	3.03672		OSBPL9	1.57557e-12	-2.06535		Rnft2	3.45557e-10	2.22488		ZKSCAN1	1.90845e-10	-2.0685
HARBI1	harbinger transposase derived 1					mx1	6.82531e-06	3.32614		PPARA	5.49324e-10	-2.48354		OSGIN1	2.0212e-14	3.68795		Rusc1	2.48544e-12	2.01701		ZNF204P	1.23177e-07	-3.24675
HAS3	hyaluronan synthase 3					nat14	1.82941e-10	-2.70437		PPARG	3.09775e-06	2.24387		OSTM1	1.72077e-06	2.21561		S100P	4.2598e-06	-3.15215		ZNF280D	7.23224e-07	-2.11923
HAUS2	HAUS augmin-like complex, subunit 2					ndrg4	1.77526e-07	2.08753		PPFIBP1	1.4595e-07	2.11245		Oas3	1.51819e-11	5.38015		SAMHD1	1.40285e-10	4.0729		ZNF302	2.73917e-08	-2.05442
HAUS8	HAUS augmin-like complex, subunit 8					nop2	5.95686e-07	2.10263		PPIEL	3.21351e-06	-2.57903		Odz2	1.16495e-07	-8.77418		SATB2	0.000173786	2.06109		ZNF323	1.96922e-11	-3.16259
HBEGF	heparin-binding EGF-like growth factor					npc1	2.40471e-07	2.43561		PPIF	3.17626e-12	3.41306		Osbpl6	8.35157e-08	2.04143		SCFD2	1.41215e-08	2.18943		ZNF350	5.88911e-10	-2.07582
HBP1	HMG-box transcription factor 1					nthl1	1.72659e-06	-2.35861		PPIL5	2.91476e-11	2.37607		Otud1	1.52118e-09	2.24694		SCN2A	4.43725e-11	-4.31765		ZNF362	2.66988e-07	-2.22392
HCFC1R1	host cell factor C1 regulator 1 (XPO1 d					nupr1	2.14655e-05	-2.57135		PPP1R15A	7.97678e-07	2.70359		Oxtr	6.68304e-09	-3.53363		SCRN2	1.00912e-07	-3.02769		ZNF439	2.24618e-05	-2.10525
HCG4	HLA complex group 4					oscp1	6.12555e-10	-2.98955		PQLC3	1.93311e-05	-2.06564		P2ry6	9.95401e-12	-3.81976		SDC2	5.34184e-08	-2.805		ZNF493	0.000639445	-2.00966
HDAC4	histone deacetylase 4					palm	1.99063e-07	-4.5989		PRDM1	1.21918e-06	-2.83791		P4HA1	6.94768e-06	-2.07652		SDCCAG1	1.09045e-07	-2.08412		ZNF512B	3.66764e-09	-2.07315
HGSNAT	heparan-alpha-glucosaminide N-acetyltra					pdcd2l	1.40061e-08	2.07638		PRICKLE1	5.73146e-08	-2.83174		P4HTM	1.61644e-06	-2.13045		SELM	3.47257e-06	2.10086		ZNF610	1.2066e-09	-3.09835
HHLA3	HERV-H LTR-associating 3					pgls	1.23907e-06	-2.01293		PRIM2	1.63032e-06	2.04422		P4ha3	2.78467e-06	-3.0562		SEMA3B	4.71393e-05	-2.78391		ZNF670	1.71681e-05	2.01158
HIBCH	3-hydroxyisobutyryl-Coenzyme A hydrolas					phlda1	4.72902e-08	2.07246		PRKAG2	8.05429e-12	2.43296		PAK1IP1	1.24233e-09	2.19635		SEMA6B	3.09938e-08	-2.00847		ZNF692	9.01371e-06	-2.49122
HIST1H2AL	histone cluster 1, H2ag					phlda2	3.80952e-07	3.29179		PRMT2	1.75335e-09	-2.15224		PAK4	4.61401e-09	-2.08929		SERPINB5	5.3412e-12	6.7957		ZNF697	7.12478e-06	2.41679
HIST1H2BD	histone cluster 1, H2bd					plekha7	1.16862e-10	-2.79186		PSG9	6.31038e-14	7.03724		PANX1	3.01039e-11	2.82374		SFN	1.19883e-07	2.33523		ZNF767	1.29045e-05	-2.94662
HIST1H2BG	histone cluster 1, H2be					pno1	7.67298e-09	2.41215		PSTK	2.12273e-12	3.58887		PAQR3	5.46782e-08	2.31873		SGEF	5.18543e-05	2.29699		ZNF788	1.10098e-07	2.99334
HIST1H2BG	histone cluster 1, H2bf					poc5	4.30526e-07	2.0711		PTGES	3.6346e-10	2.53543		PAQR7	7.76052e-18	4.23494		SGK1	9.41483e-09	2.63841		ZNF789	6.80976e-05	-2.43719
HIST1H2BK	histone cluster 1, H2bk					ppan	4.47753e-10	2.00866		PTGR2	1.14196e-05	-2.67925		PARP12	7.99128e-12	2.74115		SGSH	3.23525e-12	-3.72467		ZNF83	2.17522e-08	-2.74156
HIST1H3H	histone cluster 1, H3g					pprc1	9.91561e-07	2.26187		PTOV1	1.68869e-07	-2.34105		PARP9	2.69703e-06	2.24564		SGSM2	1.54784e-07	-3.02248		ZNF850P	1.54508e-07	3.50076
HIST2H2BE	histone cluster 2, H2be					prpH	7.65428e-08	2.91265		PTPN13	7.61077e-10	-3.4885		PCDHB10	4.77514e-10	-5.61067		SGSM3	9.90895e-07	-2.04993		Zeb2	1.42826e-05	3.30755
HMGA1	high mobility group AT-hook 1					prss23	1.25798e-07	-2.10029		PTPRM	2.42997e-09	-2.6626		PCDHB14	1.8946e-08	-3.6247		SH2B3	4.38645e-07	2.1821		Zmynd8	1.97443e-07	-2.08297
HMGA2	high mobility group AT-hook 2					prss3	1.22448e-09	5.44208		PYROXD2	4.17948e-09	-4.65361		PCDHB16	0.000149965	-2.275		SH3BGRL	3.12321e-08	-2.79267		Znf691	8.84965e-08	-2.09926
HMGCR	3-hydroxy-3-methylglutaryl-Coenzyme A r					rab36	1.5517e-09	-2.25953		Pc	6.5647e-13	-3.28214		PCDHB2	6.14309e-06	-3.2247		SH3GL3	5.30433e-08	-3.17581		Znfx1	7.64284e-09	2.08501
HMGCS1	3-hydroxy-3-methylglutaryl-Coenzyme A s					rab40b	1.82887e-09	-3.53085		Pdp1	1.36577e-09	3.09466		PCNT	0.000114798	-2.15413		SH3RF3	1.55925e-07	3.11983		abhd4	1.07224e-10	-2.4962
HNF1B	HNF1 homeobox B					ripk4	6.46578e-10	-2.46706		Pgcp	7.76809e-07	-2.10447		PCYOX1	5.36536e-06	-2.04708		SHCBP1	5.24338e-08	2.40043		adhfe1	1.27804e-06	-2.29974
HOOK2	hook homolog 2 (Drosophila)					rph3al	2.34749e-11	-4.0026		Pigw	1.28463e-06	3.09131		PDCD4	4.73102e-08	-2.15953		SHF	1.59609e-07	-2.67987		aifm2	1.24754e-14	4.56495
HOXA13	homeobox A13					rrs1	2.48054e-08	2.68256		Pim1	2.24492e-08	2.37152		PDE12	4.5491e-10	2.64033		SHISA2	1.02656e-05	2.02848		anxa4	1.24405e-10	-2.13181
HOXB3	homeobox B3					rtn2	1.73876e-06	-2.49373		Pkd2	1.11046e-12	-3.32955		PDGFA	1.22795e-11	2.05672		SIPA1L2	9.24724e-14	-2.35775		ap1g2	8.56951e-07	-2.9106
HOXB8	homeobox B8					runx3	1.34254e-05	2.27979		Pld3	1.30528e-07	-2.31859		PDGFC	3.48896e-10	-2.00883		SLC10A4	3.21601e-08	6.99628		arsD	4.02078e-11	-3.06401
HOXD9	homeobox D9					sh3yl1	5.04221e-08	-2.06134		Pnpt1	2.97898e-09	3.17738		PDRG1	4.29599e-11	2.16044		SLC12A8	2.03537e-07	2.16051		bdh2	4.47176e-08	-3.61526
HPGD	hydroxyprostaglandin dehydrogenase 15-(					slc22a2	5.6053e-06	-3.10435		Polr2d	7.86784e-10	2.11941		PDXDC1	1.38119e-12	-2.1259		SLC16A5	4.37482e-07	-2.96419		bmp2	8.70844e-08	2.38355
HRH1	histamine receptor H1					slc30a1	1.87946e-07	2.35308		Polr3f	3.28157e-08	2.258		PELI2	4.86068e-08	2.65461		SLC22A1	2.693e-05	3.21536		bysl	5.12833e-10	2.39096
HS1BP3	HCLS1 binding protein 3					slc5a6	6.30927e-11	2.79579		Procr	6.37922e-08	2.07041		PER2	4.07365e-10	2.10862		SLC22A3	0.000743906	-2.17776		c15orf41	5.96419e-11	2.25633
HSD17B11	hydroxysteroid (17-beta) dehydrogenase					smtn	8.40515e-07	2.09973		Prosapip1	7.05783e-11	-2.35656		PEX11B	1.17391e-09	-2.25215		SLC25A33	2.69694e-08	2.20098		c17orf108	9.07126e-09	-4.15612
HSD17B6	hydroxysteroid (17-beta) dehydrogenase					sult4a1	5.83847e-06	2.14611		Prr16	0.000756898	-2.26856		PEX11G	3.849e-05	-2.07256		SLC26A11	2.21867e-07	-2.84082		c20orf108	7.95456e-08	-2.22637
HSD17B8	hydroxysteroid (17-beta) dehydrogenase					sumf1	1.29825e-11	-2.69976		Prss16	3.17902e-08	-3.83448		PF4V1	3.30367e-10	-5.03963		SLC27A1	2.98269e-10	-3.96701		c6orf165	2.70241e-08	-2.41682
HSF2BP	heat shock transcription factor 2 bindi					sycp2	0.000183512	2.70961		QPCT	1.87288e-10	3.59916		PFDN2	1.69208e-09	2.4765		SLC2A10	8.38994e-08	-3.00465		ca12	8.24991e-10	-3.07006
HSPA1B	heat shock 70kDa protein 1B					sytl3	3.88532e-07	2.559		QPRT	1.12493e-10	-10.2502		PFKL	2.61506e-10	-2.24251		SLC31A2	7.31419e-11	3.22236		cdc6	5.54772e-14	3.84742
HSPA5	heat shock 70kDa protein 5 (glucose-reg					tbc1d19	1.60675e-12	-3.09445		QTRTD1	3.19526e-06	2.47835		PHGDH	2.16777e-16	8.69489		SLC35F3	3.97575e-06	2.23557		cenpm	4.51318e-11	2.22111
HTRA1	HtrA serine peptidase 1					tbxa2r	2.76034e-13	4.25699		RAB11B	3.10834e-07	-2.02517		PHKA2	1.50424e-06	-2.1374		SLC3A2	3.3079e-06	2.08337		cfd	3.85421e-05	-2.12639
Hapln4	hyaluronan and proteoglycan link protei					tef	2.47373e-05	-2.17121		RAB32	2.03021e-07	-2.23439		PHLDB1	8.94404e-16	-4.2583		SLC44A3	3.32694e-08	-2.87274		chd3	1.34045e-11	-3.44426
Hcn3	hyperpolarization activated cyclic nucl					tgfbi	2.33361e-10	2.57		RAB38	1.05446e-06	-2.39762		PI3	1.36451e-08	14.6539		SLC48A1	8.42156e-08	-2.00299		cir1	8.35484e-07	-2.26985
Hells	helicase, lymphoid-specific					thrB	1.09732e-14	-5.46063		RAB3B	2.31508e-05	2.02062		PID1	1.16016e-08	3.29315		SLC4A3	3.20485e-06	-2.34663		clic3	1.25375e-05	-3.20521
Hexim1	hexamethylene bis-acetamide inducible 1					tk2	7.16752e-12	-2.56509		RAD18	7.78006e-07	2.01549		PIGZ	5.46515e-08	-3.66327		SLC5A2	6.75466e-10	-2.23306		col12a1	5.68857e-08	-4.05339
Hexim2	hexamthylene bis-acetamide inducible 2					tm7sf2	0.000830221	-2.05372		RAD51AP1	1.68538e-07	2.1845		PILRB	2.3465e-07	-4.9933		SLCO4A1	4.1046e-09	4.43816		crabp2	4.33643e-08	2.84559
Hist1h1a	histone cluster 1, H1a					tmem138	1.63422e-05	2.03194		RAG1	2.20253e-08	3.37018		PIM3	1.03363e-15	4.03723		SMAD3	9.14354e-09	2.06262		crip1	6.01112e-14	9.81888
Hist1h1c	histone cluster 1, H1c					tmem144	4.86472e-07	-2.08239		RAGE	1.57597e-11	3.13642		PINX1	4.05067e-07	2.01699		SMARCA1	3.66586e-10	-2.1099		ctsf	2.08805e-07	-2.27344
Hist1h1d	histone cluster 1, H1d					tmem150a	1.17681e-08	-2.49177		RALGDS	2.90542e-07	-2.03019		PITPNC1	2.40351e-09	2.39524		SMARCD3	9.1948e-07	-2.39114		ddit4	2.6475e-12	-2.75524
Hist1h2ae	histone cluster 1, H2ae					trim2	6.51822e-12	-2.25628		RALGPS1	9.32207e-06	-2.6223		PKIA	3.89241e-06	-4.07825		SNX8	9.53612e-12	3.43678		ddx10	2.93494e-08	2.58426
Hist1h2bh	histone cluster 1, H2bh					tspan15	1.58471e-07	-2.04733		RARRES2	6.70178e-10	-6.78394		PKMYT1	7.67705e-09	2.1901		SOX12	3.11157e-11	-2.91334		ddx39	2.04768e-10	2.08491
Hjurp	Holliday junction recognition protein					ttll1	8.45529e-07	-3.93433		RASSF1	7.35698e-10	2.34007		PLAC8	1.41623e-16	-9.15606		SP110	1.00518e-06	2.53191		dgkA	1.93879e-06	-2.10697
Hk2	hexokinase 2					tuba3c	3.23599e-07	2.18839		RASSF2	2.45908e-10	-5.98796		PLAGL2	1.53095e-13	2.3757		SPATA20	9.43854e-10	-3.28307		dhrs1	3.11436e-10	-3.03557
Hmg20b	high-mobility group 20B					tysnd1	7.88934e-09	-2.11629		RBKS	1.45283e-12	-3.35639		PLAT	8.22902e-12	11.7082		SPATA7	3.63087e-11	-2.11256		dhx58	4.82107e-05	2.41088
Hrct1	histidine rich carboxyl terminus 1					ubl3	1.12937e-08	-2.13678		RBMS3	1.75514e-10	-6.60506		PLAUR	6.4743e-11	6.16291		SPCS3	3.90291e-10	2.31147		dtl	3.61707e-11	2.96854
Hrsp12	heat-responsive protein 12					upp1	4.70187e-12	4.75406		RBP7	1.47133e-11	5.8278		PLCE1	1.54651e-06	-2.59672		SPRY2	2.61065e-12	3.75018		dusp5	1.37371e-11	5.57318
Hspbap1	HSPB (heat shock 27kDa) associated prot					vamp5	2.76461e-07	2.52903		RECK	1.51898e-07	-2.98484		PLCG2	1.0438e-07	2.3698		SPRY4	2.73176e-10	7.39796		dusp6	1.9363e-09	8.5739
Hspg2	heparan sulfate proteoglycan 2					ypel3	1.59159e-07	-3.43274		RFC3	3.51536e-14	2.71515		PLEKHA2	1.84409e-08	-2.05437		SRFBP1	1.63935e-06	2.2715		epcam	1.01713e-10	-2.44959
Htr2b	5-hydroxytryptamine (serotonin) recepto					yrdC	6.06253e-11	2.05839		RFWD3	2.35609e-11	2.37083		PLEKHF1	1.02382e-09	2.49035		SRM	7.12173e-07	2.45424		fam107b	1.15e-12	3.57474
ICAM3	intercellular adhesion molecule 3					zer1	6.60935e-09	-2.04998		RGS2	1.72664e-07	3.46622		PLK1S1	3.54655e-07	-2.5554		SSBP2	5.5445e-10	-3.28671		fam171a1	1.55437e-06	3.15947
ID2	inhibitor of DNA binding 2, dominant ne									RIN1	5.02142e-07	2.07963		PMAIP1	1.06357e-10	3.39906		ST20	5.35724e-06	-3.72633		fam198b	1.85926e-06	-3.572
IDH2	isocitrate dehydrogenase 2 (NADP+), mit									RNASET2	1.90948e-08	-2.02899		PMEPA1	8.69876e-08	-2.68162		ST5	1.05167e-06	-2.15327		fam26f	8.71937e-06	2.09565
IFFO2	intermediate filament family orphan 2									RNF135	5.8829e-10	-2.20494		PMS2L4	5.46053e-08	2.01251		STAMBPL1	2.444e-13	3.57302		fam54a	2.05477e-12	2.62026
IFI27	interferon, alpha-inducible protein 27									RNF182	0.00214306	2.06867		PMVK	7.60211e-07	-2.18616		STARD9	3.49654e-07	-2.92717		foxd1	8.09771e-07	2.70767
IFI35	interferon-induced protein 35									RNF212	6.45513e-05	-2.66256		PNN	3.86651e-10	-3.00135		STAT1	9.82411e-06	2.01356		fucA1	4.87349e-08	-2.14143
IFI44	interferon-induced protein 44									RPGRIP1L	3.93928e-06	-2.5629		PNPLA6	7.86788e-09	-2.80588		STEAP1	1.92523e-10	9.60692		gbp5	0.000319634	2.75499
IFI6	interferon, alpha-inducible protein 6									RPL22L1	4.1899e-10	3.20221		POLR3G	6.85465e-07	2.08356		STIL	4.49681e-11	2.08531		golga4	0.000345673	-2.12594
IFIH1	interferon induced with helicase C doma									RPP25	7.79634e-11	3.43908		POLR3K	5.34293e-07	2.36834		STK36	2.38359e-07	-2.7096		grn	3.21003e-06	-2.19205
IFIT1	interferon-induced protein with tetratr									RPP40	1.65402e-08	2.37631		PON2	2.52141e-11	-3.12035		STX3	9.79608e-12	2.22374		hapln3	6.20442e-08	2.32324
IFT122	intraflagellar transport 122 homolog (C									RQCD1	5.59416e-09	2.16341		POPDC3	5.29598e-07	2.07992		SULF2	3.1159e-10	-5.72455		herc6	3.81346e-09	3.53051
IFT140	intraflagellar transport 140 homolog (C									RRP9	6.61003e-11	2.60051		PPCDC	1.15686e-15	3.59741		SUSD1	8.14133e-12	2.90284		hgd	7.82494e-13	-3.23379
IFT172	intraflagellar transport 172 homolog (C									RSPH3	3.88871e-07	-2.16653		PPIF	3.62058e-12	3.38454		SUSD5	1.24251e-06	3.4211		hlx	6.73982e-08	-2.74428
IFT52	intraflagellar transport 52 homolog (Ch									RWDD2A	2.69283e-10	-2.28388		PPP1R15A	4.93625e-12	7.351		SVIL	3.05566e-08	-2.01403		hmgcL	1.29279e-08	-2.53641
IFT57	intraflagellar transport 57 homolog (Ch									Rapgef3	1.63954e-07	-2.83472		PPP3CC	2.27501e-13	2.49755		Sat1	3e-08	-2.45659		hoxa1	0.00080788	2.12558
IFT74	intraflagellar transport 74 homolog (Ch									Rgl2	4.29602e-10	-2.35659		PQLC2	3.18947e-07	2.06948		Senp5	3.82794e-13	2.11064		hyi	5.2796e-12	3.04107
IFT80	intraflagellar transport 80 homolog (Ch									Rhobtb1	1.50664e-07	-5.96674		PRDM1	3.82448e-06	2.61856		2010-09-06	5.48176e-13	-2.4446		ifit5	4.19845e-07	2.29056
IFT88	intraflagellar transport 88 homolog (Ch									Rnase4	6.6151e-11	-9.46013		PRKAB1	2.19826e-12	2.13617		Sertad1	3.51919e-07	2.16161		igfbp3	9.82854e-05	-2.03042
IGDCC4	immunoglobulin superfamily, DCC subclas									Rnf19b	6.405e-11	2.85793		PRMT2	6.60471e-12	-2.82855		Sfrs5	6.49048e-06	-2.06171		kiaa0895	1.83422e-06	-2.0182
IGFBP1	insulin-like growth factor binding prot									Rnft2	3.98318e-11	2.45914		PRMT3	3.77219e-08	2.40666		Sirpa	4.78073e-06	-2.25142		kiaa1370	3.39117e-10	-3.57279
IGFBP5	insulin-like growth factor binding prot									Rpl10l	1.81002e-06	2.29694		PRNP	1.7592e-10	2.14561		Sirt2	2.37445e-07	-2.10169		kiaa1524	8.8933e-08	2.95785
IL15RA	interleukin 15 receptor, alpha									S100A8	4.30164e-08	-15.9626		PROM2	5.15186e-09	-3.03082		Ska1	5.30142e-08	2.7833		klf6	7.15251e-06	2.15968
IL32	interleukin 32									S100A9	1.65616e-10	-13.2519		PRRX2	1.27304e-09	2.48382		Slc25a25	6.50101e-13	2.55087		lamb2	1.46441e-05	-2.67403
IL6	interleukin 6 (interferon, beta 2)									S100a3	3.62151e-08	2.38009		PSAT1	1.46368e-14	4.89426		Slc25a45	3.17685e-07	-2.17561		lat	5.4527e-11	4.79133
IL6ST	interleukin 6 signal transducer (gp130,									SAMHD1	1.02711e-10	4.17228		PSG4	2.59737e-06	2.8843		Slc3a1	2.09001e-11	-2.9652		lbh	1.443e-10	-6.02152
IL8	interleukin 8									SATB2	4.5157e-05	2.25591		PSG9	4.5655e-14	7.2683		Smo	4.47005e-06	-2.20613		lhpp	2.41199e-10	-4.90528
IMMP2L	IMP2 inner mitochondrial membrane pepti									SC4MOL	1.37523e-12	-2.10962		PTGES	5.96312e-17	8.00046		Snx29	4.56083e-11	-2.31361		llgl2	1.96041e-05	-2.17665
INADL	InaD-like (Drosophila)									SCFD2	6.74375e-09	2.26732		PTMS	1.48823e-07	-2.62856		Sod2	0.00145428	2.341		loxl1	6.1083e-05	-2.20489
INHBA	inhibin, beta A									SCML2	1.53786e-06	2.84298		PTN	1.69156e-06	-2.15309		Sorcs2	6.49628e-10	-3.25014		macrod2	5.01418e-11	-5.76165
INHBE	inhibin, beta E									SCN2A	1.14874e-09	-3.39569		PTOV1	2.97673e-08	-2.57919		Sox4	3.60939e-08	-3.56108		map2k6	3.93727e-07	-3.39133
INO80D	INO80 complex subunit D									SCRN2	1.13702e-08	-3.54436		PTPDC1	1.55838e-09	2.17189		Spint1	8.28137e-05	-2.37077		mapt	3.18215e-09	-2.62794
INPP4B	inositol polyphosphate-4-phosphatase, t									SDC2	8.41339e-06	-2.08252		PTPLAD2	7.29219e-05	-2.55268		Spock1	9.57191e-06	-2.00253		2010-03-03	9.34109e-08	3.56331
INPP5F	inositol polyphosphate-5-phosphatase F									SEMA3B	0.000852275	-2.18129		PTPN13	8.95477e-09	-2.95773		Spsb3	5.84819e-11	-2.38575		mcm2	4.75001e-10	2.26783
INSIG1	insulin induced gene 1									SEMA3C	7.92979e-06	-2.09915		PTRF	8.99436e-08	-2.23482		Steap2	1.69148e-08	2.22717		mest	7.90054e-17	5.24403
INSR	insulin receptor									SEMA6B	1.14917e-08	-2.09621		PYCRL	2.76792e-10	-2.37896		Suv39h1	5.65568e-09	2.19352		mettl1	4.38434e-07	2.175
IPPK	inositol 1,3,4,5,6-pentakisphosphate 2-									SERPINB5	8.15866e-12	6.51401		PYROXD2	2.25336e-10	-6.12984		Sycp3	4.81467e-07	3.00741		micB	1.82741e-11	8.85812
IQCK	IQ motif containing K									SFN	1.10039e-10	3.57359		Pabpc4l	1.92279e-05	-2.1193		Syngr3	4.38198e-06	2.00343		mn1	6.54093e-06	-2.50179
IRAK2	interleukin-1 receptor-associated kinas									SGEF	6.7099e-05	2.25616		Papln	0.000411129	-2.00621		Syt11	0.000229236	2.38054		mx1	1.87495e-13	27.7302
IRF7	interferon regulatory factor 7									SGK1	5.47542e-12	4.32796		Pdcd11	8.6739e-09	2.34501		Syt7	1.06137e-07	-3.05362		nat14	9.35843e-11	-2.80666
IRF9	interferon regulatory factor 9									SGOL2	3.02175e-06	2.12002		Pdp1	1.62685e-12	5.08263		TAF4B	5.10546e-12	2.87192		ncapd3	1.64564e-09	2.19993
IRS1	insulin receptor substrate 1									SGSH	4.84742e-12	-3.62326		Phkb	5.15305e-17	-3.50143		TBCK	3.84032e-10	-2.05816		nme3	2.35473e-06	-2.16102
ISG15	ISG15 ubiquitin-like modifier									SGSM2	1.98593e-07	-2.97017		Pim1	9.57692e-13	4.50069		TCAM1P	0.00225767	2.1184		nptxr	7.94727e-11	-4.01915
ISL2	ISL LIM homeobox 2									SGSM3	5.4511e-07	-2.11105		Pkd2	8.93637e-10	-2.3146		TCEAL4	1.76212e-10	-2.10349		nrcam	5.85545e-07	-3.09849
ITFG3	integrin alpha FG-GAP repeat containing									SH2B3	2.82963e-07	2.23214		Pld3	1.16294e-06	-2.07194		TCF19	3.81123e-09	2.28246		nupl1	7.66361e-08	2.12487
ITGB2	integrin, beta 2 (complement component									SH3BGRL	1.06512e-09	-3.49452		Pltp	1.72032e-07	2.32569		TCTEX1D2	2.64119e-10	-2.33921		nupr1	3.02008e-09	-5.43593
ITPR1	inositol 1,4,5-triphosphate receptor, t									SH3GL3	1.05394e-08	-3.57473		Pnpt1	1.25026e-07	2.51791		TCTN1	6.23513e-09	-2.74503		oscp1	8.27181e-10	-2.93534
ITPRIP	inositol 1,4,5-triphosphate receptor in									SH3RF3	7.6343e-07	2.78885		Polr3d	2.39962e-07	2.00701		TENC1	2.6339e-07	-2.5064		palm	3.60455e-08	-5.46128
IVNS1ABP	influenza virus NS1A binding protein									SHCBP1	2.09177e-08	2.52438		Polr3f	4.37645e-08	2.22618		TFAP2A	1.93574e-11	-2.08552		pan2	1.30432e-05	-2.49417
Id3	inhibitor of DNA binding 3, dominant ne									SHF	1.04e-06	-2.39052		Polr3gl	7.14409e-06	-2.05375		TFEB	1.00733e-10	-2.17616		pdcd2l	1.34982e-08	2.07972
Ier5l	immediate early response 5-like									SIDT2	1.49156e-11	-3.01648		QARS	4.56924e-12	-2.56264		THAP10	4.51141e-09	2.67908		phf19	8.54505e-10	2.60069
Ifit2	interferon-induced protein with tetratr									SIPA1L2	1.25455e-17	-3.80535		QPCT	1.73217e-11	4.29151		TIMM10	1.97746e-08	2.05501		phlda1	5.87748e-11	2.91112
Ifit3	interferon-induced protein with tetratr									SIRT3	1.16647e-09	-2.42532		QPRT	1.26707e-12	-19.1745		TIMM8A	8.43956e-07	2.63432		phlda2	2.32838e-05	2.42882
Ifitm1	interferon induced transmembrane protei									SIRT5	2.03382e-09	-2.28214		RAB3IL1	1.76562e-08	2.20875		TINAGL1	1.71337e-13	4.22783		plekha7	9.92723e-11	-2.81758
Ifne	interferon, epsilon									SLC10A4	1.21418e-07	6.00021		RABL5	2.34575e-10	-2.54149		TIPARP	3.30103e-09	2.81887		plscr1	3.92119e-11	3.69869
Ifrd2	interferon-related developmental regula									SLC16A5	2.16179e-07	-3.11921		RAE1	2.75421e-13	2.14215		TIPIN	2.27688e-13	2.70012		pno1	1.95066e-09	2.59394
Igfn1	immunoglobulin-like and fibronectin typ									SLC1A5	6.15541e-08	2.135		RAG1	1.69879e-10	4.97849		TJP2	3.03634e-08	2.45054		pola2	8.03124e-11	2.40366
Il20rb	interleukin 20 receptor beta									SLC22A1	2.2442e-05	3.27085		RAP1GAP2	6.17159e-07	2.2356		TLE2	0.000715669	-2.11861		poli	8.38577e-06	-2.00704
Impa2	inositol(myo)-1(or 4)-monophosphatase 2									SLC22A3	1.14356e-05	-3.08672		RARRES2	4.4543e-10	-7.0904		TMEM101	1.2759e-18	11.0374		ppl	5.82194e-10	-4.6676
Ing4	inhibitor of growth family, member 4									SLC25A33	6.9345e-09	2.35215		RASD2	3.05265e-08	-3.51413		TMEM158	5.43991e-07	3.56184		ppp1r13l	2.42364e-11	-2.60018
Irf1	interferon regulatory factor 1									SLC26A11	2.20689e-06	-2.44724		RASSF1	1.11397e-13	3.88258		TMEM187	4.485e-07	-2.52131		proS1	7.43944e-09	-3.44319
JDP2	Jun dimerization protein 2									SLC27A1	7.68781e-11	-4.41163		RASSF2	6.5287e-11	-6.85		TMEM194A	1.15367e-10	2.5313		prss23	5.36258e-09	-2.45534
JUP	junction plakoglobin									SLC2A10	1.36009e-09	-4.07473		RBKS	3.51794e-11	-2.78241		TMEM201	6.28713e-08	2.13818		prss3	1.54112e-11	8.6097
Jhdm1d	jumonji C domain containing histone dem									SLC31A2	3.67887e-10	2.91804		RBM47	2.38214e-11	2.25858		TMEM22	1.02677e-06	2.52515		psmb9	4.14148e-07	2.30745
KBTBD3	kelch repeat and BTB (POZ) domain conta									SLC44A3	1.7737e-07	-2.58781		RBM6	9.02019e-08	-2.93671		TMEM47	6.0765e-13	-7.75354		rab31	1.12318e-09	2.8132
KCNMB4	potassium large conductance calcium-act									SLC5A2	7.55299e-11	-2.47556		RBMS3	1.13366e-08	-4.43459		TMEM51	2.53801e-08	2.18512		rab40b	1.30525e-09	-3.61818
KCTD1	potassium channel tetramerisation domai									SLC7A11	1.21311e-05	-2.10281		RBP7	5.86605e-14	10.4577		TMEM8B	1.10384e-08	-2.13988		rad51	4.66869e-10	2.03122
KCTD21	potassium channel tetramerisation domai									SLCO4A1	1.36406e-07	3.33992		RCAN1	1.5126e-08	2.31093		TMSB15B	8.18434e-08	2.80507		rasgrp3	0.000240028	2.1584
KCTD5	potassium channel tetramerisation domai									SMAD3	1.30075e-09	2.24863		RECK	2.89277e-08	-3.36022		TMSB15B	0.000564535	2.30007		rbm24	0.000135623	2.20311
KDM4B	lysine (K)-specific demethylase 4B									SMARCA1	1.76514e-10	-2.17574		RFWD3	5.74412e-11	2.277		TNC	0.000998817	2.18495		rph3al	5.09959e-11	-3.7823
KDM5B	lysine (K)-specific demethylase 5B									SMURF2	1.50994e-06	2.12442		RGS2	6.87558e-06	2.62744		TNFSF10	0.000803327	-3.51159		rrs1	3.40484e-08	2.63269
KIAA0146	KIAA0146									SNORA72	0.000352742	2.23196		RNASET2	1.8489e-09	-2.25012		TNNT1	2.67817e-06	-2.51256		rtn2	9.93157e-08	-3.01421
KIAA0182	KIAA0182									SNX8	5.41891e-09	2.38574		RNF135	5.44249e-09	-2.00662		TNRC6B	3.35053e-10	-2.11689		runx3	7.06739e-07	2.76564
KIAA0319L	KIAA0319-like									SOX12	2.41644e-11	-2.95613		RNF182	0.00303489	2.00599		TNS3	1.33814e-12	-3.40981		sfrs18	9.08928e-07	-2.13029
KIAA0513	KIAA0513									SP110	3.1182e-07	2.72952		RNF212	1.16117e-05	-3.07783		TPD52L1	3.10854e-13	-5.94798		sgms1	1.29171e-06	2.25393
KIAA0586	KIAA0586									SPAG16	8.7739e-09	-2.15759		RP9P	3.20312e-08	2.0315		TRHDE	0.00154605	2.04553		sh3yl1	6.46115e-11	-2.88464
KIAA0895L	KIAA0895-like									SPATA20	4.85057e-09	-2.95198		RPL22L1	1.03081e-10	3.5156		TRIB3	3.68794e-09	2.37442		ska3	1.70918e-10	2.36786
KIAA1009	KIAA1009									SPATA7	6.61098e-11	-2.06289		RPP25	5.6538e-13	4.96381		TRIM21	9.05974e-07	2.14668		slc30a1	2.07925e-07	2.34013
KIAA1024	KIAA1024									SPCS3	4.5855e-11	2.56508		RPP40	5.19718e-08	2.24227		TRIM52	0.000868055	-2.23623		slc5a6	1.23908e-08	2.14496
KIAA1462	KIAA1462									SPHAR	3.8741e-07	-2.13682		RPRML	2.13179e-08	2.71994		TRIM6-TRIM34	3.2388e-10	-3.40242		spc25	8.4835e-07	2.15705
KIAA1467	KIAA1467									SPP1	0.000135927	-4.25615		RRAGC	4.06021e-12	2.39623		TRPM4	2.32435e-10	3.13885		st3gal5	9.71383e-07	2.3124
KIAA1522	KIAA1522									SPRY2	1.88304e-13	4.54582		RRBP1	4.89562e-08	-2.67139		TRPS1	3.43152e-13	-3.05403		sumf1	2.34734e-09	-2.10911
KIF12	kinesin family member 12									SPRY4	7.39633e-11	8.58087		RRN3	8.91844e-12	2.59961		TRPV1	6.44459e-06	-3.21664		sytl3	5.12978e-09	3.40801
KIF15	kinesin family member 15									SRFBP1	3.31804e-07	2.49275		RRP9	9.59396e-10	2.28071		TSPAN1	5.30147e-10	-4.35723		tap1	8.08511e-06	2.03569
KIF16B	kinesin family member 16B									SRM	7.73777e-07	2.44203		Rab27a	4.4005e-09	2.22182		TSTD1	1.05022e-05	-2.13204		tbc1d19	5.16758e-12	-2.89401
KIF23	kinesin family member 23									SSBP2	5.85247e-10	-3.27493		Rabgap1l	2.25091e-11	-3.00081		TTC25	4.57492e-07	-2.72904		tbx15	6.04883e-07	-2.06275
KIF9	kinesin family member 9									ST20	0.000235433	-2.61969		Rapgef3	1.1756e-09	-4.05267		TTC3	4.67393e-13	-2.61953		tbxa2r	1.88958e-09	2.46345
KIFC1	kinesin family member C1									ST5	2.59156e-09	-3.04274		Rbp1	5.79937e-07	3.52378		TTC32	3.18867e-09	-2.16091		thbs2	1.97647e-10	10.2428
KIFC2	kinesin family member C2									ST6GALNAC6	4.7932e-09	-2.05561		Rdm1	2.76672e-05	-2.2084		TTC37	2.06883e-09	-2.04784		thoc4	1.23355e-06	2.4924
KIT	v-kit Hardy-Zuckerman 4 feline sarcoma									STAMBPL1	1.1086e-13	3.76565		Rftn1	0.00479832	2.01097		TUBA1A	1.58344e-07	-2.64621		thrB	4.88659e-15	-5.85842
KLF10	Kruppel-like factor 10									STAU2	8.098e-09	-2.08643		Rgl2	5.01381e-10	-2.33934		TUBA4A	3.96272e-12	-2.49588		tmem150a	1.27944e-09	-2.82415
KLF9	Kruppel-like factor 9									STEAP1	1.97201e-07	4.50472		Rhobtb1	5.22011e-08	-6.74355		TXNIP	1.32622e-06	-2.51637		trim2	7.20959e-14	-2.79296
KLHDC3	kelch domain containing 3									STIL	6.21595e-12	2.26285		Rhof	2.46686e-09	2.65932		TXNRD2	7.34413e-07	2.038		tspan15	1.31283e-08	-2.30473
KLHDC8B	kelch domain containing 8B									STK36	2.21176e-06	-2.35902		Ribc2	6.84279e-07	-2.38384		Taf1a	1.05128e-05	2.10385		ttc14	6.57027e-05	-2.0693
KLHDC9	kelch domain containing 9									SULF2	6.54884e-09	-4.33819		Riok3	6.33722e-15	2.06412		Taf5	6.45557e-12	2.53237		ttll1	5.33765e-06	-3.33192
KLHL24	kelch-like 24 (Drosophila)									SUOX	8.09861e-11	-2.28529		Rnase4	7.10579e-11	-9.37823		Tceal3	8.34644e-07	-2.39387		tuba3c	1.71991e-06	2.01374
KLHL29	kelch-like 29 (Drosophila)									SUSD1	1.94892e-12	3.15415		Rnf19b	8.2584e-14	4.42457		Tcf7l2	1.40566e-10	-2.1677		ubl3	7.67739e-11	-2.73626
KNTC1	kinetochore associated 1									SUSD5	6.40899e-05	2.49029		Rnft2	2.15754e-11	2.5342		Tcfl5	1.42682e-09	-2.41968		upp1	1.4172e-11	4.35223
KRCC1	lysine-rich coiled-coil 1									SYTL2	1.45402e-09	-2.80421		Rpl10l	1.15242e-05	2.06843		Thbs3	1.81503e-06	-3.29523		vamp5	7.24251e-08	2.74589
KRT80	keratin 80									Sat1	6.78473e-07	-2.09009		Rragd	3.6318e-06	2.60199		Tmem170b	1.13783e-09	-3.11068		vldlr	6.03225e-06	-2.7903
KRT81	keratin 81									Senp5	6.48816e-17	3.17286		Rtf1	1.04156e-08	-2.00061		Tmem185b	1.10773e-08	2.53293		wdr4	5.00422e-10	2.44834
KRT86	keratin 86									Sertad1	1.55619e-08	2.55011		S100A5	5.40837e-07	-2.303		Tmem41a	5.0853e-10	2.00821		ypel3	1.46508e-09	-5.11828
Kbtbd11	kelch repeat and BTB (POZ) domain conta									Sh3bgr	1.55881e-09	-2.33102		S100A8	6.03821e-11	-56.4062		Tmem48	1.251e-09	2.26424		yrdC	6.07501e-11	2.05822
Kctd13	potassium channel tetramerisation domai									Sirpa	5.04596e-07	-2.58152		S100A9	2.28236e-10	-12.6668		Tmem91	1.73999e-05	-2.30671		zbtb46	2.58637e-05	-2.13136
Kctd18	potassium channel tetramerisation domai									Sirt2	9.77812e-08	-2.19422		S100P	6.5642e-12	12.8018		Tmtc4	1.18551e-07	-2.11301
Kdelc1	KDEL (Lys-Asp-Glu-Leu) containing 1									Ska1	1.13014e-08	3.07641		S100a4	3.91721e-07	-2.46713		Tox	0.000252125	-2.09274
Kif20b	kinesin family member 20B									Slc22a18	2.82306e-05	-2.17308		SAMHD1	1.1517e-07	2.58595		Tppp3	2.24514e-05	2.0405
Kif21b	kinesin family member 21B									Slc25a25	3.40131e-13	2.63322		SAPS2	8.26413e-07	-2.07699		Trim14	1.1032e-08	2.22774
Klf4	Kruppel-like factor 4 (gut)									Slc25a45	2.1795e-08	-2.50667		SC4MOL	2.78135e-12	-2.05361		Trim35	1.91004e-09	2.10513
Klf5	Kruppel-like factor 5 (intestinal)									Slc26a2	4.43351e-06	-2.30313		SC5DL	5.01101e-08	-2.06315		Trim65	4.49026e-07	-2.01947
Klhl22	kelch-like 22 (Drosophila)									Slc39a11	3.2018e-07	-2.05069		SCARNA13	7.14124e-06	-3.91162		Trip13	9.64846e-11	2.65539
Klhl35	kelch-like 35 (Drosophila)									Slc3a1	1.26588e-11	-3.05371		SCN2A	4.09521e-09	-3.11652		Tspan2	2.50517e-12	-4.77093
Krt7	keratin 7									Slpi	1.45492e-11	-11.9576		SCO2	2.12591e-07	2.0547		Ttyh3	1.46897e-09	-2.17466
Ktn1	kinectin 1 (kinesin receptor)									Smo	1.66275e-06	-2.33669		SCP2	8.05481e-08	-2.02492		UBASH3B	5.38795e-11	2.38345
Kynu	kynureninase (L-kynurenine hydrolase)									Snx29	2.50705e-11	-2.37787		SCRN2	7.66952e-09	-3.65132		UBIAD1	1.14656e-09	2.63554
L1cam	L1 cell adhesion molecule									Sorcs2	1.30377e-11	-4.29838		SDC2	3.73582e-07	-2.48847		UGCG	4.15263e-10	2.08219
LACTB2	lactamase, beta 2									Sox4	7.01739e-10	-4.94364		SDCCAG1	1.61523e-08	-2.28293		ULBP2	5.71835e-11	3.38207
LAMA5	laminin, alpha 5									Spock1	2.16569e-07	-2.46645		SEC24D	6.71836e-09	-2.68709		ULK1	3.18216e-09	-3.13015
LAMC2	laminin, gamma 2									Spsb3	3.02203e-12	-2.76714		SELM	5.31948e-08	2.6603		URB2	3.61473e-11	3.81037
LAP3	leucine aminopeptidase 3									Ssh3	1.6062e-07	-2.42206		SEMA3B	7.2735e-05	-2.68313		UTP15	2.48756e-07	2.07976
LARP7	La ribonucleoprotein domain family, mem									Sycp3	1.82838e-08	3.86473		SEMA3C	3.81752e-07	-2.49973		Uap1l1	2.08932e-09	2.97956
LCAT	lecithin-cholesterol acyltransferase									Syngr3	4.33089e-06	2.00461		SEMA6B	4.41629e-09	-2.18764		Ube2t	2.8475e-10	2.15095
LENG8	leukocyte receptor cluster (LRC) member									Syt11	9.19527e-06	3.11183		SERINC2	8.48172e-10	2.25812		Uchl1	6.42361e-13	12.0861
LETM2	leucine zipper-EF-hand containing trans									Syt7	4.32157e-07	-2.77319		SERPINB5	2.53506e-08	3.30206		VAV1	9.30487e-09	-2.88946
LFNG	LFNG O-fucosylpeptide 3-beta-N-acetylgl									TAF4B	3.09213e-13	3.38848		SERPINE1	0.00222848	2.06594		VCAN	5.53664e-05	-3.95379
LGR4	leucine-rich repeat-containing G protei									TBC1D22A	2.79623e-09	-2.69457		SESN2	3.96039e-14	5.15262		VEGFC	3.67648e-05	2.31825
LHFPL2	lipoma HMGIC fusion partner-like 2									TBCK	2.48804e-11	-2.31135		SFN	2.85651e-10	3.34877		VPS37D	3.05125e-08	-2.54039
LIAS	lipoic acid synthetase									TCAM1P	0.000238314	2.5973		SFRS14	7.5843e-07	-2.49612		VPS39	1.89632e-10	-2.02904
LIF	leukemia inhibitory factor (cholinergic									TCEA3	7.85686e-06	2.87229		SFXN2	1.07072e-08	-2.32635		VRK1	2.95994e-12	2.32935
LIMA1	LIM domain and actin binding 1									TCF25	5.25306e-11	-2.17321		SFXN3	5.28054e-12	-2.48215		WDR19	8.46999e-08	-3.98696
LIN54	lin-54 homolog (C. elegans)									TCF4	1.70592e-12	-3.76125		SGK1	9.78062e-11	3.51049		WDR76	1.59066e-09	2.3543
LIN9	lin-9 homolog (C. elegans)									TCN2	1.98831e-05	2.19587		SGSH	2.07886e-09	-2.52106		WDR77	1.84202e-09	2.44129
LMBRD1	LMBR1 domain containing 1									TCTEX1D2	2.18674e-12	-2.99985		SGSM2	2.87833e-08	-3.41348		WDR91	7.53587e-08	-2.33964
LNPEP	leucyl/cystinyl aminopeptidase									TCTN1	2.13552e-10	-3.39532		SGSM3	4.32099e-08	-2.4061		WFDC2	3.96013e-06	2.44185
LOC100128191	hypothetical protein LOC100128191									TFAM	1.38554e-08	2.15683		SH3BGRL	1.22178e-10	-4.09997		WIPI1	2.71655e-09	-2.23435
LOC100128265	ankyrin repeat domain 11									TFAP2A	1.11277e-11	-2.13184		SH3BP5L	6.01783e-11	-2.24176		WNT5A	1.12538e-05	2.80824
LOC100128288	hypothetical protein LOC100128288									TGFB2	3.22592e-05	-2.01215		SH3GL3	4.85814e-09	-3.79271		WSB1	2.24868e-06	-2.44881
LOC100129502	hypothetical protein LOC100129502									THOC6	2.60688e-06	-2.0626		SH3PXD2A	1.9584e-14	2.69398		Wdr25	1.39617e-08	-2.06203
LOC100130776	hypothetical LOC100130776									TIMM8A	5.37361e-05	2.03479		SH3RF3	1.55796e-09	4.47753		Wdr60	3.22842e-09	-3.96231
LOC100132308	solute carrier family 29 (nucleoside tr									TINAGL1	4.15286e-13	3.96572		SHF	4.77505e-06	-2.18787		XAF1	1.63131e-06	4.40568
LOC100133690	activated leukocyte cell adhesion molec									TIPARP	8.24178e-08	2.35085		SHROOM3	2.6688e-11	-2.03435		YBX2	3.35854e-05	-3.01015
LOC100134189	mediator complex subunit 27									TIPIN	2.45017e-13	2.69007		SIAH1	4.27467e-12	2.15028		ZC3H12A	0.00296288	2.15212
LOC147670	hypothetical protein LOC147670									TJP2	1.49712e-09	2.91328		SIDT2	4.04852e-11	-2.84811		ZC3H12C	1.39289e-10	3.29369
LOC151534	hypothetical LOC151534									TMEM101	5.15544e-19	12.2993		SLC10A4	3.97818e-09	9.04264		ZCCHC11	9.2177e-08	-2.42261
LOC158257	hypothetical protein LOC158257									TMEM120A	4.46371e-08	-2.03712		SLC11A2	6.82749e-07	2.31861		ZFAND2A	1.12798e-09	2.04389
LOC158376	hypothetical LOC158376									TMEM133	5.21837e-08	-2.11194		SLC12A8	4.6612e-12	4.12384		ZFP82	4.9491e-09	2.33909
LOC202781	hypothetical protein LOC202781									TMEM17	2.56449e-06	-2.07903		SLC16A5	5.94536e-05	-2.13037		ZHX2	2.65749e-11	-2.19624
LOC220077	docking protein 1, 62kDa (downstream of									TMEM170A	7.92432e-12	2.41573		SLC1A5	3.54908e-11	3.19474		ZKSCAN1	4.01977e-12	-2.44481
LOC221710	hypothetical protein LOC221710									TMEM187	1.48236e-09	-3.70005		SLC22A1	0.00266685	2.10563		ZMYM3	5.03499e-12	-2.95755
LOC284023	hypothetical protein LOC284023									TMEM194A	3.33513e-12	3.07157		SLC22A15	1.43824e-12	8.57236		ZNF137	0.0073901	-2.09854
LOC341378	thyroid hormone receptor interactor 11									TMEM22	1.77919e-07	2.8281		SLC25A33	1.0979e-09	2.58825		ZNF200	1.20394e-10	2.02471
LOC375190	hypothetical protein LOC375190									TMEM47	2.25974e-12	-6.77473		SLC27A1	1.06029e-09	-3.61005		ZNF239	3.24178e-06	2.28285
LOC375295	hypothetical protein LOC375295									TMEM8B	9.55745e-11	-2.70536		SLC2A10	1.33936e-05	-2.17446		ZNF25	3.9251e-09	-2.01283
LOC377711	HEAT repeat containing 7A									TMSB15B	7.62989e-07	2.44199		SLC31A1	1.51838e-10	2.15156		ZNF251	1.17765e-08	-2.08664
LOC388796	hypothetical LOC388796									TNFRSF10A	1.91054e-09	2.51015		SLC31A2	1.15926e-11	3.63852		ZNF257	4.36354e-07	2.29684
LOC389458	hypothetical LOC389458									TNFSF10	6.46213e-05	-4.93098		SLC35F3	1.17546e-05	2.10082		ZNF259	5.05434e-11	2.17064
LOC390834	fem-1 homolog a (C. elegans)									TNRC6B	3.90223e-10	-2.10356		SLC37A4	7.28023e-09	-2.04232		ZNF267	2.63956e-09	2.43144
LOC390940	similar to R28379_1									TNS3	8.16782e-15	-4.9082		SLC38A1	2.26228e-14	3.07597		ZNF302	1.38809e-08	-2.11695
LOC401097	Similar to LOC166075									TPD52L1	2.78677e-13	-6.00793		SLC38A6	1.05146e-08	-2.60712		ZNF320	1.12772e-06	-2.06007
LOC401321	hypothetical LOC401321									TRAF6	3.25553e-06	2.05623		SLC3A2	5.6141e-11	4.16782		ZNF323	7.08213e-13	-3.93869
LOC404266	hypothetical LOC404266									TRHDE	0.00147814	2.05317		SLC44A3	1.33366e-08	-3.04927		ZNF337	1.49739e-06	-2.11718
LOC440311	glioma tumor suppressor candidate regio									TRIM13	2.51523e-07	-2.28298		SLC7A1	1.11147e-09	2.16391		ZNF362	2.13426e-09	-2.91725
LOC442075	hypothetical LOC442075									TRIM21	6.17197e-08	2.48084		SLC7A5	1.48426e-11	2.75858		ZNF418	1.24083e-05	-2.34647
LOC550643	hypothetical LOC550643									TRIM6-TRIM34	1.09941e-07	-2.38689		SLC7A7	1.22867e-06	2.50025		ZNF439	4.00298e-05	-2.03495
LOC642132	roundabout, axon guidance receptor, hom									TRMT6	9.29431e-12	2.3079		SLCO4A1	1.20467e-08	4.05148		ZNF497	1.53702e-07	-2.30613
LOC642587	NPC-A-5									TRPM4	7.54401e-10	2.91934		SLFN11	4.61947e-09	-2.76149		ZNF512B	5.18511e-12	-2.84342
LOC642852	hypothetical LOC642852									TRPS1	3.39029e-15	-4.09785		SMARCA1	9.70505e-11	-2.23269		ZNF570	7.45272e-06	2.82974
LOC643072	hypothetical LOC643072									TSHZ1	0.0005288	-2.04468		SMPD1	1.22604e-09	-2.28277		ZNF580	9.56557e-08	-2.13692
LOC643988	hypothetical LOC643988									TSPAN1	1.11322e-12	-7.75542		SNHG1	1.94516e-08	2.17948		ZNF610	1.04125e-06	-2.11011
LOC644504	chondroitin sulfate N-acetylgalactosami									TSPAN12	1.36252e-07	-2.02749		SNHG5	4.42267e-13	2.30338		ZNF629	5.33738e-09	-2.22933
LOC644754	bolA homolog 3 (E. coli)									TTC25	9.53345e-07	-2.6009		SNHG8	6.3915e-14	4.9098		ZNF652	6.90507e-06	-2.17744
LOC644877	calcyclin binding protein									TTC3	8.70223e-14	-2.85631		SNORA61	0.00158268	-2.17849		ZNF670	1.32654e-07	2.66573
LOC645166	lymphocyte-specific protein 1 pseudogen									TTC8	4.03748e-09	-2.23703		SNRNP70	4.13605e-16	-3.11801		ZNF692	3.2277e-06	-2.6755
LOC645638	similar to WDNM1-like protein									TWIST2	0.000290774	-2.04257		SNX14	6.09984e-10	-2.24973		ZNF697	1.42498e-07	3.16617
LOC645984	hypothetical LOC645984									TXNIP	9.94312e-09	-3.51772		SNX24	1.14763e-11	2.14314		ZNF767	0.000116968	-2.46231
LOC653155	PRP4 pre-mRNA processing factor 4 homol									Taf1a	8.38071e-06	2.131		SNX8	2.48434e-11	3.23234		ZNF788	4.49321e-08	3.18719
LOC653506	meteorin, glial cell differentiation re									Taf5	3.30592e-12	2.618		SOCS6	3.68919e-11	2.73443		ZNF789	0.000136886	-2.31144
LOC653877	UTP20, small subunit (SSU) processome c									Tceal3	7.08761e-07	-2.41707		SOX12	6.1465e-08	-2.00051		ZNF83	2.04884e-09	-3.18435
LOC727803	RAN binding protein 1									Tcfl5	1.39417e-11	-3.1228		SPAG1	1.80619e-06	2.0312		ZNF850P	1.17999e-06	2.99212
LOC728431	hypothetical LOC728431									Thnsl1	2.27589e-09	-2.52445		SPATA20	3.94338e-07	-2.28423		Zc4h2	4.14123e-08	-2.4482
LOC728485	hypothetical protein LOC728485									Tmcc1	1.53648e-15	-2.93032		SPATA7	1.10503e-12	-2.45754		Zeb2	2.85078e-06	3.84836
LOC729013	hypothetical protein LOC729013									Tmem134	2.21936e-10	-2.36477		SPG7	4.46932e-06	-2.20338		Zfc3h1	2.32496e-07	-2.38838
LOC729162	similar to Serine/threonine-protein kin									Tmem170b	4.74458e-09	-2.84529		SPHAR	7.51136e-08	-2.32359		Zmynd8	1.1322e-10	-3.1132
LOC729859	WW domain binding protein 1									Tmem185b	2.94773e-09	2.72928		SPP1	0.00954962	-2.4287		Znf597	2.69748e-05	2.08135
LOC732419	ATPase family, AAA domain containing 3B									Tmem41a	1.76403e-10	2.09448		SPRY2	3.47853e-12	3.677		abcc5	9.94607e-06	-2.12551
LOC732446	growth arrest-specific 6									Tmem48	1.16737e-11	2.87267		SPRY4	8.01412e-10	6.58457		abhd4	9.13974e-10	-2.25332
LOC90462	zinc finger protein 605									Tmem91	3.80734e-05	-2.19251		SRFBP1	2.48541e-07	2.53621		afap1l1	1.61841e-07	2.20115
LOC91316	glucuronidase, beta/ immunoglobulin lam									Tmtc4	1.40538e-09	-2.64958		SRI	2.50163e-08	-2.18446		aifm2	1.95692e-15	5.29092
LONRF1	LON peptidase N-terminal domain and rin									Trim14	8.72252e-10	2.52744		SSBP2	1.5179e-07	-2.34781		akr1c2	0.00141062	-2.14872
LPHN1	latrophilin 1									Trim35	2.71641e-11	2.56314		ST20	7.09278e-07	-4.55064		alpk2	0.000112455	-3.05066
LPHN2	latrophilin 2									Trip13	1.15799e-11	2.98731		STAMBPL1	2.77722e-11	2.70235		anxa4	9.58467e-12	-2.38396
LRIG3	leucine-rich repeats and immunoglobulin									Trpt1	6.39929e-10	-2.40698		STBD1	2.41575e-09	2.21614		ap1g2	8.87892e-08	-3.44736
LRP12	low density lipoprotein-related protein									Tspan2	2.9881e-07	-2.2306		STEAP1	5.93352e-10	8.37823		appl2	1.02704e-08	-2.07936
LRRC17	leucine rich repeat containing 17									Tspan31	8.49757e-12	-2.25298		STEAP3	1.38923e-09	-2.56011		arhgef10	1.1989e-10	-2.18397
LRRC27	leucine rich repeat containing 27									Ttyh3	1.26696e-10	-2.43615		STK10	1.20856e-10	2.3822		arhgef5	1.32481e-11	-2.22802
LRRC37A3	leucine rich repeat containing 37, memb									Tubb2a	4.50725e-09	2.53327		STK16	4.73208e-09	-2.55831		arrdc4	0.000160076	-2.30877
LRRC6	leucine rich repeat containing 6									Txnl4b	1.47991e-10	2.0653		STK17A	2.64921e-08	-2.2352		arsD	5.49618e-11	-3.00721
LRRC8C	leucine rich repeat containing 8 family									Txnrd3	4.26503e-08	-2.31188		STK36	8.95709e-12	-5.98522		as3mt	9.08516e-09	-2.85265
LRRN1	leucine rich repeat neuronal 1									UBASH3B	1.48466e-11	2.5362		STX3	6.50869e-16	3.68892		baiap2l1	1.593e-08	-2.21194
LTBP2	latent transforming growth factor beta									UBE3C	5.42017e-11	2.05883		SULF2	1.44591e-07	-3.37287		bdh2	4.22657e-09	-4.38869
LUC7L	LUC7-like (S. cerevisiae)									UBIAD1	6.77151e-11	3.10557		SUSD1	1.04881e-11	2.86195		bmp2	1.9188e-10	3.45592
LUC7L3	cisplatin resistance-associated overexp									UGCG	2.30547e-10	2.13337		SUSD5	0.000356162	2.18196		bysl	2.17336e-11	2.81704
LUM	lumican									ULBP2	1.45903e-13	5.29128		SYNE1	8.38705e-13	-3.15865		c12orf51	1.53054e-08	-2.2939
LXN	latexin									ULK1	2.22211e-08	-2.76684		SYT16	5.08437e-05	2.14811		c15orf41	9.02578e-10	2.01481
LYAR	Ly1 antibody reactive homolog (mouse)									URB2	4.63175e-11	3.74339		Samm50	2.50087e-12	-2.23006		c17orf108	2.07428e-08	-3.88123
LYPD1	LY6/PLAUR domain containing 1									USP20	1.91409e-08	-2.08737		Senp5	2.96819e-13	2.13148		c1orf107	1.17075e-09	2.13052
LYRM5	LYR motif containing 5									UTP15	3.14939e-07	2.05678		2010-09-06	1.90667e-12	-2.31162		c20orf108	1.09434e-07	-2.19141
Lamb3	laminin, beta 3									Ube2t	7.38232e-10	2.06748		Setd8	5.31234e-15	2.34366		c6orf192	5.11131e-07	-2.16199
Lcn2	lipocalin 2									Ubxn11	0.000163028	-2.01639		Sfrs5	3.72198e-08	-2.77366		ca12	1.00872e-08	-2.64084
Ldlr	low density lipoprotein receptor									Uchl1	6.79508e-13	11.9991		Sh3bgr	4.62004e-13	3.70548		cast	1.25399e-10	-2.19186
Ldoc1	leucine zipper, down-regulated in cance									VAV1	7.07042e-07	-2.2462		Ska1	1.81434e-06	2.25448		ccbe1	4.5156e-11	-2.73802
Leprel2	leprecan-like 2									VCAN	3.21229e-07	-7.4137		Slc25a25	2.53259e-14	3.01964		cdc6	3.78691e-14	3.95008
Lpxn	leupaxin									VEGFC	0.000166582	2.09127		Slc26a2	1.64271e-06	-2.44761		cdk10	4.37362e-07	-2.12781
Lrba	LPS-responsive vesicle trafficking, bea									VPS37D	2.16611e-08	-2.59043		Slc3a1	2.3663e-09	-2.31018		cenpm	7.4218e-11	2.17457
Lrch1	leucine-rich repeats and calponin homol									VPS39	2.07461e-11	-2.22022		Slfn5	9.63641e-08	3.48467		cfd	3.88621e-07	-2.868
Lrrn4	leucine rich repeat neuronal 4									VRK1	4.3589e-12	2.29013		Smo	6.7932e-08	-2.84658		cgnl1	4.08698e-08	-2.79557
Ltbp1	latent transforming growth factor beta									Vamp8	4.99764e-06	2.21949		Snapin	1.69638e-11	-2.96918		chd3	2.42417e-14	-5.54999
Ly6e	lymphocyte antigen 6 complex, locus E									WARS2	8.205e-14	-2.36954		Snx29	1.39503e-12	-2.74185		cir1	1.96309e-08	-2.8284
Lyg1	lysozyme G-like 1									WDR19	4.91806e-08	-4.18034		Sod2	2.33855e-06	4.4366		clic3	6.73855e-08	-5.27974
Lyplal1	lysophospholipase-like 1									WDR77	3.1429e-10	2.6798		Sorcs2	2.19197e-10	-3.49731		col12a1	1.69784e-10	-7.09308
Lztr1	leucine-zipper-like transcription regul									WDTC1	1.0215e-08	-2.25638		Sox4	2.33995e-05	-2.25904		col4a2	3.11518e-06	-2.77738
MAD1L1	MAD1 mitotic arrest deficient-like 1 (y									WIPI1	6.91757e-13	-3.51817		Sptlc2	1.85737e-10	-2.30284		crip1	1.10405e-14	12.0429
MAFG	v-maf musculoaponeurotic fibrosarcoma o									WWTR1	3.97458e-06	2.11886		Steap2	7.48412e-10	2.6091		ctsf	2.80914e-08	-2.53604
MAGEB2	melanoma antigen family B, 2									Wdr25	1.48023e-08	-2.05684		Sycp3	2.02473e-06	2.71477		cxcr7	6.31697e-06	-2.99132
MAGED1	melanoma antigen family D, 1									Wdr60	2.20746e-08	-3.41943		Syngr3	7.87647e-10	3.29471		ddah2	8.30206e-09	-2.63028
MAGED2	melanoma antigen family D, 2									XAF1	9.78687e-08	5.95507		Syt7	2.67931e-07	-2.8643		ddit4	5.87993e-10	-2.13281
MAGEH1	melanoma antigen family H, 1									YPEL2	6.09954e-09	-3.63204		TAF4B	2.65961e-13	3.42073		ddx10	3.84366e-11	3.98902
MAGI2	membrane associated guanylate kinase, W									ZBTB20	1.31934e-06	-2.92127		TAGLN	1.59935e-06	-2.89032		ddx20	1.42004e-10	2.07237
MAGI3	membrane associated guanylate kinase, W									ZBTB22	1.58808e-08	-2.00605		TBC1D8	8.11354e-06	-2.71446		ddx39	9.91208e-11	2.14788
MAK16	MAK16 homolog (S. cerevisiae)									ZC3H12C	3.99377e-08	2.3652		TBCK	7.69931e-10	-2.00233		dgkA	6.42722e-07	-2.23354
MAL	mal, T-cell differentiation protein									ZFAND2A	6.8152e-12	2.57063		TCEA3	4.99761e-08	4.40157		dhrs1	4.45756e-10	-2.96986
MAL2	mal, T-cell differentiation protein 2									ZFHX4	2.42226e-12	-2.66239		TCF25	9.41389e-13	-2.6114		dlx1	5.91369e-06	2.1052
MAN2A1	mannosidase, alpha, class 2A, member 1									ZFP2	4.40045e-07	-2.17283		TCF4	6.74714e-12	-3.43037		dnajc4	6.2845e-09	-2.14614
MAN2B2	mannosidase, alpha, class 2B, member 2									ZFP28	4.5362e-09	2.20521		TCN2	2.18226e-12	7.99376		dock3	3.54195e-06	-2.08157
MANBA	mannosidase, beta A, lysosomal									ZFP82	4.8727e-09	2.34089		TCP1P3	8.86464e-10	-2.15887		dsp	1.46043e-09	-2.45578
MANEAL	mannosidase, endo-alpha-like									ZKSCAN1	1.85918e-11	-2.28054		TCTEX1D2	2.17583e-12	-3.00071		dtl	5.45546e-12	3.33075
MANSC1	MANSC domain containing 1									ZMYM3	2.56348e-11	-2.70384		TCTN1	1.39668e-09	-3.0061		dusp5	2.16104e-12	6.64353
MAP3K1	mitogen-activated protein kinase kinase									ZNF200	2.62303e-12	2.37538		TDRD3	1.14687e-12	-2.08814		dusp6	5.65616e-11	13.652
MAP4	microtubule-associated protein 4									ZNF22	2.70515e-11	2.06258		TENC1	1.11704e-07	-2.63935		epcam	1.86918e-13	-3.48333
MAP9	microtubule-associated protein 9									ZNF239	9.85878e-06	2.13967		TFAP2A	5.0882e-12	-2.20102		fam107b	2.35522e-14	4.73094
MARCKS	myristoylated alanine-rich protein kina									ZNF248	6.81634e-07	-2.56318		TFEB	1.95451e-10	-2.11673		fam171a1	1.22608e-05	2.6917
MARCKSL1	MARCKS-like 1									ZNF25	5.31713e-10	-2.18953		TGDS	3.17051e-07	2.01155		fam172a	1.50089e-08	-2.21717
MASTL	microtubule associated serine/threonine									ZNF256	2.07363e-05	2.23201		TGFB1	3.57608e-09	-2.09014		fam26f	5.80995e-07	2.44848
MATN3	matrilin 3									ZNF257	7.78602e-07	2.22577		THAP10	2.12227e-08	2.45798		fam54a	2.8634e-12	2.57724
MBD5	methyl-CpG binding domain protein 5									ZNF259	2.24579e-12	2.49467		THBD	0.000253672	2.32331		fbxl19	2.48746e-09	-2.15023
MBOAT1	membrane bound O-acyltransferase domain									ZNF267	4.84957e-11	3.0324		TINAGL1	1.38899e-11	3.14823		fitm2	3.46921e-09	2.42798
MBTPS1	membrane-bound transcription factor pep									ZNF280C	1.32221e-08	2.39816		TIPARP	1.86725e-11	3.97315		foxa1	1.47221e-05	-2.28939
MCCC1	methylcrotonoyl-Coenzyme A carboxylase									ZNF323	1.20323e-13	-4.48807		TM4SF1	1.09529e-15	-5.67067		foxd1	9.53083e-08	3.14058
MCFD2	multiple coagulation factor deficiency									ZNF362	1.70618e-09	-2.9577		TMCO6	3.17428e-06	-2.22449		fucA1	1.22416e-07	-2.05244
MCM3	minichromosome maintenance complex comp									ZNF395	4.74444e-11	-2.27265		TMEM101	4.08752e-18	9.66718		gbp5	5.69384e-05	3.26883
MCM4	minichromosome maintenance complex comp									ZNF439	1.06416e-05	-2.20088		TMEM141	1.34294e-06	-2.03143		gcnt3	1.13346e-06	-2.45484
MCM6	minichromosome maintenance complex comp									ZNF470	2.78208e-05	2.0759		TMEM161B	1.45888e-05	2.00318		gfra1	2.92935e-07	-4.46021
MCM8	minichromosome maintenance complex comp									ZNF473	1.30767e-12	2.14567		TMEM194A	5.84178e-09	2.10555		glb1l	7.37296e-05	2.03223
MECOM	ecotropic viral integration site 1									ZNF512B	1.58614e-10	-2.38656		TMEM199	1.64673e-10	2.03021		golga4	2.57286e-07	-3.7298
MED10	mediator complex subunit 10									ZNF570	6.18699e-07	3.45234		TMEM206	1.32261e-09	2.19538		grn	2.16261e-07	-2.56458
MED11	mediator complex subunit 11									ZNF610	4.95178e-08	-2.48146		TMEM22	3.83173e-06	2.32748		gtf2i	6.35931e-07	-2.26634
MED24	mediator complex subunit 24									ZNF652	1.8544e-06	-2.35196		TMEM47	2.5498e-06	-2.32824		hapln3	6.40876e-09	2.62788
MEGF9	multiple EGF-like-domains 9									ZNF670	1.18969e-07	2.68383		TMEM67	1.1253e-06	-2.07013		herc6	2.22535e-09	3.67357
MEIS1	Meis homeobox 1									ZNF697	4.8787e-08	3.42897		TMEM8B	3.0497e-08	-2.04581		hgd	2.26101e-12	-3.03651
METT11D1	methyltransferase 11 domain containing									ZNF76	1.09436e-07	-2.03762		TMOD1	1.62869e-09	2.22832		hlx	3.49775e-07	-2.4822
METTL9	methyltransferase like 9									ZNF767	0.00108219	-2.06087		TMSB15B	1.17085e-05	2.08476		hmgcL	2.68161e-08	-2.43735
MFAP3L	microfibrillar-associated protein 3-lik									ZNF788	7.29443e-09	3.64219		TNC	1.84948e-07	4.73708		hmox1	1.20501e-08	3.06068
MFAP5	microfibrillar associated protein 5									ZNF83	1.88721e-07	-2.41604		TNFAIP8	1.1093e-06	-2.00736		hoxa1	0.00027441	2.31912
MFHAS1	malignant fibrous histiocytoma amplifie									ZNF85	5.80773e-07	2.23957		TNFRSF10A	4.84348e-10	2.70311		hpcal1	5.13952e-09	2.32938
MGC16121	hypothetical protein MGC16121									ZNF850P	1.51247e-07	3.50672		TNFSF10	3.48892e-06	-7.40493		hyi	1.95761e-12	3.2269
MGC4294	hypothetical protein MGC4294									ZSCAN2	5.60138e-09	-2.32064		TNS3	5.50514e-14	-4.2413		ifi30	4.72408e-06	2.13414
MICAL3	microtubule associated monoxygenase, ca									ZWILCH	2.03047e-09	2.00749		TOP2B	9.55949e-10	-2.04995		ifit5	4.33227e-07	2.28664
MICALL1	MICAL-like 1									Zdhhc20	2.58514e-06	2.06868		TPBG	2.2938e-09	2.35648		igfbp3	6.83479e-06	-2.4048
MID1	midline 1 (Opitz/BBB syndrome)									Zeb2	0.000123235	2.7199		TPD52L1	3.68901e-10	-3.40082		kiaa0556	4.15258e-08	-2.3553
MIIP	migration and invasion inhibitory prote									Znf597	3.85796e-07	2.70461		TPM1	1.98362e-11	-2.09489		kiaa0895	5.38742e-07	-2.14505
MINK1	misshapen-like kinase 1 (zebrafish)									Znfx1	1.08448e-09	2.27548		TPPP	2.89427e-07	2.26998		kiaa1370	2.97976e-10	-3.60564
MITF	microphthalmia-associated transcription									abl2	1.139e-07	2.05465		TRIB3	7.9045e-18	11.3971		kiaa1524	1.68197e-07	2.83405
MKI67	antigen identified by monoclonal antibo									afap1l1	1.35087e-07	2.22128		TRIM21	1.18446e-07	2.39253		klhl21	2.71267e-07	2.17413
MKX	mohawk homeobox									aifm2	1.18321e-15	5.51937		TRIM25	8.98558e-09	2.13026		lamb2	9.61319e-07	-3.31095
MLLT3	myeloid/lymphoid or mixed-lineage leuke									akr1c2	7.5571e-07	-4.23299		TRIM36	2.0384e-08	2.64446		lat	5.95351e-13	7.30108
MLLT6	myeloid/lymphoid or mixed-lineage leuke									akr1c3	0.0227169	-2.06056		TRIM52	1.08505e-06	-4.06971		lbh	5.06399e-11	-6.68902
MLX	MAX-like protein X									alpk2	8.0243e-05	-3.15458		TRIM6-TRIM34	1.69174e-13	-6.21509		lhpp	1.1287e-11	-6.52985
MLYCD	malonyl-CoA decarboxylase									alx1	0.000197577	-2.11433		TRPM4	1.08842e-11	3.85537		lipC	1.42436e-05	-2.71794
MMACHC	methylmalonic aciduria (cobalamin defic									anxa4	2.84249e-13	-2.83893		TRPS1	3.18371e-10	-2.17415		llgl2	5.37176e-06	-2.35851
MMD	monocyte to macrophage differentiation-									ap1g2	6.32037e-07	-2.97551		TRPV1	0.000131035	-2.49732		loxl1	1.92331e-06	-2.80088
MMP13	matrix metallopeptidase 13 (collagenase									appl2	1.1304e-10	-2.57267		TSEN15	3.48971e-11	2.21237		lpin1	2.53072e-08	-2.33463
MMP19	matrix metallopeptidase 19									arhgef10	5.82303e-11	-2.25331		TSPAN1	8.50881e-13	-7.98139		lrig1	0.000979093	2.18698
MOCOS	molybdenum cofactor sulfurase									arsD	4.29578e-11	-3.05184		TSPAN12	6.97749e-11	-2.9946		lrp1	1.30829e-08	-2.74308
MON2	MON2 homolog (S. cerevisiae)									as3mt	2.88459e-08	-2.65998		TSPAN13	1.53817e-10	-2.05406		macrod2	2.76986e-13	-9.9822
MORN2	MORN repeat containing 2									ate1	1.85832e-10	2.36444		TSPYL4	2.48129e-08	-2.46928		2010-03-03	5.45681e-09	4.51807
MOSC2	MOCO sulphurase C-terminal domain conta									bag1	3.63557e-12	2.36082		TTC23	8.53673e-07	-2.0428		mcm2	1.21097e-09	2.17472
MOSPD3	motile sperm domain containing 3									bmp2	5.46011e-08	2.44519		TTC3	5.28286e-13	-2.60371		mest	3.39304e-16	4.67416
MOXD1	monooxygenase, DBH-like 1									bysl	3.692e-11	2.73653		TTC30A	1.76561e-09	-3.06608		mettl1	8.51526e-08	2.37038
MPDZ	multiple PDZ domain protein									c10orf140	7.01467e-05	-2.46134		TTC32	1.15779e-08	-2.04336		micB	6.52371e-12	10.0118
MPI	mannose phosphate isomerase									c10orf35	3.53815e-09	2.20857		TTLL5	2.77395e-10	-2.0175		mmp24	1.23573e-09	-2.07396
MPP1	membrane protein, palmitoylated 1, 55kD									c11orf54	4.29113e-09	-2.16643		TUBA1A	2.86084e-06	-2.22888		mn1	3.93705e-07	-3.04841
MPPE1	metallophosphoesterase 1									c17orf108	8.65065e-10	-5.10833		TUBA4A	1.67975e-16	-4.58632		mnt	4.88101e-10	-2.42273
MPV17L	MPV17 mitochondrial membrane protein-li									c18orf19	5.71009e-09	2.15191		TXNRD2	9.13614e-10	2.91464		mri1	1.08002e-10	-2.67107
MRAP2	melanocortin 2 receptor accessory prote									c1orf109	4.50016e-05	2.16836		Taf1a	2.89268e-06	2.26518		mthfd2	2.27032e-07	2.04035
MSH5	mutS homolog 5 (E. coli)									c20orf108	6.22228e-10	-2.89938		Tbcd	5.5118e-13	-2.4236		mustn1	2.30933e-09	2.28087
MSX2	msh homeobox 2									c21orf2	4.27414e-08	-2.23341		Tceal1	2.25029e-11	-2.21344		mx1	4.8336e-13	23.6854
MT1F	metallothionein 1F									c2orf68	6.79371e-09	-2.08356		Tceal3	1.66124e-06	-2.29968		myh10	7.98807e-11	-2.44879
MTBP	Mdm2, transformed 3T3 cell double minut									c4orf33	9.55642e-08	-2.34678		Tcfl5	6.03915e-08	-2.03036		nat14	5.97235e-12	-3.30575
MTERFD3	MTERF domain containing 3									c6orf192	1.69405e-07	-2.28958		Tgif1	1.18452e-09	2.08135		nipbl	2.54199e-09	-2.51285
MTHFSD	methenyltetrahydrofolate synthetase dom									c8orf40	8.55626e-09	-2.46126		Thbs1	6.39698e-07	-4.37836		nisch	2.30655e-06	-2.48151
MTMR9L	myotubularin related protein 9-like									cadps2	1.5947e-08	-2.10701		Thbs3	5.8801e-05	-2.49606		nme3	3.11621e-07	-2.41926
MTP18	mitochondrial protein 18 kDa									cat	2.79453e-06	-2.08633		Tm6sf1	1.34014e-07	2.99384		nptxr	2.84307e-11	-4.35082
MUC1	mucin 1, cell surface associated									ccbe1	2.52065e-13	-3.75187		Tmem170b	5.28282e-11	-3.83581		nrcam	3.11948e-07	-3.25031
MVD	mevalonate (diphospho) decarboxylase									cchcr1	5.72257e-07	-2.11661		Tmem185b	1.03935e-06	2.00923		nsun6	3.24254e-06	2.22038
MVP	major vault protein									cdc6	1.36588e-13	3.62195		Tmem2	6.32771e-08	-2.29073		nupl1	4.79059e-08	2.17261
MXD1	MAX dimerization protein 1									cdk10	1.04538e-07	-2.28839		Tmtc4	1.21678e-07	-2.11041		nupr1	2.85572e-08	-4.40524
MXRA5	matrix-remodelling associated 5									cdk5	3.54332e-07	-2.1121		Tox	1.62746e-09	-5.45588		ofd1	1.27986e-05	-2.14336
MYC	v-myc myelocytomatosis viral oncogene h									cebpd	0.00014632	-2.10616		Trim35	3.50925e-12	2.85475		oscp1	1.12166e-07	-2.23705
MYCBP	c-myc binding protein									cenph	3.92379e-08	2.27163		Tspan2	4.37818e-12	-4.56086		palm	3.15184e-09	-7.10773
MYD88	myeloid differentiation primary respons									cfd	9.46579e-05	-2.0119		Tspan6	5.67548e-09	-2.0444		pan2	2.73541e-06	-2.78847
MYL5	myosin, light chain 5, regulatory									cgnl1	3.69187e-09	-3.27352		Ttc12	2.27321e-10	-2.11655		pccA	4.73593e-07	-2.06837
MYL6B	myosin, light chain 6B, alkali, smooth									chchd10	1.59113e-09	2.4589		Ttc39b	1.75683e-06	2.09297		pcmtd2	3.07045e-09	-2.08266
MYLK	myosin light chain kinase									chd3	1.06663e-10	-3.02272		Ttyh3	1.02092e-10	-2.46198		pdcd2l	1.30836e-09	2.31268
MYO5C	myosin VC									chrna5	1.14105e-08	2.23941		Txndc16	1.08632e-06	-2.04454		phf19	3.28631e-10	2.74053
Maff	v-maf musculoaponeurotic fibrosarcoma o									cir1	1.40675e-07	-2.51151		Txnl4b	2.00498e-15	3.65585		phlda1	1.54408e-11	3.15174
Magee1	melanoma antigen family E, 1									clic3	1.02119e-06	-4.03578		UBIAD1	1.5671e-12	3.98941		phlda2	1.57838e-07	3.5295
Man2b1	mannosidase, alpha, class 2B, member 1									col12a1	7.52914e-08	-3.95687		UBR4	6.50741e-08	2.19318		pld6	1.56024e-08	2.0941
Matn2	matrilin 2									crip1	2.54527e-16	20.1418		UBXN8	8.65666e-09	-2.08109		plekha7	1.16573e-12	-3.71127
Mboat2	membrane bound O-acyltransferase domain									ctsf	1.64774e-08	-2.61419		UCP2	1.51191e-06	-2.18464		plscr1	1.06591e-10	3.45231
Mcm10	minichromosome maintenance complex comp									cxcr7	2.45233e-05	-2.68447		UGCG	2.19862e-14	3.42337		pno1	1.23808e-10	3.03946
Mcm5	minichromosome maintenance complex comp									cxorf38	1.92154e-06	2.19568		ULBP2	1.84496e-13	5.1872		poc1a	2.24517e-08	2.05862
Mdk	midkine (neurite growth-promoting facto									cyb5a	7.28952e-08	-2.34139		UNC45A	5.60844e-11	-2.1598		pola2	1.46413e-11	2.61421
Megf8	multiple EGF-like-domains 8									dalrd3	1.17123e-08	-2.24633		UNC5CL	1.47641e-08	-4.07505		poli	2.97937e-07	-2.40714
Melk	maternal embryonic leucine zipper kinas									ddah2	1.11051e-07	-2.28442		URB2	6.20897e-09	2.72802		ppp1r13l	1.62632e-13	-3.4582
Mesdc1	mesoderm development candidate 1									ddit4	3.20766e-12	-2.72748		USP31	4.63116e-12	2.68842		proS1	5.29239e-11	-5.11284
Mid2	midline 2									ddx10	3.13651e-11	4.05009		USP54	8.1605e-10	-2.07007		prss23	1.52795e-10	-2.99774
Mmp1	matrix metallopeptidase 1 (interstitial									dera	3.32812e-08	-2.02789		Uap1l1	9.60773e-14	6.43695		prss3	5.54792e-13	12.9625
Moap1	modulator of apoptosis 1									dhrs1	1.73179e-10	-3.14842		Ubxn11	1.38527e-06	-2.77024		psmb9	1.14603e-06	2.18375
Mrc2	mannose receptor, C type 2									dhx58	0.000565694	2.01626		Uchl1	2.67939e-13	13.5549		ptprr	1.46e-06	2.88924
Msx1	msh homeobox 1									dnajc4	8.19381e-09	-2.12098		VCAN	1.829e-07	-7.98416		rab31	4.19398e-12	4.05968
Mta1	metastasis associated 1									dpm3	1.3686e-07	-2.08771		VPS36	1.88922e-07	-2.01745		rab40b	8.21444e-11	-4.47737
Mthfd2l	methylenetetrahydrofolate dehydrogenase									dtl	1.35666e-10	2.7534		WDR19	1.71545e-06	-3.11157		rab5b	6.14828e-09	-2.0711
Mxd3	MAX dimerization protein 3									dusp5	6.83828e-14	9.60059		WDR35	6.56052e-10	-2.16352		rad50	4.44003e-09	-2.55289
Myof	myoferlin									dusp6	1.16081e-10	12.3518		WDR53	1.54096e-13	2.54733		rangap1	1.80325e-11	2.01527
Mypn	myopalladin									ech1	1.03348e-09	-2.53083		WDR54	1.22263e-10	-2.16923		rasgrp3	5.22631e-07	3.44757
N6AMT2	N-6 adenine-specific DNA methyltransfer									epcam	7.03263e-09	-2.02518		WDR91	1.18309e-09	-2.96443		rassf8	8.87632e-06	2.16155
NADSYN1	NAD synthetase 1									ephX1	1.38872e-09	-2.60378		WDTC1	3.4685e-08	-2.13024		rbm24	8.72885e-06	2.68812
NAMPT	nicotinamide phosphoribosyltransferase									fam107b	3.38195e-11	2.90329		WFDC2	2.73947e-08	3.44518		rgmb	6.01555e-08	2.57274
NAT6	N-acetyltransferase 6 (GCN5-related)									fam172a	2.50286e-08	-2.16446		WNT5A	2.22226e-06	3.19788		rph3al	2.16057e-12	-4.82151
NAV1	neuron navigator 1									fam54a	2.97152e-13	2.89968		WSB1	5.62247e-06	-2.31303		rrs1	1.11266e-07	2.45867
NCAPH	non-SMC condensin I complex, subunit H									fitm2	3.55995e-10	2.74276		WWTR1	1.18702e-06	-2.26456		rtn2	9.14943e-08	-3.03139
NCEH1	arylacetamide deacetylase-like 1									fn1	1.40443e-07	-3.67549		Wdr25	1.45064e-09	-2.28288		runx3	1.11093e-07	3.14878
NCOA7	nuclear receptor coactivator 7									foxd1	1.91116e-08	3.53528		Wdr60	1.9482e-09	-4.12605		sec11c	3.23234e-09	2.20329
NCOR1	nuclear receptor co-repressor 1									fucA1	4.85468e-10	-2.70807		XAF1	4.47183e-08	6.50787		sfrs18	9.60374e-07	-2.1243
NCRNA00219	chromosome 5 open reading frame 26									gabpb1	3.36554e-12	2.21367		XIST	6.54825e-06	-3.31176		sgms1	4.38335e-08	2.74922
NDRG3	NDRG family member 3									galT	5.43454e-11	-2.27523		XPO4	7.4043e-13	2.04746		sh3yl1	4.8523e-11	-2.9327
NDST1	N-deacetylase/N-sulfotransferase (hepar									gcnt3	5.4083e-06	-2.23486		Xbp1	7.77859e-10	2.68326		ska3	2.22098e-10	2.33886
NEDD1	neural precursor cell expressed, develo									gfra1	6.63513e-05	-2.73009		Xpo5	2.56607e-12	2.29329		slc22a2	3.64745e-10	-7.89279
NEDD4	neural precursor cell expressed, develo									glb1l	1.06532e-06	2.65835		Yars	4.54407e-11	2.18185		slc30a1	1.55169e-08	2.71308
NEIL1	nei endonuclease VIII-like 1 (E. coli)									gpatch2	2.13355e-09	2.02303		ZC3H12A	4.23437e-05	3.23549		slc35e4	2.08294e-07	2.10626
NEXN	nexilin (F actin binding protein)									grn	3.04001e-06	-2.19876		ZC3H12C	1.3743e-12	4.59099		slc5a6	4.47124e-10	2.51779
NFE2L3	nuclear factor (erythroid-derived 2)-li									gxylt2	3.49668e-09	-2.59608		ZC3H8	1.77693e-09	2.33894		smagp	2.74231e-11	2.5003
NFIA	nuclear factor I/A									haus6	9.81036e-09	2.00571		ZCCHC2	1.92727e-08	2.30148		smarca2	4.67594e-12	-2.89134
NFIB	nuclear factor I/B									herc6	6.3008e-08	2.9061		ZDBF2	0.000136383	2.23039		spc25	1.79648e-06	2.07553
NFIL3	nuclear factor, interleukin 3 regulated									hibadh	1.48609e-09	-2.34685		ZFAND2A	4.87681e-12	2.61415		sqlE	2.06541e-07	-2.08465
NFKBIA	nuclear factor of kappa light polypepti									hmgcL	1.6408e-10	-3.29809		ZFP30	7.38784e-09	2.10107		srebf2	1.27976e-06	-2.04689
NGFRAP1	nerve growth factor receptor (TNFRSF16)									hmox1	1.25523e-07	2.63614		ZMYM3	1.34657e-13	-3.69855		st3gal5	1.27182e-08	3.0113
NID2	nidogen 2 (osteonidogen)									hyi	1.16026e-10	2.56677		ZNF187	1.40124e-11	-2.39169		stom	1.55539e-07	2.11585
NINL	ninein-like									idh3a	1.05061e-11	2.03576		ZNF22	1.35503e-12	2.33431		sumf1	5.34078e-10	-2.25113
NIP7	nuclear import 7 homolog (S. cerevisiae									ifi30	4.43742e-06	2.14153		ZNF248	9.05498e-07	-2.51792		sytl3	1.1649e-09	3.7999
NIPAL3	NIPA-like domain containing 3									ifit5	2.53297e-07	2.355		ZNF259	6.14712e-13	2.65844		tap1	4.55002e-07	2.38557
NIPSNAP1	nipsnap homolog 1 (C. elegans)									igfbp3	1.46074e-11	-6.91468		ZNF267	1.0215e-07	2.04174		tbc1d19	5.74941e-11	-2.54617
NKTR	natural killer-tumor recognition sequen									isyna1	9.93696e-08	2.40383		ZNF280B	6.11722e-13	2.55411		tbc1d9b	2.24729e-10	-2.09339
NLRX1	NLR family member X1									itga6	7.18461e-08	2.01611		ZNF280C	1.33089e-07	2.13682		tbx15	3.76238e-07	-2.11089
NME7	non-metastatic cells 7, protein express									kiaa0556	3.20624e-07	-2.12353		ZNF295	1.3738e-11	3.2503		tbxa2r	3.30405e-10	2.70314
NOC3L	nucleolar complex associated 3 homolog									kiaa0895	1.61399e-07	-2.28261		ZNF300	1.07579e-05	-2.11703		tcf7l1	4.20172e-06	-2.29764
NOP16	NOP16 nucleolar protein homolog (yeast)									kiaa1370	2.5423e-10	-3.64661		ZNF323	1.12725e-10	-2.85191		tgfbi	3.96766e-09	2.23544
NPHP4	nephronophthisis 4									kiaa1524	5.42904e-08	3.05934		ZNF331	3.13427e-06	2.09031		thbs2	6.00205e-11	11.9745
NPNT	nephronectin									klf6	1.43419e-07	2.73327		ZNF418	4.82516e-05	-2.14958		thoc4	1.22749e-05	2.16748
NR2F2	nuclear receptor subfamily 2, group F,									klhl21	2.4295e-08	2.46664		ZNF439	2.16664e-06	-2.42524		tmem106b	1.60179e-07	-2.00107
NRBP2	nuclear receptor binding protein 2									lamb2	2.96075e-08	-4.46153		ZNF469	2.20622e-07	4.75343		tmem107	3.98329e-07	-2.14506
NRM	nurim (nuclear envelope membrane protei									lat	1.15654e-14	11.3549		ZNF512B	1.75167e-11	-2.66388		tmem150a	2.39464e-08	-2.39891
NT5DC2	5'-nucleotidase domain containing 2									lbh	7.40892e-10	-5.15391		ZNF518A	7.74866e-07	2.24979		tpr	3.02769e-08	-2.9975
NT5DC3	5'-nucleotidase domain containing 3									loxl1	1.07119e-07	-3.47788		ZNF565	1.30104e-09	-2.35705		trim2	1.64625e-13	-2.67721
NT5E	5'-nucleotidase, ecto (CD73)									lrig1	0.00273719	2.00121		ZNF570	4.68862e-06	2.93375		tspan15	2.10793e-09	-2.53168
NTN4	netrin 4									2010-03-03	8.81901e-06	2.54056		ZNF571	3.43813e-08	2.1841		ttc14	9.52719e-05	-2.02226
NTNG2	netrin G2									mbnl2	1.75207e-11	-2.0741		ZNF586	1.50923e-09	2.14501		tuba3c	4.04454e-07	2.16371
NUAK2	NUAK family, SNF1-like kinase, 2									mest	1.48317e-18	7.48723		ZNF652	1.28993e-05	-2.10079		twistnb	3.73594e-08	2.05017
NUCB1	nucleobindin 1									mfsd3	4.33059e-10	-2.64854		ZNF669	1.51876e-06	2.1034		uaca	4.4126e-06	-2.41387
NUDT15	nudix (nucleoside diphosphate linked mo									micB	1.83322e-11	8.85485		ZNF670	1.59377e-07	2.63564		ubl3	5.77477e-10	-2.4615
NUDT2	nudix (nucleoside diphosphate linked mo									mmp24	1.62536e-09	-2.05073		ZNF692	4.65682e-08	-3.67278		upp1	3.37893e-12	4.88546
NUF2	NUF2, NDC80 kinetochore complex compone									mn1	3.25941e-07	-3.09092		ZNF697	2.79606e-09	4.30672		vamp5	1.00087e-08	3.12264
NUMA1	nuclear mitotic apparatus protein 1									mras	4.4088e-06	-2.06576		ZNF767	2.25876e-05	-2.8136		vgll3	4.52827e-05	2.14401
NUP155	nucleoporin 155kDa									msrB2	4.80524e-12	-2.48499		ZNF788	2.76327e-06	2.42218		vldlr	5.21442e-06	-2.82126
NUP35	nucleoporin 35kDa									mthfd2	3.28183e-08	2.23616		ZNF83	4.74162e-07	-2.29531		wdr4	5.33477e-10	2.44054
NUP50	nucleoporin 50kDa									mx1	7.00385e-13	22.3065		ZNF850P	7.79669e-05	2.21808		ypel3	6.52603e-10	-5.52357
NXT2	nuclear transport factor 2-like export									nat14	4.27826e-13	-3.94126		ZNF862	8.0677e-07	-2.45347		yrdC	6.37996e-14	2.80901
Nags	N-acetylglutamate synthase									nme3	6.57389e-06	-2.04531		Zeb2	9.59056e-09	6.97183		znf160	7.1681e-06	-2.05925
Nap1l3	nucleosome assembly protein 1-like 3									nnmt	2.65469e-06	-2.07183		Zfc3h1	3.95146e-09	-3.05134		znf236	3.86265e-06	-2.01981
Nbr2	neighbor of BRCA1 gene 2									nptxr	2.38925e-11	-4.41107		Zmynd8	1.29412e-08	-2.38192		znf33a	3.042e-10	-2.36293
Nedd4l	neural precursor cell expressed, develo									nrcam	4.21534e-08	-3.80865		Znf597	3.59051e-05	2.04671
Neil3	nei endonuclease VIII-like 3 (E. coli)									nsmce1	1.58923e-08	-2.12586		Znf622	1.44657e-09	2.50536
Neu1	sialidase 1 (lysosomal sialidase)									nthl1	1.72295e-07	-2.71857		Znf626	1.22873e-10	-2.04349
Nf2	neurofibromin 2 (merlin)									nupl1	1.59608e-09	2.58143		Znfx1	1.02774e-10	2.55213
Nfkbie	nuclear factor of kappa light polypepti									nupr1	6.63796e-08	-4.08819		abcc5	6.23409e-09	-3.3911
Ngf	nerve growth factor (beta polypeptide)									oscp1	9.08327e-11	-3.37588		abl2	2.27484e-10	2.81738
Nicn1	nicolin 1									palm	9.11658e-09	-6.31835		actn4	1.16867e-18	-3.88317
Ninj1	ninjurin 1									pan2	4.83673e-07	-3.17237		afap1l1	6.23081e-09	2.61682
Nlgn2	neuroligin 2									pccA	2.27851e-07	-2.14313		agbl5	9.60902e-07	-2.11524
Nmu	neuromedin U									pcmtd2	9.91985e-10	-2.18683		aifm2	5.09976e-19	12.1744
Nop56	NOP56 ribonucleoprotein homolog (yeast)									pdcd2l	8.7855e-11	2.64822		akr1c2	1.81294e-07	-4.87585
Nptx2	neuronal pentraxin II									pgls	1.88331e-08	-2.49358		aldh3a2	1.27395e-08	-2.06351
Nr1d1	nuclear receptor subfamily 1, group D,									pgm1	4.03409e-12	-2.13888		alpk2	1.07934e-06	-4.92412
Nrip3	nuclear receptor interacting protein 3									phf19	1.73782e-09	2.50458		ampd2	2.8717e-11	-2.16621
OAF	OAF homolog (Drosophila)									phlda1	8.46511e-12	3.27115		anxa4	2.34369e-11	-2.28966
OCEL1	occludin/ELL domain containing 1									phlda2	1.96992e-09	5.15942		ap1g2	8.48484e-08	-3.4595
ODC1	ornithine decarboxylase 1									phyH	1.28076e-06	-2.01373		appl2	1.17126e-12	-3.33493
OLFML2A	olfactomedin-like 2A									pld6	4.46611e-08	2.00086		arrdc4	3.02008e-05	2.6259
OLFML3	olfactomedin-like 3									plekha7	1.37755e-12	-3.66949		as3mt	6.72284e-07	-2.22785
ORAOV1	oral cancer overexpressed 1									plscr1	1.43672e-10	3.38382		asnS	6.86155e-20	5.724
ORC6L	origin recognition complex, subunit 6 l									pno1	2.70843e-11	3.34307		ate1	6.13458e-09	2.02613
OS9	osteosarcoma amplified 9, endoplasmic r									poc5	2.84437e-07	2.1129		atg10	5.39786e-08	-2.079
OSBPL2	oxysterol binding protein-like 2									poli	1.71147e-07	-2.48519		atp6v1b2	4.05613e-08	2.0568
OSBPL3	oxysterol binding protein-like 3									ppl	2.98273e-07	-2.88937		b3gnt1	7.12792e-12	-3.20015
OSBPL5	oxysterol binding protein-like 5									ppp1r13l	4.72831e-12	-2.83504		bdh2	1.28449e-10	-6.04867
OSBPL9	oxysterol binding protein-like 9									prickle2	1.33251e-05	-2.46065		bmp2	2.95207e-09	2.8966
OSGIN1	oxidative stress induced growth inhibit									proS1	2.6872e-07	-2.69619		btg1	3.4877e-08	2.36881
OSTM1	osteopetrosis associated transmembrane									prpH	4.38187e-07	2.60172		c10orf140	0.000215232	-2.25839
Oas3	2'-5'-oligoadenylate synthetase 3, 100k									prss23	2.1867e-09	-2.57544		c10orf35	2.18293e-11	2.85823
Odz2	odz, odd Oz/ten-m homolog 2 (Drosophila									prss3	1.0274e-12	11.9619		c14orf1	4.47941e-09	-2.00908
Ogt	O-linked N-acetylglucosamine (GlcNAc) t									rab31	2.70857e-07	2.10388		c17orf48	6.01471e-10	2.44701
Orai3	ORAI calcium release-activated calcium									rab36	1.98786e-08	-2.01863		c18orf19	1.10911e-10	2.60304
Orc1l	origin recognition complex, subunit 1-l									rab40b	7.67359e-10	-3.76256		c1orf107	1.03185e-09	2.14209
Osbpl6	oxysterol binding protein-like 6									rab5b	5.46075e-10	-2.30709		c1orf109	6.24885e-07	2.88919
Otud1	OTU domain containing 1									rasgrp3	5.9203e-05	2.39152		c1orf85	5.26997e-09	2.40887
Oxtr	oxytocin receptor									rbm24	2.975e-05	2.45677		c2orf68	6.50159e-11	-2.59348
P2RX4	purinergic receptor P2X, ligand-gated i									rgmb	4.58629e-07	2.29366		c4orf33	6.94099e-07	-2.11772
P2ry6	pyrimidinergic receptor P2Y, G-protein									ripk4	6.43764e-12	-3.18799		c6orf192	6.91552e-09	-2.73673
P4HA1	prolyl 4-hydroxylase, alpha polypeptide									rp2	0.000318043	2.0304		c8orf33	4.2279e-09	3.01773
P4HTM	prolyl 4-hydroxylase, transmembrane (en									rph3al	2.52922e-11	-3.98057		carS	1.38596e-18	3.36852
P4ha3	prolyl 4-hydroxylase, alpha polypeptide									rrs1	2.76277e-08	2.66543		cat	4.27373e-09	-3.03259
PA2G4P4	proliferation-associated 2G4, 38kDa									rtn2	8.90759e-08	-3.03703		cav1	5.91993e-09	-2.11769
PABPC1L	poly(A) binding protein, cytoplasmic 1-									rufy1	4.967e-09	-2.04188		cbx4	9.77422e-16	4.31885
PACS2	phosphofurin acidic cluster sorting pro									runx3	2.19945e-07	2.99892		ccbe1	1.1704e-12	-3.39259
PADI2	peptidyl arginine deiminase, type II									sec11c	5.70411e-09	2.1476		ccdc104	7.08774e-11	-2.42225
PADI3	peptidyl arginine deiminase, type III									sgms1	1.27966e-07	2.57565		ccdc99	3.48736e-08	-2.03468
PAK1IP1	PAK1 interacting protein 1									sgms2	5.86308e-10	2.34868		cchcr1	2.29112e-09	-2.86228
PAK4	p21 protein (Cdc42/Rac)-activated kinas									sgpl1	1.05578e-07	2.1197		cdc6	1.5243e-09	2.18629
PANX1	pannexin 1									sh3yl1	7.76045e-11	-2.8546		cdk10	2.39088e-10	-3.25807
PANX2	pannexin 2									ska3	2.22098e-09	2.10999		cdk5	7.57005e-09	-2.58051
PAQR3	progestin and adipoQ receptor family me									slain1	2.87776e-06	2.35925		cgnl1	6.7709e-11	-4.40431
PAQR7	progestin and adipoQ receptor family me									slc25a1	1.40742e-07	-2.25463		chchd10	3.2632e-11	3.04911
PAQR8	progestin and adipoQ receptor family me									slc30a1	1.07539e-09	3.20655		chd3	5.64178e-13	-4.3043
PARP12	poly (ADP-ribose) polymerase family, me									slc35e4	6.9253e-09	2.50256		cir1	1.41715e-07	-2.51043
PARP9	poly (ADP-ribose) polymerase family, me									slc5a6	1.1045e-10	2.71099		col12a1	9.74496e-10	-5.91643
PAX8	paired box 8									smagp	3.98221e-11	2.45528		crip1	1.18101e-13	9.08971
PCDHB10	protocadherin beta 10									smarca2	5.02276e-11	-2.54896		cryz	1.71715e-15	-5.50113
PCDHB13	protocadherin beta 13									smpdl3a	4.2168e-07	-2.10705		csnk2a2	2.01554e-10	2.04874
PCDHB14	protocadherin beta 14									snap23	1.24965e-12	-2.06547		ctsf	1.06321e-07	-2.35671
PCDHB15	protocadherin beta 15									soat1	6.57771e-06	2.25126		cyp20a1	5.64631e-11	2.27371
PCDHB16	protocadherin beta 16									spc25	9.24678e-07	2.14744		ddah2	1.55367e-08	-2.53917
PCDHB2	protocadherin beta 2									sqlE	3.77966e-08	-2.2635		ddx10	7.63642e-08	2.44803
PCDHB7	protocadherin beta 7									stk19	1.00813e-07	-2.21173		dhrs1	3.1248e-13	-4.96295
PCLO	piccolo (presynaptic cytomatrix protein									stom	1.02721e-07	2.15839		dlx1	9.93433e-06	2.04654
PCMTD1	protein-L-isoaspartate (D-aspartate) O-									sumf1	1.46032e-13	-3.50513		dnajb9	4.44852e-09	2.62466
PCNT	pericentrin									sync	9.39185e-10	-2.19722		dusp5	6.01042e-14	9.74445
PCOLCE2	procollagen C-endopeptidase enhancer 2									sytl3	5.09404e-08	2.91212		dusp6	1.14536e-09	9.15046
PCYOX1	prenylcysteine oxidase 1									tap1	5.52883e-07	2.35914		dync1li1	2.71682e-10	2.01195
PDCD4	programmed cell death 4 (neoplastic tra									tbc1d19	5.60421e-12	-2.88094		ech1	1.37953e-07	-2.00156
PDDC1	Parkinson disease 7 domain containing 1									tbc1d9b	5.11202e-10	-2.02564		eef2k	4.33941e-12	-2.32928
PDE12	phosphodiesterase 12									tbxa2r	4.1892e-13	4.12821		epcam	8.43672e-11	-2.47213
PDE6D	phosphodiesterase 6D, cGMP-specific, ro									tead4	1.08753e-10	2.11253		etaa1	5.64898e-07	-2.27653
PDGFA	platelet-derived growth factor alpha po									tef	4.56154e-05	-2.09092		fam107b	8.07092e-15	5.15624
PDGFC	platelet derived growth factor C									tgfbi	1.69137e-09	2.32753		fam171a1	2.91731e-06	3.0063
PDRG1	p53 and DNA-damage regulated 1									thbs2	7.546e-05	2.72858		fam172a	1.27119e-09	-2.50669
PDSS1	prenyl (decaprenyl) diphosphate synthas									thoc4	6.37299e-07	2.59855		fam26f	2.41097e-07	2.58199
PDXDC1	pyridoxal-dependent decarboxylase domai									tiam1	3.19997e-09	2.0007		fam54a	5.1082e-11	2.25335
PDZK1IP1	PDZK1 interacting protein 1									tk2	4.01108e-12	-2.64115		fbxl19	5.8827e-10	-2.29493
PEG10	paternally expressed 10									tmem106b	1.60343e-07	-2.00098		fhod1	1.9734e-08	-2.31768
PELI2	pellino homolog 2 (Drosophila)									tmem129	1.00806e-08	-2.17269		fign	8.80512e-09	-2.52274
PER2	period homolog 2 (Drosophila)									tmem144	5.66108e-08	-2.31956		foxd1	4.21826e-06	2.4297
PEX11B	peroxisomal biogenesis factor 11 beta									tmem150a	1.25146e-08	-2.48349		gabpb1	4.23111e-14	2.70565
PEX11G	peroxisomal biogenesis factor 11 gamma									tmem38b	2.57252e-09	2.13286		galE	5.71956e-09	2.02245
PEX2	peroxisomal membrane protein 3, 35kDa									tnks	3.81731e-10	-2.10333		galnt11	2.1202e-12	-2.36533
PF4V1	platelet factor 4 variant 1									tspan15	2.17629e-09	-2.52739		gbp5	4.3929e-06	4.24685
PFDN2	prefoldin subunit 2									ttc17	2.40857e-06	-2.19283		gcnt3	2.77023e-10	-4.41599
PFKL	phosphofructokinase, liver									tuba3c	1.00726e-06	2.06721		gfpt2	1.14738e-11	2.56896
PGAP3	post-GPI attachment to proteins 3									tysnd1	1.52751e-10	-2.5528		gfra1	1.16732e-08	-6.20389
PGRMC2	progesterone receptor membrane componen									uaca	2.04408e-06	-2.53677		glb1l	3.25606e-05	2.13666
PHACTR4	phosphatase and actin regulator 4									ubl3	1.3576e-09	-2.35948		glt8d1	3.99235e-13	-3.86601
PHF21A	PHD finger protein 21A									ubxn6	3.06214e-07	-2.03078		gmfb	4.76239e-09	2.0859
PHF3	PHD finger protein 3									upp1	5.28525e-13	5.73611		gnpda1	3.22369e-07	2.01143
PHGDH	phosphoglycerate dehydrogenase									vamp5	6.22299e-09	3.22497		golga4	4.43825e-05	-2.4768
[truncated: 1,114 more rows]

## Sheet: SKBR3 MIRs
SKBR3 Different Passages (7)			SKBR3 Different Passages (7)
[truncated: 59 more rows]
