# Supplementary material for: Integrated Epigenetics of Human Breast Cancer: Synoptic Investigation of Targeted Genes, MicroRNAs and Proteins upon Demethylation Treatment
Source: PubMed Central journal article supplement (PMC3208622; doi:10.1371/journal.pone.0027355), 2011-11-04
Supplement: pone.0027355.s004.pdf [file pone.0027355.s004.pdf]

## Dataset S4

### Proteomics Profiles

#### HB2 (Breast Epithelial Cell Line)

|             | Un-treated | Treated | Passage 1 | Passage 3 | Passage 5 | Passage 7 | Passage 10 |
|-------------|------------|---------|-----------|-----------|-----------|-----------|------------|
| Replicate 1 |            |         |           |           |           |           |            |
| Replicate 2 |            |         |           |           |           |           |            |
| Replicate 3 |            |         |           |           |           |           |            |

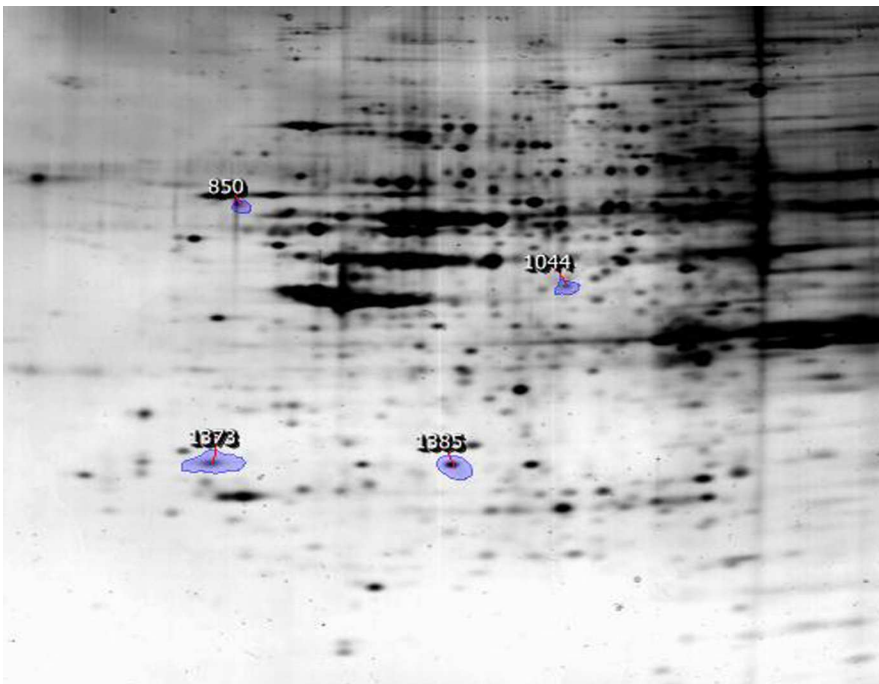

| Spot No. | Anova (p) | Fold change | pI   |
|----------|-----------|-------------|------|
| 1373     | 0.022     | 4.9         | 5.07 |
| 850      | 0.040     | 2.0         | 5.3  |
| 1044     | 0.044     | 1.6         | 7.75 |
| 1385     | 0.050     | 2.4         | 6.94 |

Spot picking gel for significant up/down-regulated intersection proteins.

Expression profile of candidate spots within different treatment passages.

Spot no. 1373

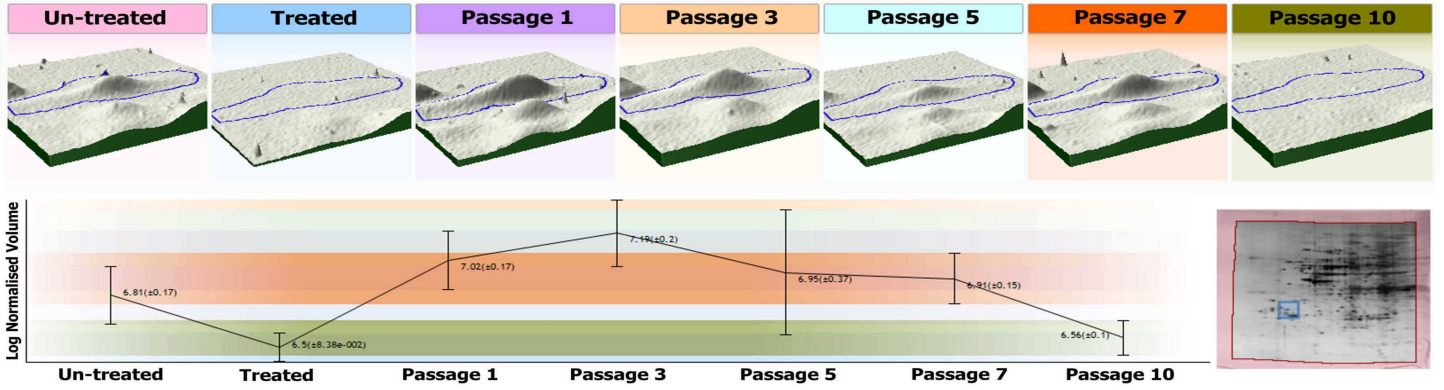

Spot no. 850

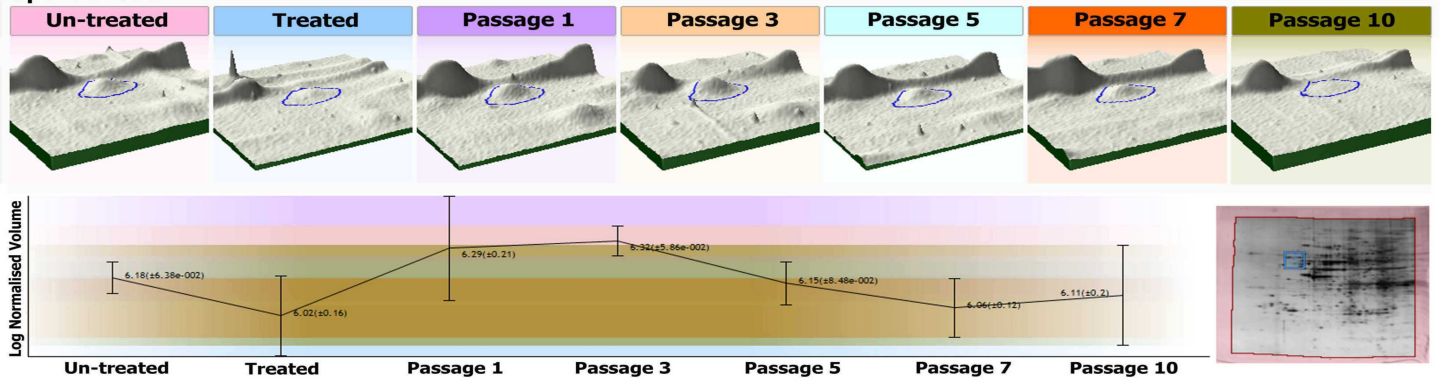

Spot no. 1044

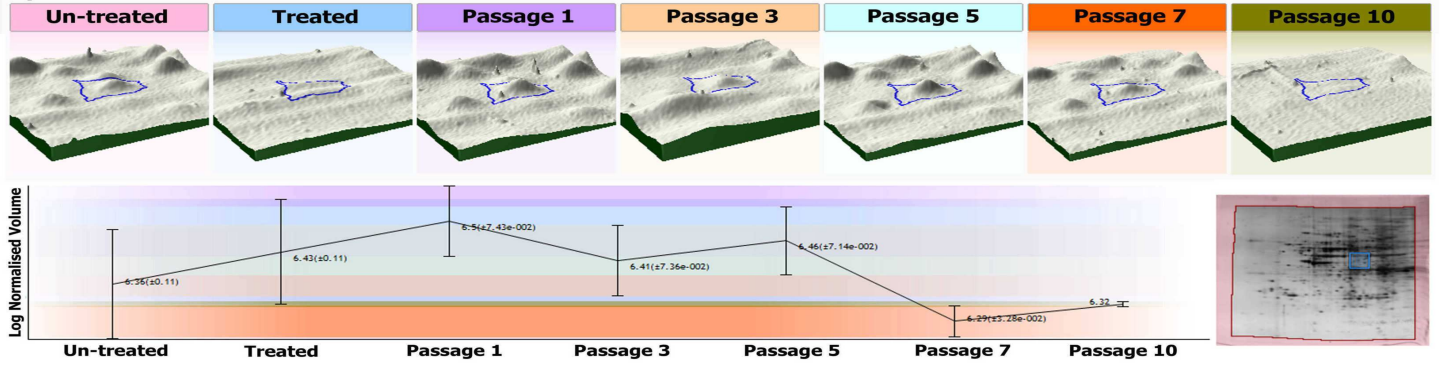

Spot no. 1385

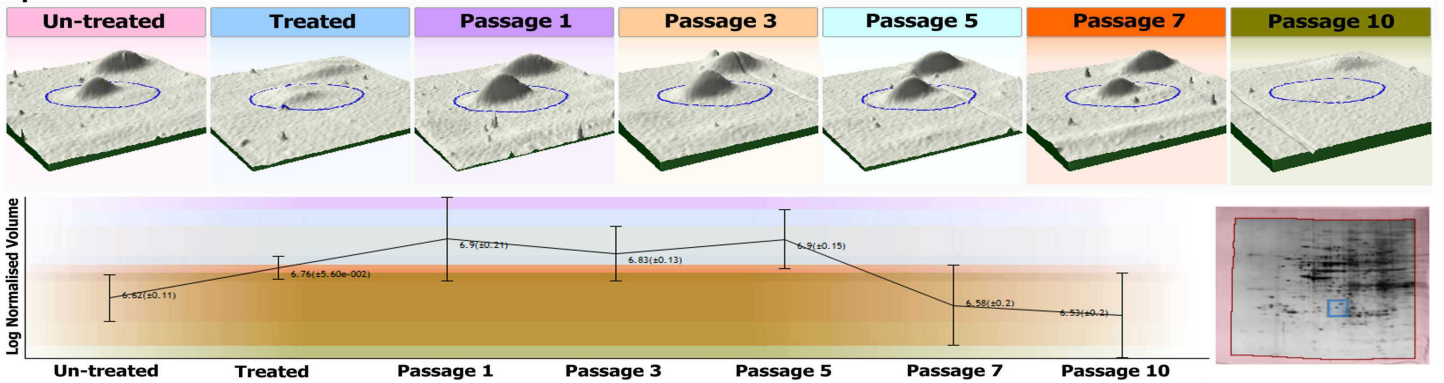

## MDA-MB231 (Highly Aggressive Breast Cancer Cell Line)

|             | Un-treated | Treated | Passage 1 | Passage 3 | Passage 5 | Passage 7 | Passage 10 |
|-------------|------------|---------|-----------|-----------|-----------|-----------|------------|
| Replicate 1 |            |         |           |           |           |           |            |
| Replicate 2 |            |         |           |           |           |           |            |
| Replicate 3 |            |         |           |           |           |           |            |

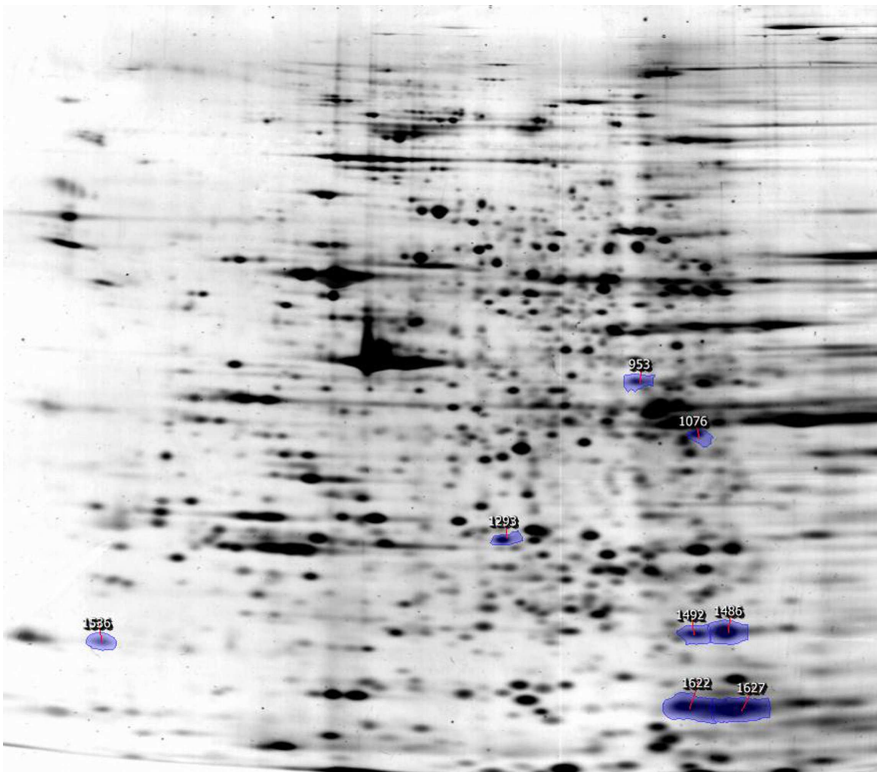

| Spot No. | Anova (p) | Fold change | pI   |
|----------|-----------|-------------|------|
| 1622     | 0.007     | 2.8         | 8.36 |
| 953      | 0.030     | 1.6         | 7.98 |
| 1486     | 0.032     | 1.9         | 8.7  |
| 1492     | 0.036     | 2.0         | 8.46 |
| 1627     | 0.038     | 2.6         | 8.83 |
| 1536     | 0.038     | 1.6         | 3.72 |
| 1293     | 0.041     | 1.7         | 6.94 |
| 1076     | 0.047     | 1.9         | 8.47 |

Spot picking gel for significant up/down-regulated intersection proteins.

Expression profile of candidate spots within different treatment passages.

**Spot no. 1622**

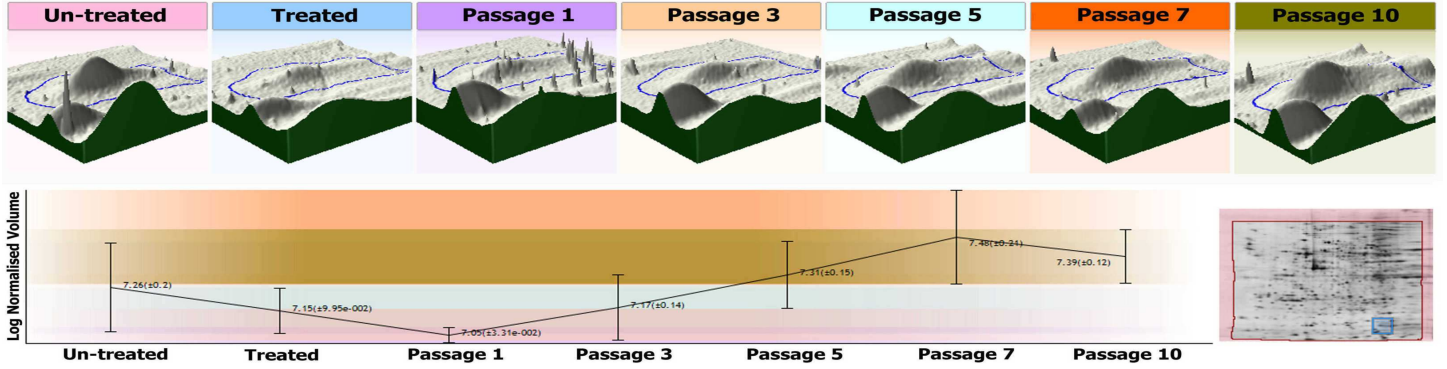

**Spot no. 953**

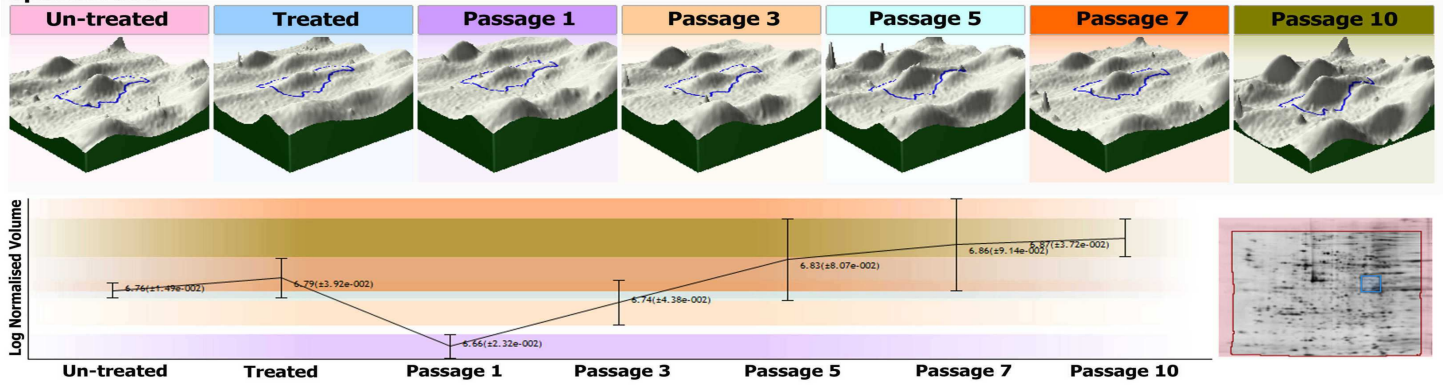

**Spot no. 1486**

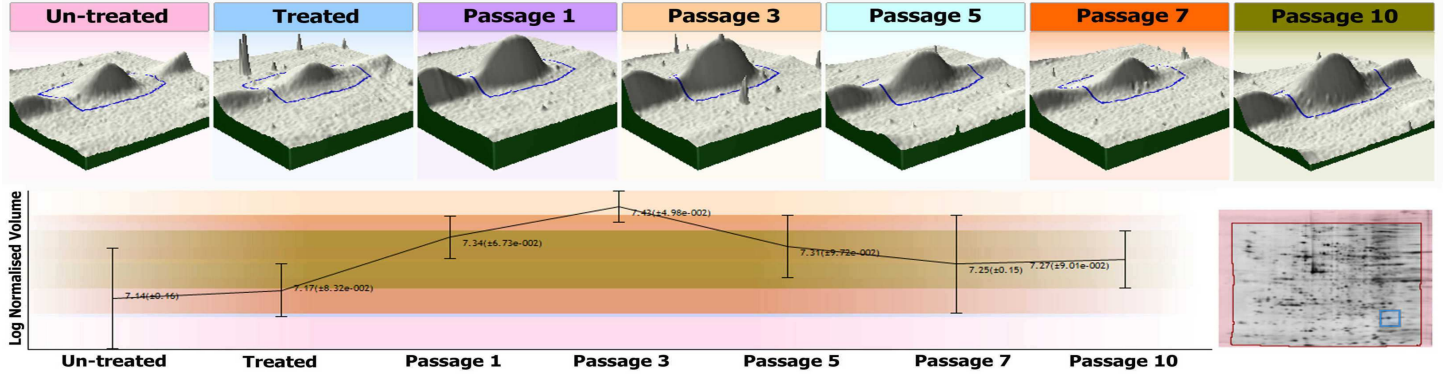

**Spot no. 1492**

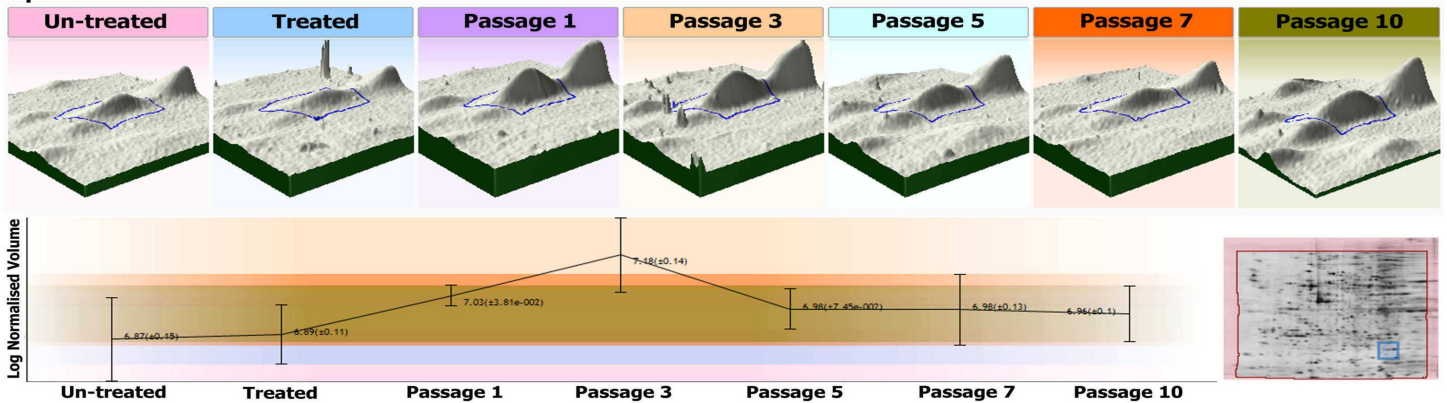

**Spot no. 1627**

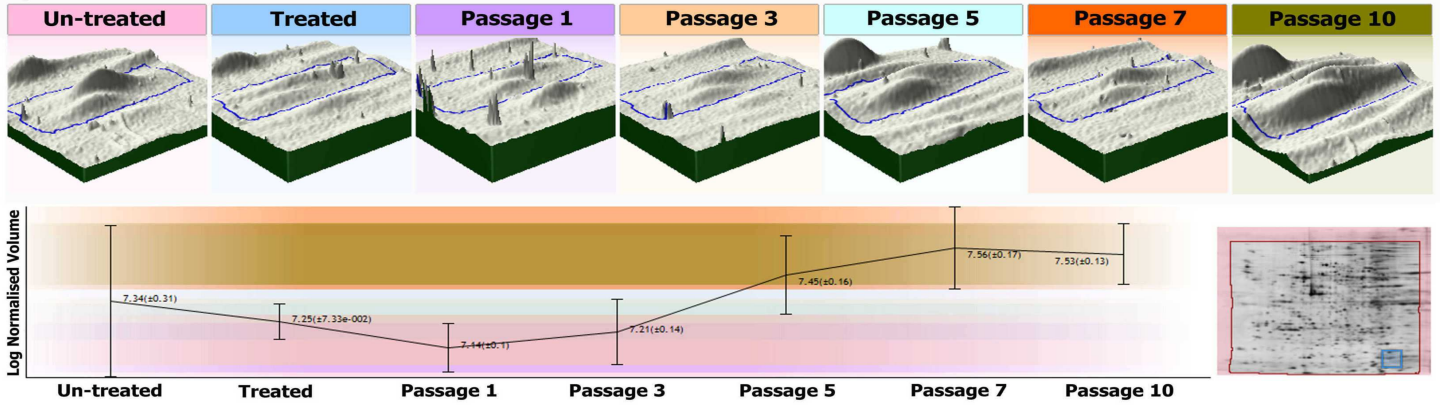

**Spot no. 1536**

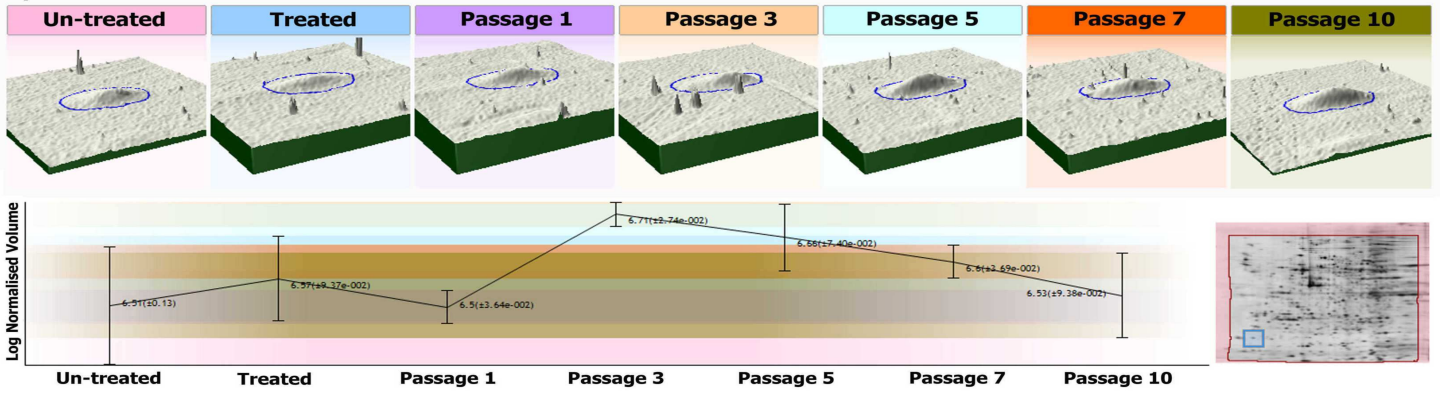

**Spot no. 1293**

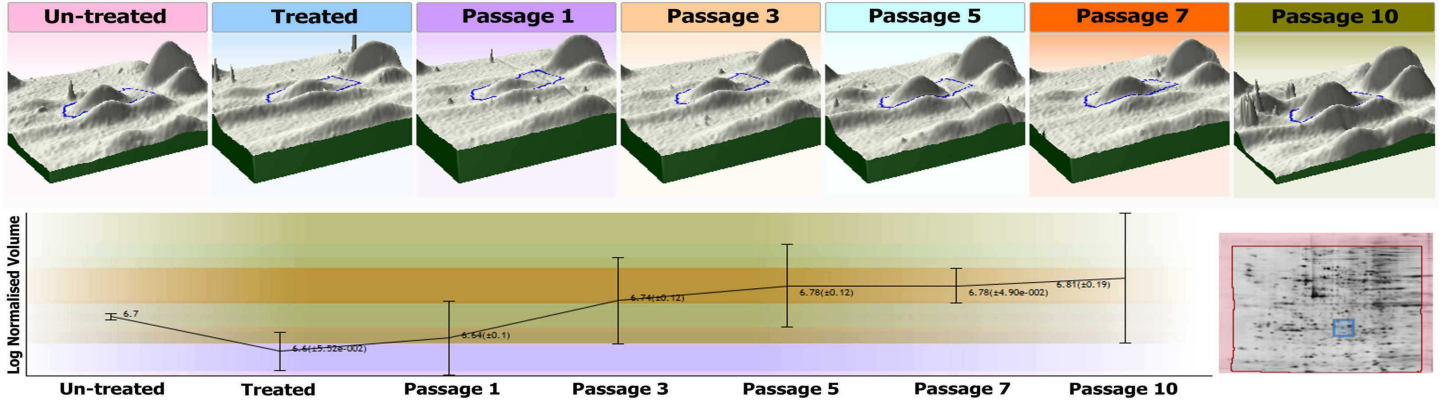

**Spot no. 1076**

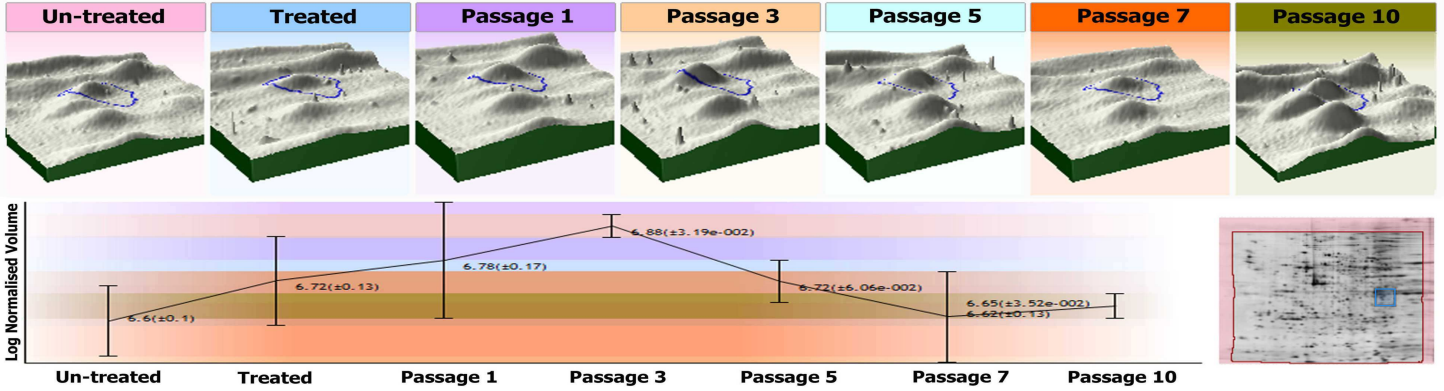

## SKBR3 (Non- aggressive Breast Cancer Cell Line)

|             | Un-treated | Treated | Passage 1 | Passage 3 | Passage 5 | Passage 7 | Passage 10 |
|-------------|------------|---------|-----------|-----------|-----------|-----------|------------|
| Replicate 1 |            |         |           |           |           |           |            |
| Replicate 2 |            |         |           |           |           |           |            |
| Replicate 3 |            |         |           |           |           |           |            |

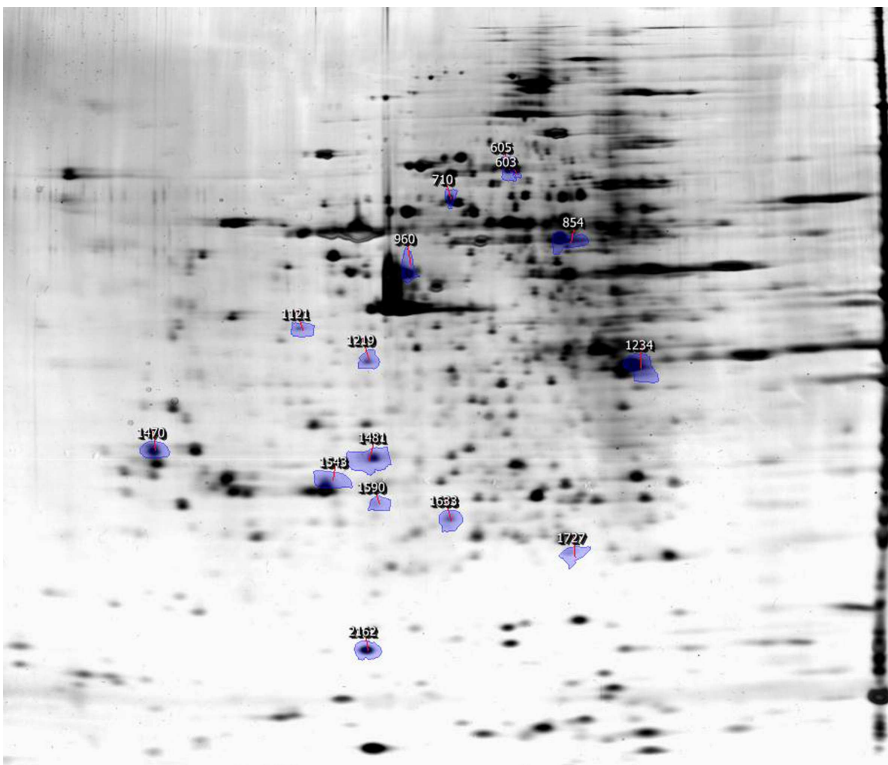

| Spots No. | Anova (p) | Fold change | pI   |
|-----------|-----------|-------------|------|
| 710       | 0.005     | 3.1         | 7.2  |
| 1543      | 0.013     | 2.2         | 6.11 |
| 2162      | 0.016     | 2.6         | 6.42 |
| 1727      | 0.016     | 1.9         | 8.24 |
| 603       | 0.017     | 7.3         | 7.76 |
| 1470      | 0.021     | 6.6         | 4.67 |
| 1121      | 0.025     | 3.2         | 5.87 |
| 854       | 0.030     | 1.9         | 8.16 |
| 1633      | 0.030     | 2.9         | 7.18 |
| 960       | 0.038     | 2.7         | 6.8  |
| 1219      | 0.041     | 2.2         | 6.47 |
| 1234      | 0.045     | 2.0         | 8.78 |
| 605       | 0.047     | 3.3         | 7.7  |
| 1590      | 0.047     | 2.5         | 6.53 |
| 1481      | 0.048     | 2.7         | 6.53 |

Spot picking gel for significant up/down-regulated intersection proteins.

expression profile of candidate spots within different treatment passages.

**Spot no. 1481**

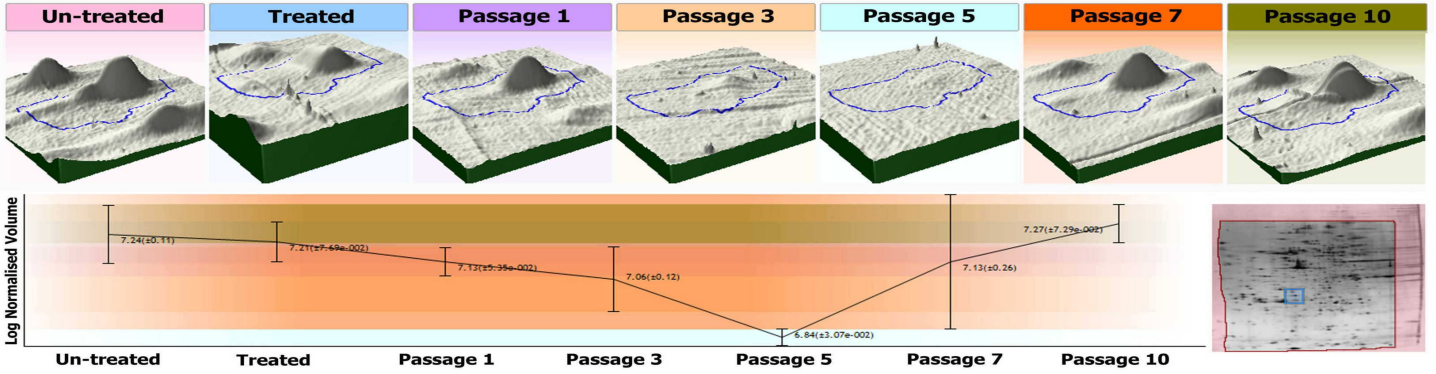

**Spot no. 1590**

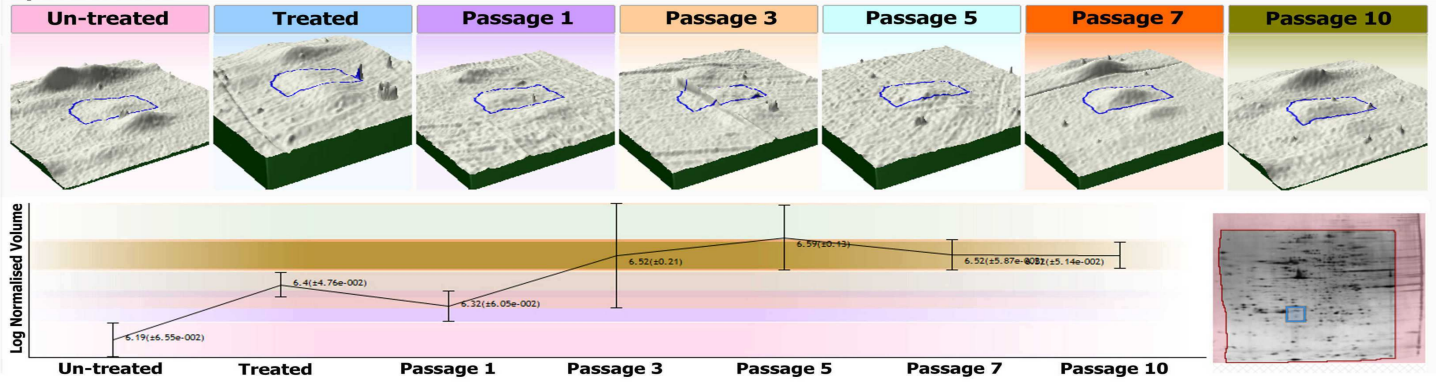

**Spot no. 605**

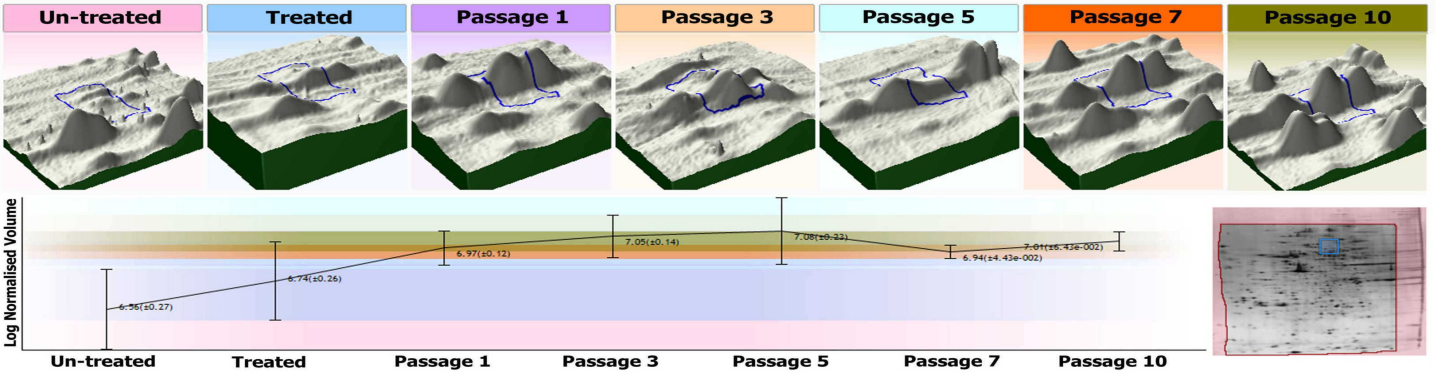

**Spot no. 1234**

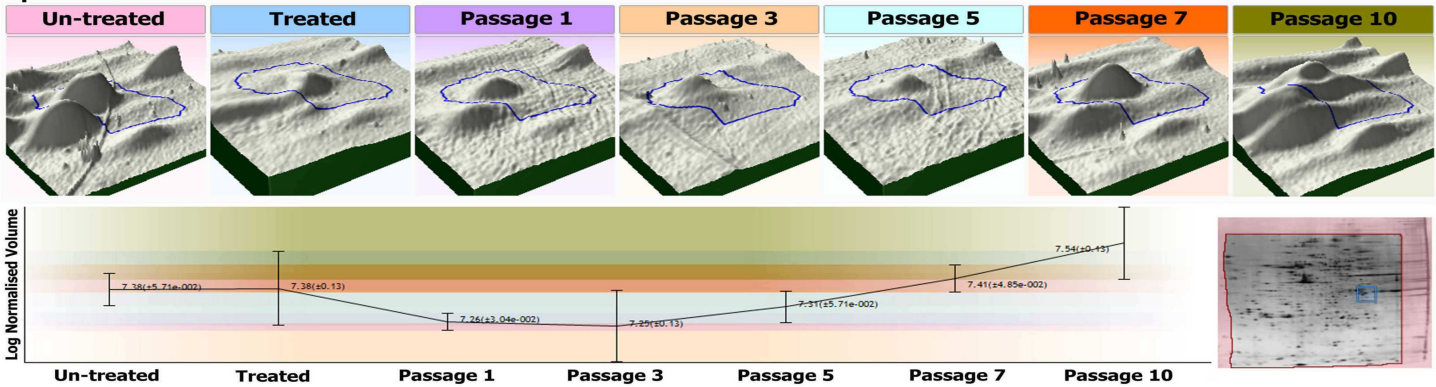

**Spot no. 1219**

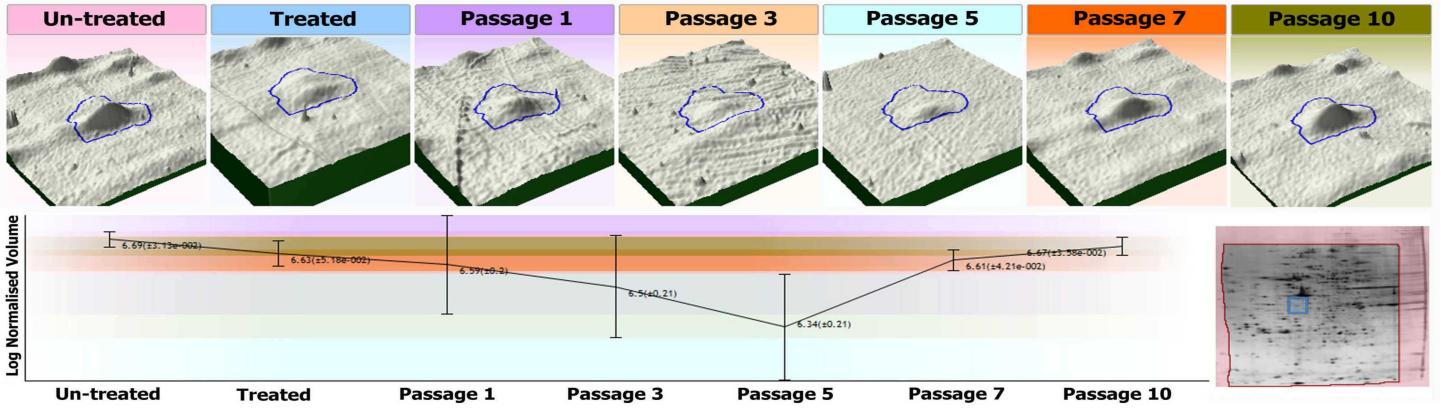

**Spot no. 960**

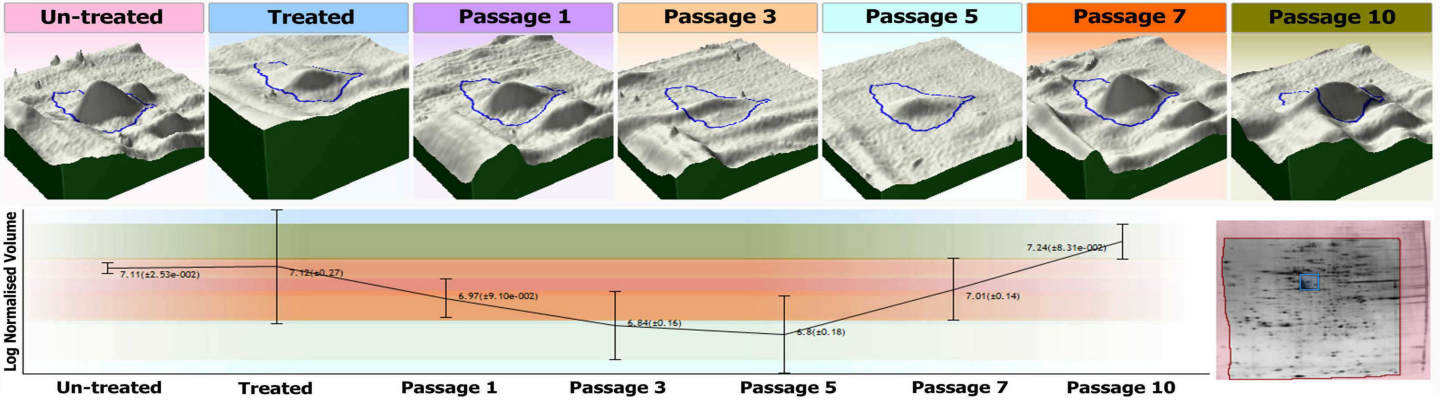

**Spot no. 1633**

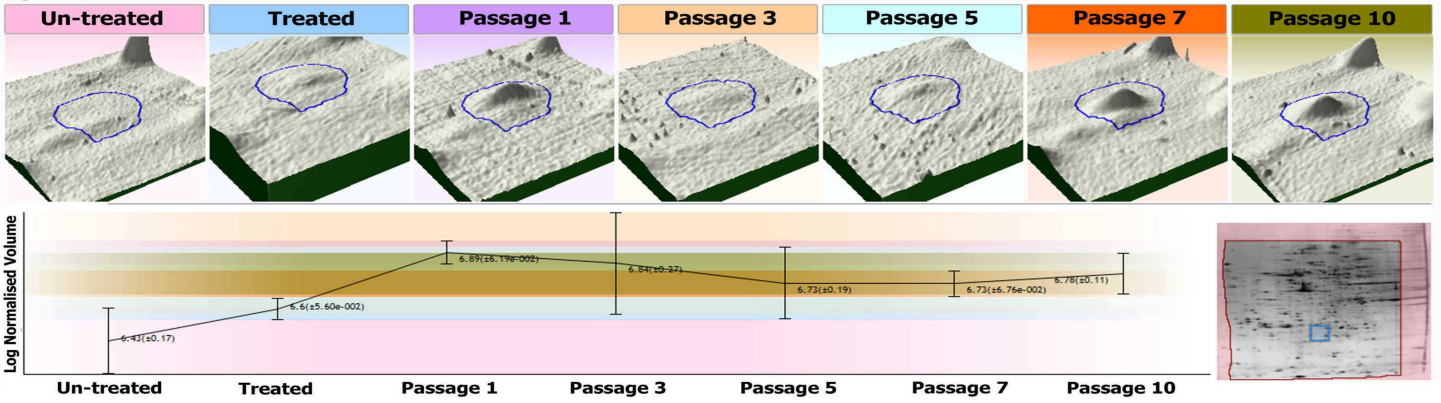

**Spot no. 854**

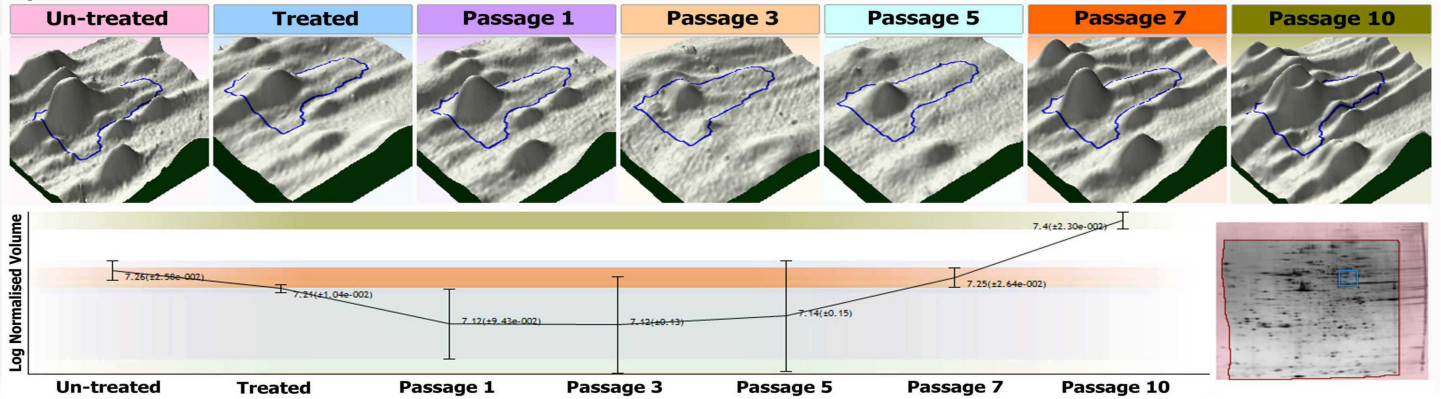



**Spot no. 1121**

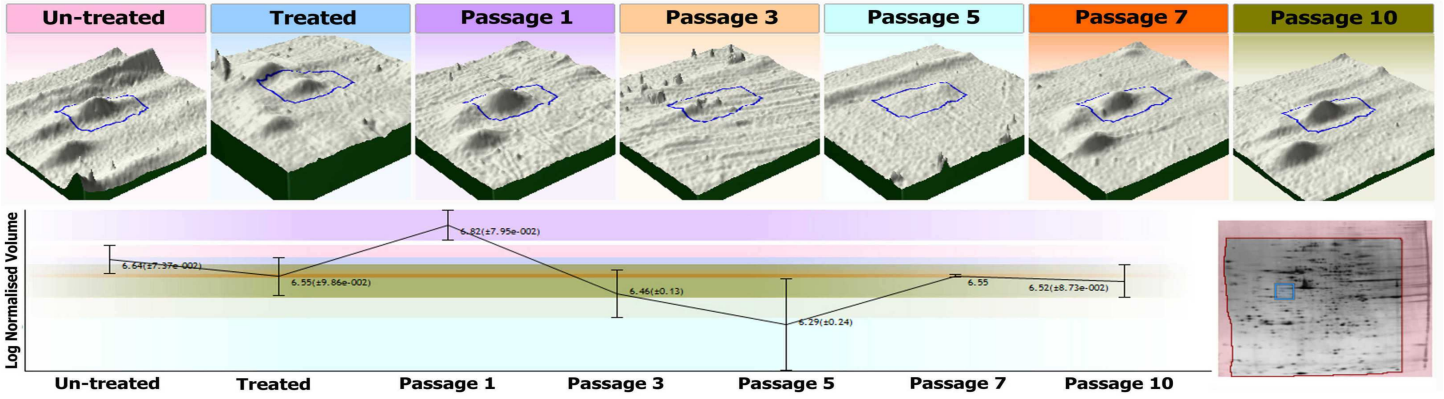

**Spot no. 4070**

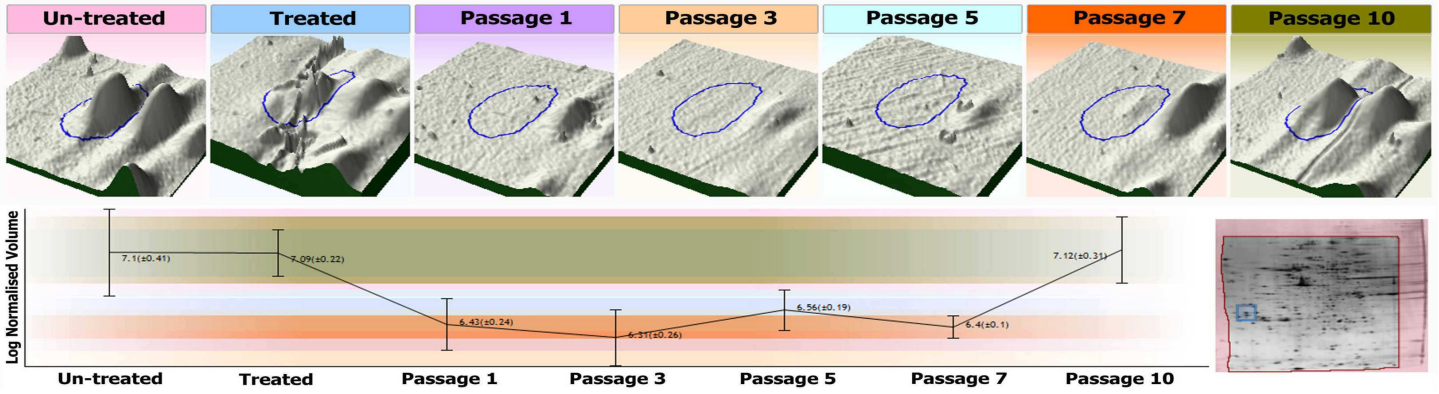

**Spot no. 603**

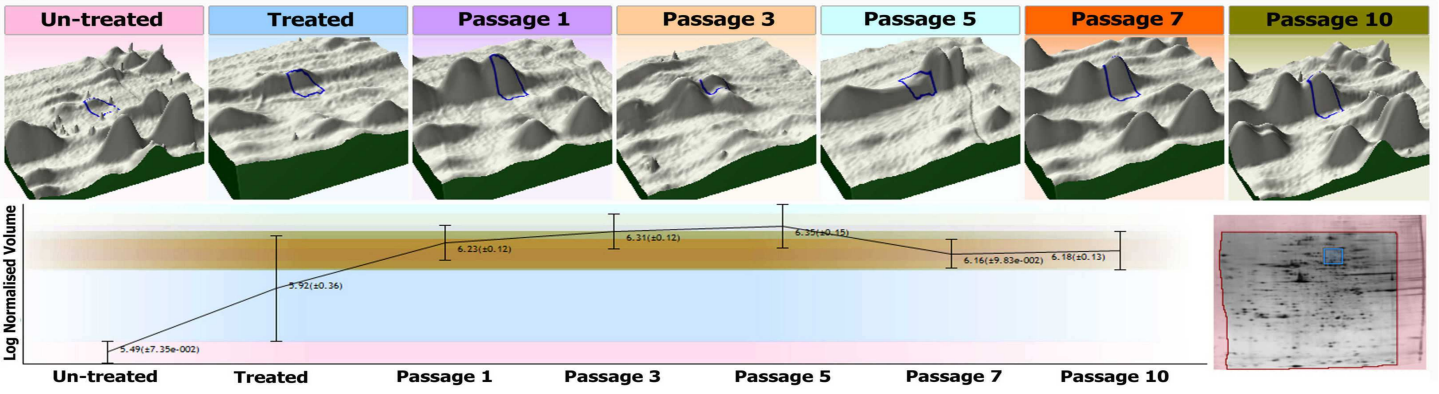

**Spot no. 1727**

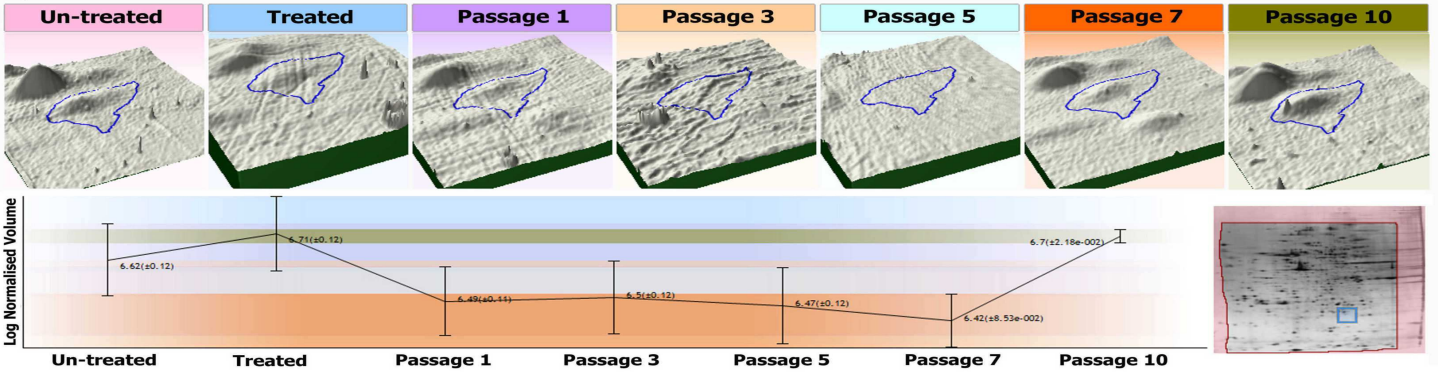

**Spot no. 2162**

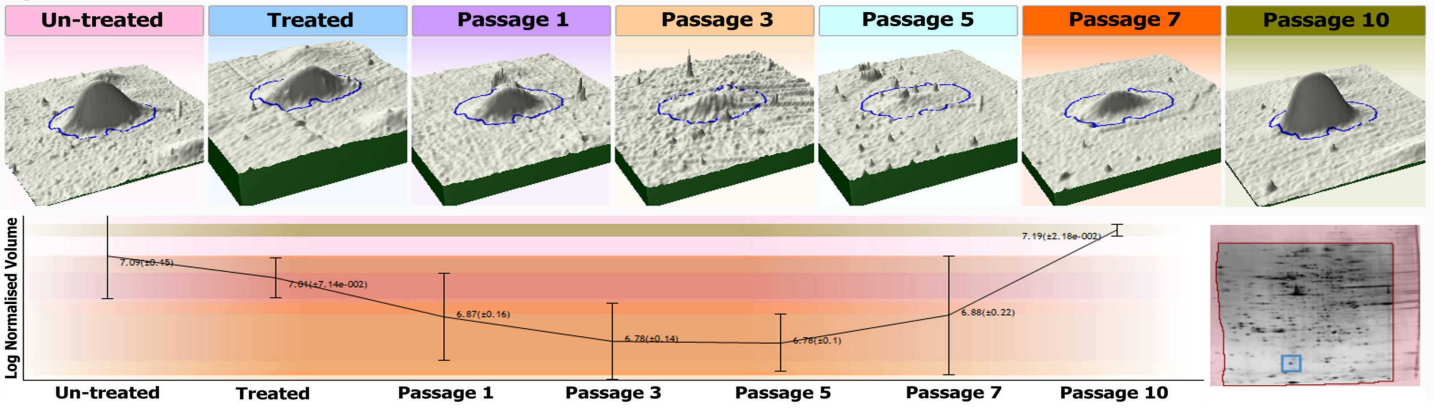

**Spot no. 1543**

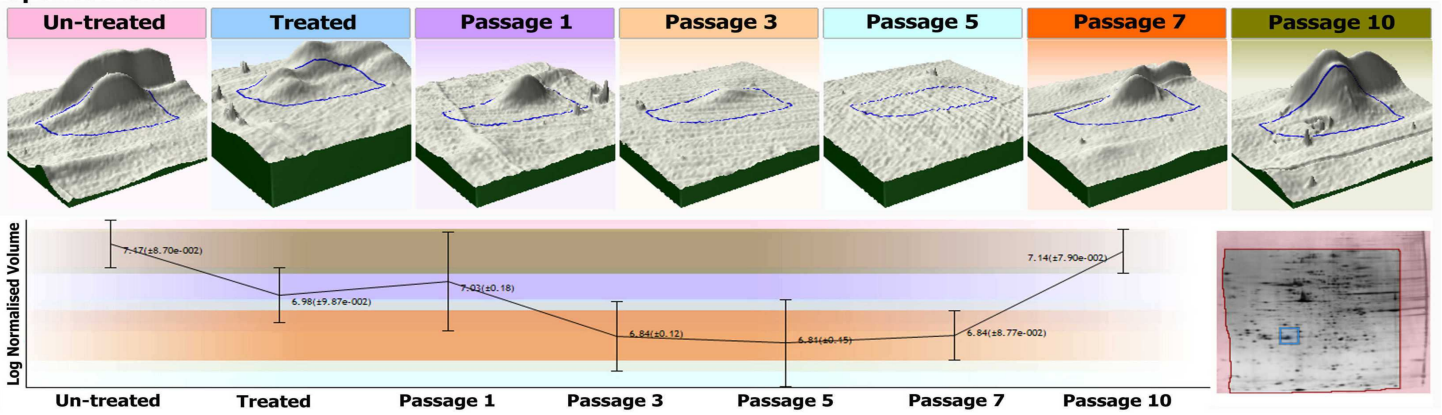

**Spot no. 710**

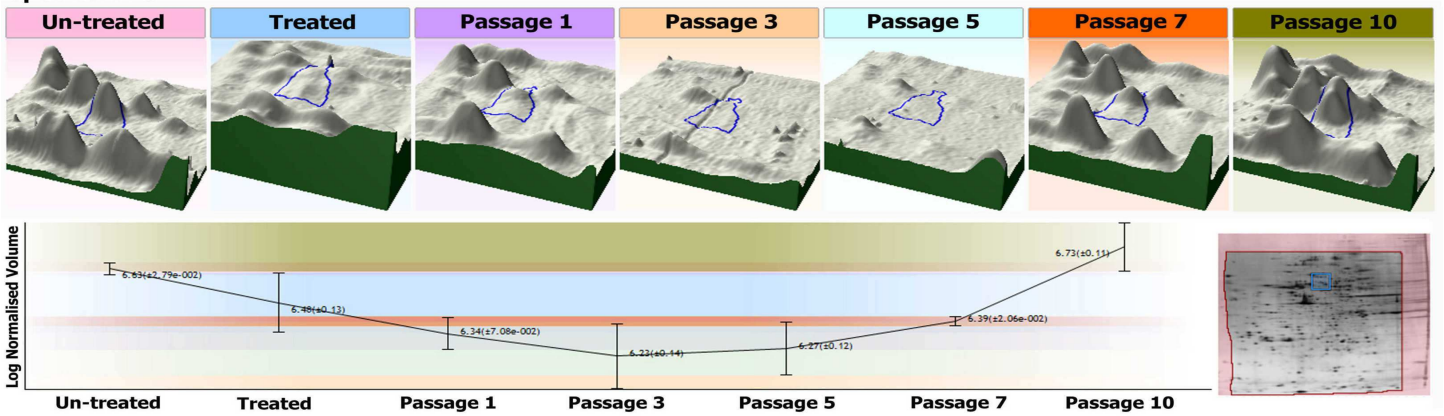

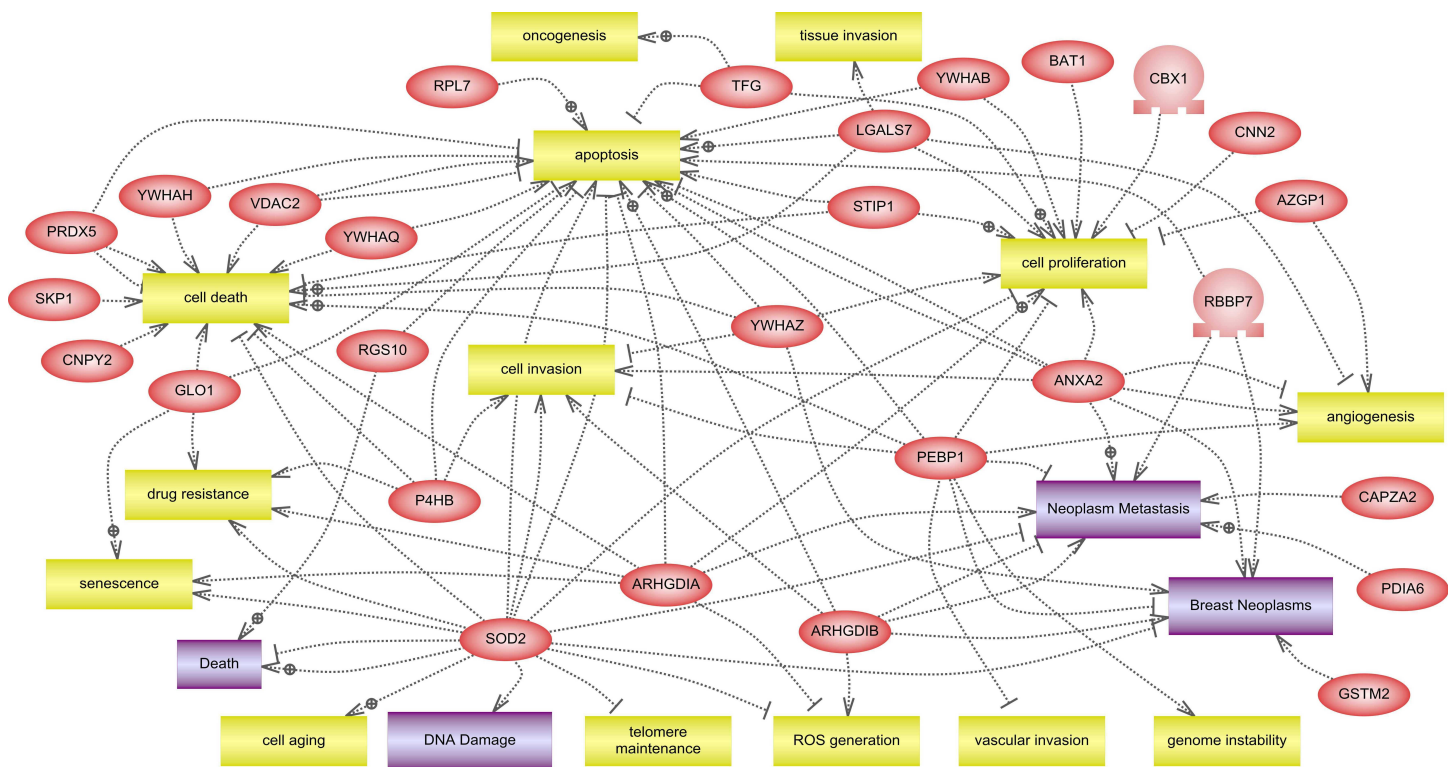

Pathway analysis of 28 out of 41 detected proteins/ isoforms in three analyzed cell lines (HB2, MDA-MB231, SKBR3) that are linked to neoplasms, metastasis or carcinogenesis.

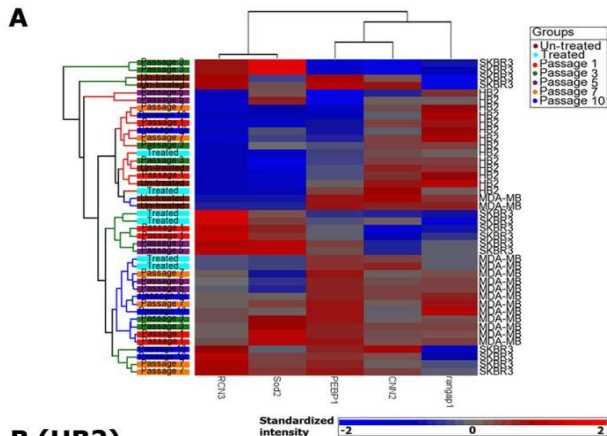

**B (HB2)**

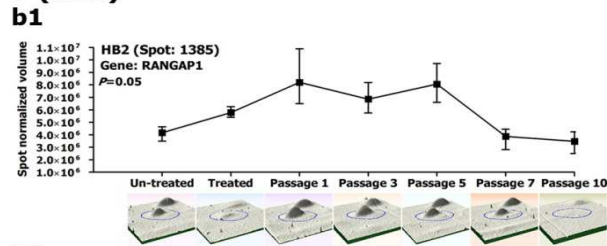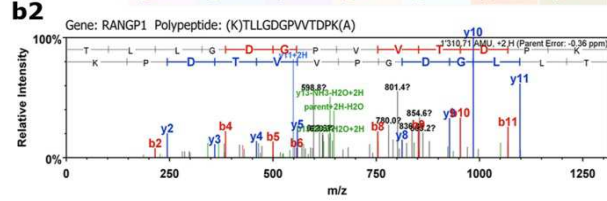

**D (SKBR3)**

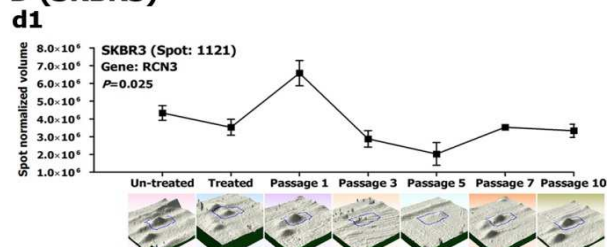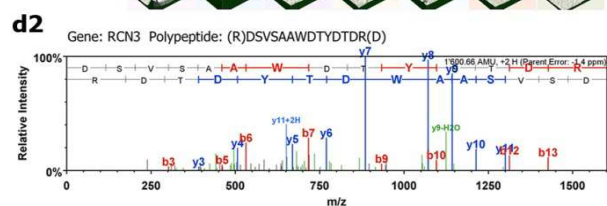

**C (MDA-MB231)**

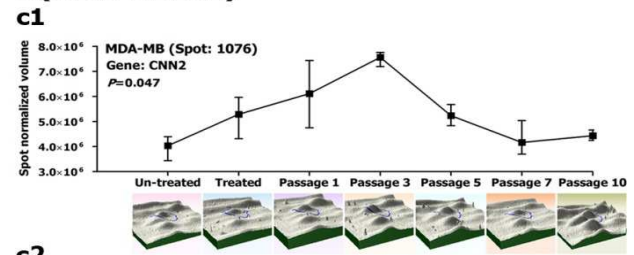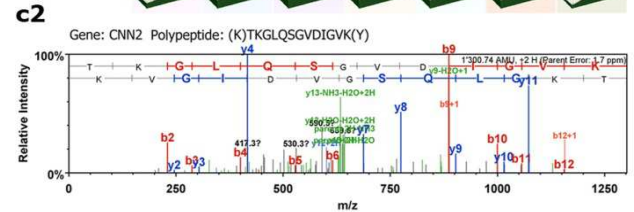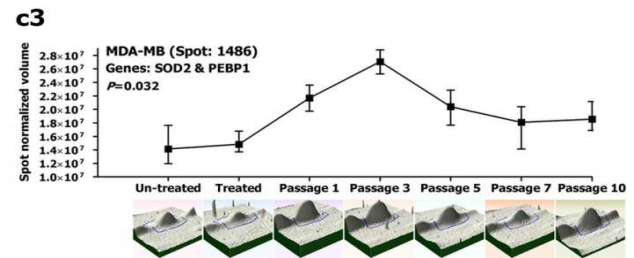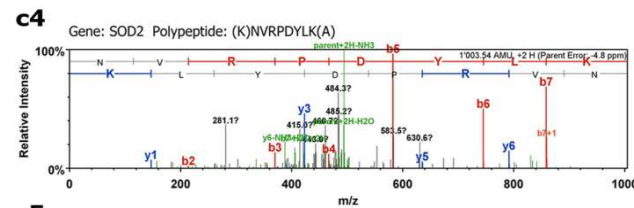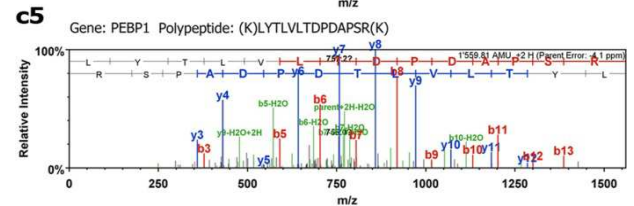

Expression profiles of five genes/proteins that were detected similarly in both transcriptomic and proteomic analysis. A) Expression profiles of five differentially expressed genes in transcriptomic analysis. B-D) Expression profiles of five proteins as significant changing markers in proteomic analysis for the HB2, MDA-MB231 and SKBR3 cell lines. b1-2) Proteomic profile of Rangp1 protein including expression pattern and LC/MS/MS detection. c1-2) Proteomic profile of Cnn2 protein including expression pattern and LC/MS/MS detection. c3-5) Proteomic profiles of Sod2 and Pebp1 proteins including expression pattern and LC/MS/MS detection. d1-2) Proteomic profile of Rnc3 protein including expression pattern and LC/MS/MS detection.
